# Supplementary material for: The Serum Resistome of a Globally Disseminated Multidrug Resistant Uropathogenic Escherichia coli Clone
Source: PubMed Central journal article supplement (PMC3789825; doi:10.1371/journal.pgen.1003834), 2013-10-03
Supplement: pgen.1003834.s001.pdf [file pgen.1003834.s001.pdf]

# Multiplexing using custom oligo

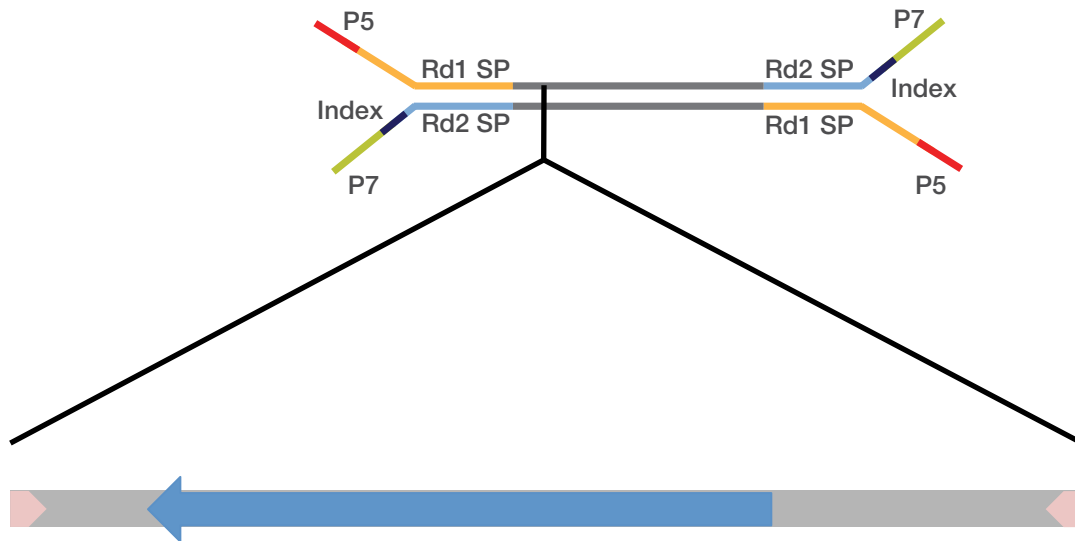

atccatgaccatggctaatcccatgctAGATGTGTATAAGAGACAGGENOMICSEQUENCE

AATGATACGGCGACCACCGAGATCTACACTCTTTCCCTACACGACGCTCTTCCGATCTNNNNNNatggctaattcccatgctAGATGTG

P5 Rd1 SP Index

Expected reads:

ACACTCTTTCCCTACACGACGCTCTTCCGATCTNNNNNNatggctaattcccatgctAGATGTGTATAAGAGACAGGENOMICSEQUENCE

Tag for miniTn5-derived reads
