# Supplementary material for: The Serum Resistome of a Globally Disseminated Multidrug Resistant Uropathogenic Escherichia coli Clone
Source: PLoS Genet. 2013 Oct 3;9(10):e1003834. doi: 10.1371/journal.pgen.1003834 (PMC3789825; doi:10.1371/journal.pgen.1003834)
Supplement: Table S1 — Summary of transposon insertions in each CDS within the EC958 chromosome. (XLSX) [file pgen.1003834.s004.xlsx]

## Sheet: EC958.essentialgenes
Table S1		Summary of transposon insertions in each CDS within the EC958 chromosome.
CDS information						Insertion summary and analysis							Compared with MG1655			COG classification			Essentiality
Sys.ID	Name	Start	End	Strand	Gene.length	Total.inserts	Total.reads	insertion index	pvalue_nonessential	pvalue_essential	log_likelihood_ratio	pvalue_no_hit	AA identities (Fasta36)	MG1655.Sys.ID	Products	COG	Code	Description	is.essential	in.Baba.list	in.EcoGene.list
EC958_0001	0001	11	127	+	116	18	432	0.155172	0.833909	4.31785e-16	45.1202	8.43906e-06	34.78	b0311	-	NA	NA	NA	N	N	N
EC958_0002	yeeU	195	545	+	350	71	1789	0.202857	0.948323	8.19711e-21	59.3225	4.91365e-16	89.26	b2004	CP4-44 prophage; antitoxin of the YeeV-YeeU toxin-antitoxin system	NA	NA	NA	N	N	N
EC958_0003	yeeV	653	1012	+	359	73	1546	0.203343	0.948973	7.33821e-21	59.4655	1.98497e-16	87.1	b2005	CP4-44 prophage; toxin of the YeeV-YeeU toxin-antitoxin system	NA	NA	NA	N	N	N
EC958_0004	0004	1027	1497	+	470	74	1708	0.157447	0.84229	2.57077e-16	45.8061	2.77168e-21	25.64	b3399	-	NA	NA	NA	N	N	N
EC958_0005	0005	1532	1690	+	158	26	1990	0.164557	0.866236	5.08201e-17	47.9439	1.22818e-07	37.5	b3207	-	NA	NA	NA	N	N	N
EC958_0006	0006	1811	1948	+	137	28	1034	0.20438	0.950337	5.79315e-21	59.7708	1.01807e-06	33.33	b4242	-	NA	NA	NA	N	N	N
EC958_0007	0007	2543	2737	+	194	25	527	0.128866	0.70825	1.73802e-13	37.1034	3.27088e-09	36.84	b1450	-	NA	NA	NA	N	N	N
EC958_0008	0008	3297	4901	+	1604	3	3	0.00187032	3.33892e-07	0.652839	-17.5786	6.96455e-71	23.57	b1011	-	COG0286	V	Type I restriction-modification system methyltransferase subunit	Y	N	N
EC958_0009	0009	4912	6084	+	1172	0	0	0	0	1	-173.929	5.47109e-52	24.49	b1961	-	COG0270	L	Site-specific DNA methylase	Y	N	N
EC958_0010	0010	6115	7836	-	1721	39	280	0.0226612	0.00820441	0.00570358	0.00419619	5.31432e-76	22.12	b1188	-	NA	NA	NA	N	N	N
EC958_0011	0011	7964	9232	-	1268	276	9395	0.217666	0.965088	2.80135e-22	63.6719	3.46055e-56	24.09	b4345	-	COG4268	V	McrBC 5-methylcytosine restriction system component	N	N	N
EC958_0012	0012	9243	11300	-	2057	466	15521	0.226544	0.972556	3.70087e-23	66.2686	1.06954e-90	39.57	b4346	-	COG1401	V	GTPase subunit of restriction endonuclease	N	N	N
EC958_0013	0013	13623	14717	+	1094	122	3333	0.111517	0.594204	9.07541e-12	31.7107	1.41157e-48	25.56	b2400	-	COG4857	R	Predicted kinase	N	N	N
EC958_0014	0014	14745	15842	+	1097	199	7568	0.181404	0.910866	1.09121e-18	52.975	1.04349e-48	24.56	b0308	-	COG0182	J	Predicted translation initiation factor 2B subunit, eIF-2B alpha/beta/delta family	N	N	N
EC958_0015	0015	15891	16514	+	623	258	13450	0.414125	0.99991	9.87407e-42	119.978	5.63248e-28	58.49	b2800	-	COG0235	G	Ribulose-5-phosphate 4-epimerase and related epimerases and aldolases	N	N	N
EC958_0016	0016	16822	17622	+	800	176	4917	0.22	0.967217	1.64522e-22	64.3555	1.02076e-35	37.29	b1453	-	COG4975	G	Putative glucose uptake permease	N	N	N
EC958_0017	yjhU	17681	18649	-	968	102	1779	0.105372	0.548131	3.68445e-11	29.7742	4.57929e-43	99.7	b4295	KpLE2 phage-like element; predicted DNA-binding transcriptional regulator	COG2390	K	Transcriptional regulator, contains sigma factor-related N-terminal domain	N	N	N
EC958_0018	0018	18705	18809	-	104	7	257	0.0673077	0.231056	2.16463e-07	17.3147	2.82592e-05	50	b1445	-	NA	NA	NA	N	N	N
EC958_0019	yjhF	19014	20345	-	1331	355	11891	0.266717	0.991167	3.8946e-27	77.9343	6.07572e-59	100	b4296	KpLE2 phage-like element; predicted transporter	COG2610	GE	H+/gluconate symporter and related permeases	N	N	N
EC958_0020	yjhG	20470	22419	-	1949	341	11622	0.174962	0.895639	4.7403e-18	51.0564	5.66228e-86	99.54	b4297	KpLE2 phage-like element; predicted dehydratase	COG0129	EG	Dihydroxyacid dehydratase/phosphogluconate dehydratase	N	N	N
EC958_0021	yjhH	22448	23335	-	887	147	4010	0.165727	0.869864	3.89193e-17	48.2949	1.59825e-39	100	b4298	KpLE2 phage-like element; predicted lyase/synthase	COG0329	EM	Dihydrodipicolinate synthase/N-acetylneuraminate lyase	N	N	N
EC958_0022	yjhI	23358	24128	-	770	80	1301	0.103896	0.536675	5.15825e-11	29.3068	2.09454e-34	99.24	b4299	KpLE2 phage-like element; predicted DNA-binding transcriptional regulator	COG1414	K	Transcriptional regulator	N	N	N
EC958_0023	0023	24174	24281	+	107	15	92	0.140187	0.769117	1.31549e-14	40.5738	2.08902e-05	34.48	b0231	-	NA	NA	NA	N	N	N
EC958_0024	sgcR	24449	25213	-	764	162	4180	0.212042	0.959424	1.00975e-21	62.023	3.83286e-34	99.62	b4300	KpLE2 phage-like element; predicted DNA-binding transcriptional regulator	COG1349	KG	Transcriptional regulators of sugar metabolism	N	N	N
EC958_0025	sgcE	25248	25862	-	614	71	1833	0.115635	0.623494	3.54921e-12	33	1.39428e-27	99.52	b4301	KpLE2 phage-like element; predicted epimerase	COG0036	G	Pentose-5-phosphate-3-epimerase	N	N	N
EC958_0026	sgcA	25892	26305	-	413	48	1076	0.116223	0.627565	3.10421e-12	33.1835	8.62695e-19	98.6	b4302	KpLE2 phage-like element; predicted phosphotransferase enzyme IIA component	COG1762	GT	Phosphotransferase system mannitol/fructose-specific IIA domain (Ntr-type)	N	N	N
EC958_0027	sgcQ	26454	27242	-	788	80	2106	0.101523	0.517962	8.86127e-11	28.5532	3.41814e-35	100	b4303	KpLE2 phage-like element; predicted nucleoside triphosphatase	COG0434	R	Predicted TIM-barrel enzyme	N	N	N
EC958_0028	sgcC	27273	28568	-	1295	148	4167	0.114286	0.614042	4.82783e-12	32.5782	2.28137e-57	99.77	b4304	KpLE2 phage-like element; predicted phosphotransferase enzyme IIC component	COG3775	G	Phosphotransferase system, galactitol-specific IIC component	N	N	N
EC958_0029	sgcB	28598	28858	-	260	38	896	0.146154	0.796982	3.3749e-15	42.3901	4.24522e-12	100	b4565	predicted enzyme IIB component of PTS	COG3414	G	Phosphotransferase system, galactitol-specific IIB component	N	N	N
EC958_0030	sgcX	28873	29976	-	1103	152	4842	0.137806	0.757199	2.26382e-14	39.8467	5.70235e-49	99.73	b4305	KpLE2 phage-like element; predicted endoglucanase with Zn-dependent exopeptidase domain	COG1363	G	Cellulase M and related proteins	N	N	N
EC958_0031	0031	30393	30635	-	242	30	1055	0.123967	0.678572	5.31061e-13	35.5905	2.60135e-11	39.53	b3431	-	NA	NA	NA	N	N	N
EC958_0032	yjhP	30781	31509	-	728	72	1554	0.0989011	0.496901	1.61099e-10	27.7176	1.4392e-32	95.97	b4306	KpLE2 phage-like element; predicted methyltransferase	COG2230	M	Cyclopropane fatty acid synthase and related methyltransferases	N	N	N
EC958_0033	yjhQ	31579	32112	-	533	78	1831	0.146341	0.797812	3.23358e-15	42.447	4.86626e-24	94.77	b4307	KpLE2 phage-like element; predicted acetyltransferase	COG3153	R	Predicted acetyltransferase	N	N	N
EC958_0034	yjhX	32142	32381	-	239	55	1323	0.230126	0.975123	1.6354e-23	67.3142	3.51897e-11	95.29	b4566	conserved protein	COG3811	S	Uncharacterized protein conserved in bacteria	N	N	N
EC958_0035	0035	32776	32925	-	149	22	473	0.147651	0.803535	2.39892e-15	42.8445	3.04027e-07	36.36	b1066	-	COG1670	J	Acetyltransferases, including N-acetylases of ribosomal proteins	N	N	N
EC958_0036	0036	33058	34026	+	968	308	16033	0.318182	0.998103	3.12276e-32	92.7224	4.57929e-43	22.86	b2921	-	COG1112	L	Superfamily I DNA and RNA helicases and helicase subunits	N	N	N
EC958_0037	nanS	34627	35526	-	899	265	7985	0.294772	0.996141	6.49404e-30	86.0141	4.77286e-40	96.72	b4309	probable 9-O-acetyl N-acetylneuraminic acid esterase	NA	NA	NA	N	N	N
EC958_0038	nanM	35671	36759	-	1088	313	10740	0.287684	0.995231	3.26861e-29	83.9772	2.58307e-48	98.37	b4310	N-acetylneuraminic acid mutarotase	COG3055	S	Uncharacterized protein conserved in bacteria	N	N	N
EC958_0039	nanC	36797	37495	-	698	174	3289	0.249284	0.985433	2.07318e-25	72.8876	2.95316e-31	100	b4311	N-acetylnuraminic acid outer membrane channel protein	NA	NA	NA	N	N	N
EC958_0040	fimB	38967	39149	+	182	32	621	0.175824	0.897802	3.89393e-18	51.3137	1.09529e-08	100	b4312	tyrosine recombinase/inversion of on/off regulator of fimA	COG4974	L	Site-specific recombinase XerD	N	N	N
EC958_0041	0041	39195	40187	-	992	120	2335	0.120968	0.659407	1.05225e-12	34.6606	4.08381e-44	23.66	b1106	-	COG3464	L	Transposase and inactivated derivatives	N	N	N
EC958_0042	0042	40434	40934	-	500	67	1314	0.134	0.737177	5.39138e-14	38.6815	1.35076e-22	24.6	b4204	-	COG4283	S	Uncharacterized conserved protein	N	N	N
EC958_0043	fimB	41100	41441	+	341	95	2436	0.278592	0.993759	2.5976e-28	81.3603	1.21634e-15	100	b4312	tyrosine recombinase/inversion of on/off regulator of fimA	COG4974	L	Site-specific recombinase XerD	N	N	N
EC958_0044	fimE	41937	42515	+	578	136	2128	0.235294	0.978433	5.03319e-24	68.8209	5.23537e-26	99.49	b4313	tyrosine recombinase/inversion of on/off regulator of fimA	COG4974	L	Site-specific recombinase XerD	N	N	N
EC958_0045	fimA	43012	43542	+	530	114	3105	0.215094	0.962596	5.03463e-22	62.9184	6.58282e-24	94.51	b4314	major type 1 subunit fimbrin (pilin)	COG3539	NU	P pilus assembly protein, pilin FimA	N	N	N
EC958_0046	fimI	43610	44146	+	536	142	3945	0.264925	0.990696	5.85923e-27	77.4167	3.59732e-24	100	b4315	fimbrial protein involved in type 1 pilus biosynthesis	COG3539	NU	P pilus assembly protein, pilin FimA	N	N	N
EC958_0047	fimC	44201	44908	+	707	159	4439	0.224894	0.971292	5.39065e-23	65.7867	1.19299e-31	99.17	b4316	chaperone, periplasmic	COG3121	NU	P pilus assembly protein, chaperone PapD	N	N	N
EC958_0048	fimD	44993	47611	+	2618	857	24053	0.327349	0.998569	3.86205e-33	95.342	3.10245e-115	99.32	b4317	outer membrane usher protein, type 1 fimbrial synthesis	COG3188	NU	P pilus assembly protein, porin PapC	N	N	N
EC958_0049	fimF	47639	48151	+	512	45	931	0.0878906	0.404982	1.98298e-09	24.1692	4.03377e-23	98.3	b4318	minor component of type 1 fimbriae	COG3539	NU	P pilus assembly protein, pilin FimA	N	N	N
EC958_0050	fimG	48182	48667	+	485	72	1446	0.148454	0.806977	1.99776e-15	43.0879	6.11872e-22	98.2	b4319	minor component of type 1 fimbriae	COG3539	NU	P pilus assembly protein, pilin FimA	N	N	N
EC958_0051	fimH	48705	49589	+	884	199	7252	0.225113	0.971463	5.12786e-23	65.8508	2.16203e-39	99.33	b4320	minor component of type 1 fimbriae	NA	NA	NA	N	N	N
EC958_0052	gntP	49781	51106	-	1325	141	3161	0.106415	0.55614	2.90455e-11	30.104	1.11181e-58	100	b4321	fructuronate transporter	COG2610	GE	H+/gluconate symporter and related permeases	N	N	N
EC958_0053	uxuA	51464	52630	+	1166	135	3852	0.11578	0.624503	3.43359e-12	33.0454	1.00117e-51	99.75	b4322	mannonate hydrolase	COG1312	G	D-mannonate dehydratase	N	N	N
EC958_0054	uxuB	52729	54171	+	1442	130	3854	0.0901526	0.424215	1.18399e-09	24.9038	8.48371e-64	99.59	b4323	D-mannonate oxidoreductase, NAD-binding	COG0246	G	Mannitol-1-phosphate/altronate dehydrogenases	N	N	N
EC958_0055	0055	54211	54387	-	176	10	139	0.0568182	0.151704	2.36605e-06	13.6614	2.0043e-08	31.82	b1497	-	NA	NA	NA	N	N	N
EC958_0056	uxuR	54404	55159	+	755	99	1753	0.131126	0.721256	1.03823e-13	37.7989	9.48794e-34	99.22	b4324	DNA-binding transcriptional repressor	COG2186	K	Transcriptional regulators	N	N	N
EC958_0057	yjiC	55415	55975	-	560	6	221	0.0107143	0.00047241	0.0869164	-6.82091	3.20809e-25	94.79	b4325	predicted protein	NA	NA	NA	Y	N	N
EC958_0058	0058	56676	56792	+	116	41	1654	0.353448	0.999367	1.0059e-35	102.78	8.43906e-06	30.77	b2944	-	NA	NA	NA	N	N	N
EC958_0059	iraD	56776	57150	+	374	95	2591	0.254011	0.987266	7.05636e-26	74.2582	4.382e-17	98.46	b4326	RpoS stabilzer after DNA damage, anti-RssB factor	COG3518	S	Uncharacterized protein conserved in bacteria	N	N	N
EC958_0060	yjiE	57161	58054	-	893	73	1953	0.0817469	0.352337	8.04733e-09	22.1576	8.73397e-40	99.34	b4327	predicted DNA-binding transcriptional regulator	COG0583	K	Transcriptional regulator	N	N	N
EC958_0061	iadA	58137	59291	-	1154	104	2467	0.0901213	0.42395	1.19246e-09	24.8936	3.35253e-51	99.23	b4328	isoaspartyl dipeptidase	COG0044	F	Dihydroorotase and related cyclic amidohydrolases	N	N	N
EC958_0062	yjiG	59322	59765	-	443	40	1386	0.0902935	0.425409	1.14656e-09	24.9494	4.20428e-20	100	b4329	inner membrane protein, SpmB family	COG0700	S	Uncharacterized membrane protein	N	N	N
EC958_0063	yjiH	59780	60445	-	665	47	961	0.0706767	0.258546	1.00414e-07	18.4614	8.19725e-30	100	b4330	predicted inner membrane protein	COG3314	S	Uncharacterized protein conserved in bacteria	N	N	N
EC958_0064	kptA	60713	61249	+	536	49	1300	0.0914179	0.434913	8.87274e-10	25.3133	3.59732e-24	99.46	b4331	RNA 2'-phosphotransferase	COG1859	J	RNA:NAD 2'-phosphotransferase	N	N	N
EC958_0065	yjiJ	61280	62440	-	1160	147	2556	0.126724	0.695524	2.83227e-13	36.4429	1.83206e-51	98.47	b4332	predicted inner membrane protein	NA	NA	NA	N	N	N
EC958_0066	yjiK	62526	63287	-	761	105	2714	0.137976	0.758067	2.17757e-14	39.8988	5.18488e-34	98.46	b4333	conserved protein	COG3204	S	Uncharacterized protein conserved in bacteria	N	N	N
EC958_0067	0067	63451	63690	-	239	33	1119	0.138075	0.75857	2.12899e-14	39.9291	3.51897e-11	38.24	b1793	-	NA	NA	NA	N	N	N
EC958_0068	yjiL	63705	64454	-	749	67	1561	0.0894526	0.418277	1.38885e-09	24.6768	1.73622e-33	96.06	b4334	predicted ATPase, activator of (R)-hydroxyglutaryl-CoA dehydratase	COG1924	I	Activator of 2-hydroxyglutaryl-CoA dehydratase (HSP70-class ATPase domain)	N	N	N
EC958_0069	yjiM	64482	65615	-	1133	110	2999	0.0970874	0.482112	2.43603e-10	27.1375	2.779e-50	98.43	b4335	predicted 2-hydroxyglutaryl-CoA dehydratase	COG1775	E	Benzoyl-CoA reductase/2-hydroxyglutaryl-CoA dehydratase subunit, BcrC/BadD/HgdB	N	N	N
EC958_0070	yjiN	65749	67011	-	1262	80	1516	0.0633914	0.200162	5.28639e-07	15.9666	6.33254e-56	99.06	b4336	zinc-type alcohol dehydrogenase-like protein	COG2733	S	Predicted membrane protein	N	N	N
EC958_0071	mdtM	67070	68284	-	1214	111	2869	0.0914333	0.435042	8.8417e-10	25.3183	7.96237e-54	97.07	b4337	multidrug efflux system protein	COG2814	G	Arabinose efflux permease	N	N	N
EC958_0072	yfcI	68769	69707	+	938	146	4781	0.15565	0.835701	3.8721e-16	45.2644	9.39644e-42	61.92	b2305	conserved protein	COG5464	S	Uncharacterized conserved protein	N	N	N
EC958_0073	yjiR	69968	71362	-	1394	148	3141	0.106169	0.55426	3.07197e-11	30.0264	1.06672e-61	99.15	b4340	fused predicted DNA-binding transcriptional regulator/predicted aminotransferase	COG1167	KE	Transcriptional regulators containing a DNA-binding HTH domain and an aminotransferase domain (MocR family) and their eukaryotic orthologs	N	N	N
EC958_0074	yjiS	71557	71703	+	146	17	323	0.116438	0.629051	2.95532e-12	33.2507	4.11272e-07	90.74	b4341	conserved protein	COG5457	S	Uncharacterized conserved small protein	N	N	N
EC958_0075	symE	71764	72084	-	320	78	2597	0.24375	0.98297	7.32092e-25	71.2809	1.00825e-14	89.91	b4347	toxic peptide regulated by antisense sRNA symR	NA	NA	NA	N	N	N
EC958_0076	0076	72317	75574	-	3257	510	11084	0.156586	0.83916	3.12836e-16	45.5466	3.48805e-143	21.8	b4350	-	COG0610	V	Type I site-specific restriction-modification system, R (restriction) subunit and related helicases	N	N	N
EC958_0077	0077	75675	76961	-	1286	138	2478	0.107309	0.562948	2.36875e-11	30.3864	5.64736e-57	17.79	b4348	-	COG0732	V	Restriction endonuclease S subunits	N	N	N
EC958_0078	0078	76969	78570	-	1601	164	3723	0.102436	0.525204	7.19581e-11	28.8435	9.42127e-71	24.64	b4349	-	COG0286	V	Type I restriction-modification system methyltransferase subunit	N	N	N
EC958_0079	0079	78652	79800	-	1148	93	2461	0.0810105	0.346016	9.51863e-09	21.9148	6.13488e-51	34.32	b4351	-	COG1715	V	Restriction endonuclease	N	N	N
EC958_0080	0080	80015	80284	+	269	30	651	0.111524	0.594254	9.06136e-12	31.7128	1.71495e-12	28.85	b1060	-	COG2929	S	Uncharacterized protein conserved in bacteria	N	N	N
EC958_0081	0081	80334	80573	+	239	17	357	0.0711297	0.262295	9.05603e-08	18.6148	3.51897e-11	22.09	b2897	-	COG3514	S	Uncharacterized protein conserved in bacteria	N	N	N
EC958_0082	yjiA	80625	81563	-	938	94	2166	0.100213	0.50749	1.19446e-10	28.1362	9.39644e-42	99.06	b4352	predicted GTPase	COG0523	R	Putative GTPases (G3E family)	N	N	N
EC958_0083	yjiX	81592	81777	-	185	15	413	0.0810811	0.346622	9.36658e-09	21.9381	8.09681e-09	100	b4353	conserved protein	COG2879	S	Uncharacterized small protein	N	N	N
EC958_0084	yjiY	81845	83977	-	2132	310	8815	0.145403	0.793632	4.0047e-15	42.1621	5.60767e-94	99.86	b4354	predicted inner membrane protein	COG1966	T	Carbon starvation protein, predicted membrane protein	N	N	N
EC958_0085	tsr	84372	86018	+	1646	182	3909	0.110571	0.587289	1.12607e-11	31.4135	1.01359e-72	98.92	b4355	methyl-accepting chemotaxis protein I, serine sensor receptor	COG0840	NT	Methyl-accepting chemotaxis protein	N	N	N
EC958_0086	yjjL	86085	87428	-	1343	232	6552	0.172748	0.889903	7.85279e-18	50.3956	1.81439e-59	99.12	b4356	L-galactonate transporter	COG2271	G	Sugar phosphate permease	N	N	N
EC958_0087	yjjM	87663	88559	-	896	215	4569	0.239955	0.981058	1.739e-24	70.1777	6.45647e-40	99.01	b4357	DNA-binding transcriptional activator for yjjMN; mutants fail to grow on L-galactonate	COG1802	K	Transcriptional regulators	N	N	N
EC958_0088	yjjN	88716	89720	+	1004	150	3766	0.149402	0.810983	1.60916e-15	43.3755	1.21955e-44	99.12	b4358	L-galactonate oxidoreductase	COG1063	ER	Threonine dehydrogenase and related Zn-dependent dehydrogenases	N	N	N
EC958_0089	opgB	89878	92151	-	2273	232	5325	0.102068	0.52229	7.82601e-11	28.7265	3.81598e-100	99.48	b4359	phosphoglycerol transferases I and II	COG1368	M	Phosphoglycerol transferase and related proteins, alkaline phosphatase superfamily	N	N	N
EC958_0090	yjjA	92423	92902	-	479	43	1050	0.0897704	0.420974	1.2918e-09	24.7799	1.11968e-21	100	b4360	conserved protein	NA	NA	NA	N	N	N
EC958_0091	dnaC	92966	93685	-	719	3	5	0.00417246	9.92376e-06	0.386238	-13.111	3.56263e-32	100	b4361	DNA biosynthesis protein	COG1484	L	DNA replication protein	Y	Y	Y
EC958_0092	dnaT	93706	94227	-	521	0	0	0	0	1	-173.929	1.62953e-23	100	b4362	DNA biosynthesis protein (primosomal protein I)	COG5529	R	Pyocin large subunit	Y	N	N
EC958_0093	yjjB	94352	94801	-	449	37	872	0.0824053	0.357989	6.92558e-09	22.3745	2.29752e-20	98.71	b4363	conserved inner membrane protein	COG3610	S	Uncharacterized conserved protein	N	N	N
EC958_0094	yjjP	94816	95622	-	806	100	1499	0.124069	0.679214	5.1879e-13	35.6222	5.57816e-36	99.61	b4364	inner membrane protein, H-NS-repressed, DUF1212 family	COG2966	S	Uncharacterized conserved protein	N	N	N
EC958_0095	yjjQ	96207	96914	+	707	153	2668	0.216407	0.963889	3.73213e-22	63.3033	1.19299e-31	100	b4365	predicted DNA-binding transcriptional regulator	COG2197	TK	Response regulator containing a CheY-like receiver domain and an HTH DNA-binding domain	N	N	N
EC958_0096	bglJ	97040	97549	+	509	167	5277	0.328094	0.998602	3.25861e-33	95.5548	5.45667e-23	99.43	b4366	DNA-binding transcriptional activator for silent bgl operon, requires the bglJ4 allele to function; LuxR family	COG2197	TK	Response regulator containing a CheY-like receiver domain and an HTH DNA-binding domain	N	N	N
EC958_0097	fhuF	97605	98375	-	770	80	2269	0.103896	0.536675	5.15825e-11	29.3068	2.09454e-34	96.95	b4367	ferric iron reductase involved in ferric hydroximate transport	COG4114	R	Uncharacterized Fe-S protein	N	N	N
EC958_0098	yjjZ	98495	98752	+	257	23	218	0.0894942	0.41863	1.37576e-09	24.6903	5.74271e-12	94.87	b4567	predicted protein	NA	NA	NA	N	N	N
EC958_0099	rsmC	99331	100344	-	1013	104	2406	0.102665	0.527015	6.82917e-11	28.9163	4.92663e-45	99.13	b4371	16S rRNA m(2)G1207 methyltransferase	COG2813	J	16S RNA G1207 methylase RsmC	N	N	N
EC958_0100	holD	100465	100860	+	395	4	42	0.0101266	0.000377304	0.099379	-7.25038	5.28635e-18	97.08	b4372	DNA polymerase III, psi subunit	COG3050	L	DNA polymerase III, psi subunit	Y	N	N
EC958_0101	rimI	100847	101275	+	428	43	1046	0.100467	0.50953	1.12723e-10	28.2172	1.90447e-19	98.65	b4373	acetylase for 30S ribosomal subunit protein S18	COG0456	R	Acetyltransferases	N	N	N
EC958_0102	yjjG	101308	101967	+	659	51	1412	0.07739	0.31503	2.17302e-08	20.7149	1.50003e-29	99.56	b4374	dUMP phosphatase	COG1011	R	Predicted hydrolase (HAD superfamily)	N	N	N
EC958_0103	prfC	102076	103647	+	1571	191	3930	0.121579	0.663371	9.15441e-13	34.8503	1.93319e-69	99.81	b4375	peptide chain release factor RF-3	COG4108	J	Peptide chain release factor RF-3	N	N	N
EC958_0104	osmY	104058	104645	+	587	55	1463	0.0936968	0.454042	5.2773e-10	26.0487	2.11494e-26	100	b4376	periplasmic protein	COG2823	R	Predicted periplasmic or secreted lipoprotein	N	N	N
EC958_0105	ytjA	104790	104933	+	143	12	354	0.0839161	0.370958	4.90758e-09	22.8708	5.56346e-07	100	b4568	predicted protein	COG5487	S	Small integral membrane protein	N	N	N
EC958_0106	yjjU	105073	106128	+	1055	111	2614	0.105213	0.546906	3.82015e-11	29.724	7.16999e-47	99.44	b4377	conserved protein, patatin-like family	COG4667	R	Predicted esterase of the alpha-beta hydrolase superfamily	N	N	N
EC958_0107	yjjV	106143	106907	+	764	84	2328	0.109948	0.582696	1.29806e-11	31.2175	3.83286e-34	94.96	b4378	predicted DNase	COG0084	L	Mg-dependent DNase	N	N	N
EC958_0108	yjjW	107340	108185	-	845	106	3869	0.125444	0.687732	3.79238e-13	36.0473	1.09819e-37	99.3	b4379	predicted pyruvate formate lyase activating enzyme	COG1180	O	Pyruvate-formate lyase-activating enzyme	N	N	N
EC958_0109	yjjI	108175	109707	-	1532	164	5065	0.10705	0.560976	2.51334e-11	30.3044	9.81951e-68	99.03	b4380	conserved protein	COG1328	F	Oxygen-sensitive ribonucleoside-triphosphate reductase	N	N	N
EC958_0110	0110	109701	109808	+	107	9	58	0.0841121	0.372641	4.69303e-09	22.9351	2.08902e-05	37.04	b3623	-	NA	NA	NA	N	N	N
EC958_0111	deoC	109983	110744	+	761	86	1874	0.113009	0.604968	6.45876e-12	32.1785	5.18488e-34	99.61	b4381	2-deoxyribose-5-phosphate aldolase, NAD(P)-linked	COG0274	F	Deoxyribose-phosphate aldolase	N	N	N
EC958_0112	deoA	110840	112144	+	1304	138	4167	0.105828	0.551643	3.32039e-11	29.9186	9.21608e-58	99.09	b4382	thymidine phosphorylase	COG0213	F	Thymidine phosphorylase	N	N	N
EC958_0113	deoB	112214	113419	+	1205	146	3580	0.121162	0.66067	1.0067e-12	34.7209	1.97102e-53	99.75	b4383	phosphopentomutase	COG1015	G	Phosphopentomutase	N	N	N
EC958_0114	deoD	113494	114195	+	701	89	2291	0.126961	0.696953	2.68308e-13	36.5161	2.18308e-31	99.58	b4384	purine-nucleoside phosphorylase	COG0813	F	Purine-nucleoside phosphorylase	N	N	N
EC958_0115	yjjJ	114380	115693	+	1313	117	2083	0.0891089	0.415357	1.50206e-09	24.5652	3.72303e-58	97.52	b4385	predicted DNA-binding transcriptional regulator	COG3550	R	Uncharacterized protein related to capsule biosynthesis enzymes	N	N	N
EC958_0116	lplA	115712	116710	-	998	98	2611	0.0981964	0.491175	1.89178e-10	27.4924	2.23168e-44	99.11	b4386	lipoate-protein ligase A	COG0095	H	Lipoate-protein ligase A	N	N	N
EC958_0117	ytjB	116756	117382	-	626	66	1938	0.105431	0.548589	3.63488e-11	29.793	4.16374e-28	99.53	b4387	conserved membrane protein	COG3726	R	Uncharacterized membrane protein affecting hemolysin expression	N	N	N
EC958_0118	serB	117506	118456	+	950	110	2095	0.115789	0.624566	3.42653e-12	33.0482	2.80606e-42	99.07	b4388	3-phosphoserine phosphatase	COG0560	E	Phosphoserine phosphatase	N	N	N
EC958_0119	radA	118523	119887	+	1364	140	3655	0.102639	0.526809	6.86986e-11	28.908	2.18885e-60	99.35	b4389	DNA repair protein	COG1066	O	Predicted ATP-dependent serine protease	N	N	N
EC958_0120	nadR	119905	121143	+	1238	144	4339	0.116317	0.628212	3.03848e-12	33.2128	7.10085e-55	99.03	b4390	bifunctional DNA-binding transcriptional repressor/ NMN adenylyltransferase	COG3172	H	Predicted ATPase/kinase involved in NAD metabolism	N	N	N
EC958_0121	yjjK	121282	122931	-	1649	160	3226	0.0970285	0.481629	2.46895e-10	27.1187	7.49281e-73	99.64	b4391	fused predicted transporter subunits of ABC superfamily: ATP-binding components	COG0488	R	ATPase components of ABC transporters with duplicated ATPase domains	N	N	N
EC958_0122	0122	122941	123069	+	128	16	444	0.125	0.684999	4.19618e-13	35.9101	2.52016e-06	30.56	b2069	-	NA	NA	NA	N	N	N
EC958_0123	slt	123156	125075	+	1919	208	5449	0.10839	0.571095	1.85161e-11	30.7271	1.16187e-84	99.69	b4392	lytic murein transglycosylase, soluble	COG0741	M	Soluble lytic murein transglycosylase and related regulatory proteins (some contain LysM/invasin domains)	N	N	N
EC958_0124	trpR	125183	125491	+	308	32	847	0.103896	0.536675	5.15825e-11	29.3068	3.37626e-14	99.07	b4393	DNA-binding transcriptional repressor, tryptophan-binding	COG2973	K	Trp operon repressor	N	N	N
EC958_0125	yjjX	125588	126106	-	518	30	625	0.0579151	0.159446	1.84253e-06	14.0501	2.20434e-23	99.41	b4394	inosine/xanthosine triphosphatase	COG1986	S	Uncharacterized conserved protein	N	N	N
EC958_0126	ytjC	126167	126796	+	629	76	1768	0.120827	0.658487	1.08663e-12	34.6169	3.07799e-28	99.07	b4395	predicted phosphoglyceromutase 2, co-factor independent	COG0406	G	Fructose-2,6-bisphosphatase	N	N	N
EC958_0127	rob	126811	127662	-	851	123	3108	0.144536	0.789704	4.88057e-15	41.8984	6.00127e-38	100	b4396	right oriC-binding transcriptional activator, AraC family	COG2207	K	AraC-type DNA-binding domain-containing proteins	N	N	N
EC958_0128	creA	127891	128346	+	455	61	1328	0.134066	0.737534	5.31094e-14	38.7017	1.25553e-20	100	b4397	conserved protein	COG3045	S	Uncharacterized protein conserved in bacteria	N	N	N
EC958_0129	creB	128377	129048	+	671	77	1815	0.114754	0.617339	4.33885e-12	32.7246	4.47956e-30	98.69	b4398	DNA-binding response regulator in two-component regulatory system with CreC	COG0745	TK	Response regulators consisting of a CheY-like receiver domain and a winged-helix DNA-binding domain	N	N	N
EC958_0130	creC	129066	130472	+	1406	137	3315	0.0974395	0.484996	2.24808e-10	27.2503	3.18555e-62	98.95	b4399	sensory histidine kinase in two-component regulatory system with CreB or PhoB, regulator of the CreBC regulon	COG0642	T	Signal transduction histidine kinase	N	N	N
EC958_0131	creD	130548	131882	+	1334	155	5080	0.116192	0.627352	3.12613e-12	33.1738	4.49139e-59	97.56	b4400	inner membrane protein	COG4452	V	Inner membrane protein involved in colicin E2 resistance	N	N	N
EC958_0132	arcA	131960	132658	-	698	64	1145	0.0916905	0.437211	8.338e-10	25.4015	2.95316e-31	100	b4401	DNA-binding response regulator in two-component regulatory system with ArcB or CpxA	COG0745	TK	Response regulators consisting of a CheY-like receiver domain and a winged-helix DNA-binding domain	N	N	N
EC958_0133	yjjY	132772	132894	+	122	18	791	0.147541	0.803059	2.45986e-15	42.8111	4.6117e-06	100	b4402	predicted protein	NA	NA	NA	N	N	N
EC958_0134	yjtD	133312	133980	+	668	77	1819	0.115269	0.620947	3.85784e-12	32.8857	6.05971e-30	97.81	b4403	predicted rRNA methyltransferase	COG0565	J	rRNA methylase	N	N	N
EC958_0135	thrA	134359	136803	+	2444	277	7132	0.113339	0.607323	5.99121e-12	32.2818	1.2655e-107	100	b0002	fused aspartokinase I and homoserine dehydrogenase I	COG0527	E	Aspartokinases	N	N	N
EC958_0136	thrB	136823	137737	+	914	99	2273	0.108315	0.570535	1.88341e-11	30.7036	1.05365e-40	99.35	b0003	homoserine kinase	COG0083	E	Homoserine kinase	N	N	N
EC958_0137	thrC	137756	139024	+	1268	127	3000	0.100158	0.507045	1.20967e-10	28.1185	3.46055e-56	99.53	b0004	threonine synthase	COG0498	E	Threonine synthase	N	N	N
EC958_0138	yaaX	139256	139534	+	278	33	770	0.118705	0.644453	1.76264e-12	33.9572	6.92789e-13	85	b0005	predicted protein	NA	NA	NA	N	N	N
EC958_0139	yaaA	139592	140350	-	758	75	2248	0.0989446	0.497253	1.5951e-10	27.7315	7.01384e-34	98.84	b0006	conserved protein, UPF0246 family	COG3022	S	Uncharacterized protein conserved in bacteria	N	N	N
EC958_0140	yaaJ	140438	141850	-	1412	169	4611	0.119688	0.651003	1.40862e-12	34.2631	1.74081e-62	98.95	b0007	predicted transporter	COG1115	E	Na+/alanine symporter	N	N	N
EC958_0141	talB	142147	143082	+	935	115	3414	0.122995	0.672441	6.62854e-13	35.2894	1.2711e-41	99.68	b0008	transaldolase B	COG0176	G	Transaldolase	N	N	N
EC958_0142	mog	143215	143784	+	569	58	1256	0.101933	0.521223	8.06978e-11	28.6837	1.29598e-25	99.49	b0009	molybdochelatase incorporating molybdenum into molybdopterin	COG0521	H	Molybdopterin biosynthesis enzymes	N	N	N
EC958_0143	yaaH	143837	144385	-	548	56	1432	0.10219	0.523256	7.61128e-11	28.7652	1.07427e-24	99.47	b0010	inner membrane protein, Grp1_Fun34_YaaH family	COG1584	S	Predicted membrane protein	N	N	N
EC958_0144	yaaW	144552	145247	-	695	77	1946	0.110791	0.588905	1.07091e-11	31.4827	3.99487e-31	99.58	b0011	conserved protein, UPF0174 family	COG4735	S	Uncharacterized protein conserved in bacteria	N	N	N
EC958_0145	yaaI	145291	145677	-	386	53	1892	0.137306	0.754635	2.53734e-14	39.6938	1.3086e-17	95.52	b0013	conserved protein, UPF0412 family	NA	NA	NA	N	N	N
EC958_0146	dnaK	146066	147964	+	1898	105	1282	0.0553214	0.141388	3.32838e-06	13.128	9.63102e-84	100	b0014	chaperone Hsp70, co-chaperone with DnaJ	COG0443	O	Molecular chaperone	N	N	N
EC958_0147	dnaJ	148071	149183	+	1112	97	1482	0.0872302	0.399345	2.30521e-09	23.9542	2.30359e-49	99.47	b0015	chaperone Hsp40, co-chaperone with DnaK	COG0484	O	DnaJ-class molecular chaperone with C-terminal Zn finger domain	N	N	N
EC958_0148	hokC	149305	149439	-	134	15	388	0.11194	0.597273	8.24117e-12	31.8434	1.37719e-06	100	b4412	toxic membrane protein, small	NA	NA	NA	N	N	N
EC958_0149	0149	150071	150814	+	743	158	2495	0.212651	0.960077	8.78738e-22	62.2019	3.17715e-33	31.3	b2408	-	NA	NA	NA	N	N	N
EC958_0150	0150	150853	152328	+	1475	425	12961	0.288136	0.995295	2.9487e-29	84.1071	3.05635e-65	30.38	b3801	-	COG3119	P	Arylsulfatase A and related enzymes	N	N	N
EC958_0151	0151	152475	153716	+	1241	381	12527	0.30701	0.997332	3.98743e-31	89.5246	5.2492e-55	25.64	b0022	-	NA	NA	NA	N	N	N
EC958_0152	nhaA	153969	155117	+	1148	149	3218	0.129791	0.713625	1.40757e-13	37.3883	6.13488e-51	98.45	b0019	sodium-proton antiporter	COG3004	P	Na+/H+ antiporter	N	N	N
EC958_0153	nhaR	155201	156082	+	881	98	2612	0.111237	0.592164	9.67397e-12	31.6228	2.92468e-39	99.33	b0020	DNA-binding transcriptional activator	COG0583	K	Transcriptional regulator	N	N	N
EC958_0154	0154	156158	158179	-	2021	267	6274	0.132113	0.726802	8.29017e-14	38.1022	4.01601e-89	24.14	b3878	-	COG1501	G	Alpha-glucosidases, family 31 of glycosyl hydrolases	N	N	N
EC958_0155	0155	158225	159580	-	1355	209	4441	0.154244	0.830382	5.33632e-16	44.8398	5.41833e-60	28.94	b3657	-	COG2211	G	Na+/melibiose symporter and related transporters	N	N	N
EC958_0156	rpsT	159987	160154	-	167	7	37	0.0419162	0.0640924	7.07261e-05	8.16693	4.9615e-08	100	b0023	30S ribosomal subunit protein S20	COG0268	J	Ribosomal protein S20	N	N	N
EC958_0157	ribF	160633	161502	+	869	0	0	0	0	1	-173.929	9.79363e-39	100	b0025	bifunctional riboflavin kinase/FAD synthetase	COG0196	H	FAD synthase	Y	Y	Y
EC958_0158	ileS	161563	164361	+	2798	2	2	0.000714796	5.43417e-09	0.849616	-22.4995	4.15635e-123	99.25	b0026	isoleucyl-tRNA synthetase	COG0060	J	Isoleucyl-tRNA synthetase	Y	N	Y
EC958_0159	lspA	164379	164855	+	476	0	0	0	0	1	-173.929	1.51464e-21	98.17	b0027	prolipoprotein signal peptidase (signal peptidase II)	COG0597	MU	Lipoprotein signal peptidase	Y	Y	Y
EC958_0160	fkpB	164981	165412	+	431	33	589	0.0765661	0.308013	2.62204e-08	20.4404	1.40785e-19	100	b0028	FKBP-type peptidyl-prolyl cis-trans isomerase (rotamase)	COG1047	O	FKBP-type peptidyl-prolyl cis-trans isomerases 2	N	N	N
EC958_0161	ispH	165432	166364	+	932	2	4	0.00214592	5.99281e-07	0.61308	-16.8454	1.71948e-41	100	b0029	4-hydroxy-3-methylbut-2-enyl diphosphate reductase, 4Fe-4S protein	COG0761	IM	Penicillin tolerance protein	Y	Y	Y
EC958_0162	rihC	166448	167344	+	896	83	1747	0.0926339	0.445144	6.72436e-10	25.7061	6.45647e-40	97.03	b0030	ribonucleoside hydrolase 3	COG1957	F	Inosine-uridine nucleoside N-ribohydrolase	N	N	N
EC958_0163	0163	167385	167732	+	347	39	837	0.112392	0.600535	7.4348e-12	31.9851	6.64693e-16	28.7	b3103	-	COG3152	S	Predicted membrane protein	N	N	N
EC958_0164	dapB	167911	168714	+	803	0	0	0	0	1	-173.929	7.54584e-36	99.63	b0031	dihydrodipicolinate reductase	COG0289	E	Dihydrodipicolinate reductase	Y	Y	N
EC958_0165	carA	169188	170318	+	1130	87	1907	0.0769912	0.311631	2.37988e-08	20.5821	3.75929e-50	98.95	b0032	carbamoyl phosphate synthetase small subunit, glutamine amidotransferase	COG0505	EF	Carbamoylphosphate synthase small subunit	N	N	N
EC958_0166	carB	170354	173557	+	3203	327	6701	0.102092	0.52248	7.78324e-11	28.7341	8.02564e-141	99.53	b0033	carbamoyl-phosphate synthase large subunit	COG0458	EF	Carbamoylphosphate synthase large subunit (split gene in MJ)	N	N	N
EC958_0167	0167	173583	173783	-	200	34	716	0.17	0.882404	1.4692e-17	49.5744	1.78744e-09	41.03	b1902	-	NA	NA	NA	N	N	N
EC958_0168	caiF	173836	174213	+	377	105	2895	0.278515	0.993744	2.64408e-28	81.3379	3.23933e-17	99.24	b0034	DNA-binding transcriptional activator	NA	NA	NA	N	N	N
EC958_0169	caiE	174350	174922	-	572	64	1358	0.111888	0.596895	8.33981e-12	31.827	9.58034e-26	97.45	b0035	stimulator of CaiD and CaiB enzyme activities	COG0663	R	Carbonic anhydrases/acetyltransferases, isoleucine patch superfamily	N	N	N
EC958_0170	caiD	174946	175821	-	875	81	1546	0.0925714	0.444619	6.82086e-10	25.6859	5.35193e-39	99.62	b0036	carnitinyl-CoA dehydratase	COG1024	I	Enoyl-CoA hydratase/carnithine racemase	N	N	N
EC958_0171	caiC	175840	177375	-	1535	183	5436	0.119218	0.647881	1.56801e-12	34.1169	7.25894e-68	97.1	b0037	probable crotonobetaine/carnitine-CoA ligase	COG0318	IQ	Acyl-CoA synthetases (AMP-forming)/AMP-acid ligases II	N	N	N
EC958_0172	caiB	177466	178665	-	1199	125	2737	0.104254	0.539463	4.75455e-11	29.4201	3.60682e-53	98.77	b0038	crotonobetainyl CoA:carnitine CoA transferase	COG1804	C	Predicted acyl-CoA transferases/carnitine dehydratase	N	N	N
EC958_0173	caiA	178812	179936	-	1124	120	2810	0.106762	0.558784	2.68394e-11	30.2135	6.87921e-50	100	b0039	crotonobetaine reductase subunit II, FAD-binding	COG1960	I	Acyl-CoA dehydrogenases	N	N	N
EC958_0174	caiT	179985	181481	-	1496	212	7603	0.141711	0.776505	9.29299e-15	41.0386	3.68713e-66	99.8	b0040	predicted transporter	COG1292	M	Choline-glycine betaine transporter	N	N	N
EC958_0175	fixA	181972	182724	+	752	85	2965	0.113032	0.605131	6.4254e-12	32.1856	1.28348e-33	99.61	b0041	predicted electron transfer flavoprotein subunit, required for anaerobic carnitine reduction	COG2086	C	Electron transfer flavoprotein, beta subunit	N	N	N
EC958_0176	fixB	182757	183680	+	923	81	1666	0.0877573	0.403845	2.04418e-09	24.1258	4.25644e-41	98.72	b0042	predicted electron transfer flavoprotein, NAD/FAD-binding domain and ETFP adenine nucleotide-binding domain-like protein	COG2025	C	Electron transfer flavoprotein, alpha subunit	N	N	N
EC958_0177	fixC	183749	185017	+	1268	101	1975	0.079653	0.334377	1.29714e-08	21.4661	3.46055e-56	99.77	b0043	predicted oxidoreductase with FAD/NAD(P)-binding domain	COG0644	C	Dehydrogenases (flavoproteins)	N	N	N
EC958_0178	fixX	185032	185301	+	269	31	393	0.115242	0.620752	3.8824e-12	32.877	1.71495e-12	98.95	b0044	predicted 4Fe-4S ferredoxin-type protein	COG2440	C	Ferredoxin-like protein	N	N	N
EC958_0179	yaaU	185378	186691	+	1313	117	2755	0.0891089	0.415357	1.50206e-09	24.5652	3.72303e-58	99.55	b0045	predicted transporter	COG2271	G	Sugar phosphate permease	N	N	N
EC958_0180	kefF	186874	187329	+	455	48	1178	0.105495	0.549076	3.58289e-11	29.813	1.25553e-20	100	b0046	flavoprotein subunit for the KefC potassium efflux system	COG2249	R	Putative NADPH-quinone reductase (modulator of drug activity B)	N	N	N
EC958_0181	kefC	187340	189184	+	1844	150	3343	0.0813449	0.348886	8.81979e-09	22.0251	2.216e-81	99.35	b0047	potassium:proton antiporter	COG0475	P	Kef-type K+ transport systems, membrane components	N	N	N
EC958_0182	folA	189394	189855	+	461	44	673	0.0954447	0.468577	3.54273e-10	26.6108	6.86108e-21	100	b0048	dihydrofolate reductase	COG0262	H	Dihydrofolate reductase	N	Y	Y
EC958_0183	0183	189959	190174	+	215	17	529	0.0790698	0.329382	1.48162e-08	21.2728	3.94592e-10	24.64	b1765	-	COG5302	R	Post-segregation antitoxin (ccd killing mechanism protein) encoded by the F plasmid	N	N	N
EC958_0184	0184	190195	190461	+	266	22	543	0.0827068	0.360577	6.46562e-09	22.4736	2.31989e-12	30.51	b0730	-	NA	NA	NA	N	N	N
EC958_0185	apaH	190506	191336	-	830	55	842	0.0662651	0.222708	2.7455e-07	16.9575	4.97461e-37	98.58	b0049	diadenosine tetraphosphatase	COG0639	T	Diadenosine tetraphosphatase and related serine/threonine protein phosphatases	N	N	N
EC958_0186	apaG	191361	191720	-	359	35	746	0.097493	0.485434	2.22083e-10	27.2674	1.98497e-16	100	b0050	protein associated with Co2+ and Mg2+ efflux	COG2967	P	Uncharacterized protein affecting Mg2+/Co2+ transport	N	N	N
EC958_0187	rsmA	191741	192544	-	803	61	1022	0.0759651	0.302906	3.0071e-08	20.2399	7.54584e-36	99.27	b0051	16S rRNA dimethyladenosine transferase, SAM-dependent	COG0030	J	Dimethyladenosine transferase (rRNA methylation)	N	N	N
EC958_0188	pdxA	192559	193530	-	971	84	1734	0.0865088	0.393178	2.71737e-09	23.7189	3.38518e-43	97.57	b0052	4-hydroxy-L-threonine phosphate dehydrogenase, NAD-dependent	COG1995	H	Pyridoxal phosphate biosynthesis protein	N	N	N
EC958_0189	surA	193548	194816	-	1268	94	595	0.0741325	0.287403	4.56679e-08	19.6264	3.46055e-56	100	b0053	peptidyl-prolyl cis-trans isomerase (PPIase)	COG0760	O	Parvulin-like peptidyl-prolyl isomerase	N	N	N
EC958_0190	lptD	194887	197190	-	2303	8	65	0.00347373	4.59876e-06	0.45294	-14.1783	1.85969e-101	99.09	b0054	LPS assembly OM complex LptDE, beta-barrel component	COG1452	M	Organic solvent tolerance protein OstA	Y	Y	Y
EC958_0191	djlA	197496	198293	+	797	74	1808	0.0928482	0.446941	6.40378e-10	25.7752	1.38083e-35	99.26	b0055	DnaJ-like protein, membrane anchored	COG1076	O	DnaJ-domain-containing proteins 1	N	N	N
EC958_0192	rluA	198461	199102	-	641	78	2196	0.121685	0.664058	8.9353e-13	34.8832	9.1918e-29	99.54	b0058	pseudouridine synthase for 23S rRNA (position 746) and tRNAphe(position 32)	COG0564	J	Pseudouridylate synthases, 23S RNA-specific	N	N	N
EC958_0193	rapA	199132	202020	-	2888	339	8273	0.117382	0.635515	2.38309e-12	33.5451	4.81079e-127	99.9	b0059	RNA polymerase-associated helicase protein (ATPase and RNA polymerase recycling factor)	COG0553	KL	Superfamily II DNA/RNA helicases, SNF2 family	N	N	N
EC958_0194	polB	202203	204536	-	2333	236	5427	0.101157	0.51505	9.63141e-11	28.4369	9.06306e-103	98.72	b0060	DNA polymerase II	COG0417	L	DNA polymerase elongation subunit (family B)	N	N	N
EC958_0195	araD	204629	205306	-	677	96	2519	0.141802	0.776939	9.10251e-15	41.0663	2.44795e-30	98.7	b0061	L-ribulose-5-phosphate 4-epimerase	COG0235	G	Ribulose-5-phosphate 4-epimerase and related epimerases and aldolases	N	N	N
EC958_0196	araA	205439	206923	-	1484	149	3499	0.100404	0.509025	1.14353e-10	28.1971	1.23468e-65	99.6	b0062	L-arabinose isomerase	COG2160	G	L-arabinose isomerase	N	N	N
EC958_0197	araB	206952	208634	-	1682	171	4635	0.101665	0.519091	8.57928e-11	28.5983	2.69937e-74	97.88	b0063	L-ribulokinase	COG1069	C	Ribulose kinase	N	N	N
EC958_0198	araC	208991	209818	+	827	130	2959	0.157195	0.841379	2.72288e-16	45.7301	6.72938e-37	98.93	b0064	DNA-binding transcriptional dual regulator	COG2207	K	AraC-type DNA-binding domain-containing proteins	N	N	N
EC958_0199	0199	209974	210117	+	143	13	314	0.0909091	0.430617	9.96413e-10	25.1487	5.56346e-07	28.12	b4590	-	NA	NA	NA	N	N	N
EC958_0200	0200	210231	211274	+	1043	214	4960	0.205177	0.951364	4.82967e-21	60.0056	2.40096e-46	38.24	b3752	-	COG0524	G	Sugar kinases, ribokinase family	N	N	N
EC958_0201	0201	211318	212223	+	905	277	6872	0.306077	0.997256	4.93274e-31	89.2572	2.60823e-40	27.04	b0268	-	COG0329	EM	Dihydrodipicolinate synthase/N-acetylneuraminate lyase	N	N	N
EC958_0202	0202	212296	213231	+	935	225	5825	0.240642	0.981418	1.4871e-24	70.3773	1.2711e-41	23.61	b0161	-	COG3181	S	Uncharacterized protein conserved in bacteria	N	N	N
EC958_0203	0203	213298	213717	+	419	54	591	0.128878	0.708322	1.73316e-13	37.1072	4.71437e-19	26.05	b0153	-	NA	NA	NA	N	N	N
EC958_0204	0204	213745	215214	+	1469	467	13031	0.317903	0.998086	3.32746e-32	92.6427	5.5929e-65	22.78	b3750	-	COG3333	S	Uncharacterized protein conserved in bacteria	N	N	N
EC958_0205	yabI	215416	216162	+	746	98	2431	0.131367	0.72262	9.82614e-14	37.8732	2.34867e-33	98.43	b0065	inner membrane protein, SNARE_assoc family	COG0586	S	Uncharacterized membrane-associated protein	N	N	N
EC958_0206	thiQ	216294	216974	-	680	67	1655	0.0985294	0.493884	1.75346e-10	27.5988	1.80961e-30	95.69	b0066	thiamin transporter subunit	COG3840	H	ABC-type thiamine transport system, ATPase component	N	N	N
EC958_0207	thiP	216976	218568	-	1592	180	3925	0.113065	0.60537	6.37664e-12	32.1961	2.33216e-70	97.57	b0067	fused thiamin transporter subunits of ABC superfamily: membrane components	COG1178	P	ABC-type Fe3+ transport system, permease component	N	N	N
EC958_0208	thiB	218562	219527	-	965	85	1472	0.0880829	0.406622	1.89793e-09	24.2318	6.19462e-43	97.86	b0068	thiamin transporter subunit	COG4143	H	ABC-type thiamine transport system, periplasmic component	N	N	N
EC958_0209	sgrR	219709	221346	-	1637	168	4120	0.102627	0.52671	6.88953e-11	28.9041	2.50906e-72	97.28	b0069	transcriptional DNA-binding transcriptional activator of sgrS sRNA	COG4533	R	ABC-type uncharacterized transport system, periplasmic component	N	N	N
EC958_0210	sgrT	221453	221566	+	113	16	367	0.141593	0.775938	9.54707e-15	41.0026	1.14159e-05	85.71	b4662	Inhibitor of glucose uptake	NA	NA	NA	N	N	N
EC958_0211	leuD	221691	222278	-	587	61	1717	0.103918	0.536848	5.13229e-11	29.3139	2.11494e-26	99	b0071	3-isopropylmalate dehydratase small subunit	COG0066	E	3-isopropylmalate dehydratase small subunit	N	N	N
EC958_0212	leuC	222307	223689	-	1382	132	3741	0.0955137	0.469148	3.48738e-10	26.6329	3.57204e-61	100	b0072	3-isopropylmalate dehydratase large subunit	COG0065	E	3-isopropylmalate dehydratase large subunit	N	N	N
EC958_0213	leuB	223710	224783	-	1073	93	1736	0.0866729	0.394582	2.61756e-09	23.7725	1.17009e-47	99.72	b0073	3-isopropylmalate dehydrogenase	COG0473	CE	Isocitrate/isopropylmalate dehydrogenase	N	N	N
EC958_0214	leuA	224801	226354	-	1553	199	4810	0.128139	0.703974	2.05131e-13	36.8794	1.18461e-68	99.62	b0074	2-isopropylmalate synthase	COG0119	E	Isopropylmalate/homocitrate/citramalate synthases	N	N	N
EC958_0215	leuO	227208	228134	+	926	283	6819	0.305616	0.997217	5.48042e-31	89.1249	3.14651e-41	99.36	b0076	DNA-binding transcriptional activator	COG0583	K	Transcriptional regulator	N	N	N
EC958_0216	0216	228188	228292	-	104	6	158	0.0576923	0.157862	1.93852e-06	13.9713	2.82592e-05	25	b3184	-	NA	NA	NA	N	N	N
EC958_0217	ilvI	228470	230176	+	1706	268	6267	0.157093	0.841009	2.78698e-16	45.6993	2.4073e-75	98.78	b0077	acetolactate synthase III, large subunit	COG0028	EH	Thiamine pyrophosphate-requiring enzymes [acetolactate synthase, pyruvate dehydrogenase (cytochrome), glyoxylate carboligase, phosphonopyruvate decarboxylase]	N	N	N
EC958_0218	ilvH	230167	230670	+	503	67	2544	0.133201	0.73282	6.46896e-14	38.4363	9.9853e-23	99.39	b0078	acetolactate synthase III, thiamin-dependent, small subunit	COG0440	E	Acetolactate synthase, small (regulatory) subunit	N	N	N
EC958_0219	0219	230740	230853	+	113	9	180	0.079646	0.334317	1.2992e-08	21.4637	1.14159e-05	37.5	b2481	-	NA	NA	NA	N	N	N
EC958_0220	fruR	230868	231854	+	986	119	2098	0.12069	0.657592	1.12112e-12	34.5743	7.47307e-44	99.7	b0080	DNA-binding transcriptional dual regulator	COG1609	K	Transcriptional regulators	N	N	N
EC958_0221	mraZ	232474	232914	+	440	25	704	0.0568182	0.151704	2.36605e-06	13.6614	5.68733e-20	99.34	b0081	conserved protein, MraZ family	COG2001	S	Uncharacterized protein conserved in bacteria	N	N	N
EC958_0222	rsmH	232934	233857	+	923	49	1000	0.0530878	0.126559	5.53861e-06	12.3254	4.25644e-41	100	b0082	16S rRNA m(4)C1402 methyltranserfase, SAM-dependent	COG0275	M	Predicted S-adenosylmethionine-dependent methyltransferase involved in cell envelope biogenesis	N	N	N
EC958_0223	ftsL	233872	234219	+	347	9	131	0.0259366	0.0132549	0.00270291	1.53826	6.64693e-16	100	b0083	membrane bound cell division protein at septum containing leucine zipper motif	COG3116	D	Cell division protein	N	Y	Y
EC958_0224	ftsI	234253	236001	+	1748	5	178	0.00286041	2.02672e-06	0.520919	-15.2751	3.50348e-77	99.66	b0084	transpeptidase involved in septal peptidoglycan synthesis (penicillin-binding protein 3)	COG0768	M	Cell division protein FtsI/penicillin-binding protein 2	Y	Y	Y
EC958_0225	murE	236006	237475	+	1469	5	31	0.00340368	4.22088e-06	0.460233	-14.2949	5.5929e-65	98.38	b0085	UDP-N-acetylmuramoyl-L-alanyl-D-glutamate:meso- diaminopimelate ligase	COG0769	M	UDP-N-acetylmuramyl tripeptide synthase	Y	Y	Y
EC958_0226	murF	237490	238830	+	1340	4	26	0.00298507	2.42704e-06	0.506321	-15.0369	2.45441e-59	98.67	b0086	UDP-N-acetylmuramoyl-tripeptide:D-alanyl-D- alanine ligase	COG0770	M	UDP-N-acetylmuramyl pentapeptide synthase	Y	Y	Y
EC958_0227	mraY	238842	239906	+	1064	2	36	0.0018797	3.41079e-07	0.651445	-17.5521	2.89647e-47	100	b0087	phospho-N-acetylmuramoyl-pentapeptide transferase	COG0472	M	UDP-N-acetylmuramyl pentapeptide phosphotransferase/UDP-N-acetylglucosamine-1-phosphate transferase	Y	Y	Y
EC958_0228	murD	239927	241225	+	1298	0	0	0	0	1	-173.929	1.68647e-57	99.54	b0088	UDP-N-acetylmuramoyl-L-alanine:D-glutamate ligase	COG0771	M	UDP-N-acetylmuramoylalanine-D-glutamate ligase	Y	Y	Y
EC958_0229	ftsW	241243	242469	+	1226	8	64	0.00652529	6.34755e-05	0.225884	-10.3314	2.3778e-54	100	b0089	integral membrane protein involved in stabilizing FstZ ring during cell division	COG0772	D	Bacterial cell division membrane protein	Y	Y	Y
EC958_0230	murG	242508	243533	+	1025	3	108	0.00292683	2.23319e-06	0.51309	-15.1471	1.47124e-45	99.14	b0090	N-acetylglucosaminyl transferase	COG0707	M	UDP-N-acetylglucosamine:LPS N-acetylglucosamine transferase	Y	Y	Y
EC958_0231	murC	243605	245062	+	1457	1	1	0.000686342	4.56367e-09	0.855146	-22.7018	1.87285e-64	99.8	b0091	UDP-N-acetylmuramate:L-alanine ligase	COG0773	M	UDP-N-acetylmuramate-alanine ligase	Y	Y	Y
EC958_0232	ddlB	245073	245975	+	902	47	981	0.0521064	0.12027	6.92738e-06	11.9702	3.52827e-40	98.69	b0092	D-alanine:D-alanine ligase	COG1181	M	D-alanine-D-alanine ligase and related ATP-grasp enzymes	N	N	N
EC958_0233	ftsQ	245995	246807	+	812	7	198	0.00862069	0.000197562	0.140089	-8.42962	3.0483e-36	99.64	b0093	membrane anchored protein involved in growth of wall at septum	COG1589	M	Cell division septal protein	Y	Y	Y
EC958_0234	ftsA	246822	248066	+	1244	2	2	0.00160772	1.75159e-07	0.69312	-18.3745	3.8804e-55	100	b0094	ATP-binding cell division protein involved in recruitment of FtsK to Z ring	COG0849	D	Actin-like ATPase involved in cell division	Y	Y	Y
EC958_0235	ftsZ	248145	249278	+	1133	1	1	0.000882613	1.3442e-08	0.817723	-21.4437	2.779e-50	100	b0095	GTP-binding tubulin-like cell division protein	COG0206	D	Cell division GTPase	Y	Y	Y
EC958_0236	lpxC	249397	250296	+	899	5	14	0.00556174	3.28376e-05	0.28138	-11.3578	4.77286e-40	100	b0096	UDP-3-O-acyl N-acetylglucosamine deacetylase	COG0774	M	UDP-3-O-acyl-N-acetylglucosamine deacetylase	Y	Y	Y
EC958_0237	0237	250321	250437	-	116	3	58	0.0258621	0.0131219	0.00274923	1.50428	8.43906e-06	36.67	b2521	-	NA	NA	NA	N	N	N
EC958_0238	secM	250469	251038	+	569	13	153	0.0228471	0.0084492	0.00546695	0.0936773	1.29598e-25	98.24	b0097	regulator of secA translation	NA	NA	NA	N	Y	Y
EC958_0239	secA	251118	253805	+	2687	28	475	0.0104205	0.00042293	0.0929367	-7.03366	2.97662e-118	99.78	b0098	preprotein translocase subunit, ATPase	COG0653	U	Preprotein translocase subunit SecA (ATPase, RNA helicase)	Y	Y	Y
EC958_0240	mutT	253883	254263	+	380	37	695	0.0973684	0.484414	2.28483e-10	27.2275	2.39463e-17	97.67	b0099	nucleoside triphosphate pyrophosphohydrolase, marked preference for dGTP	COG1051	F	ADP-ribose pyrophosphatase	N	N	N
EC958_0241	yacG	254369	254548	-	179	7	86	0.0391061	0.0517887	0.000134221	7.07323	1.48165e-08	100	b0101	DNA gyrase inhibitor	COG3024	S	Uncharacterized protein conserved in bacteria	N	N	N
EC958_0242	yacF	254576	255301	-	725	62	1427	0.0855172	0.384689	3.40663e-09	23.3951	1.94687e-32	99.6	b0102	conserved protein	COG4582	S	Uncharacterized protein conserved in bacteria	N	N	N
EC958_0243	coaE	255319	255921	-	602	6	104	0.00996678	0.000354064	0.103067	-7.36988	4.66891e-27	100	b0103	dephospho-CoA kinase	COG0237	H	Dephospho-CoA kinase	Y	N	N
EC958_0244	guaC	256164	257189	+	1025	109	2894	0.106341	0.555577	2.95372e-11	30.0808	1.47124e-45	99.71	b0104	GMP reductase	COG0516	F	IMP dehydrogenase/GMP reductase	N	N	N
EC958_0245	hofC	257242	258426	-	1184	121	2815	0.102196	0.523305	7.60058e-11	28.7672	1.63383e-52	96.5	b0106	assembly protein in type IV pilin biogenesis, transmembrane protein	COG1459	NU	Type II secretory pathway, component PulF	N	N	N
EC958_0246	hofB	258680	259801	-	1121	115	2520	0.102587	0.526396	6.9523e-11	28.8914	9.30583e-50	98.15	b0107	conserved protein with nucleoside triphosphate hydrolase domain	COG2804	NU	Type II secretory pathway, ATPase PulE/Tfp pilus assembly pathway, ATPase PilB	N	N	N
EC958_0247	ppdD	259829	260251	-	422	47	1149	0.111374	0.593164	9.37609e-12	31.6658	3.48504e-19	99.32	b0108	predicted major pilin subunit	COG4969	NU	Tfp pilus assembly protein, major pilin PilA	N	N	N
EC958_0248	nadC	260473	261348	-	875	69	1192	0.0788571	0.327563	1.55521e-08	21.2023	5.35193e-39	99.66	b0109	quinolinate phosphoribosyltransferase	COG0157	H	Nicotinate-nucleotide pyrophosphorylase	N	N	N
EC958_0249	ampD	261454	261987	+	533	48	1306	0.0900563	0.423399	1.21027e-09	24.8726	4.86626e-24	97.81	b0110	1,6-anhydro-N-acetylmuramyl-L-alanine amidase, Zn-dependent; murein amidase	COG3023	V	Negative regulator of beta-lactamase expression	N	N	N
EC958_0250	ampE	262002	262838	+	836	68	1439	0.0813397	0.348841	8.83023e-09	22.0234	2.71848e-37	98.94	b0111	predicted inner membrane protein	COG3725	V	Membrane protein required for beta-lactamase induction	N	N	N
EC958_0251	aroP	262899	264251	-	1352	142	2968	0.10503	0.545486	3.98353e-11	29.6659	7.32962e-60	99.56	b0112	aromatic amino acid transporter	COG1113	E	Gamma-aminobutyrate permease and related permeases	N	N	N
EC958_0252	0252	264797	266560	+	1763	299	6651	0.169597	0.881268	1.61049e-17	49.454	7.73422e-78	58.58	b3442	-	COG3157	S	Hemolysin-coregulated protein (uncharacterized)	N	N	N
EC958_0253	0253	267229	267501	+	272	49	1860	0.180147	0.90806	1.45328e-18	52.6012	1.26775e-12	32.65	b2265	-	NA	NA	NA	N	N	N
EC958_0254	0254	267824	267862	+	38	11	116	0.289474	0.995479	2.17338e-29	84.4918	0.0217733	53.85	b0958	-	NA	NA	NA	N	N	N
EC958_0255	pdhR	268336	269082	+	746	45	1013	0.0603217	0.176938	1.06442e-06	14.8972	2.34867e-33	100	b0113	DNA-binding transcriptional dual regulator	COG2186	K	Transcriptional regulators	N	N	N
EC958_0256	aceE	269261	271906	+	2645	107	544	0.0404537	0.0575088	9.87167e-05	7.60059	2.04529e-116	100	b0114	pyruvate dehydrogenase, decarboxylase component E1, thiamin-binding	COG2609	C	Pyruvate dehydrogenase complex, dehydrogenase (E1) component	N	N	N
EC958_0257	aceF	271939	273813	+	1874	53	239	0.0282818	0.0178947	0.00158351	2.58828	1.07995e-82	99.84	b0115	pyruvate dehydrogenase, dihydrolipoyltransacetylase component E2	COG0508	C	Pyruvate/2-oxoglutarate dehydrogenase complex, dihydrolipoamide acyltransferase (E2) component, and related enzymes	N	N	N
EC958_0258	lpd	274039	275445	+	1406	7	53	0.00497866	2.07386e-05	0.321386	-12.0463	3.18555e-62	100	b0116	lipoamide dehydrogenase, E3 component is part of three enzyme complexes	COG1249	C	Pyruvate/2-oxoglutarate dehydrogenase complex, dihydrolipoamide dehydrogenase (E3) component, and related enzymes	Y	N	N
EC958_0259	yacH	275534	277279	-	1745	177	4631	0.101433	0.517245	9.04534e-11	28.5245	4.73932e-77	86.43	b0117	predicted protein	COG4372	S	Uncharacterized protein conserved in bacteria with the myosin-like domain	N	N	N
EC958_0260	acnB	277652	280231	+	2579	115	599	0.0445909	0.077129	3.84355e-05	9.18791	1.57587e-113	99.65	b0118	bifunctional aconitate hydratase 2/2-methylisocitrate dehydratase	COG1049	C	Aconitase B	N	N	N
EC958_0261	yacL	280424	280768	+	344	47	1400	0.136628	0.75113	2.96136e-14	39.4864	8.99161e-16	100	b0119	conserved protein	COG3112	S	Uncharacterized protein conserved in bacteria	N	N	N
EC958_0262	speD	280824	281600	-	776	131	2831	0.168814	0.879034	1.92519e-17	49.2197	1.14461e-34	99.24	b0120	S-adenosylmethionine decarboxylase	COG1586	E	S-adenosylmethionine decarboxylase	N	N	N
EC958_0263	speE	281634	282482	-	848	98	2033	0.115566	0.623013	3.60561e-12	32.9784	8.1182e-38	99.65	b0121	spermidine synthase (putrescine aminopropyltransferase)	COG0421	E	Spermidine synthase	N	N	N
EC958_0264	yacC	282606	282935	-	329	25	629	0.0759878	0.303099	2.99157e-08	20.2474	4.07305e-15	100	b0122	conserved protein, PulS_OutS family	NA	NA	NA	N	N	N
EC958_0265	cueO	283080	284654	+	1574	161	3401	0.102287	0.524027	7.44414e-11	28.7962	1.42909e-69	98.65	b0123	multicopper oxidase (laccase)	COG2132	Q	Putative multicopper oxidases	N	N	N
EC958_0266	gcd	284719	287091	-	2372	288	8180	0.121417	0.662322	9.49904e-13	34.8	1.78427e-104	99.37	b0124	glucose dehydrogenase	COG4993	G	Glucose dehydrogenase	N	N	N
EC958_0267	hpt	287315	287833	+	518	62	1111	0.119691	0.651022	1.40775e-12	34.264	2.20434e-23	100	b0125	hypoxanthine phosphoribosyltransferase	COG0634	F	Hypoxanthine-guanine phosphoribosyltransferase	N	N	N
EC958_0268	can	287892	288536	-	644	4	36	0.00621118	5.18152e-05	0.242653	-10.6528	6.79491e-29	100	b0126	carbonic anhydrase	COG0288	P	Carbonic anhydrase	Y	Y	Y
EC958_0269	yadG	288663	289571	+	908	82	1794	0.0903084	0.425535	1.14267e-09	24.9542	1.9281e-40	100	b0127	predicted transporter subunit: ATP-binding component of ABC superfamily	COG1131	V	ABC-type multidrug transport system, ATPase component	N	N	N
EC958_0270	yadH	289589	290338	+	749	85	2022	0.113485	0.608363	5.79525e-12	32.3274	1.73622e-33	100	b0128	predicted transporter subunit: membrane component of ABC superfamily	COG1682	GM	ABC-type polysaccharide/polyol phosphate export systems, permease component	N	N	N
EC958_0271	yadI	290461	290883	+	422	40	1056	0.0947867	0.463121	4.11611e-10	26.3994	3.48504e-19	98.63	b0129	predicted PTS Enzyme IIA	COG2893	G	Phosphotransferase system, mannose/fructose-specific component IIA	N	N	N
EC958_0272	yadE	290965	292176	+	1211	150	3986	0.123865	0.67793	5.43602e-13	35.5588	1.07711e-53	97.31	b0130	predicted polysaccharide deacetylase lipoprotein	COG0726	G	Predicted xylanase/chitin deacetylase	N	N	N
EC958_0273	panD	292198	292560	-	362	20	329	0.0552486	0.140894	3.38406e-06	13.1019	1.46736e-16	100	b0131	aspartate 1-decarboxylase	COG0853	H	Aspartate 1-decarboxylase	N	N	N
EC958_0274	yadD	292852	293754	+	902	115	3870	0.127494	0.700145	2.37608e-13	36.6806	3.52827e-40	90.52	b0132	predicted transposase	COG5464	S	Uncharacterized conserved protein	N	N	N
EC958_0275	yadD	293877	294020	+	143	28	660	0.195804	0.937982	4.09283e-20	57.2422	5.56346e-07	76.36	b0132	predicted transposase	NA	NA	NA	N	N	N
EC958_0276	panC	294120	294953	-	833	68	1106	0.0816327	0.351356	8.25973e-09	22.12	3.67741e-37	98.59	b0133	pantothenate synthetase	COG0414	H	Panthothenate synthetase	N	N	N
EC958_0277	panB	294983	295759	-	776	67	1453	0.0863402	0.391736	2.82382e-09	23.6639	1.14461e-34	97.73	b0134	3-methyl-2-oxobutanoate hydroxymethyltransferase	COG0413	H	Ketopantoate hydroxymethyltransferase	N	N	N
EC958_0278	yadC	295890	297125	-	1235	309	8627	0.250202	0.985808	1.68137e-25	73.1541	9.60565e-55	67.94	b0135	predicted fimbrial-like adhesin protein	COG3539	NU	P pilus assembly protein, pilin FimA	N	N	N
EC958_0279	yadK	297195	297773	-	578	125	1368	0.216263	0.963749	3.85703e-22	63.261	5.23537e-26	85.35	b0136	predicted fimbrial-like adhesin protein	COG3539	NU	P pilus assembly protein, pilin FimA	N	N	N
EC958_0280	yadL	297818	298402	-	584	172	4041	0.294521	0.996112	6.87717e-30	85.9419	2.86098e-26	97.5	b0137	predicted fimbrial-like adhesin protein	COG3539	NU	P pilus assembly protein, pilin FimA	N	N	N
EC958_0281	yadM	298435	298803	-	368	132	3760	0.358696	0.999463	3.0407e-36	104.272	8.01872e-17	91.41	b0138	predicted fimbrial-like adhesin protein	COG3539	NU	P pilus assembly protein, pilin FimA	N	N	N
EC958_0282	htrE	299024	301606	-	2582	836	26144	0.32378	0.998403	8.71405e-33	94.3226	1.16494e-113	97.34	b0139	predicted outer membrane usher protein	COG3188	NU	P pilus assembly protein, porin PapC	N	N	N
EC958_0283	ecpD	301659	302381	-	722	166	4136	0.229917	0.97498	1.71506e-23	67.2534	2.63363e-32	92.68	b0140	predicted periplasmic pilin chaperone	COG3121	NU	P pilus assembly protein, chaperone PapD	N	N	N
EC958_0284	yadN	302496	303062	-	566	155	1584	0.273852	0.992826	7.65582e-28	79.9938	1.75313e-25	90.72	b0141	predicted fimbrial-like adhesin protein	COG3539	NU	P pilus assembly protein, pilin FimA	N	N	N
EC958_0285	folK	303428	303889	-	461	14	190	0.0303688	0.0227967	0.000983946	3.49476	6.86108e-21	90.57	b0142	2-amino-4-hydroxy-6-hydroxymethyldihyropteridine pyrophosphokinase	COG0801	H	7,8-dihydro-6-hydroxymethylpterin-pyrophosphokinase	N	Y	Y
EC958_0286	pcnB	303904	305250	-	1346	106	1214	0.0787519	0.326662	1.59299e-08	21.1674	1.34127e-59	100	b0143	poly(A) polymerase I	COG0617	J	tRNA nucleotidyltransferase/poly(A) polymerase	N	N	N
EC958_0287	yadB	305361	306269	-	908	109	1892	0.120044	0.653353	1.29891e-12	34.3737	1.9281e-40	97.08	b0144	glutamyl-Q tRNA(Asp) synthetase	COG0008	J	Glutamyl- and glutaminyl-tRNA synthetases	N	N	N
EC958_0288	dksA	306324	306761	-	437	36	422	0.0823799	0.35777	6.96594e-09	22.3661	7.69351e-20	100	b0145	DNA-binding transcriptional regulator of rRNA transcription, DnaK suppressor protein	COG1734	T	DnaK suppressor protein	N	N	N
EC958_0289	sfsA	306957	307643	-	686	101	3601	0.14723	0.801711	2.64041e-15	42.7169	9.889e-31	99.15	b0146	predicted DNA-binding transcriptional regulator	COG1489	R	DNA-binding protein, stimulates sugar fermentation	N	N	N
EC958_0290	ligT	307676	308188	-	512	64	1282	0.125	0.684999	4.19618e-13	35.9101	4.03377e-23	99.43	b0147	2'-5' RNA ligase	COG1514	J	2'-5' RNA ligase	N	N	N
EC958_0291	hrpB	308280	310691	+	2411	279	6853	0.11572	0.624081	3.48154e-12	33.0264	3.51273e-106	97.16	b0148	predicted ATP-dependent helicase	COG1643	L	HrpA-like helicases	N	N	N
EC958_0292	mrcB	310803	313310	+	2507	306	6762	0.122058	0.666462	8.20615e-13	34.9991	2.22186e-110	99.17	b0149	fused glycosyl transferase and transpeptidase	COG0744	M	Membrane carboxypeptidase (penicillin-binding protein)	N	N	N
EC958_0293	0293	313669	314217	+	548	41	241	0.0748175	0.293184	3.90644e-08	19.856	1.07427e-24	29.9	b4314	-	COG3539	NU	P pilus assembly protein, pilin FimA	N	N	N
EC958_0294	0294	314332	314979	+	647	24	280	0.0370943	0.0438713	0.000212339	6.27516	5.02305e-29	37.04	b4316	-	COG3121	NU	P pilus assembly protein, chaperone PapD	N	N	N
EC958_0295	0295	315064	317523	+	2459	852	27011	0.346482	0.999211	4.92383e-35	100.798	2.7937e-108	40.17	b3144	-	COG3188	NU	P pilus assembly protein, porin PapC	N	N	N
EC958_0296	0296	317563	318555	+	992	298	8714	0.300403	0.996742	1.79856e-30	87.6304	4.08381e-44	35.51	b4314	-	COG3539	NU	P pilus assembly protein, pilin FimA	N	N	N
EC958_0297	0297	318639	318788	-	149	37	1183	0.248322	0.985031	2.58134e-25	72.6086	3.04027e-07	36.36	b3187	-	NA	NA	NA	N	N	N
EC958_0298	fhuA	318793	321024	+	2231	284	6452	0.127297	0.698967	2.48539e-13	36.6197	2.62203e-98	89.47	b0150	ferrichrome outer membrane transporter	COG1629	P	Outer membrane receptor proteins, mostly Fe transport	N	N	N
EC958_0299	fhuC	321094	321873	+	779	75	1614	0.0962773	0.475453	2.9302e-10	26.8779	8.46135e-35	98.87	b0151	iron-hydroxamate transporter subunit	COG1120	PH	ABC-type cobalamin/Fe3+-siderophores transport systems, ATPase components	N	N	N
EC958_0300	fhuD	321891	322763	+	872	95	1947	0.108945	0.57525	1.63147e-11	30.902	7.23981e-39	98.99	b0152	iron-hydroxamate transporter subunit	COG0614	P	ABC-type Fe3+-hydroxamate transport system, periplasmic component	N	N	N
EC958_0301	fhuB	322778	324742	+	1964	172	3733	0.0875764	0.402301	2.13027e-09	24.0669	1.25e-86	98.64	b0153	fused iron-hydroxamate transporter subunits of ABC superfamily: membrane components	COG0609	P	ABC-type Fe3+-siderophore transport system, permease component	N	N	N
EC958_0302	hemL	324795	326057	-	1262	9	105	0.00713154	9.13656e-05	0.196723	-9.74152	6.33254e-56	99.06	b0154	glutamate-1-semialdehyde aminotransferase (aminomutase)	COG0001	H	Glutamate-1-semialdehyde aminotransferase	Y	Y	Y
EC958_0303	clcA	326300	327703	+	1403	174	4949	0.12402	0.678904	5.24681e-13	35.6069	4.30924e-62	99.79	b0155	chloride channel, voltage-gated	COG0038	P	Chloride channel protein EriC	N	N	N
EC958_0304	erpA	327803	328129	+	326	0	0	0	0	1	-173.929	5.50981e-15	100	b0156	iron-sulfur cluster insertion protein	COG0316	S	Uncharacterized conserved protein	Y	Y	Y
EC958_0305	yadS	328194	328799	-	605	55	1088	0.0909091	0.430617	9.96413e-10	25.1487	3.45143e-27	100	b0157	inner membrane protein, UPF0126 family	COG2860	S	Predicted membrane protein	N	N	N
EC958_0306	btuF	328855	329637	-	782	68	1325	0.0869565	0.397007	2.45364e-09	23.865	6.25494e-35	100	b0158	vitamin B12 transporter subunit: periplasmic-binding component of ABC superfamily	COG0614	P	ABC-type Fe3+-hydroxamate transport system, periplasmic component	N	N	N
EC958_0307	mtn	329648	330328	-	680	46	214	0.0676471	0.233791	2.00346e-07	17.4308	1.80961e-30	100	b0159	5'-methylthioadenosine/S-adenosylhomocysteine nucleosidase	COG0775	F	Nucleoside phosphorylase	N	N	N
EC958_0308	dgt	330430	331929	+	1499	381	17470	0.254169	0.987323	6.80552e-26	74.3042	2.72566e-66	98.61	b0160	deoxyguanosine triphosphate triphosphohydrolase	COG0232	F	dGTP triphosphohydrolase	N	N	N
EC958_0309	degP	332077	333483	+	1406	176	4071	0.125178	0.686096	4.02947e-13	35.9651	3.18555e-62	99.37	b0161	serine endoprotease (protease Do), membrane-associated	COG0265	O	Trypsin-like serine proteases, typically periplasmic, contain C-terminal PDZ domain	N	N	N
EC958_0310	cdaR	333656	334795	+	1139	108	2538	0.09482	0.463397	4.08499e-10	26.4101	1.51864e-50	99.74	b0162	DNA-binding transcriptional regulator for gar and gud operons; carbohydrate diacid regulator	COG3835	KT	Sugar diacid utilization regulator	N	N	N
EC958_0311	yaeH	334867	335235	-	368	28	575	0.076087	0.30394	2.92473e-08	20.2805	8.01872e-17	100	b0163	conserved protein, UPF0325 family	NA	NA	NA	N	N	N
EC958_0312	dapD	335563	336369	-	806	7	26	0.00868486	0.000203573	0.138054	-8.37671	5.57816e-36	99.64	b0166	2,3,4,5-tetrahydropyridine-2-carboxylate N-succinyltransferase	COG2171	E	Tetrahydrodipicolinate N-succinyltransferase	Y	Y	N
EC958_0313	glnD	336418	339072	-	2654	93	1097	0.0350414	0.0365635	0.000339075	5.44628	8.26239e-117	99.44	b0167	uridylyltransferase	COG2844	O	UTP:GlnB (protein PII) uridylyltransferase	N	N	N
EC958_0314	map	339152	339928	-	776	10	165	0.0128866	0.000978059	0.052967	-5.34802	1.14461e-34	100	b0168	methionine aminopeptidase	COG0024	J	Methionine aminopeptidase	Y	Y	Y
EC958_0315	rpsB	340314	341021	+	707	2	5	0.00282885	1.93385e-06	0.52468	-15.3368	1.19299e-31	100	b0169	30S ribosomal subunit protein S2	COG0052	J	Ribosomal protein S2	Y	Y	Y
EC958_0316	tsf	341174	342007	+	833	2	19	0.00240096	9.65472e-07	0.578447	-16.2383	3.67741e-37	100	b0170	protein chain elongation factor EF-Ts	COG0264	J	Translation elongation factor Ts	Y	Y	Y
EC958_0317	pyrH	342172	342879	+	707	0	0	0	0	1	-173.929	1.19299e-31	100	b0171	uridylate kinase	COG0528	F	Uridylate kinase	Y	Y	Y
EC958_0318	frr	343047	343586	+	539	1	17	0.00185529	3.22606e-07	0.655081	-17.6213	2.65927e-24	99.46	b0172	ribosome recycling factor	COG0233	J	Ribosome recycling factor	Y	Y	Y
EC958_0319	dxr	343696	344874	+	1178	1	17	0.000848896	1.13725e-08	0.824033	-21.6395	2.98979e-52	99.75	b0173	1-deoxy-D-xylulose 5-phosphate reductoisomerase	COG0743	I	1-deoxy-D-xylulose 5-phosphate reductoisomerase	Y	Y	Y
EC958_0320	ispU	345078	345821	+	743	4	106	0.00538358	2.86941e-05	0.293044	-11.562	3.17715e-33	99.6	b0174	undecaprenyl pyrophosphate synthase	COG0020	I	Undecaprenyl pyrophosphate synthase	Y	Y	Y
EC958_0321	cdsA	345852	346691	+	839	2	42	0.00238379	9.36517e-07	0.580716	-16.2774	2.0096e-37	98.6	b0175	CDP-diglyceride synthase	COG0575	I	CDP-diglyceride synthetase	Y	Y	Y
EC958_0322	rseP	346721	348055	+	1334	55	399	0.0412294	0.0609523	8.27148e-05	7.90173	4.49139e-59	100	b0176	inner membrane zinc RIP metalloprotease; RpoE activator, by degrading RseA	COG0750	M	Predicted membrane-associated Zn-dependent proteases 1	N	Y	Y
EC958_0323	bamA	348103	350517	+	2414	3	27	0.00124275	5.82711e-08	0.753263	-19.7069	2.59674e-106	100	b0177	outer membrane protein assembly factor, forms pores; required for OM biogenesis; in BamABCD OM protein complex	COG4775	M	Outer membrane protein/protective antigen OMA87	Y	Y	Y
EC958_0324	skp	350657	351124	+	467	26	552	0.0556745	0.143795	3.07091e-06	13.2541	3.74938e-21	99.38	b0178	periplasmic chaperone	COG2825	M	Outer membrane protein	N	N	N
EC958_0325	lpxD	351146	352153	+	1007	0	0	0	0	1	-173.929	9.01536e-45	99.71	b0179	UDP-3-O-(3-hydroxymyristoyl)-glucosamine N-acyltransferase	COG1044	M	UDP-3-O-[3-hydroxymyristoyl] glucosamine N-acyltransferase	Y	Y	Y
EC958_0326	fabZ	352276	352713	+	437	1	1	0.00228833	7.87369e-07	0.593494	-16.499	7.69351e-20	99.34	b0180	(3R)-hydroxymyristol acyl carrier protein dehydratase	COG0764	I	3-hydroxymyristoyl/3-hydroxydecanoyl-(acyl carrier protein) dehydratases	Y	Y	Y
EC958_0327	lpxA	352735	353505	+	770	0	0	0	0	1	-173.929	2.09454e-34	99.62	b0181	UDP-N-acetylglucosamine acetyltransferase	COG1043	M	Acyl-[acyl carrier protein]--UDP-N-acetylglucosamine O-acyltransferase	Y	Y	Y
EC958_0328	lpxB	353523	354653	+	1130	4	38	0.00353982	4.97821e-06	0.446166	-14.0701	3.75929e-50	98.95	b0182	tetraacyldisaccharide-1-P synthase	COG0763	M	Lipid A disaccharide synthetase	Y	Y	Y
EC958_0329	rnhB	354668	355246	+	578	27	484	0.0467128	0.0883635	2.36936e-05	9.98546	5.23537e-26	98.99	b0183	ribonuclease HII, degrades RNA of DNA-RNA hybrids	COG0164	L	Ribonuclease HII	N	N	N
EC958_0330	dnaE	355301	358765	+	3464	2	2	0.000577367	2.16989e-09	0.876659	-23.5596	3.08064e-152	99.83	b0184	DNA polymerase III alpha subunit	COG0587	L	DNA polymerase III, alpha subunit	Y	Y	Y
EC958_0331	accA	358796	359737	+	941	1	7	0.0010627	2.98072e-08	0.784828	-20.5054	6.94619e-42	100	b0185	acetyl-CoA carboxylase, carboxytransferase, alpha subunit	COG0825	I	Acetyl-CoA carboxylase alpha subunit	Y	Y	Y
EC958_0332	ldcC	359853	361976	+	2123	171	3140	0.0805464	0.342035	1.05809e-08	21.7615	1.38814e-93	99.02	b0186	lysine decarboxylase 2, constitutive	COG1982	E	Arginine/lysine/ornithine decarboxylases	N	N	N
EC958_0333	yaeR	362051	362422	+	371	28	501	0.0754717	0.298721	3.36516e-08	20.075	5.92773e-17	98.45	b0187	predicted lyase	COG0346	E	Lactoylglutathione lyase and related lyases	N	N	N
EC958_0334	tilS	362505	363800	+	1295	5	70	0.003861	7.16975e-06	0.414662	-13.567	2.28137e-57	96.76	b0188	tRNA(Ile)-lysidine synthetase	COG0037	D	Predicted ATPase of the PP-loop superfamily implicated in cell cycle control	Y	Y	Y
EC958_0335	rof	363852	364088	-	236	20	360	0.0847458	0.378076	4.06176e-09	23.1427	4.76028e-11	98.81	b0189	modulator of Rho-dependent transcription termination	COG4568	K	Transcriptional antiterminator	N	N	N
EC958_0336	yaeP	364099	364281	-	182	15	235	0.0824176	0.358094	6.90629e-09	22.3785	1.09529e-08	98.48	b4406	conserved protein	NA	NA	NA	N	N	N
EC958_0337	yaeQ	364465	364992	+	527	50	1146	0.0948767	0.463868	4.03257e-10	26.4283	8.90489e-24	98.34	b0190	conserved protein	COG4681	S	Uncharacterized protein conserved in bacteria	N	N	N
EC958_0338	yaeJ	365007	365411	+	404	45	1013	0.111386	0.593249	9.35105e-12	31.6695	2.13553e-18	97.14	b0191	conserved protein	COG1186	J	Protein chain release factor B	N	N	N
EC958_0339	nlpE	365443	366135	+	692	82	1393	0.118497	0.643057	1.84821e-12	33.8925	5.40405e-31	97.03	b0192	lipoprotein involved with copper homeostasis and adhesion	COG3015	MP	Uncharacterized lipoprotein NlpE involved in copper resistance	N	N	N
EC958_0340	yaeF	366309	367133	-	824	110	2601	0.133495	0.734431	6.04907e-14	38.5266	9.10315e-37	94.22	b0193	predicted lipoprotein	COG0791	M	Cell wall-associated hydrolases (invasion-associated proteins)	N	N	N
EC958_0341	proS	367195	368895	-	1700	1	2	0.000588235	2.35112e-09	0.87449	-23.4673	4.40518e-75	99.13	b0194	prolyl-tRNA synthetase	COG0442	J	Prolyl-tRNA synthetase	Y	Y	Y
EC958_0342	yaeB	369024	369713	-	689	71	1823	0.103048	0.530028	6.25878e-11	29.0378	7.31031e-31	99.57	b0195	conserved protein, UPF0066 family	COG1720	S	Uncharacterized conserved protein	N	N	N
EC958_0343	rcsF	369728	370114	-	386	55	1474	0.142487	0.780194	7.78639e-15	41.2749	1.3086e-17	100	b0196	predicted outer membrane protein, signal	NA	NA	NA	N	N	N
EC958_0344	metQ	370250	371047	-	797	112	2614	0.140527	0.770781	1.21735e-14	40.6776	1.38083e-35	100	b0197	DL-methionine transporter subunit	COG1464	P	ABC-type metal ion transport system, periplasmic component/surface antigen	N	N	N
EC958_0345	metI	371105	371740	-	635	112	2725	0.176378	0.89917	3.43206e-18	51.4788	1.68203e-28	99.54	b0198	DL-methionine transporter subunit	COG2011	P	ABC-type metal ion transport system, permease component	N	N	N
EC958_0346	metN	371751	372764	-	1013	128	3073	0.126357	0.693306	3.07931e-13	36.3296	4.92663e-45	99.71	b0199	DL-methionine transporter subunit	COG1135	P	ABC-type metal ion transport system, ATPase component	N	N	N
EC958_0347	gmhB	372970	373524	+	554	27	122	0.0487365	0.0997872	1.49367e-05	10.7369	5.87057e-25	97.89	b0200	D,D-heptose 1,7-bisphosphate phosphatase	COG0241	E	Histidinol phosphatase and related phosphatases	N	N	N
EC958_0349	0349	373606	373905	+	299	9	80	0.0301003	0.0221241	0.00104604	3.37951	8.35767e-14	22.54	b3021	-	NA	NA	NA	N	N	N
EC958_0350	dkgB	373899	374684	+	785	30	561	0.0382166	0.0481957	0.000164401	6.72199	4.62388e-35	98.13	b0207	2,5-diketo-D-gluconate reductase B	COG0656	R	Aldo/keto reductases, related to diketogulonate reductase	N	N	N
EC958_0351	yafC	374699	375595	-	896	46	621	0.0513393	0.115453	8.25143e-06	11.6913	6.45647e-40	99.34	b0208	predicted DNA-binding transcriptional regulator	COG0583	K	Transcriptional regulator	N	N	N
EC958_0352	yafD	375854	376636	+	782	51	732	0.0652174	0.214407	3.48625e-07	16.5973	6.25494e-35	99.62	b0209	conserved protein	COG3021	S	Uncharacterized protein conserved in bacteria	N	N	N
EC958_0353	yafE	376732	377484	+	752	54	1140	0.0718085	0.267934	7.75755e-08	18.8442	1.28348e-33	91.22	b0210	predicted S-adenosyl-L-methionine-dependent methyltransferase	COG2226	H	Methylase involved in ubiquinone/menaquinone biosynthesis	N	N	N
EC958_0354	mltD	377551	378753	-	1202	83	1743	0.0690516	0.245194	1.45448e-07	17.9097	2.6663e-53	100	b0211	predicted membrane-bound lytic murein transglycosylase D	COG0741	M	Soluble lytic murein transglycosylase and related regulatory proteins (some contain LysM/invasin domains)	N	N	N
EC958_0355	gloB	378981	379718	-	737	33	582	0.0447761	0.0780785	3.68464e-05	9.25794	5.81395e-33	98.8	b0212	hydroxyacylglutathione hydrolase	COG0491	R	Zn-dependent hydrolases, including glyoxylases	N	N	N
EC958_0356	yafS	379770	380474	+	704	55	1048	0.078125	0.321303	1.83774e-08	20.9593	1.61381e-31	99.17	b0213	predicted S-adenosyl-L-methionine-dependent methyltransferase	COG2226	H	Methylase involved in ubiquinone/menaquinone biosynthesis	N	N	N
EC958_0357	rnhA	380489	380938	-	449	35	1239	0.077951	0.319817	1.91211e-08	20.9015	2.29752e-20	99.35	b0214	ribonuclease HI, degrades RNA of DNA-RNA hybrids	COG0328	L	Ribonuclease HI	N	N	N
EC958_0358	dnaQ	381012	381734	+	722	12	37	0.0166205	0.00260521	0.0226092	-3.1175	2.63363e-32	98.77	b0215	DNA polymerase III epsilon subunit	COG0847	L	DNA polymerase III, epsilon subunit and related 3'-5' exonucleases	N	N	N
EC958_0359	yafV	382060	382812	-	752	50	871	0.0664894	0.224497	2.60863e-07	17.0344	1.28348e-33	98.02	b0219	predicted C-N hydrolase family amidase, NAD(P)-binding	COG0388	R	Predicted amidohydrolase	N	N	N
EC958_0360	ivy	382984	383439	+	455	54	1484	0.118681	0.644294	1.7722e-12	33.9498	1.25553e-20	99.36	b0220	inhibitor of vertebrate C-lysozyme	NA	NA	NA	N	N	N
EC958_0361	fadE	383500	385926	-	2426	193	4207	0.0795548	0.333535	1.3265e-08	21.4336	7.75465e-107	99.75	b0221	acyl coenzyme A dehydrogenase	COG1960	I	Acyl-CoA dehydrogenases	N	N	N
EC958_0362	lpcA	386184	386744	+	560	1	1	0.00178571	2.74119e-07	0.665555	-17.8233	3.20809e-25	100	b0222	D-sedoheptulose 7-phosphate isomerase	COG0279	G	Phosphoheptose isomerase	Y	N	N
EC958_0363	yafJ	386967	387716	+	749	53	1150	0.070761	0.259243	9.85019e-08	18.49	1.73622e-33	100	b0223	predicted amidotransfease	COG0121	R	Predicted glutamine amidotransferase	N	N	N
EC958_0364	yafK	387705	388427	-	722	72	1344	0.099723	0.503545	1.33571e-10	27.9799	2.63363e-32	100	b0224	conserved protein	COG3034	S	Uncharacterized protein conserved in bacteria	N	N	N
EC958_0365	yafL	388814	389488	+	674	59	1274	0.0875371	0.401966	2.14944e-09	24.0541	3.31145e-30	96.1	b0227	predicted lipoprotein and C40 family peptidase	COG0791	M	Cell wall-associated hydrolases (invasion-associated proteins)	N	N	N
EC958_0366	yafM	389682	390161	+	479	39	751	0.0814196	0.349527	8.67081e-09	22.0498	1.11968e-21	95.12	b0228	conserved protein	COG1943	L	Transposase and inactivated derivatives	N	N	N
EC958_0367	0367	390174	390302	-	128	14	179	0.109375	0.578453	1.4791e-11	31.0374	2.52016e-06	28.57	b2450	-	NA	NA	NA	N	N	N
EC958_0368	0368	390399	392474	-	2075	166	3534	0.08	0.33735	1.19847e-08	21.5809	1.74541e-91	44.44	b1879	-	COG1298	NU	Flagellar biosynthesis pathway, component FlhA	N	N	N
EC958_0369	0369	392476	393597	-	1121	68	1136	0.0606601	0.17945	9.85386e-07	15.0157	9.30583e-50	36.58	b1880	-	COG1377	NU	Flagellar biosynthesis pathway, component FlhB	N	N	N
EC958_0370	0370	393605	394369	-	764	58	938	0.0759162	0.302491	3.04081e-08	20.2235	3.83286e-34	33.47	b1950	-	COG1684	NU	Flagellar biosynthesis pathway, component FliR	N	N	N
EC958_0371	0371	394389	394643	-	254	17	206	0.0669291	0.228016	2.35975e-07	17.1852	7.76843e-12	38.67	b1949	-	COG1987	NU	Flagellar biosynthesis pathway, component FliQ	N	N	N
EC958_0372	0372	394664	395398	-	734	61	1382	0.0831063	0.364007	5.90273e-09	22.6049	7.8648e-33	48.36	b1948	-	COG1338	NU	Flagellar biosynthesis pathway, component FliP	N	N	N
EC958_0373	0373	395413	395766	-	353	29	484	0.082153	0.355822	7.33576e-09	22.2914	3.63235e-16	37.38	b1946	-	COG1886	NU	Flagellar motor switch/type III secretory pathway protein	N	N	N
EC958_0374	0374	395777	396610	-	833	193	6100	0.231693	0.976174	1.14406e-23	67.7713	3.67741e-37	30.49	b3181	-	NA	NA	NA	N	N	N
EC958_0375	0375	397015	397983	+	968	208	4806	0.214876	0.962377	5.29156e-22	62.8544	4.57929e-43	42.05	b2220	-	COG3829	KT	Transcriptional regulator containing PAS, AAA-type ATPase, and DNA-binding domains	N	N	N
EC958_0376	0376	398016	398339	+	323	20	468	0.0619195	0.188906	7.39445e-07	15.4553	7.45338e-15	26.73	b1937	-	COG1677	NU	Flagellar hook-basal body protein	N	N	N
EC958_0377	0377	398362	399990	+	1628	106	1959	0.0651106	0.213565	3.5722e-07	16.5605	6.21099e-72	32.04	b1938	-	COG1766	NU	Flagellar biosynthesis/type III secretory pathway lipoprotein	N	N	N
EC958_0378	0378	399986	400978	+	992	55	1297	0.0554435	0.142219	3.23696e-06	13.1716	4.08381e-44	31.85	b1939	-	COG1536	N	Flagellar motor switch protein	N	N	N
EC958_0379	0379	401000	401692	+	692	47	1125	0.0679191	0.235989	1.88298e-07	17.5237	5.40405e-31	23.79	b1940	-	COG1317	NU	Flagellar biosynthesis/type III secretory pathway protein	N	N	N
EC958_0380	0380	401703	403025	+	1322	82	1662	0.0620272	0.189723	7.21505e-07	15.4928	1.504e-58	50	b1941	-	COG1157	NU	Flagellar biosynthesis/type III secretory pathway ATPase	N	N	N
EC958_0381	0381	403046	403462	+	416	26	677	0.0625	0.19332	6.47779e-07	15.6572	6.37735e-19	33.33	b0921	-	NA	NA	NA	N	N	N
EC958_0382	0382	403483	403860	+	377	55	1084	0.145889	0.795803	3.58529e-15	42.3095	3.23933e-17	37.31	b3052	-	COG0615	MI	Cytidylyltransferase	N	N	N
EC958_0383	0383	406789	409209	-	2420	191	4211	0.0789256	0.328149	1.53112e-08	21.2251	1.41904e-106	31.75	b2059	-	COG0463	M	Glycosyltransferases involved in cell wall biogenesis	N	N	N
EC958_0384	0384	409274	410188	-	914	87	2082	0.095186	0.466434	3.75796e-10	26.5277	1.05365e-40	29.6	b4362	-	NA	NA	NA	N	N	N
EC958_0385	0385	410334	410744	-	410	32	780	0.0780488	0.320652	1.86995e-08	20.934	1.16701e-18	30.61	b1070	-	NA	NA	NA	N	N	N
EC958_0386	0386	410775	411035	-	260	17	530	0.0653846	0.215726	3.35584e-07	16.6549	4.24522e-12	28.12	b1071	-	COG2747	KNU	Negative regulator of flagellin synthesis (anti-sigma28 factor)	N	N	N
EC958_0387	0387	411135	411875	-	740	63	1326	0.0851351	0.381414	3.71672e-09	23.2701	4.29788e-33	21.1	b0207	-	COG1261	NO	Flagellar basal body P-ring biosynthesis protein	N	N	N
EC958_0388	0388	411954	412271	+	317	29	1016	0.0914826	0.435459	8.74273e-10	25.3343	1.36391e-14	39.06	b1073	-	COG1815	N	Flagellar basal body protein	N	N	N
EC958_0389	0389	412292	412705	+	413	49	1300	0.118644	0.644044	1.78731e-12	33.9382	8.62695e-19	43.84	b1074	-	COG1558	N	Flagellar basal body rod protein	N	N	N
EC958_0390	0390	412723	413418	+	695	77	1764	0.110791	0.588905	1.07091e-11	31.4827	3.99487e-31	27.17	b1075	-	COG1843	N	Flagellar hook capping protein	N	N	N
EC958_0391	0391	413555	413677	+	122	15	119	0.122951	0.672163	6.69512e-13	35.2758	4.6117e-06	37.93	b2019	-	NA	NA	NA	N	N	N
EC958_0392	0392	413708	414892	+	1184	116	3206	0.097973	0.489354	1.99065e-10	27.421	1.63383e-52	38.96	b1076	-	COG1749	N	Flagellar hook protein FlgE	N	N	N
EC958_0393	0393	414910	415629	+	719	71	1659	0.0987483	0.495661	1.66812e-10	27.6688	3.56263e-32	40.87	b1077	-	COG4787	N	Flagellar basal body rod protein	N	N	N
EC958_0394	0394	415726	416493	+	767	40	779	0.0521512	0.120554	6.85697e-06	11.9864	2.83339e-34	48.26	b1078	-	COG4786	N	Flagellar basal body rod protein	N	N	N
EC958_0395	0395	416594	417241	+	647	49	1015	0.0757342	0.300946	3.1697e-08	20.1627	5.02305e-29	34.23	b1079	-	COG2063	N	Flagellar basal body L-ring protein	N	N	N
EC958_0396	0396	417274	418356	+	1082	106	2080	0.0979667	0.489303	1.99348e-10	27.419	4.72683e-48	49.32	b1080	-	COG1706	N	Flagellar basal-body P-ring protein	N	N	N
EC958_0397	0397	418374	418655	+	281	18	558	0.0640569	0.205319	4.54217e-07	16.1969	5.12135e-13	35.06	b1081	-	COG3951	MNO	Rod binding protein	N	N	N
EC958_0398	0398	418863	420221	+	1358	125	2507	0.0920471	0.440213	7.68695e-10	25.5167	4.00543e-60	29	b1082	-	COG1256	N	Flagellar hook-associated protein	N	N	N
EC958_0399	0399	420254	421165	+	911	86	1946	0.0944018	0.45992	4.49372e-10	26.2756	1.42532e-40	25.94	b1083	-	COG1344	N	Flagellin and related hook-associated proteins	N	N	N
EC958_0400	0400	421200	422159	+	959	112	2430	0.116788	0.631456	2.72867e-12	33.3599	1.13357e-42	25.61	b1854	-	NA	NA	NA	N	N	N
EC958_0401	0401	422236	423060	-	824	146	1363	0.177184	0.901134	2.85559e-18	51.7191	9.10315e-37	26.72	b4133	-	COG3710	K	DNA-binding winged-HTH domains	N	N	N
EC958_0402	0402	423564	424460	+	896	131	3134	0.146205	0.79721	3.33549e-15	42.4057	6.45647e-40	29.14	b1923	-	COG1344	N	Flagellin and related hook-associated proteins	N	N	N
EC958_0403	0403	424888	426186	+	1298	123	2610	0.0947612	0.462909	4.14016e-10	26.3911	1.68647e-57	31.74	b1924	-	COG1345	N	Flagellar capping protein	N	N	N
EC958_0404	0404	426227	426601	+	374	24	405	0.0641711	0.206208	4.42545e-07	16.2364	4.382e-17	31.45	b1925	-	COG1516	NUO	Flagellin-specific chaperone FliS	N	N	N
EC958_0405	0405	426624	426917	+	293	21	569	0.0716724	0.266801	8.00215e-08	18.7982	1.52939e-13	26.76	b4076	-	NA	NA	NA	N	N	N
EC958_0406	0406	426932	427975	+	1043	71	1467	0.0680729	0.237234	1.8181e-07	17.5762	2.40096e-46	23.59	b1943	-	COG3144	N	Flagellar hook-length control protein	N	N	N
EC958_0407	0407	428001	428450	+	449	90	1918	0.200445	0.944979	1.42056e-20	58.6119	2.29752e-20	27.82	b2513	-	COG1580	N	Flagellar basal body-associated protein	N	N	N
EC958_0408	0408	428488	429186	+	698	166	4046	0.237822	0.979896	2.82817e-24	69.557	2.95316e-31	36.94	b1922	-	COG1191	K	DNA-directed RNA polymerase specialized sigma subunit	N	N	N
EC958_0409	0409	429217	430062	+	845	150	3630	0.177515	0.901928	2.64843e-18	51.8176	1.09819e-37	36.4	b1890	-	COG1291	N	Flagellar motor component	N	N	N
EC958_0410	0410	430083	430988	+	905	61	1281	0.0674033	0.231826	2.11795e-07	17.3475	2.60823e-40	33.89	b1889	-	COG1360	N	Flagellar motor protein	N	N	N
EC958_0411	dinB	431077	432114	+	1037	103	2064	0.099325	0.500332	1.46259e-10	27.8529	4.39357e-46	99.43	b0231	DNA polymerase IV	COG0389	L	Nucleotidyltransferase/DNA polymerase involved in DNA repair	N	N	N
EC958_0412	yafP	432129	432563	+	434	124	2732	0.285714	0.994944	5.12131e-29	83.4107	1.04074e-19	94.67	b0234	predicted acyltransferase with acyl-CoA N-acyltransferase domain	COG3153	R	Predicted acetyltransferase	N	N	N
EC958_0413	0413	432771	433892	+	1121	153	3174	0.136485	0.750387	3.05924e-14	39.4428	9.30583e-50	29.23	b3421	-	COG1690	S	Uncharacterized conserved protein	N	N	N
EC958_0414	0414	433907	434503	+	596	55	1217	0.0922819	0.442187	7.28635e-10	25.5925	8.54375e-27	27.62	b2891	-	COG1186	J	Protein chain release factor B	N	N	N
EC958_0415	pepD	434577	436016	-	1439	136	2808	0.0945101	0.460821	4.3841e-10	26.3104	1.14763e-63	98.56	b0237	aminoacyl-histidine dipeptidase (peptidase D)	COG2195	E	Di- and tripeptidases	N	N	N
EC958_0416	gpt	436295	436735	+	440	36	993	0.0818182	0.352948	7.91763e-09	22.1811	5.68733e-20	99.34	b0238	guanine-hypoxanthine phosphoribosyltransferase	COG0503	F	Adenine/guanine phosphoribosyltransferases and related PRPP-binding proteins	N	N	N
EC958_0417	frsA	436845	438071	+	1226	140	3271	0.114192	0.613383	4.93154e-12	32.549	2.3778e-54	98.79	b0239	fermentation-respiration switch protein; PTS Enzyme IIA(Glc)-binding protein; pNP-butyrate esterase activity	COG1073	R	Hydrolases of the alpha/beta superfamily	N	N	N
EC958_0418	crl	438147	438530	+	383	61	1353	0.159269	0.848747	1.69684e-16	46.3548	1.7702e-17	94.74	b0240	sigma factor-binding protein, stimulates RNA polymerase holoenzyme formation	NA	NA	NA	N	N	N
EC958_0419	phoE	438587	439624	-	1037	178	3455	0.171649	0.886956	1.0088e-17	50.0674	4.39357e-46	98.86	b0241	outer membrane phosphoporin protein E	COG3203	M	Outer membrane protein (porin)	N	N	N
EC958_0420	proB	439931	441016	+	1085	105	1642	0.0967742	0.479541	2.61634e-10	27.0372	3.49424e-48	100	b0242	gamma-glutamate kinase	COG0263	E	Glutamate 5-kinase	N	N	N
EC958_0421	proA	441046	442284	+	1238	104	1806	0.0840065	0.371734	4.80749e-09	22.9004	7.10085e-55	98.33	b0243	gamma-glutamylphosphate reductase	COG0014	E	Gamma-glutamyl phosphate reductase	N	N	N
EC958_0422	0422	442856	443308	-	452	34	432	0.0752212	0.296599	3.56292e-08	19.9912	1.69841e-20	21.18	b3011	-	NA	NA	NA	N	N	N
EC958_0423	0423	443529	443636	-	107	18	319	0.168224	0.877325	2.20245e-17	49.0431	2.08902e-05	43.33	b0608	-	NA	NA	NA	N	N	N
EC958_0424	0424	443669	444898	-	1229	171	2272	0.139138	0.763921	1.67108e-14	40.2535	1.75776e-54	29.81	b4348	-	COG0732	V	Restriction endonuclease S subunits	N	N	N
EC958_0425	0425	444906	446525	-	1619	132	3171	0.0815318	0.35049	8.45184e-09	22.0867	1.53748e-71	25.87	b4349	-	COG0286	V	Type I restriction-modification system methyltransferase subunit	N	N	N
EC958_0426	0426	446537	449617	-	3080	278	6010	0.0902597	0.425123	1.15541e-09	24.9385	1.92468e-135	29.13	b0643	-	COG0610	V	Type I site-specific restriction-modification system, R (restriction) subunit and related helicases	N	N	N
EC958_0427	0427	449919	450683	+	764	39	461	0.0510471	0.113642	8.8198e-06	11.5848	3.83286e-34	34.04	b4051	-	NA	NA	NA	N	N	N
EC958_0428	0428	450688	451590	+	902	86	1756	0.0953437	0.46774	3.62526e-10	26.5783	3.52827e-40	27.54	b0611	-	COG2253	S	Uncharacterized conserved protein	N	N	N
EC958_0429	0429	451773	452531	-	758	178	4023	0.234828	0.978152	5.5969e-24	68.6853	7.01384e-34	27.75	b0281	-	COG0582	L	Integrase	N	N	N
EC958_0430	0430	452757	452870	-	113	20	706	0.176991	0.900666	2.98427e-18	51.6615	1.14159e-05	33.33	b2349	-	NA	NA	NA	N	N	N
EC958_0431	0431	453526	453693	+	167	68	3589	0.407186	0.999887	4.80433e-41	118.017	4.9615e-08	27.59	b0112	-	NA	NA	NA	N	N	N
EC958_0432	yagU	453926	454522	+	596	166	3928	0.278523	0.993746	2.63872e-28	81.3405	8.54375e-27	99.51	b0287	inner membrane protein, DUF1440 family	COG3477	S	Predicted periplasmic/secreted protein	N	N	N
EC958_0433	ykgJ	454789	455100	-	311	83	2534	0.266881	0.991209	3.75143e-27	77.9818	2.49585e-14	98.17	b0288	predicted ferredoxin	COG0727	R	Predicted Fe-S-cluster oxidoreductase	N	N	N
EC958_0434	yagV	455425	456117	-	692	68	1323	0.0982659	0.491741	1.86204e-10	27.5146	5.40405e-31	97.46	b0289	conserved protein	NA	NA	NA	N	N	N
EC958_0435	yagW	456104	457729	-	1625	130	2408	0.08	0.33735	1.19847e-08	21.5809	8.40189e-72	99.27	b0290	predicted receptor	NA	NA	NA	N	N	N
EC958_0436	yagX	457737	460244	-	2507	216	4052	0.0861588	0.390183	2.94309e-09	23.6047	2.22186e-110	98.57	b0291	predicted aromatic compound dioxygenase	COG3188	NU	P pilus assembly protein, porin PapC	N	N	N
EC958_0437	matC	460288	460938	-	650	52	862	0.08	0.33735	1.19847e-08	21.5809	3.71322e-29	99.1	b0292	predicted protein	NA	NA	NA	N	N	N
EC958_0438	matB	461013	461582	-	569	91	1734	0.15993	0.851033	1.45953e-16	46.5537	1.29598e-25	99.49	b0293	cryptic Mat fimbrillin gene	NA	NA	NA	N	N	N
EC958_0439	matA	461675	462199	-	524	70	1687	0.133588	0.734936	5.92265e-14	38.555	1.20461e-23	97.22	b0294	predicted regulator	COG2771	K	DNA-binding HTH domain-containing proteins	N	N	N
EC958_0440	ykgO	463301	463423	-	122	12	314	0.0983607	0.492512	1.82224e-10	27.5449	4.6117e-06	100	b4506	rpmJ (L36) paralog	COG0257	J	Ribosomal protein L36	N	N	N
EC958_0441	ykgM	463441	463686	-	245	38	628	0.155102	0.833644	4.38768e-16	45.099	1.92302e-11	100	b0296	rpmE (L31) paralog	COG0254	J	Ribosomal protein L31	N	N	N
EC958_0442	0442	464643	465767	-	1124	181	2046	0.161032	0.854781	1.13518e-16	46.8852	6.87921e-50	28.98	b3081	-	COG1902	C	NADH:flavin oxidoreductases, Old Yellow Enzyme family	N	N	N
EC958_0443	0443	465958	466860	-	902	186	4087	0.206208	0.952661	3.81791e-21	60.309	3.52827e-40	42.28	b1327	-	COG1073	R	Hydrolases of the alpha/beta superfamily	N	N	N
EC958_0444	0444	466972	467943	+	971	190	2444	0.195675	0.937776	4.2156e-20	57.204	3.38518e-43	37.8	b0900	-	COG0583	K	Transcriptional regulator	N	N	N
EC958_0445	0445	468161	469036	+	875	111	1862	0.126857	0.696326	2.74767e-13	36.4839	5.35193e-39	47.46	b1328	-	COG0583	K	Transcriptional regulator	N	N	N
EC958_0446	0446	469085	470056	-	971	102	1924	0.105046	0.545616	3.96834e-11	29.6712	3.38518e-43	33.43	b0419	-	COG0667	C	Predicted oxidoreductases (related to aryl-alcohol dehydrogenases)	N	N	N
EC958_0447	0447	470101	470934	-	833	73	1102	0.0876351	0.402802	2.10196e-09	24.086	3.67741e-37	42.64	b3012	-	COG0656	R	Aldo/keto reductases, related to diketogulonate reductase	N	N	N
EC958_0448	0448	471518	475747	+	4229	544	13899	0.128636	0.706899	1.83175e-13	37.0324	1.06764e-185	32.59	b1978	-	NA	NA	NA	N	N	N
EC958_0449	0449	475890	476729	-	839	171	3526	0.203814	0.949597	6.59036e-21	59.6043	2.0096e-37	31.14	b4396	-	COG4977	K	Transcriptional regulator containing an amidase domain and an AraC-type DNA-binding HTH domain	N	N	N
EC958_0450	0450	476995	477846	+	851	187	4716	0.219741	0.966987	1.7451e-22	64.2798	6.00127e-38	40.47	b3012	-	COG0656	R	Aldo/keto reductases, related to diketogulonate reductase	N	N	N
EC958_0451	ykgB	478024	478599	-	575	138	1301	0.24	0.981082	1.72139e-24	70.1907	7.08213e-26	98.98	b0301	inner membrane protein, DUF417 family	COG3059	S	Predicted membrane protein	N	N	N
EC958_0452	ykgI	478629	478847	-	218	10	47	0.0458716	0.0838168	2.87031e-05	9.6705	2.91697e-10	96.15	b0303	predicted protein	NA	NA	NA	N	N	N
EC958_0453	ykgC	478974	480281	-	1307	250	4801	0.191278	0.930392	1.14874e-19	55.9039	6.81286e-58	99.32	b0304	predicted pyridine nucleotide-disulfide oxidoreductase	COG1249	C	Pyruvate/2-oxoglutarate dehydrogenase complex, dihydrolipoamide dehydrogenase (E3) component, and related enzymes	N	N	N
EC958_0454	ykgD	480526	481362	+	836	146	2118	0.174641	0.894826	5.09951e-18	50.9609	2.71848e-37	98.94	b0305	predicted DNA-binding transcriptional regulator	COG2207	K	AraC-type DNA-binding domain-containing proteins	N	N	N
EC958_0455	ykgE	481906	482607	+	701	106	1356	0.151213	0.818438	1.06503e-15	43.9236	2.18308e-31	98.74	b0306	predicted oxidoreductase	COG0247	C	Fe-S oxidoreductase	N	N	N
EC958_0456	ykgF	482636	484045	+	1409	142	2079	0.100781	0.51204	1.0495e-10	28.317	2.35487e-62	99.37	b0307	predicted electron transport protein with ferridoxin-like domai	COG1139	C	Uncharacterized conserved protein containing a ferredoxin-like domain	N	N	N
EC958_0457	ykgG	484056	484733	+	677	73	1290	0.107829	0.566874	2.10432e-11	30.5502	2.44795e-30	97.4	b0308	predicted transporter	COG1556	S	Uncharacterized conserved protein	N	N	N
EC958_0458	ykgH	484994	485644	-	650	26	227	0.04	0.0555457	0.000109475	7.42365	3.71322e-29	96.4	b0310	predicted inner membrane protein	NA	NA	NA	N	N	N
EC958_0459	0459	485846	488119	-	2273	449	7472	0.197536	0.940683	2.7575e-20	57.7537	3.81598e-100	22.26	b2647	-	COG4625	S	Uncharacterized protein with a C-terminal OMP (outer membrane protein) domain	N	N	N
EC958_0460	0460	488179	488922	-	743	145	4047	0.195155	0.936941	4.74599e-20	57.0504	3.17715e-33	27.08	b2748	-	NA	NA	NA	N	N	N
EC958_0461	0461	489094	489870	-	776	121	3607	0.155928	0.836733	3.63469e-16	45.3481	1.14461e-34	40.35	b0315	-	COG2197	TK	Response regulator containing a CheY-like receiver domain and an HTH DNA-binding domain	N	N	N
EC958_0462	0462	490218	490763	-	545	118	2307	0.216514	0.963992	3.64268e-22	63.3345	1.45321e-24	56.04	b4312	-	COG4974	L	Site-specific recombinase XerD	N	N	N
EC958_0463	betA	491866	493518	-	1652	123	2134	0.0744552	0.290124	4.24284e-08	19.7346	5.53896e-73	97.84	b0311	choline dehydrogenase, a flavoprotein	COG2303	E	Choline dehydrogenase and related flavoproteins	N	N	N
EC958_0464	betB	493550	495004	-	1454	123	1928	0.0845942	0.376776	4.20455e-09	23.093	2.53349e-64	98.37	b0312	betaine aldehyde dehydrogenase, NAD-dependent	COG1012	C	NAD-dependent aldehyde dehydrogenases	N	N	N
EC958_0465	betI	495036	495605	-	569	46	1129	0.0808436	0.344584	9.88775e-09	21.8597	1.29598e-25	97.44	b0313	DNA-binding transcriptional repressor	COG1309	K	Transcriptional regulator	N	N	N
EC958_0466	betT	495752	497767	+	2015	195	3088	0.0967742	0.479541	2.61634e-10	27.0372	7.34899e-89	99.85	b0314	choline transporter of high affinity	COG1292	M	Choline-glycine betaine transporter	N	N	N
EC958_0467	yahA	498663	499733	+	1070	296	6059	0.276636	0.993389	4.05822e-28	80.7964	1.58284e-47	98.9	b0315	c-di-GMP-specific phosphodiesterase	COG2200	T	FOG: EAL domain	N	N	N
EC958_0468	yahB	499793	500707	-	914	193	4580	0.21116	0.958462	1.2347e-21	61.764	1.05365e-40	98.71	b0316	predicted DNA-bindng transcriptional regulator	COG0583	K	Transcriptional regulator	N	N	N
EC958_0469	yahC	500817	501296	-	479	85	1761	0.177453	0.90178	2.68599e-18	51.7992	1.11968e-21	96.97	b0317	predicted inner membrane protein	NA	NA	NA	N	N	N
EC958_0470	yahD	501572	502159	+	587	88	1056	0.149915	0.813118	1.43172e-15	43.5307	2.11494e-26	98.51	b0318	ankyrin repeat protein	COG0666	R	FOG: Ankyrin repeat	N	N	N
EC958_0471	yahE	502217	503062	+	845	210	7704	0.248521	0.985115	2.46708e-25	72.6662	1.09819e-37	95.47	b0319	predicted protein	NA	NA	NA	N	N	N
EC958_0472	yahF	503070	504599	+	1529	139	2154	0.0909091	0.430617	9.96413e-10	25.1487	1.32833e-67	97.28	b0320	predicted acyl-CoA synthetase with NAD(P)-binding domain and succinyl-CoA synthetase domain	COG0074	C	Succinyl-CoA synthetase, alpha subunit	N	N	N
EC958_0473	yahG	504617	506017	+	1400	107	2034	0.0764286	0.306843	2.70557e-08	20.3945	5.82931e-62	99.36	b0321	conserved protein	NA	NA	NA	N	N	N
EC958_0474	yahI	506188	507120	+	932	63	986	0.0675966	0.233384	2.02665e-07	17.4135	1.71948e-41	98.42	b0323	carbamate kinase-like protein	COG0549	E	Carbamate kinase	N	N	N
EC958_0475	yahJ	507148	508512	+	1364	115	1955	0.0843109	0.374345	4.48517e-09	23.0002	2.18885e-60	98.04	b0324	predicted deaminase with metallo-dependent hydrolase domain	COG0402	FR	Cytosine deaminase and related metal-dependent hydrolases	N	N	N
EC958_0476	yahK	508907	509938	+	1031	127	1904	0.123181	0.673625	6.35227e-13	35.3472	8.03991e-46	98.28	b0325	predicted oxidoreductase, Zn-dependent and NAD(P)-binding	COG1064	R	Zn-dependent alcohol dehydrogenases	N	N	N
EC958_0477	yahN	510840	511454	-	614	141	2919	0.229642	0.97479	1.82612e-23	67.1731	1.39428e-27	99.05	b0328	inner membrane protein, LysE transporter family; overproduction confers sensitivity to L-homoserine	COG1280	E	Putative threonine efflux protein	N	N	N
EC958_0478	yahO	511658	511915	+	257	33	534	0.128405	0.705542	1.93078e-13	36.9613	5.74271e-12	97.8	b0329	predicted protein	NA	NA	NA	N	N	N
EC958_0479	prpR	512034	513602	-	1568	144	2460	0.0918367	0.438442	8.06467e-10	25.4487	2.61512e-69	97.16	b0330	propionate catabolism operon regulatory protein	COG3829	KT	Transcriptional regulator containing PAS, AAA-type ATPase, and DNA-binding domains	N	N	N
EC958_0480	prpB	513859	514731	+	872	63	992	0.0722477	0.271594	7.01838e-08	18.9924	7.23981e-39	98.99	b0331	2-methylisocitrate lyase	COG2513	G	PEP phosphonomutase and related enzymes	N	N	N
EC958_0481	prpC	514909	516060	+	1151	85	1343	0.0738488	0.285014	4.8719e-08	19.5312	4.53513e-51	99.23	b0333	2-methylcitrate synthase	COG0372	C	Citrate synthase	N	N	N
EC958_0482	prpD	516112	517545	+	1433	107	1664	0.0746685	0.291925	4.04142e-08	19.8061	2.10008e-63	99.38	b0334	2-methylcitrate dehydratase	COG2079	R	Uncharacterized protein involved in propionate catabolism	N	N	N
EC958_0483	prpE	517603	519471	+	1868	132	2823	0.0706638	0.25844	1.00709e-07	18.4571	1.97623e-82	99.36	b0335	propionate--CoA ligase	COG0365	I	Acyl-coenzyme A synthetases/AMP-(fatty) acid ligases	N	N	N
EC958_0484	codB	519814	521055	+	1241	100	1960	0.0805802	0.342325	1.04998e-08	21.7727	5.2492e-55	99.52	b0336	cytosine transporter	COG1457	F	Purine-cytosine permease and related proteins	N	N	N
EC958_0485	codA	521063	522328	+	1265	122	2682	0.0964427	0.476815	2.82175e-10	26.931	4.68124e-56	98.13	b0337	cytosine deaminase	COG0402	FR	Cytosine deaminase and related metal-dependent hydrolases	N	N	N
EC958_0486	lacA	522467	523060	-	593	161	4780	0.271501	0.992315	1.30845e-27	79.3156	1.15575e-26	95.57	b0342	thiogalactoside acetyltransferase	COG0110	R	Acetyltransferase (isoleucine patch superfamily)	N	N	N
EC958_0487	lacY	523144	524379	-	1235	287	5388	0.232389	0.976627	9.76187e-24	67.9742	9.60565e-55	99.52	b0343	lactose permease	COG2223	P	Nitrate/nitrite transporter	N	N	N
EC958_0488	lacZ	524449	527505	-	3056	265	5663	0.0867147	0.394939	2.59275e-09	23.7861	2.15819e-134	97.36	b0344	beta-D-galactosidase	COG3250	G	Beta-galactosidase/beta-glucuronidase	N	N	N
EC958_0489	lacI	527646	528710	-	1064	88	1658	0.0827068	0.360577	6.46562e-09	22.4736	2.89647e-47	98.61	b0345	DNA-binding transcriptional repressor	COG1609	K	Transcriptional regulators	N	N	N
EC958_0490	mhpR	528805	529620	-	815	56	812	0.0687117	0.242422	1.57169e-07	17.794	2.25342e-36	98.56	b0346	DNA-binding transcriptional activator, 3HPP-binding	COG1414	K	Transcriptional regulator	N	N	N
EC958_0491	mhpA	529829	531475	+	1646	146	3361	0.0886999	0.411878	1.64888e-09	24.4324	1.01359e-72	99.1	b0347	3-(3-hydroxyphenyl)propionate hydroxylase	COG0654	HC	2-polyprenyl-6-methoxyphenol hydroxylase and related FAD-dependent oxidoreductases	N	N	N
EC958_0492	mhpB	531495	532421	+	926	75	1694	0.0809935	0.345871	9.55545e-09	21.9092	3.14651e-41	100	b0348	2,3-dihydroxyphenylpropionate 1,2-dioxygenase	COG1355	R	Predicted dioxygenase	N	N	N
EC958_0493	mhpC	532457	533305	+	848	58	1207	0.0683962	0.239857	1.68888e-07	17.6865	8.1182e-38	99.31	b0349	2-hydroxy-6-ketonona-2,4-dienedioic acid hydrolase	COG0596	R	Predicted hydrolases or acyltransferases (alpha/beta hydrolase superfamily)	N	N	N
EC958_0494	mhpD	533333	534124	+	791	64	1247	0.0809102	0.345156	9.73862e-09	21.8817	2.52682e-35	99.26	b0350	2-keto-4-pentenoate hydratase	COG3971	Q	2-keto-4-pentenoate hydratase	N	N	N
EC958_0495	mhpF	534139	535071	+	932	72	1026	0.0772532	0.313864	2.24184e-08	20.6694	1.71948e-41	99.37	b0351	acetaldehyde-CoA dehydrogenase II, NAD-binding	COG4569	Q	Acetaldehyde dehydrogenase (acetylating)	N	N	N
EC958_0496	mhpE	535086	536081	+	995	67	1273	0.0673367	0.23129	2.15037e-07	17.3247	3.0189e-44	99.41	b0352	4-hyroxy-2-oxovalerate/4-hydroxy-2-oxopentanoic acid aldolase, class I	COG0119	E	Isopropylmalate/homocitrate/citramalate synthases	N	N	N
EC958_0497	0497	536124	536246	+	122	13	134	0.106557	0.557227	2.81184e-11	30.149	4.6117e-06	38.89	b0942	-	NA	NA	NA	N	N	N
EC958_0498	mhpT	536275	537468	+	1193	78	1484	0.0653814	0.2157	3.3583e-07	16.6538	6.60021e-53	99.01	b0353	predicted 3-hydroxyphenylpropionic transporter	COG2814	G	Arabinose efflux permease	N	N	N
EC958_0499	yaiL	537588	538109	+	521	74	1712	0.142035	0.778048	8.6326e-15	41.1371	1.62953e-23	99.44	b0354	predicted protein	COG3122	S	Uncharacterized protein conserved in bacteria	N	N	N
EC958_0500	frmB	538252	539067	-	815	102	1955	0.125153	0.685945	4.05198e-13	35.9576	2.25342e-36	97.47	b0355	S-formylglutathione hydrolase	COG0627	R	Predicted esterase	N	N	N
EC958_0501	frmA	539178	540269	-	1091	81	1432	0.0742438	0.288341	4.45234e-08	19.6637	1.9095e-48	99.19	b0356	alcohol dehydrogenase class III/glutathione-dependent formaldehyde dehydrogenase	COG1062	C	Zn-dependent alcohol dehydrogenases, class III	N	N	N
EC958_0502	frmR	540322	540579	-	257	14	261	0.0544747	0.135685	4.03709e-06	12.8247	5.74271e-12	100	b0357	regulator protein that represses frmRAB operon	COG1937	S	Uncharacterized protein conserved in bacteria	N	N	N
EC958_0503	0503	540821	540931	-	110	9	109	0.0818182	0.352948	7.91763e-09	22.1811	1.54428e-05	40.62	b3229	-	NA	NA	NA	N	N	N
EC958_0504	tauA	540969	541847	+	878	86	1522	0.0979499	0.489166	2.00115e-10	27.4136	3.95635e-39	99.33	b0365	taurine transporter subunit	COG4521	P	ABC-type taurine transport system, periplasmic component	N	N	N
EC958_0505	tauB	541878	542627	+	749	46	875	0.0614152	0.1851	8.29543e-07	15.2795	1.73622e-33	98.04	b0366	taurine transporter subunit	COG4525	P	ABC-type taurine transport system, ATPase component	N	N	N
EC958_0506	tauC	542642	543451	+	809	58	1381	0.0716934	0.266976	7.96375e-08	18.8053	4.12358e-36	96.73	b0367	taurine transporter subunit	COG0600	P	ABC-type nitrate/sulfonate/bicarbonate transport system, permease component	N	N	N
EC958_0507	tauD	543466	544299	+	833	59	1154	0.0708283	0.2598	9.70017e-08	18.5128	3.67741e-37	97.53	b0368	taurine dioxygenase, 2-oxoglutarate-dependent	COG2175	Q	Probable taurine catabolism dioxygenase	N	N	N
EC958_0508	hemB	544357	545313	-	956	0	0	0	0	1	-173.929	1.53343e-42	100	b0369	5-aminolevulinate dehydratase (porphobilinogen synthase)	COG0113	H	Delta-aminolevulinic acid dehydratase	Y	Y	Y
EC958_0509	0509	545857	548826	+	2969	798	20559	0.268777	0.99168	2.4346e-27	78.5295	1.37838e-130	23.02	b2647	-	COG3468	MU	Type V secretory pathway, adhesin AidA	N	N	N
EC958_0510	yaiV	548930	549535	+	605	46	372	0.0760331	0.303483	2.96089e-08	20.2625	3.45143e-27	99.52	b0375	predicted DNA-binding transcriptional regulator	COG0664	T	cAMP-binding proteins - catabolite gene activator and regulatory subunit of cAMP-dependent protein kinases	N	N	N
EC958_0511	ampH	549554	550693	-	1139	180	3280	0.158033	0.844393	2.24897e-16	45.9828	1.51864e-50	98.96	b0376	penicillin-binding protein	COG1680	V	Beta-lactamase class C and other penicillin binding proteins	N	N	N
EC958_0512	0512	550849	551028	+	179	21	257	0.117318	0.635081	2.41803e-12	33.5252	1.48165e-08	52.63	b0788	-	NA	NA	NA	N	N	N
EC958_0513	sbmA	551066	552268	+	1202	100	1679	0.0831947	0.364766	5.78494e-09	22.634	2.6663e-53	99.01	b0377	microcin B17 transporter	COG1133	I	ABC-type long-chain fatty acid transport system, fused permease and ATPase components	N	N	N
EC958_0514	yaiW	552299	553375	+	1076	71	1646	0.0659851	0.220482	2.92644e-07	16.8614	8.64974e-48	99.18	b0378	probable lipoprotein required for swarming phenotype	NA	NA	NA	N	N	N
EC958_0515	yaiY	553452	553742	-	290	16	208	0.0551724	0.140378	3.44337e-06	13.0747	2.06888e-13	100	b0379	inner membrane protein, DUF2755 family	NA	NA	NA	N	N	N
EC958_0516	yaiZ	553888	554214	+	326	25	554	0.0766871	0.309043	2.5507e-08	20.4808	5.50981e-15	100	b0380	predicted inner membrane protein, DUF2754 family	NA	NA	NA	N	N	N
EC958_0517	ddlA	554256	555332	-	1076	95	1689	0.08829	0.408387	1.81041e-09	24.2991	8.64974e-48	99.45	b0381	D-alanine-D-alanine ligase A	COG1181	M	D-alanine-D-alanine ligase and related ATP-grasp enzymes	N	N	N
EC958_0518	0518	555428	555532	+	104	18	316	0.173077	0.890773	7.28473e-18	50.494	2.82592e-05	32.14	b3010	-	NA	NA	NA	N	N	N
EC958_0519	iraP	555813	556055	+	242	64	1209	0.264463	0.99057	6.51091e-27	77.283	2.60135e-11	98.84	b0382	anti-RssB factor, RpoS stabilzer during Pi starvation; anti-adapter protein	NA	NA	NA	N	N	N
EC958_0520	phoA	556174	557571	+	1397	188	3548	0.134574	0.740274	4.72994e-14	38.8575	7.88558e-62	99.36	b0383	bacterial alkaline phosphatase	COG1785	P	Alkaline phosphatase	N	N	N
EC958_0521	psiF	557708	558010	+	302	27	552	0.089404	0.417864	1.40434e-09	24.661	6.1783e-14	100	b0384	conserved protein, PsiF family, pho regulon	NA	NA	NA	N	N	N
EC958_0522	adrA	558130	559227	+	1097	101	1986	0.0920693	0.4404	7.64823e-10	25.5238	1.04349e-48	100	b0385	diguanylate cyclase for cellulose, biofilm, motility regulation	COG2199	T	FOG: GGDEF domain	N	N	N
EC958_0523	proC	559262	560053	-	791	64	1045	0.0809102	0.345156	9.73862e-09	21.8817	2.52682e-35	98.51	b0386	pyrroline-5-carboxylate reductase, NAD(P)-binding	COG0345	E	Pyrroline-5-carboxylate reductase	N	N	N
EC958_0524	yaiI	560191	560631	+	440	26	483	0.0590909	0.167908	1.40924e-06	14.465	5.68733e-20	100	b0387	conserved protein, UPF0178 family, downregulated by beryllium	COG1671	S	Uncharacterized protein conserved in bacteria	N	N	N
EC958_0525	aroL	560832	561338	+	506	34	714	0.0671937	0.230139	2.22163e-07	17.2757	7.3815e-23	100	b0388	shikimate kinase II	COG0703	E	Shikimate kinase	N	N	N
EC958_0526	yaiA	561406	561579	+	173	26	497	0.150289	0.814665	1.31464e-15	43.644	2.71131e-08	100	b0389	predicted protein	NA	NA	NA	N	N	N
EC958_0527	aroM	561855	562514	+	659	107	2358	0.162367	0.859214	8.37255e-17	47.2865	1.50003e-29	96.89	b0390	conserved protein, AroM family; regulated by aroR	NA	NA	NA	N	N	N
EC958_0528	yaiE	562604	562870	+	266	58	1890	0.218045	0.965443	2.56916e-22	63.7831	2.31989e-12	100	b0391	conserved protein, UPF0345 family	COG3123	S	Uncharacterized protein conserved in bacteria	N	N	N
EC958_0529	0529	562992	563117	-	125	39	931	0.312	0.997708	1.27833e-31	90.9536	3.40914e-06	29.73	b1132	-	NA	NA	NA	N	N	N
EC958_0530	0530	563096	563359	+	263	80	3316	0.304183	0.997094	7.59818e-31	88.7141	3.13822e-12	38.46	b1407	-	NA	NA	NA	N	N	N
EC958_0531	rdgC	563535	564494	-	959	83	1550	0.0865485	0.393518	2.69286e-09	23.7319	1.13357e-42	99.67	b0393	nucleoid-associated ssDNA and dsDNA binding protein; competitive inhibitor of RecA function	COG2974	L	DNA recombination-dependent growth factor C	N	N	N
EC958_0532	mak	564571	565461	+	890	87	1479	0.0977528	0.487557	2.09312e-10	27.3505	1.18148e-39	98.68	b0394	manno(fructo)kinase	COG1940	KG	Transcriptional regulator/sugar kinase	N	N	N
EC958_0533	0533	565503	565622	+	119	14	172	0.117647	0.637316	2.24348e-12	33.6277	6.23846e-06	45.16	b3674	-	NA	NA	NA	N	N	N
EC958_0534	araJ	565748	566998	-	1250	284	7751	0.2272	0.973044	3.1864e-23	66.4604	2.12053e-55	98.98	b0396	predicted transporter	COG2814	G	Arabinose efflux permease	N	N	N
EC958_0535	sbcC	567058	570183	-	3125	254	4960	0.08128	0.348329	8.95127e-09	22.0037	2.07066e-137	97.04	b0397	exonuclease, dsDNA, ATP-dependent	COG0419	L	ATPase involved in DNA repair	N	N	N
EC958_0536	sbcD	570198	571382	-	1184	135	3118	0.11402	0.612165	5.12904e-12	32.4951	1.63383e-52	98.75	b0398	exonuclease, dsDNA, ATP-dependent	COG0420	L	DNA repair exonuclease	N	N	N
EC958_0537	phoB	571590	572261	+	671	78	1646	0.116244	0.627714	3.08893e-12	33.1902	4.47956e-30	100	b0399	DNA-binding response regulator in two-component regulatory system with PhoR (or CreC)	COG0745	TK	Response regulators consisting of a CheY-like receiver domain and a winged-helix DNA-binding domain	N	N	N
EC958_0538	phoR	572337	573614	+	1277	110	2096	0.0861394	0.390017	2.95612e-09	23.5984	1.39796e-56	98.84	b0400	sensory histidine kinase in two-component regulatory system with PhoB	COG5002	T	Signal transduction histidine kinase	N	N	N
EC958_0539	brnQ	574039	575340	+	1301	146	2741	0.112221	0.599305	7.72962e-12	31.9316	1.2467e-57	99.77	b0401	Branched-chain amino acid transport system 2 carrier protein; LIV-II transport system for Ile, Leu, and Val	COG1114	E	Branched-chain amino acid permeases	N	N	N
EC958_0540	proY	575434	576789	+	1355	122	2608	0.0900369	0.423235	1.21563e-09	24.8663	5.41833e-60	100	b0402	proline-specific permease	COG1113	E	Gamma-aminobutyrate permease and related permeases	N	N	N
EC958_0541	malZ	576963	578762	+	1799	173	3162	0.0961645	0.474523	3.00649e-10	26.8418	2.05977e-79	97.52	b0403	maltodextrin glucosidase	COG0366	G	Glycosidases	N	N	N
EC958_0542	acpH	578785	579348	-	563	36	536	0.0639432	0.204435	4.66154e-07	16.1576	2.37154e-25	97.93	b0404	conserved protein	COG3124	S	Uncharacterized protein conserved in bacteria	N	N	N
EC958_0543	queA	579459	580511	+	1052	64	783	0.0608365	0.180764	9.46547e-07	15.0773	9.69918e-47	99.72	b0405	S-adenosylmethionine:tRNA ribosyltransferase-isomerase	COG0809	J	S-adenosylmethionine:tRNA-ribosyltransferase-isomerase (queuine synthetase)	N	N	N
EC958_0544	tgt	580584	581693	+	1109	109	1881	0.0982867	0.49191	1.85321e-10	27.5213	3.11617e-49	100	b0406	tRNA-guanine transglycosylase	COG0343	J	Queuine/archaeosine tRNA-ribosyltransferase	N	N	N
EC958_0545	yajC	581734	582048	+	314	19	412	0.0605096	0.178331	1.0198e-06	14.963	1.84503e-14	100	b0407	SecYEG protein translocase auxillary subunit	COG1862	U	Preprotein translocase subunit YajC	N	N	N
EC958_0546	secD	582127	583923	+	1796	12	46	0.00668151	6.99526e-05	0.217979	-10.1757	2.78634e-79	99.83	b0408	SecYEG protein translocase auxillary subunit	COG0342	U	Preprotein translocase subunit SecD	Y	Y	Y
EC958_0547	secF	583952	584905	+	953	12	211	0.0125918	0.000893425	0.0566492	-5.53874	2.07434e-42	99.69	b0409	SecYEG protein translocase auxillary subunit	COG0341	U	Preprotein translocase subunit SecF	Y	Y	Y
EC958_0548	yajD	585053	585382	+	329	31	582	0.0942249	0.458448	4.67859e-10	26.2187	4.07305e-15	100	b0410	conserved protein, HNH family	NA	NA	NA	N	N	N
EC958_0549	tsx	585438	586304	-	866	80	1460	0.0923788	0.443001	7.12718e-10	25.6237	1.32483e-38	98.3	b0411	nucleoside channel, receptor of phage T6 and colicin K	COG3248	M	Nucleoside-binding outer membrane protein	N	N	N
EC958_0550	yajI	586621	587142	-	521	39	832	0.074856	0.29351	3.87228e-08	19.8689	1.62953e-23	98.32	b0412	predicted lipoprotein	NA	NA	NA	N	N	N
EC958_0551	nrdR	587311	587742	+	431	14	241	0.0324826	0.0285372	0.000607666	4.38979	1.40785e-19	100	b0413	conserved protein	COG1327	K	Predicted transcriptional regulator, consists of a Zn-ribbon and ATP-cone domains	N	N	N
EC958_0552	ribD	587764	588849	+	1085	2	16	0.00184332	3.13832e-07	0.656871	-17.6556	3.49424e-48	98.09	b0414	fused diaminohydroxyphosphoribosylaminopyrimidine deaminase and 5-amino-6-(5-phosphoribosylamino) uracil reductase	COG0117	H	Pyrimidine deaminase	Y	Y	Y
EC958_0553	ribE	588956	589408	+	452	0	0	0	0	1	-173.929	1.69841e-20	100	b0415	riboflavin synthase beta chain	COG0054	H	Riboflavin synthase beta-chain	Y	Y	Y
EC958_0554	nusB	589446	589847	+	401	3	64	0.0074813	0.000111098	0.181645	-9.4174	2.88884e-18	99.28	b0416	transcription antitermination protein	COG0781	K	Transcription termination factor	Y	N	N
EC958_0555	thiL	589943	590902	+	959	65	580	0.0677789	0.234856	1.94411e-07	17.4758	1.13357e-42	100	b0417	thiamin-monophosphate kinase	COG0611	H	Thiamine monophosphate kinase	N	Y	Y
EC958_0556	pgpA	590907	591398	+	491	19	178	0.0386965	0.0501161	0.00014736	6.91181	3.3437e-22	98.82	b0418	phosphatidylglycerophosphatase A	COG1267	I	Phosphatidylglycerophosphatase A and related proteins	N	N	N
EC958_0557	yajO	591470	592426	-	956	51	782	0.0533473	0.128246	5.2204e-06	12.4191	1.53343e-42	99.38	b0419	2-carboxybenzaldehyde reductase, function unknown	COG0667	C	Predicted oxidoreductases (related to aryl-alcohol dehydrogenases)	N	N	N
EC958_0558	dxs	592499	594343	-	1844	2	3	0.0010846	3.25301e-08	0.780919	-20.4018	2.216e-81	99.68	b0420	1-deoxyxylulose-5-phosphate synthase, thiamine-requiring, FAD-requiring	COG1154	HI	Deoxyxylulose-5-phosphate synthase	Y	Y	Y
EC958_0559	ispA	594386	595267	-	881	1	2	0.00113507	3.95296e-08	0.771984	-20.1702	2.92468e-39	99.33	b0421	geranyltranstransferase	COG0142	H	Geranylgeranyl pyrophosphate synthase	Y	Y	Y
EC958_0560	xseB	595285	595509	-	224	9	174	0.0401786	0.0563139	0.000105107	7.49337	1.59404e-10	100	b0422	exonuclease VII small subunit	COG1722	L	Exonuclease VII small subunit	N	N	N
EC958_0561	thiI	595733	597163	+	1430	97	1138	0.0678322	0.235286	1.92066e-07	17.494	2.84087e-63	99.38	b0423	tRNA s(4)U8 sulfurtransferase	COG0301	H	Thiamine biosynthesis ATP pyrophosphatase	N	N	N
EC958_0562	yajL	597235	597807	-	572	50	732	0.0874126	0.400903	2.21133e-09	24.0136	9.58034e-26	99.49	b0424	Oxidative-stress-resistance chaperone	COG0693	R	Putative intracellular protease/amidase	N	N	N
EC958_0563	panE	597788	598681	-	893	64	1271	0.0716685	0.266769	8.00912e-08	18.7969	8.73397e-40	99.67	b0425	2-dehydropantoate reductase, NADPH-specific	COG1893	H	Ketopantoate reductase	N	N	N
EC958_0564	yajQ	598867	599340	+	473	23	262	0.0486258	0.0991451	1.53183e-05	10.696	2.04893e-21	100	b0426	Phi6 host factor; binds ATP and GTP	COG1666	S	Uncharacterized protein conserved in bacteria	N	N	N
EC958_0565	yajR	599486	600832	-	1346	87	1354	0.064636	0.209839	3.98044e-07	16.3969	1.34127e-59	98.9	b0427	predicted transporter	COG2814	G	Arabinose efflux permease	N	N	N
EC958_0566	cyoE	600999	601871	-	872	66	656	0.0756881	0.300555	3.20318e-08	20.1473	7.23981e-39	99.66	b0428	protoheme IX farnesyltransferase	COG0109	O	Polyprenyltransferase (cytochrome oxidase assembly factor)	N	N	N
EC958_0567	cyoD	601901	602158	-	257	29	288	0.11284	0.603759	6.71207e-12	32.1256	5.74271e-12	98.9	b0429	cytochrome o ubiquinol oxidase subunit IV	COG3125	C	Heme/copper-type cytochrome/quinol oxidase, subunit 4	N	N	N
EC958_0568	cyoC	602230	602826	-	596	56	688	0.0939597	0.456237	4.9702e-10	26.1333	8.54375e-27	100	b0430	cytochrome o ubiquinol oxidase subunit III	COG1845	C	Heme/copper-type cytochrome/quinol oxidase, subunit 3	N	N	N
EC958_0569	cyoB	602834	604807	-	1973	139	1678	0.0704511	0.256683	1.05714e-07	18.385	5.04962e-87	99.85	b0431	cytochrome o ubiquinol oxidase subunit I	COG0843	C	Heme/copper-type cytochrome/quinol oxidases, subunit 1	N	N	N
EC958_0570	cyoA	604847	605749	-	902	111	1423	0.12306	0.672855	6.53071e-13	35.3096	3.52827e-40	99.67	b0432	cytochrome o ubiquinol oxidase subunit II	COG1622	C	Heme/copper-type cytochrome/quinol oxidases, subunit 2	N	N	N
EC958_0571	ampG	606254	607711	-	1457	155	2375	0.106383	0.555895	2.9259e-11	30.0939	1.87285e-64	99.59	b0433	muropeptide transporter	COG2814	G	Arabinose efflux permease	N	N	N
EC958_0572	yajG	607773	608333	-	560	69	1207	0.123214	0.673833	6.30479e-13	35.3574	3.20809e-25	100	b0434	predicted lipoprotein	COG3056	M	Uncharacterized lipoprotein	N	N	N
EC958_0573	bolA	608656	608955	+	299	44	798	0.147157	0.801392	2.6848e-15	42.6947	8.35767e-14	100	b0435	stationary-phase morphogene, transcriptional repressor for mreB; also regulator for dacA, dacC, and ampC	COG0271	T	Stress-induced morphogen (activity unknown)	N	N	N
EC958_0574	0574	608982	609152	+	170	7	93	0.0411765	0.0607139	8.37187e-05	7.88124	3.66772e-08	36.17	b0227	-	NA	NA	NA	N	N	N
EC958_0575	tig	609317	610597	+	1280	104	2451	0.08125	0.348072	9.01271e-09	21.9938	1.03342e-56	99.77	b0436	peptidyl-prolyl cis/trans isomerase (trigger factor)	COG0544	O	FKBP-type peptidyl-prolyl cis-trans isomerase (trigger factor)	N	N	N
EC958_0576	clpP	610861	611466	+	605	51	787	0.0842975	0.374231	4.49882e-09	22.9958	3.45143e-27	100	b0437	proteolytic subunit of ClpA-ClpP and ClpX-ClpP ATP-dependent serine proteases	COG0740	OU	Protease subunit of ATP-dependent Clp proteases	N	N	N
EC958_0577	clpX	611610	612866	+	1256	77	1600	0.0613057	0.184277	8.50511e-07	15.2413	1.15881e-55	99.53	b0438	ATPase and specificity subunit of ClpX-ClpP ATP-dependent serine protease	COG1219	O	ATP-dependent protease Clp, ATPase subunit	N	N	N
EC958_0578	lon	613072	615408	+	2336	188	4650	0.0804795	0.341461	1.07437e-08	21.7394	6.69975e-103	100	b0439	DNA-binding ATP-dependent protease La	COG0466	O	ATP-dependent Lon protease, bacterial type	N	N	N
EC958_0579	hupB	615635	615889	+	254	17	458	0.0669291	0.228016	2.35975e-07	17.1852	7.76843e-12	98.89	b0440	HU, DNA-binding transcriptional regulator, beta subunit	COG0776	L	Bacterial nucleoid DNA-binding protein	N	N	N
EC958_0580	ppiD	616099	617952	+	1853	135	2749	0.0728548	0.276669	6.11112e-08	19.1969	8.95201e-82	99.84	b0441	periplasmic folding chaperone, has an inactive PPIase domain	COG0760	O	Parvulin-like peptidyl-prolyl isomerase	N	N	N
EC958_0581	ybaV	618121	618474	+	353	39	1034	0.110482	0.586632	1.14928e-11	31.3854	3.63235e-16	96.75	b0442	conserved protein, ComEA homolog	COG1555	L	DNA uptake protein and related DNA-binding proteins	N	N	N
EC958_0582	fadM	618610	618990	+	380	48	1070	0.126316	0.693054	3.10863e-13	36.3168	2.39463e-17	98.48	b0443	long-chain acyl-CoA thioesterase III	COG0824	R	Predicted thioesterase	N	N	N
EC958_0583	queC	619060	619737	-	677	58	1010	0.0856721	0.386016	3.28846e-09	23.4457	2.44795e-30	99.13	b0444	required for 7-cyano-7-deazaguanine (preQ0) synthesis	COG0603	R	Predicted PP-loop superfamily ATPase	N	N	N
EC958_0584	ybaE	619820	621502	-	1682	159	3335	0.0945303	0.46099	4.36391e-10	26.3169	2.69937e-74	99.12	b0445	predicted transporter subunit: periplasmic-binding component of ABC superfamily	COG4533	R	ABC-type uncharacterized transport system, periplasmic component	N	N	N
EC958_0585	cof	621620	622420	+	800	58	1022	0.0725	0.273701	6.62606e-08	19.0774	1.02076e-35	99.63	b0446	thiamin pyrimidine pyrophosphate hydrolase; HMP-PP phosphatase	COG0561	R	Predicted hydrolases of the HAD superfamily	N	N	N
EC958_0586	ybaO	622483	623031	+	548	51	636	0.0930657	0.448764	6.09395e-10	25.8453	1.07427e-24	100	b0447	predicted DNA-binding transcriptional regulator	COG1522	K	Transcriptional regulators	N	N	N
EC958_0587	mdlA	623079	624833	+	1754	126	2038	0.0718358	0.268161	7.70943e-08	18.8534	1.91455e-77	98.47	b0448	fused predicted multidrug transporter subunits of ABC superfamily: ATP-binding components	COG1132	V	ABC-type multidrug transport system, ATPase and permease components	N	N	N
EC958_0588	mdlB	624844	626607	+	1763	116	2091	0.0657969	0.218988	3.05474e-07	16.7967	7.73422e-78	99.33	b0449	fused predicted multidrug transporter subunits of ABC superfamily: ATP-binding components	COG1132	V	ABC-type multidrug transport system, ATPase and permease components	N	N	N
EC958_0589	0589	626639	626761	-	122	7	71	0.057377	0.15563	2.08299e-06	13.8597	4.6117e-06	37.14	b1610	-	NA	NA	NA	N	N	N
EC958_0590	glnK	626806	627126	+	320	14	238	0.04375	0.0728933	4.65585e-05	8.86888	1.00825e-14	100	b0450	nitrogen assimilation regulatory protein for GlnL, GlnE, and AmtB	COG0347	E	Nitrogen regulatory protein PII	N	N	N
EC958_0591	amtB	627174	628442	+	1268	86	1509	0.0678233	0.235215	1.92453e-07	17.491	3.46055e-56	99.53	b0451	ammonium transporter	COG0004	P	Ammonia permease	N	N	N
EC958_0592	tesB	628509	629351	-	842	40	424	0.0475059	0.0927598	1.97741e-05	10.281	1.48557e-37	99.65	b0452	acyl-CoA thioesterase II	COG1946	I	Acyl-CoA thioesterase	N	N	N
EC958_0593	ybaY	629587	630141	+	554	34	590	0.0613718	0.184774	8.37788e-07	15.2643	5.87057e-25	99.47	b0453	outer membrane lipoprotein	COG3126	S	Uncharacterized protein conserved in bacteria	N	N	N
EC958_0594	ybaZ	630190	630483	-	293	14	183	0.0477816	0.0943122	1.85697e-05	10.3834	1.52939e-13	99.03	b0454	binds and enhances nucleotide excision repair of O(6)-alkylguanine; degenerate cysteine methyltransferase homolog	COG3695	L	Predicted methylated DNA-protein cysteine methyltransferase	N	N	N
EC958_0595	ybaA	630880	631215	+	335	19	370	0.0567164	0.150994	2.42159e-06	13.6252	2.2258e-15	99.15	b0456	conserved protein, DUF1428 family	COG5507	S	Uncharacterized conserved protein	N	N	N
EC958_0596	ylaB	631275	632813	-	1538	163	3043	0.105982	0.552822	3.20614e-11	29.9671	5.36607e-68	98.64	b0457	predicted cyclic-di-GMP phosphodiesterase	COG4943	T	Predicted signal transduction protein containing sensor and EAL domains	N	N	N
EC958_0597	ylaC	632989	633441	-	452	31	407	0.0685841	0.241384	1.61808e-07	17.7505	1.69841e-20	100	b0458	inner membrane protein, DUF1449 family	NA	NA	NA	N	N	N
EC958_0598	maa	633575	634108	-	533	81	1366	0.15197	0.821486	8.96114e-16	44.1527	4.86626e-24	98.36	b0459	maltose O-acetyltransferase	COG0110	R	Acetyltransferase (isoleucine patch superfamily)	N	N	N
EC958_0599	hha	634300	634500	-	200	24	189	0.12	0.653063	1.31202e-12	34.36	1.78744e-09	100	b0460	modulator of gene expression, with H-NS	NA	NA	NA	N	N	N
EC958_0600	tomB	634544	634900	-	356	46	788	0.129213	0.710278	1.60564e-13	37.2105	2.68517e-16	100	b0461	Hha toxicity attenuator; conjugation-related protein	NA	NA	NA	N	N	N
EC958_0601	acrB	635464	638595	-	3131	142	1130	0.0453529	0.0810741	3.23059e-05	9.47552	1.13156e-137	99.81	b0462	multidrug efflux system protein	COG0841	V	Cation/multidrug efflux pump	N	N	N
EC958_0602	acrA	638636	639811	-	1175	42	253	0.0357447	0.0389794	0.000288844	5.73198	4.04443e-52	99.75	b0463	multidrug efflux system	COG0845	M	Membrane-fusion protein	N	N	N
EC958_0603	acrR	639971	640501	+	530	104	2474	0.196226	0.938651	3.7172e-20	57.367	6.58282e-24	99.44	b0464	DNA-binding transcriptional repressor	COG1309	K	Transcriptional regulator	N	N	N
EC958_0604	kefA	640738	644082	+	3344	264	4807	0.0789474	0.328335	1.52354e-08	21.2323	5.46138e-147	99.2	b0465	fused conserved protein	COG3264	M	Small-conductance mechanosensitive channel	N	N	N
EC958_0605	ybaM	644139	644285	-	146	8	85	0.0547945	0.137828	3.7532e-06	12.9394	4.11272e-07	86.54	b0466	predicted protein	NA	NA	NA	N	N	N
EC958_0606	priC	644317	644826	-	509	44	793	0.086444	0.392624	2.75778e-09	23.6978	5.45667e-23	97.14	b0467	primosomal replication protein N''	COG3923	L	Primosomal replication protein N''	N	N	N
EC958_0607	ybaN	644914	645273	+	359	26	404	0.0724234	0.273061	6.7428e-08	19.0516	1.98497e-16	97.6	b0468	inner membrane protein, DUF454 family	COG2832	S	Uncharacterized protein conserved in bacteria	N	N	N
EC958_0608	apt	645444	645977	+	533	39	630	0.0731707	0.279317	5.68645e-08	19.3033	4.86626e-24	100	b0469	adenine phosphoribosyltransferase	COG0503	F	Adenine/guanine phosphoribosyltransferases and related PRPP-binding proteins	N	N	N
EC958_0609	dnaX	646124	648037	+	1913	4	31	0.00209096	5.36685e-07	0.620811	-16.9846	2.12613e-84	99.38	b0470	DNA polymerase III/DNA elongation factor III, tau and gamma subunits	COG2812	L	DNA polymerase III, gamma/tau subunits	Y	Y	Y
EC958_0610	ybaB	648108	648419	+	311	20	209	0.0643087	0.207281	4.28881e-07	16.2839	2.49585e-14	100	b0471	conserved protein	COG0718	S	Uncharacterized protein conserved in bacteria	N	N	N
EC958_0611	recR	648437	649024	+	587	43	912	0.0732538	0.280014	5.57973e-08	19.3312	2.11494e-26	100	b0472	gap repair protein	COG0353	L	Recombinational DNA repair protein (RecF pathway)	N	N	N
EC958_0612	htpG	649152	651008	+	1856	155	3017	0.0835129	0.367498	5.38005e-09	22.7385	6.61765e-82	99.84	b0473	molecular chaperone HSP90 family	COG0326	O	Molecular chaperone, HSP90 family	N	N	N
EC958_0613	adk	651207	651833	+	626	1	22	0.00159744	1.70431e-07	0.694745	-18.408	4.16374e-28	100	b0474	adenylate kinase	COG0563	F	Adenylate kinase and related kinases	Y	Y	Y
EC958_0614	hemH	651983	652927	+	944	3	56	0.00317797	3.16114e-06	0.484537	-14.6847	5.13488e-42	99.06	b0475	ferrochelatase	COG0276	H	Protoheme ferro-lyase (ferrochelatase)	Y	Y	Y
EC958_0615	aes	652942	653883	-	941	71	1313	0.0754516	0.298551	3.38058e-08	20.0683	6.94619e-42	97.49	b0476	acetyl esterase	COG0657	I	Esterase/lipase	N	N	N
EC958_0616	gsk	654053	655339	+	1286	90	1514	0.0699844	0.252839	1.17581e-07	18.2268	5.64736e-57	100	b0477	inosine/guanosine kinase	COG0524	G	Sugar kinases, ribokinase family	N	N	N
EC958_0617	ybaL	655487	657145	-	1658	120	2687	0.0723764	0.272668	6.81551e-08	19.0358	3.02688e-73	99.28	b0478	predicted transporter with NAD(P)-binding Rossmann-fold domain	COG4651	P	Kef-type K+ transport system, predicted NAD-binding component	N	N	N
EC958_0618	fsr	657402	658604	-	1202	83	1091	0.0690516	0.245194	1.45448e-07	17.9097	2.6663e-53	99.75	b0479	predicted fosmidomycin efflux system	COG2223	P	Nitrate/nitrite transporter	N	N	N
EC958_0619	ushA	658840	660474	+	1634	115	1900	0.0703794	0.256092	1.07455e-07	18.3607	3.39412e-72	100	b0480	bifunctional UDP-sugar hydrolase/5'-nucleotidase	COG0737	F	5'-nucleotidase/2',3'-cyclic phosphodiesterase and related esterases	N	N	N
EC958_0620	0620	660530	661015	-	485	112	3208	0.230928	0.975666	1.36201e-23	67.5483	6.11872e-22	17	b1549	-	NA	NA	NA	N	N	N
EC958_0621	0621	661030	661812	-	782	188	4585	0.240409	0.981297	1.56806e-24	70.3097	6.25494e-35	24.14	b3723	-	NA	NA	NA	N	N	N
EC958_0622	ybaK	661854	662315	-	461	37	474	0.0802603	0.339582	1.12941e-08	21.667	6.86108e-21	99.37	b0481	conserved protein	COG2606	S	Uncharacterized conserved protein	N	N	N
EC958_0623	ybaP	662537	663313	-	776	75	1783	0.0966495	0.478516	2.69179e-10	26.9972	1.14461e-34	99.24	b0482	conserved protein	COG3735	S	Uncharacterized protein conserved in bacteria	N	N	N
EC958_0624	ybaQ	663802	664125	+	323	12	243	0.0371517	0.0440869	0.000209577	6.29812	7.45338e-15	100	b0483	predicted DNA-binding transcriptional regulator	COG3093	R	Plasmid maintenance system antidote protein	N	N	N
EC958_0625	copA	664201	666687	-	2486	216	4375	0.0868866	0.396409	2.49309e-09	23.8422	1.84175e-109	99.04	b0484	copper transporter	COG2217	P	Cation transport ATPase	N	N	N
EC958_0626	ybaS	666967	667881	+	914	78	1158	0.0853392	0.383163	3.54779e-09	23.3369	1.05365e-40	98.39	b0485	glutaminase	COG2066	E	Glutaminase	N	N	N
EC958_0627	ybaT	667902	669176	+	1274	103	1730	0.0808477	0.34462	9.87842e-09	21.8611	1.89109e-56	99.3	b0486	predicted transporter	COG1113	E	Gamma-aminobutyrate permease and related permeases	N	N	N
EC958_0628	cueR	669319	669708	+	389	22	255	0.0565553	0.149871	2.51222e-06	13.5679	9.67363e-18	98.52	b0487	DNA-binding transcriptional activator of copper-responsive regulon genes	COG0789	K	Predicted transcriptional regulators	N	N	N
EC958_0629	0629	669727	670188	-	461	33	502	0.0715835	0.266062	8.16589e-08	18.7682	6.86108e-21	24	b2706	-	NA	NA	NA	N	N	N
EC958_0630	ybbJ	670556	670996	-	440	28	350	0.0636364	0.202056	4.99928e-07	16.0514	5.68733e-20	98	b0488	inner membrane protein that stimulates the ftsH htpX mutant suppressor activity of QmcA	COG1585	OU	Membrane protein implicated in regulation of membrane protease activity	N	N	N
EC958_0631	qmcA	671011	671910	-	899	88	1112	0.0978865	0.488649	2.03026e-10	27.3933	4.77286e-40	99.67	b0489	multicopy suppressor of ftsH htpX double mutant; membrane-anchored predicted protease with C-terminal cytoplasmic PHB domain	COG0330	O	Membrane protease subunits, stomatin/prohibitin homologs	N	N	N
EC958_0632	ybbL	672074	672733	+	659	140	2760	0.212443	0.959855	9.21482e-22	62.1407	1.50003e-29	99.11	b0490	predicted transporter subunit: ATP-binding component of ABC superfamily	COG4619	R	ABC-type uncharacterized transport system, ATPase component	N	N	N
EC958_0633	ybbM	672738	673499	+	761	172	2915	0.226018	0.97216	4.17156e-23	66.1153	5.18488e-34	100	b0491	inner membrane protein, UPF0014 family	COG0390	R	ABC-type uncharacterized transport system, permease component	N	N	N
EC958_0634	ybbN	673700	674536	-	836	70	1212	0.0837321	0.369379	5.11787e-09	22.8104	2.71848e-37	99.65	b0492	DnaK co-chaperone, thioredoxin-like protein	COG3118	O	Thioredoxin domain-containing protein	N	N	N
EC958_0635	ybbO	674615	675406	-	791	58	878	0.0733249	0.28061	5.49004e-08	19.3551	2.52682e-35	98.88	b0493	predicted oxidoreductase with NAD(P)-binding Rossmann-fold domain	COG0300	R	Short-chain dehydrogenases of various substrate specificities	N	N	N
EC958_0636	tesA	675414	676019	-	605	44	656	0.0727273	0.275602	6.29146e-08	19.154	3.45143e-27	100	b0494	multifunctional acyl-CoA thioesterase I and protease I and lysophospholipase L1	COG2755	E	Lysophospholipase L1 and related esterases	N	N	N
EC958_0637	ybbA	676008	676676	+	668	32	363	0.0479042	0.0950069	1.80577e-05	10.4289	6.05971e-30	100	b0495	predicted transporter subunit: ATP-binding component of ABC superfamily	COG4181	Q	Predicted ABC-type transport system involved in lysophospholipase L1 biosynthesis, ATPase component	N	N	N
EC958_0638	ybbP	676691	679087	+	2396	197	3721	0.0822204	0.356401	7.22391e-09	22.3136	1.59121e-105	98.38	b0496	predicted ABC transporter permease	COG3127	Q	Predicted ABC-type transport system involved in lysophospholipase L1 biosynthesis, permease component	N	N	N
EC958_0639	0639	679274	681259	+	1985	91	727	0.0458438	0.083669	2.88851e-05	9.66009	1.50797e-87	44.77	b3442	-	COG3157	S	Hemolysin-coregulated protein (uncharacterized)	N	N	N
EC958_0640	0640	681360	681623	+	263	25	213	0.095057	0.465365	3.8701e-10	26.4862	3.13822e-12	32	b0927	-	NA	NA	NA	N	N	N
EC958_0641	0641	681648	681983	+	335	29	255	0.0865672	0.393678	2.68142e-09	23.738	2.2258e-15	28.57	b2102	-	NA	NA	NA	N	N	N
EC958_0642	selU	682067	683155	-	1088	87	1307	0.0799632	0.337035	1.20856e-08	21.5687	2.58307e-48	97.79	b0503	tRNA 2-selenouridine synthase, selenophosphate-dependent	COG2603	R	Predicted ATPase	N	N	N
EC958_0643	allS	683242	684150	-	908	38	505	0.0418502	0.0637872	7.17976e-05	8.14153	1.9281e-40	99.03	b0504	DNA-binding transcriptional activator of the allD operon	COG0583	K	Transcriptional regulator	N	N	N
EC958_0644	allA	684398	684862	+	464	37	549	0.0797414	0.335134	1.27126e-08	21.4953	5.07196e-21	98.12	b0505	ureidoglycolate hydrolase	COG3194	F	Ureidoglycolate hydrolase	N	N	N
EC958_0645	allR	684958	685755	+	797	59	1096	0.0740276	0.286519	4.67731e-08	19.5912	1.38083e-35	99.63	b0506	DNA-binding transcriptional repressor for all (allantoin) and gcl (glyoxylate) operons; glyoxylate-induced	COG1414	K	Transcriptional regulator	N	N	N
EC958_0646	gcl	685863	687626	+	1763	199	5948	0.112876	0.604013	6.65825e-12	32.1367	7.73422e-78	99.33	b0507	glyoxylate carboligase	COG3960	R	Glyoxylate carboligase	N	N	N
EC958_0647	hyi	687657	688415	+	758	104	1556	0.137203	0.754107	2.59735e-14	39.6624	7.01384e-34	98.06	b0508	hydroxypyruvate isomerase	COG3622	G	Hydroxypyruvate isomerase	N	N	N
EC958_0648	glxR	688533	689393	+	860	146	2290	0.169767	0.881749	1.54921e-17	49.5049	2.42434e-38	99.32	b0509	tartronate semialdehyde reductase, NADH-dependent	COG2084	I	3-hydroxyisobutyrate dehydrogenase and related beta-hydroxyacid dehydrogenases	N	N	N
EC958_0649	ybbW	689581	691017	+	1436	200	2003	0.139276	0.764611	1.61923e-14	40.2958	1.55245e-63	99.17	b0511	predicted allantoin transporter	COG1953	FH	Cytosine/uracil/thiamine/allantoin permeases	N	N	N
EC958_0650	allB	691095	692438	+	1343	111	1571	0.0826508	0.360096	6.54868e-09	22.4552	1.81439e-59	99.34	b0512	allantoinase	COG0044	F	Dihydroorotase and related cyclic amidohydrolases	N	N	N
EC958_0651	ybbY	692512	693795	+	1283	215	4894	0.167576	0.875424	2.55329e-17	48.8489	7.63945e-57	99.31	b0513	predicted uracil/xanthine transporter	COG2233	F	Xanthine/uracil permeases	N	N	N
EC958_0652	glxK	693835	694962	+	1127	102	1546	0.0905058	0.427206	1.09238e-09	25.0182	5.08536e-50	96.85	b0514	glycerate kinase II	COG1929	G	Glycerate kinase	N	N	N
EC958_0653	ylbA	695109	695876	-	767	164	1744	0.21382	0.961301	6.73196e-22	62.5447	2.83339e-34	98.08	b0515	conserved protein	COG3257	R	Uncharacterized protein, possibly involved in glyoxylate utilization	N	N	N
EC958_0654	allC	695905	697122	-	1217	253	4659	0.207888	0.954708	2.60312e-21	60.8029	5.88607e-54	99.27	b0516	allantoate amidohydrolase	COG0624	E	Acetylornithine deacetylase/Succinyl-diaminopimelate desuccinylase and related deacylases	N	N	N
EC958_0655	allD	697162	698193	-	1031	98	861	0.0950533	0.465334	3.87335e-10	26.4851	8.03991e-46	98.57	b0517	ureidoglycolate dehydrogenase	COG2055	C	Malate/L-lactate dehydrogenases	N	N	N
EC958_0656	fdrA	698528	700177	+	1649	141	2313	0.0855064	0.384596	3.41509e-09	23.3915	7.49281e-73	98.2	b0518	multicopy suppressor of dominant negative ftsH mutations; predicted acyl-CoA synthetase with NAD(P)-binding Rossmann-fold domain	COG0074	C	Succinyl-CoA synthetase, alpha subunit	N	N	N
EC958_0657	0657	700205	701446	+	1241	92	1698	0.0741338	0.287413	4.56546e-08	19.6268	5.2492e-55	45.17	b0321	-	NA	NA	NA	N	N	N
EC958_0658	ylbF	701475	702272	+	797	64	937	0.0803011	0.339932	1.11895e-08	21.6805	1.38083e-35	98.89	b0520	conserved protein	NA	NA	NA	N	N	N
EC958_0659	ybcF	702287	703162	+	875	75	1077	0.0857143	0.386377	3.25697e-09	23.4595	5.35193e-39	98.99	b0521	predicted carbamate kinase	COG0549	E	Carbamate kinase	N	N	N
EC958_0660	purK	703714	704763	-	1049	64	978	0.0610105	0.182064	9.09734e-07	15.1382	1.31205e-46	98.31	b0522	N5-carboxyaminoimidazole ribonucleotide synthase	COG0026	F	Phosphoribosylaminoimidazole carboxylase (NCAIR synthetase)	N	N	N
EC958_0661	purE	704778	705269	-	491	54	914	0.10998	0.582933	1.28863e-11	31.2276	3.3437e-22	100	b0523	N5-carboxyaminoimidazole ribonucleotide mutase	COG0041	F	Phosphoribosylcarboxyaminoimidazole (NCAIR) mutase	N	N	N
EC958_0662	0662	705383	705694	-	311	78	1317	0.250804	0.986048	1.46593e-25	73.3286	2.49585e-14	33.33	b0380	-	NA	NA	NA	N	N	N
EC958_0663	lpxH	705823	706491	-	668	2	59	0.00299401	2.45787e-06	0.505291	-15.0202	6.05971e-30	99.12	b0524	UDP-2,3-diacylglucosamine pyrophosphatase	COG2908	S	Uncharacterized protein conserved in bacteria	Y	Y	Y
EC958_0664	ppiB	706548	707024	-	476	11	81	0.0231092	0.00880269	0.00514977	0.219349	1.51464e-21	98.78	b0525	peptidyl-prolyl cis-trans isomerase B (rotamase B)	COG0652	O	Peptidyl-prolyl cis-trans isomerase (rotamase) - cyclophilin family	N	N	N
EC958_0665	cysS	707216	708583	+	1367	1	1	0.000731529	6.00225e-09	0.846381	-22.3841	1.61808e-60	99.57	b0526	cysteinyl-tRNA synthetase	COG0215	J	Cysteinyl-tRNA synthetase	Y	Y	Y
EC958_0666	ybcI	708637	709140	-	503	48	991	0.0954274	0.468434	3.55669e-10	26.6052	9.9853e-23	98.27	b0527	inner membrane protein, DUF457 family	COG1988	R	Predicted membrane-bound metal-dependent hydrolases	N	N	N
EC958_0667	ybcJ	709266	709460	-	194	9	260	0.0463918	0.0866141	2.5493e-05	9.86545	3.27088e-09	98.57	b0528	Ribosome-associated protein; predicted RNA-binding protein	COG2501	S	Uncharacterized conserved protein	N	N	N
EC958_0668	folD	709480	710328	-	848	12	113	0.0141509	0.0014072	0.0397021	-4.55712	8.1182e-38	99.31	b0529	bifunctional 5,10-methylene-tetrahydrofolate dehydrogenase/ 5,10-methylene-tetrahydrofolate cyclohydrolase	COG0190	H	5,10-methylene-tetrahydrofolate dehydrogenase/Methenyl tetrahydrofolate cyclohydrolase	Y	Y	Y
EC958_0669	0669	710399	710533	-	134	13	290	0.0970149	0.481517	2.47661e-10	27.1143	1.37719e-06	45.45	b0535	-	NA	NA	NA	N	N	N
EC958_0670	intD	711032	711313	-	281	33	759	0.117438	0.635893	2.35315e-12	33.5624	5.12135e-13	79.12	b0537	DLP12 prophage; predicted integrase	NA	NA	NA	N	N	N
EC958_0671	tfaQ	711338	711676	+	338	51	1038	0.150888	0.817118	1.14694e-15	43.8252	1.6454e-15	68	b1546	Qin prophage; predicted tail fibre assembly protein	COG5525	R	Bacteriophage tail assembly protein	N	N	N
EC958_0672	0672	711749	712315	-	566	101	1773	0.178445	0.904136	2.14219e-18	52.0947	1.75313e-25	22.82	b4371	-	COG2226	H	Methylase involved in ubiquinone/menaquinone biosynthesis	N	N	N
EC958_0673	ompT	712649	713584	-	935	219	3125	0.234225	0.977784	6.42309e-24	68.5093	1.2711e-41	99.05	b0565	DLP12 prophage; outer membrane protease VII (outer membrane protein 3b)	COG4571	M	Outer membrane protease	N	N	N
EC958_0674	ybcH	714250	715122	-	872	100	1823	0.114679	0.616811	4.41388e-12	32.7011	7.23981e-39	96.62	b0567	predicted protein	NA	NA	NA	N	N	N
EC958_0675	nfrA	715141	718095	-	2954	303	5149	0.102573	0.526284	6.97483e-11	28.8869	6.24385e-130	98.69	b0568	bacteriophage N4 receptor, outer membrane subunit	COG5010	U	Flp pilus assembly protein TadD, contains TPR repeats	N	N	N
EC958_0676	nfrB	718100	720319	-	2219	191	3766	0.0860748	0.389464	2.99997e-09	23.5773	8.78018e-98	99.6	b0569	bacteriophage N4 receptor, inner membrane subunit	COG1215	M	Glycosyltransferases, probably involved in cell wall biogenesis	N	N	N
EC958_0677	cusS	720487	721911	-	1424	96	1386	0.0674157	0.231926	2.11196e-07	17.3517	5.19858e-63	98.75	b0570	sensory histidine kinase in two-component regulatory system with CusR, senses copper ions	COG0642	T	Signal transduction histidine kinase	N	N	N
EC958_0678	cusR	721919	722584	-	665	41	740	0.0616541	0.1869	7.85565e-07	15.3628	8.19725e-30	100	b0571	DNA-binding response regulator in two-component regulatory system with CusS	COG0745	TK	Response regulators consisting of a CheY-like receiver domain and a winged-helix DNA-binding domain	N	N	N
EC958_0679	cusC	722759	724123	+	1364	295	6007	0.216276	0.963761	3.84589e-22	63.2647	2.18885e-60	98.91	b0572	copper/silver efflux system, outer membrane component	COG1538	MU	Outer membrane protein	N	N	N
EC958_0680	cusF	724165	724479	+	314	80	2049	0.254777	0.987541	5.92511e-26	74.4803	1.84503e-14	99.09	b0573	periplasmic copper- and silver-binding protein	COG5569	S	Uncharacterized conserved protein	N	N	N
EC958_0681	cusB	724513	725718	+	1205	120	1982	0.0995851	0.502433	1.37838e-10	27.9359	1.97102e-53	98.03	b0574	copper/silver efflux system, membrane fusion protein	COG0845	M	Membrane-fusion protein	N	N	N
EC958_0682	cusA	725748	728873	+	3125	216	3864	0.06912	0.245753	1.43197e-07	17.933	2.07066e-137	99.24	b0575	copper/silver efflux system, membrane component	COG3696	P	Putative silver efflux pump	N	N	N
EC958_0683	pheP	728993	730357	+	1364	120	2185	0.0879765	0.405715	1.94452e-09	24.1972	2.18885e-60	99.56	b0576	phenylalanine transporter	COG1113	E	Gamma-aminobutyrate permease and related permeases	N	N	N
EC958_0684	ybdG	730533	731762	-	1229	306	8559	0.248983	0.985308	2.22033e-25	72.8003	1.75776e-54	99.76	b0577	predicted mechanosensitive channel	COG0668	M	Small-conductance mechanosensitive channel	N	N	N
EC958_0685	nfsB	731888	732523	-	635	64	1472	0.100787	0.512094	1.04789e-10	28.3191	1.68203e-28	98.62	b0578	dihydropteridine reductase, NAD(P)H-dependent, oxygen-insensitive	COG0778	C	Nitroreductase	N	N	N
EC958_0686	ybdF	732620	732985	-	365	22	513	0.060274	0.176584	1.07607e-06	14.8804	1.08473e-16	99.17	b0579	conserved protein	COG2315	S	Uncharacterized protein conserved in bacteria	N	N	N
EC958_0687	ybdJ	733068	733298	-	230	19	276	0.0826087	0.359735	6.61182e-09	22.4414	8.71095e-11	97.56	b0580	predicted inner membrane protein	NA	NA	NA	N	N	N
EC958_0688	ybdK	733382	734482	-	1100	99	2250	0.09	0.422922	1.2259e-09	24.8543	7.71384e-49	97.85	b0581	weak gamma-glutamyl:cysteine ligase	COG2170	S	Uncharacterized conserved protein	N	N	N
EC958_0689	hokE	734943	735077	+	134	32	623	0.238806	0.98044	2.26001e-24	69.8433	1.37719e-06	100	b4415	toxic polypeptide, small	NA	NA	NA	N	N	N
EC958_0690	hokE	735445	735579	+	134	34	455	0.253731	0.987164	7.52041e-26	74.1773	1.37719e-06	98	b4415	toxic polypeptide, small	NA	NA	NA	N	N	N
EC958_0691	0691	735707	736474	-	767	72	1331	0.0938722	0.455507	5.07035e-10	26.1052	2.83339e-34	36.11	b2842	-	COG1028	IQR	Dehydrogenases with different specificities (related to short-chain alcohol dehydrogenases)	N	N	N
EC958_0692	0692	736525	737304	-	779	79	1614	0.101412	0.517081	9.08792e-11	28.5179	8.46135e-35	34.75	b2426	-	COG1028	IQR	Dehydrogenases with different specificities (related to short-chain alcohol dehydrogenases)	N	N	N
EC958_0693	0693	737376	738425	-	1049	98	1954	0.0934223	0.451749	5.61808e-10	25.9603	1.31205e-46	40.06	b3750	-	COG1172	G	Ribose/xylose/arabinose/galactoside ABC-type transport systems, permease components	N	N	N
EC958_0694	0694	738461	739987	-	1526	169	3126	0.110747	0.58858	1.08178e-11	31.4688	1.7969e-67	41.24	b3567	-	COG1129	G	ABC-type sugar transport system, ATPase component	N	N	N
EC958_0695	0695	740007	740609	-	602	125	1728	0.207641	0.954412	2.75396e-21	60.7303	4.66891e-27	23.94	b1846	-	COG5618	R	Predicted periplasmic lipoprotein	N	N	N
EC958_0696	0696	740674	741591	-	917	158	2743	0.172301	0.888713	8.69451e-18	50.2622	7.78896e-41	34.39	b3751	-	COG1879	G	ABC-type sugar transport system, periplasmic component	N	N	N
EC958_0697	0697	741713	743215	-	1502	197	3551	0.131158	0.721441	1.03053e-13	37.809	2.01491e-66	39.84	b3926	-	COG0554	C	Glycerol kinase	N	N	N
EC958_0698	0698	743584	744516	-	932	55	629	0.0590129	0.167342	1.43454e-06	14.4375	1.71948e-41	26.67	b1512	-	COG2390	K	Transcriptional regulator, contains sigma factor-related N-terminal domain	N	N	N
EC958_0699	0699	744897	745709	+	812	74	1769	0.091133	0.432508	9.46821e-10	25.2212	3.0483e-36	35.13	b2465	-	COG3959	G	Transketolase, N-terminal subunit	N	N	N
EC958_0700	0700	745720	746637	+	917	70	1455	0.0763359	0.306055	2.76336e-08	20.3636	7.78896e-41	29.83	b0420	-	COG3958	G	Transketolase, C-terminal subunit	N	N	N
EC958_0701	entD	746657	747448	-	791	69	1453	0.0872314	0.399355	2.30462e-09	23.9546	2.52682e-35	84.21	b0583	phosphopantetheinyltransferase component of enterobactin synthase multienzyme complex	COG2977	Q	Phosphopantetheinyl transferase component of siderophore synthetase	N	Y	Y
EC958_0702	fepA	747491	749713	-	2222	210	3725	0.0945095	0.460816	4.38472e-10	26.3102	6.49063e-98	99.06	b0584	iron-enterobactin outer membrane transporter	COG4771	P	Outer membrane receptor for ferrienterochelin and colicins	N	N	N
EC958_0703	0703	749724	749837	+	113	4	49	0.0353982	0.0377778	0.000312585	5.59147	1.14159e-05	31.82	b1492	-	NA	NA	NA	N	N	N
EC958_0704	fes	749974	751158	+	1184	89	1502	0.0751689	0.296156	3.60568e-08	19.9737	1.63383e-52	94.39	b0585	enterobactin/ferric enterobactin esterase	COG2382	P	Enterochelin esterase and related enzymes	N	N	N
EC958_0705	ybdZ	751179	751379	+	200	12	278	0.06	0.174561	1.14543e-06	14.7844	1.78744e-09	95.83	b4511	conserved protein	COG3251	S	Uncharacterized protein conserved in bacteria	N	N	N
EC958_0706	entF	751394	755257	+	3863	349	6840	0.0903443	0.425839	1.13335e-09	24.9659	1.08853e-169	97.06	b0586	enterobactin synthase multienzyme complex component, ATP-dependent	COG1020	Q	Non-ribosomal peptide synthetase modules and related proteins	N	N	N
EC958_0707	fepE	755522	756637	+	1115	116	1687	0.104036	0.537766	4.99646e-11	29.3512	1.7029e-49	95.49	b0587	regulator of length of O-antigen component of lipopolysaccharide chains	COG3765	M	Chain length determinant protein	N	N	N
EC958_0708	fepC	756652	757449	-	797	48	623	0.0602258	0.176228	1.08795e-06	14.8636	1.38083e-35	99.63	b0588	iron-enterobactin transporter subunit	COG1120	PH	ABC-type cobalamin/Fe3+-siderophores transport systems, ATPase components	N	N	N
EC958_0709	fepG	757464	758438	-	974	66	923	0.0677618	0.234718	1.95172e-07	17.47	2.50245e-43	97.88	b0589	iron-enterobactin transporter subunit	COG4779	P	ABC-type enterobactin transport system, permease component	N	N	N
EC958_0710	fepD	758453	759439	-	986	80	1244	0.0811359	0.347092	9.25024e-09	21.9562	7.47307e-44	98.8	b0590	iron-enterobactin transporter subunit	COG0609	P	ABC-type Fe3+-siderophore transport system, permease component	N	N	N
EC958_0711	entS	759568	760800	+	1232	100	1665	0.0811688	0.347375	9.18105e-09	21.967	1.2994e-54	98.56	b0591	enterobactin exporter, iron-regulated	COG2814	G	Arabinose efflux permease	N	N	N
EC958_0712	fepB	760822	761760	-	938	53	910	0.0565032	0.149509	2.54222e-06	13.5494	9.39644e-42	98.43	b0592	iron-enterobactin transporter subunit	COG4592	P	ABC-type Fe2+-enterobactin transport system, periplasmic component	N	N	N
EC958_0713	entC	761967	763124	+	1157	88	1563	0.0760588	0.303701	2.94358e-08	20.2711	2.47831e-51	99.74	b0593	isochorismate synthase 1	COG1169	HQ	Isochorismate synthase	N	N	N
EC958_0714	entE	763152	764744	+	1592	136	2796	0.0854271	0.383917	3.47734e-09	23.3656	2.33216e-70	99.25	b0594	2,3-dihydroxybenzoate-AMP ligase component of enterobactin synthase multienzyme complex	COG1021	Q	Peptide arylation enzymes	N	N	N
EC958_0715	entB	764776	765615	+	839	65	1017	0.0774732	0.315739	2.13219e-08	20.7426	2.0096e-37	99.65	b0595	isochorismatase	COG1535	Q	Isochorismate hydrolase	N	N	N
EC958_0716	entA	765633	766361	+	728	59	1047	0.081044	0.346303	9.4462e-09	21.9258	1.4392e-32	98.79	b0596	2,3-dihydro-2,3-dihydroxybenzoate dehydrogenase	COG1028	IQR	Dehydrogenases with different specificities (related to short-chain alcohol dehydrogenases)	N	N	N
EC958_0717	entH	766382	766777	+	395	36	684	0.0911392	0.432561	9.45476e-10	25.2232	5.28635e-18	100	b0597	thioesterase required for efficient enterobactin production	COG2050	Q	Uncharacterized protein, possibly involved in aromatic compounds catabolism	N	N	N
EC958_0718	cstA	766976	769063	+	2087	183	3746	0.0876857	0.403234	2.07784e-09	24.1025	5.21232e-92	99.43	b0598	carbon starvation protein	COG1966	T	Carbon starvation protein, predicted membrane protein	N	N	N
EC958_0719	ybdD	769194	769373	+	179	7	188	0.0391061	0.0517887	0.000134221	7.07323	1.48165e-08	100	b4512	conserved protein, DUF466 family	COG2879	S	Uncharacterized small protein	N	N	N
EC958_0720	ybdH	769401	770471	-	1070	66	811	0.0616822	0.187112	7.80547e-07	15.3726	1.58284e-47	97.79	b0599	predicted oxidoreductase	COG0371	C	Glycerol dehydrogenase and related enzymes	N	N	N
EC958_0721	ybdL	770598	771740	+	1142	81	1141	0.0709282	0.260626	9.4818e-08	18.5466	1.12264e-50	97.93	b0600	methionine aminotransferase, PLP-dependent	COG0436	E	Aspartate/tyrosine/aromatic aminotransferase	N	N	N
EC958_0722	ybdM	771759	772358	-	599	45	769	0.0751252	0.295786	3.64179e-08	19.959	6.31585e-27	98.05	b0601	conserved protein	COG1475	K	Predicted transcriptional regulators	N	N	N
EC958_0723	ybdN	772361	773563	-	1202	159	2586	0.13228	0.72773	7.98096e-14	38.1535	2.6663e-53	97.04	b0602	conserved protein	COG3969	R	Predicted phosphoadenosine phosphosulfate sulfotransferase	N	N	N
EC958_0724	ybdO	773728	774612	-	884	37	278	0.0418552	0.0638102	7.1716e-05	8.14345	2.16203e-39	88.67	b0603	predicted DNA-binding transcriptional regulator	COG0583	K	Transcriptional regulator	N	N	N
EC958_0725	dsbG	774835	775563	-	728	105	2089	0.144231	0.788309	5.23212e-15	41.8056	1.4392e-32	99.19	b0604	thiol:disulfide interchange protein, periplasmic	COG1651	O	Protein-disulfide isomerase	N	N	N
EC958_0726	ahpC	775953	776498	+	545	33	838	0.0605505	0.178635	1.01033e-06	14.9773	1.45321e-24	100	b0605	alkyl hydroperoxide reductase, C22 subunit	COG0450	O	Peroxiredoxin	N	N	N
EC958_0727	ahpF	776687	778234	+	1547	93	1596	0.0601164	0.175419	1.11545e-06	14.8252	2.16774e-68	100	b0606	alkyl hydroperoxide reductase, F52a subunit, FAD/NAD(P)-binding	COG3634	O	Alkyl hydroperoxide reductase, large subunit	N	N	N
EC958_0728	uspG	778373	778783	-	410	33	455	0.0804878	0.341532	1.07232e-08	21.7422	1.16701e-18	97.18	b0607	universal stress protein UP12	COG0589	T	Universal stress protein UspA and related nucleotide-binding proteins	N	N	N
EC958_0729	rnk	779223	779552	-	329	18	268	0.0547112	0.137269	3.82514e-06	12.9095	4.07305e-15	100	b0610	regulator of nucleoside diphosphate kinase	COG0782	K	Transcription elongation factor	N	N	N
EC958_0730	rna	779800	780588	-	788	50	812	0.0634518	0.200628	5.21417e-07	15.9875	3.41814e-35	99.63	b0611	ribonuclease I	COG3719	J	Ribonuclease I	N	N	N
EC958_0731	citT	780720	782132	-	1412	133	2948	0.0941926	0.458179	4.71316e-10	26.2083	1.74081e-62	99.79	b0612	citrate:succinate antiporter	COG0471	P	Di- and tricarboxylate transporters	N	N	N
EC958_0732	citG	782234	783088	-	854	66	1032	0.0772834	0.314121	2.22648e-08	20.6794	4.43636e-38	98.28	b0613	2-(5''-triphosphoribosyl)-3'-dephosphocoenzyme-A synthase	COG1767	H	Triphosphoribosyl-dephospho-CoA synthetase	N	N	N
EC958_0733	citX	783087	783620	-	533	41	640	0.0769231	0.311051	2.4171e-08	20.5594	4.86626e-24	98.91	b0614	apo-citrate lyase phosphoribosyl-dephospho-CoA transferase	COG3697	HI	Phosphoribosyl-dephospho-CoA transferase (holo-ACP synthetase)	N	N	N
EC958_0734	citF	783642	785156	-	1514	118	2072	0.0779392	0.319717	1.91725e-08	20.8976	6.01712e-67	99.22	b0615	citrate lyase, citrate-ACP transferase (alpha) subunit	COG3051	C	Citrate lyase, alpha subunit	N	N	N
EC958_0735	citE	785185	786075	-	890	47	603	0.052809	0.124758	5.90206e-06	12.2246	1.18148e-39	100	b0616	citrate lyase, citryl-ACP lyase (beta) subunit	COG2301	G	Citrate lyase beta subunit	N	N	N
EC958_0736	citD	786090	786368	-	278	23	218	0.0827338	0.360809	6.42587e-09	22.4825	6.92789e-13	100	b0617	citrate lyase, acyl carrier (gamma) subunit	COG3052	C	Citrate lyase, gamma subunit	N	N	N
EC958_0737	citC	786401	787441	-	1040	84	713	0.0807692	0.343946	1.00568e-08	21.8351	3.24789e-46	100	b0618	[citrate [pro-3S]-lyase] ligase	COG3053	C	Citrate lyase synthetase	N	N	N
EC958_0738	dpiB	787839	789479	+	1640	133	2052	0.0810976	0.346763	9.33145e-09	21.9435	1.85479e-72	98.73	b0619	sensory histidine kinase in two-component regulatory system with citB	COG3290	T	Signal transduction histidine kinase regulating citrate/malate metabolism	N	N	N
EC958_0739	dpiA	789466	790128	+	662	93	1647	0.140483	0.770568	1.22951e-14	40.6643	1.10888e-29	100	b0620	DNA-binding response regulator in two-component regulatory system with citA	COG4565	KT	Response regulator of citrate/malate metabolism	N	N	N
EC958_0740	dcuC	790187	791554	-	1367	142	2055	0.103877	0.536527	5.18064e-11	29.3008	1.61808e-60	99.78	b0621	anaerobic C4-dicarboxylate transport	COG3069	C	C4-dicarboxylate transporter	N	N	N
EC958_0741	pagP	792159	792701	+	542	77	1848	0.142066	0.7782	8.57009e-15	41.1468	1.96583e-24	98.39	b0622	phospholipid:lipid A palmitoyltransferase	NA	NA	NA	N	N	N
EC958_0742	cspE	792894	793085	+	191	17	283	0.0890052	0.414475	1.53799e-09	24.5316	4.42467e-09	100	b0623	DNA-binding transcriptional repressor	COG1278	K	Cold shock proteins	N	N	N
EC958_0743	crcB	793157	793522	-	365	14	208	0.0383562	0.0487499	0.000159251	6.77728	1.08473e-16	97.64	b0624	inner membrane protein associated with chromosome condensation	COG0239	D	Integral membrane protein possibly involved in chromosome condensation	N	N	N
EC958_0744	0744	793633	794403	+	770	46	793	0.0597403	0.172651	1.21531e-06	14.6932	2.09454e-34	26.24	b0219	-	COG0388	R	Predicted amidohydrolase	N	N	N
EC958_0745	tatE	794550	794735	+	185	15	257	0.0810811	0.346622	9.36658e-09	21.9381	8.09681e-09	100	b0627	TatABCE protein translocation system subunit	COG1826	U	Sec-independent protein secretion pathway components	N	N	N
EC958_0746	lipA	794853	795800	-	947	9	23	0.0095037	0.000292616	0.114544	-7.72325	3.79589e-42	100	b0628	lipoate synthase	COG0320	H	Lipoate synthase	Y	N	N
EC958_0747	ybeF	796050	796565	-	515	94	2813	0.182524	0.913304	8.45208e-19	53.308	2.98191e-23	82.29	b0629	predicted DNA-binding transcriptional regulator	COG0583	K	Transcriptional regulator	N	N	N
EC958_0748	lipB	796843	797466	-	623	29	91	0.046549	0.0874685	2.45954e-05	9.92424	5.63248e-28	99.06	b0630	lipoyl-protein ligase	COG0321	H	Lipoate-protein ligase B	N	N	N
EC958_0749	ybeD	797585	797830	-	245	8	29	0.0326531	0.0290349	0.000584503	4.46105	1.92302e-11	100	b0631	conserved protein, UPF0250 family	COG2921	S	Uncharacterized conserved protein	N	N	N
EC958_0750	dacA	797958	799151	-	1193	75	1358	0.0628667	0.196126	5.9582e-07	15.7846	6.60021e-53	100	b0632	D-alanyl-D-alanine carboxypeptidase (penicillin-binding protein 5)	COG1686	M	D-alanyl-D-alanine carboxypeptidase	N	N	N
EC958_0751	0751	799207	799314	+	107	7	72	0.0654206	0.216009	3.32845e-07	16.6673	2.08902e-05	44.83	b1924	-	NA	NA	NA	N	N	N
EC958_0752	rlpA	799309	800379	-	1070	48	683	0.0448598	0.0785096	3.615e-05	9.28956	1.58284e-47	99.17	b0633	septal ring protein, suppressor of prc, minor lipoprotein	COG0797	M	Lipoproteins	N	N	N
EC958_0753	mrdB	800408	801502	-	1094	11	48	0.0100548	0.000366738	0.101018	-7.30387	1.41157e-48	99.73	b0634	cell wall shape-determining protein	COG0772	D	Bacterial cell division membrane protein	Y	Y	Y
EC958_0754	mrdA	801523	803406	-	1883	22	57	0.0116835	0.000665668	0.0696842	-6.14349	4.3627e-83	100	b0635	transpeptidase involved in peptidoglycan synthesis (penicillin-binding protein 2)	COG0768	M	Cell division protein FtsI/penicillin-binding protein 2	Y	Y	Y
EC958_0755	rlmH	803455	803904	-	449	17	271	0.0378619	0.046804	0.000178246	6.58125	2.29752e-20	99.35	b0636	23S rRNA m(3)Psi1915 pseudouridine methyltransferase; SAM-dependent	COG1576	S	Uncharacterized conserved protein	N	N	N
EC958_0756	ybeB	803926	804225	-	299	17	295	0.0568562	0.15197	2.34564e-06	13.6749	8.35767e-14	99.05	b0637	ribosome-associated protein	COG0799	S	Uncharacterized homolog of plant Iojap protein	N	N	N
EC958_0757	cobC	804503	805096	-	593	49	889	0.0826307	0.359924	6.57875e-09	22.4486	1.15575e-26	96.55	b0638	predicted alpha-ribazole-5'-P phosphatase	COG0406	G	Fructose-2,6-bisphosphatase	N	N	N
EC958_0758	nadD	805138	805761	-	623	4	9	0.00642055	5.93905e-05	0.231343	-10.4373	5.63248e-28	99.53	b0639	nicotinic acid mononucleotide adenylyltransferase, NAD(P)-dependent	COG1057	H	Nicotinic acid mononucleotide adenylyltransferase	Y	Y	Y
EC958_0759	holA	805781	806785	-	1004	7	85	0.00697211	8.32916e-05	0.204005	-9.89302	1.21955e-44	99.41	b0640	DNA polymerase III, delta subunit	COG1466	L	DNA polymerase III, delta subunit	Y	Y	Y
EC958_0760	lptE	806812	807375	-	563	2	12	0.0035524	5.05301e-06	0.444889	-14.0497	2.37154e-25	99.48	b0641	LPS assembly OM complex LptDE, lipoprotein component	COG2980	M	Rare lipoprotein B	Y	Y	Y
EC958_0761	leuS	807408	809972	-	2564	4	44	0.00156006	1.54045e-07	0.700692	-18.5315	7.13841e-113	99.65	b0642	leucyl-tRNA synthetase	COG0495	J	Leucyl-tRNA synthetase	Y	Y	Y
EC958_0762	ybeL	810225	810689	+	464	56	871	0.12069	0.657592	1.12112e-12	34.5743	5.07196e-21	100	b0643	conserved protein, DUF1451 family	NA	NA	NA	N	N	N
EC958_0763	ybeQ	810777	810884	-	107	12	226	0.11215	0.598786	7.85726e-12	31.909	2.08902e-05	97.56	b0644	conserved protein	NA	NA	NA	N	N	N
EC958_0764	ybeQ	810957	811079	-	122	17	553	0.139344	0.764952	1.59414e-14	40.3167	4.6117e-06	97.83	b0644	conserved protein	COG0790	R	FOG: TPR repeat, SEL1 subfamily	N	N	N
EC958_0765	ybeT	811252	811788	-	536	117	2074	0.218284	0.965664	2.4332e-22	63.8529	3.59732e-24	98.37	b0647	conserved protein, Sel1 family	COG0790	R	FOG: TPR repeat, SEL1 subfamily	N	N	N
EC958_0766	ybeU	811908	812597	+	689	132	1877	0.191582	0.930927	1.07175e-19	55.9939	7.31031e-31	97.45	b0648	conserved protein, DUF1266 family	NA	NA	NA	N	N	N
EC958_0767	djlC	812612	814045	+	1433	175	2913	0.122121	0.666868	8.08877e-13	35.0187	2.10008e-63	95.45	b0649	Hsc56 co-chaperone of HscC	NA	NA	NA	N	N	N
EC958_0768	hscC	814123	815775	-	1652	184	2235	0.11138	0.593206	9.36383e-12	31.6676	5.53896e-73	98.2	b0650	Hsp70 family chaperone Hsc62, binds to RpoD and inhibits transcription	COG0443	O	Molecular chaperone	N	N	N
EC958_0769	rihA	815877	816794	-	917	113	1597	0.123228	0.67392	6.28522e-13	35.3616	7.78896e-41	98.71	b0651	ribonucleoside hydrolase 1	COG1957	F	Inosine-uridine nucleoside N-ribohydrolase	N	N	N
EC958_0770	gltL	816930	817637	-	707	29	463	0.0410184	0.0600047	8.67912e-05	7.81999	1.19299e-31	98.76	b0652	glutamate and aspartate transporter subunit	COG1126	E	ABC-type polar amino acid transport system, ATPase component	N	N	N
EC958_0771	gltK	817655	818311	-	656	60	1225	0.0914634	0.435296	8.78116e-10	25.328	2.02917e-29	100	b0653	glutamate and aspartate transporter subunit	COG0765	E	ABC-type amino acid transport system, permease component	N	N	N
EC958_0772	gltJ	818329	819051	-	722	63	977	0.0872576	0.399579	2.29086e-09	23.9631	2.63363e-32	100	b0654	glutamate and aspartate transporter subunit	COG0765	E	ABC-type amino acid transport system, permease component	N	N	N
EC958_0773	gltI	819239	820129	-	890	56	719	0.0629213	0.196545	5.88446e-07	15.8036	1.18148e-39	98.34	b0655	glutamate and aspartate transporter subunit	COG0834	ET	ABC-type amino acid transport/signal transduction systems, periplasmic component/domain	N	N	N
EC958_0774	0774	820601	822460	+	1859	185	3280	0.0995159	0.501874	1.4003e-10	27.9138	4.89201e-82	24.34	b3424	-	COG0705	R	Uncharacterized membrane protein (homolog of Drosophila rhomboid)	N	N	N
EC958_0775	lnt	822605	824125	-	1520	6	53	0.00394737	7.86673e-06	0.406577	-13.4376	3.28818e-67	98.05	b0657	apolipoprotein N-acyltransferase	COG0815	M	Apolipoprotein N-acyltransferase	Y	Y	Y
EC958_0776	ybeX	824168	825028	-	860	71	1014	0.0825581	0.359301	6.68847e-09	22.4247	2.42434e-38	100	b0658	predicteed ion transport	COG4535	P	Putative Mg2+ and Co2+ transporter CorC	N	N	N
EC958_0777	ybeY	825136	825585	-	449	7	14	0.0155902	0.0020421	0.0285958	-3.70319	2.29752e-20	99.35	b0659	metal-binding heat shock protein required for translation at 42 degrees	COG0319	R	Predicted metal-dependent hydrolase	Y	N	N
EC958_0778	ybeZ	825600	826622	-	1022	66	742	0.0645793	0.209395	4.03223e-07	16.3773	1.99022e-45	99.71	b0660	predicted protein with nucleoside triphosphate hydrolase domain	COG1702	T	Phosphate starvation-inducible protein PhoH, predicted ATPase	N	N	N
EC958_0779	miaB	826793	828199	-	1406	105	1972	0.0746799	0.292022	4.03091e-08	19.8099	3.18555e-62	99.58	b0661	tRNA-i(6)A37 methylthiotransferase	COG0621	J	2-methylthioadenine synthetase	N	N	N
EC958_0780	ubiF	828363	829520	+	1157	32	118	0.0276577	0.0165724	0.00182562	2.31234	2.47831e-51	97.44	b0662	2-octaprenyl-3-methyl-6-methoxy-1,4-benzoquinol oxygenase	COG0654	HC	2-polyprenyl-6-methoxyphenol hydroxylase and related FAD-dependent oxidoreductases	N	N	N
EC958_0781	0781	830732	831151	+	419	70	1197	0.167064	0.873907	2.86915e-17	48.6957	4.71437e-19	27.4	b4117	-	NA	NA	NA	N	N	N
EC958_0782	asnB	831211	832857	-	1646	146	2887	0.0886999	0.411878	1.64888e-09	24.4324	1.01359e-72	100	b0674	asparagine synthetase B	COG0367	E	Asparagine synthase (glutamine-hydrolyzing)	N	N	N
EC958_0783	nagD	833131	833865	-	734	57	1046	0.0776567	0.317305	2.04482e-08	20.8036	7.8648e-33	100	b0675	UMP phosphatase	COG0647	G	Predicted sugar phosphatases of the HAD superfamily	N	N	N
EC958_0784	nagC	833931	835133	-	1202	98	1567	0.0815308	0.350481	8.45382e-09	22.0864	2.6663e-53	100	b0676	DNA-binding transcriptional dual regulator, repressor of N-acetylglucosamine	COG1940	KG	Transcriptional regulator/sugar kinase	N	N	N
EC958_0785	nagA	835160	836290	-	1130	74	1119	0.0654867	0.216532	3.27861e-07	16.69	3.75929e-50	99.74	b0677	N-acetylglucosamine-6-phosphate deacetylase	COG1820	G	N-acetylglucosamine-6-phosphate deacetylase	N	N	N
EC958_0786	nagB	836368	837150	-	782	61	1180	0.0780051	0.320279	1.88866e-08	20.9195	6.25494e-35	100	b0678	glucosamine-6-phosphate deaminase	COG0363	G	6-phosphogluconolactonase/Glucosamine-6-phosphate isomerase/deaminase	N	N	N
EC958_0787	0787	837217	837324	-	107	5	80	0.046729	0.0884521	2.36064e-05	9.9915	2.08902e-05	29.03	b4325	-	NA	NA	NA	N	N	N
EC958_0788	nagE	837501	839429	+	1928	158	3018	0.0819502	0.354082	7.68286e-09	22.2246	4.69361e-85	99.07	b0679	fused N-acetyl glucosamine specific PTS enzyme: IIC, IIB , and IIA components	COG1263	G	Phosphotransferase system IIC components, glucose/maltose/N-acetylglucosamine-specific	N	N	N
EC958_0789	0789	839536	840798	-	1262	102	1381	0.0808241	0.344417	9.93179e-09	21.8532	6.33254e-56	20.5	b0621	-	COG0471	P	Di- and tricarboxylate transporters	N	N	N
EC958_0790	0790	840830	841282	-	452	42	956	0.0929204	0.447546	6.29926e-10	25.7985	1.69841e-20	35.33	b4252	-	COG2731	G	Beta-galactosidase, beta subunit	N	N	N
EC958_0791	0791	841297	842448	-	1151	153	3265	0.132928	0.731319	6.88426e-14	38.3525	4.53513e-51	28.42	b0414	-	COG4692	G	Predicted neuraminidase (sialidase)	N	N	N
EC958_0792	ygdQ	842502	843242	-	740	111	694	0.15	0.813471	1.40419e-15	43.5565	4.29788e-33	62.45	b2832	inner membrane protein, UPF0053 family	COG0861	P	Membrane protein TerC, possibly involved in tellurium resistance	N	N	N
EC958_0793	0793	843320	844189	-	869	125	2558	0.143843	0.786528	5.71511e-15	41.6878	9.79363e-39	30.18	b0268	-	COG0329	EM	Dihydrodipicolinate synthase/N-acetylneuraminate lyase	N	N	N
EC958_0794	0794	844211	845350	-	1139	88	1565	0.0772608	0.313928	2.23799e-08	20.6719	1.51864e-50	29.47	b2799	-	COG1454	C	Alcohol dehydrogenase, class IV	N	N	N
EC958_0795	0795	845538	846755	+	1217	94	2134	0.0772391	0.313744	2.24906e-08	20.6647	5.88607e-54	23.9	b2737	-	COG3395	S	Uncharacterized protein conserved in bacteria	N	N	N
EC958_0796	0796	846766	847734	+	968	111	2275	0.114669	0.616744	4.42343e-12	32.6982	4.57929e-43	37.35	b0052	-	COG1995	H	Pyridoxal phosphate biosynthesis protein	N	N	N
EC958_0797	0797	847784	848497	+	713	40	474	0.056101	0.146725	2.78638e-06	13.4062	6.51934e-32	34.43	b2735	-	COG1349	KG	Transcriptional regulators of sugar metabolism	N	N	N
EC958_0798	glnS	848735	850381	+	1646	5	177	0.00303767	2.61279e-06	0.500287	-14.939	1.01359e-72	99.64	b0680	glutamyl-tRNA synthetase	COG0008	J	Glutamyl- and glutaminyl-tRNA synthetases	Y	Y	Y
EC958_0799	chiP	850841	852229	+	1388	143	2274	0.103026	0.529855	6.29019e-11	29.0308	1.95202e-61	99.15	b0681	chitoporin, uptake of chitosugars	NA	NA	NA	N	N	N
EC958_0800	chiQ	852297	852605	+	308	18	289	0.0584416	0.163215	1.63411e-06	14.2361	3.37626e-14	96.3	b0682	novel lipoprotein induced by chitosugars	NA	NA	NA	N	N	N
EC958_0801	fur	852707	853135	-	428	5	47	0.0116822	0.000665389	0.069704	-6.14433	1.90447e-19	100	b0683	DNA-binding transcriptional dual regulator of siderophore biosynthesis and transport	COG0735	P	Fe2+/Zn2+ uptake regulation proteins	Y	N	N
EC958_0802	fldA	853442	853954	-	512	0	0	0	0	1	-173.929	4.03377e-23	100	b0684	flavodoxin 1	COG0716	C	Flavodoxins	Y	Y	Y
EC958_0803	ybfE	854112	854456	-	344	25	505	0.0726744	0.275159	6.36774e-08	19.1362	8.99161e-16	100	b0685	LexA-regulated conserved protein	NA	NA	NA	N	N	N
EC958_0804	ybfF	854545	855291	-	746	78	1321	0.104558	0.541828	4.43607e-11	29.5165	2.34867e-33	99.21	b0686	acyl-CoA esterase in vitro	COG0596	R	Predicted hydrolases or acyltransferases (alpha/beta hydrolase superfamily)	N	N	N
EC958_0805	seqA	855494	856021	+	527	47	761	0.0891841	0.415996	1.47655e-09	24.5896	8.90489e-24	99.45	b0687	regulatory protein for replication initiation	COG3057	L	Negative regulator of replication initiationR	N	N	N
EC958_0806	pgm	856065	857687	+	1622	104	619	0.0641184	0.205797	4.47899e-07	16.2182	1.13656e-71	99.82	b0688	phosphoglucomutase	COG0033	G	Phosphoglucomutase	N	N	N
EC958_0807	potE	857762	859063	-	1301	120	2239	0.0922367	0.441808	7.36172e-10	25.5779	1.2467e-57	100	b0692	putrescine/proton symporter: putrescine/ornithine antiporter	COG0531	E	Amino acid transporters	N	N	N
EC958_0808	speF	859078	861267	-	2189	207	3253	0.0945637	0.461267	4.33079e-10	26.3277	1.80164e-96	96.58	b0693	ornithine decarboxylase isozyme, inducible	COG1982	E	Arginine/lysine/ornithine decarboxylases	N	N	N
EC958_0809	0809	861669	861785	-	116	6	94	0.0517241	0.117858	7.55827e-06	11.8313	8.43906e-06	50	b2294	-	NA	NA	NA	N	N	N
EC958_0810	kdpE	861965	862624	-	659	31	314	0.047041	0.0901697	2.19855e-05	10.1079	1.50003e-29	99.11	b0694	DNA-binding response regulator in two-component regulatory system with KdpD	COG0745	TK	Response regulators consisting of a CheY-like receiver domain and a winged-helix DNA-binding domain	N	N	N
EC958_0811	kdpD	862639	865305	-	2666	188	3065	0.0705176	0.257232	1.04122e-07	18.4076	2.4674e-117	99.55	b0695	fused sensory histidine kinase in two-component regulatory system with KdpE: signal sensing protein	COG2205	T	Osmosensitive K+ channel histidine kinase	N	N	N
EC958_0812	kdpC	865316	865870	-	554	55	844	0.099278	0.499952	1.47835e-10	27.8379	5.87057e-25	96.32	b0696	potassium translocating ATPase, subunit C	COG2156	P	K+-transporting ATPase, c chain	N	N	N
EC958_0813	kdpB	865897	867927	-	2030	170	2853	0.0837438	0.36948	5.10413e-09	22.8143	1.62235e-89	99.27	b0697	potassium translocating ATPase, subunit B	COG2216	P	High-affinity K+ transport system, ATPase chain B	N	N	N
EC958_0814	kdpA	867968	869623	-	1655	134	2785	0.0809668	0.345641	9.61391e-09	21.9004	4.0946e-73	98.74	b0698	potassium translocating ATPase, subunit A	COG2060	P	K+-transporting ATPase, A chain	N	N	N
EC958_0815	ybfA	870043	870231	+	188	23	412	0.12234	0.668272	7.69481e-13	35.0866	5.98545e-09	97.06	b0699	predicted protein	NA	NA	NA	N	N	N
EC958_0816	ybgA	870350	870841	+	491	40	649	0.0814664	0.349929	8.57884e-09	22.0652	3.3437e-22	93.49	b0707	conserved protein, DUF1722 family	COG3272	S	Uncharacterized conserved protein	N	N	N
EC958_0817	phr	870856	872256	+	1400	125	1709	0.0892857	0.41686	1.44272e-09	24.6226	5.82931e-62	95.33	b0708	deoxyribodipyrimidine photolyase, FAD-binding	COG0415	L	Deoxyribodipyrimidine photolyase	N	N	N
EC958_0818	dtpD	872316	873779	-	1463	158	3345	0.107997	0.568145	2.02496e-11	30.6034	1.02346e-64	99.19	b0709	dipeptide and tripeptide permease D	COG3104	E	Dipeptide/tripeptide permease	N	N	N
EC958_0819	ybgI	874068	874793	+	725	65	1366	0.0896552	0.419997	1.32617e-09	24.7425	1.94687e-32	99.6	b0710	conserved metal-binding protein, NIF3 family	COG0327	S	Uncharacterized conserved protein	N	N	N
EC958_0820	ybgJ	874834	875472	+	638	51	730	0.0799373	0.336813	1.21572e-08	21.5602	1.24342e-28	98.17	b0711	predicted enzyme subunit	COG2049	E	Allophanate hydrolase subunit 1	N	N	N
EC958_0821	ybgK	875484	876398	+	914	84	1648	0.0919037	0.439006	7.94244e-10	25.4703	1.05365e-40	98.71	b0712	predicted enzyme subunit	COG1984	E	Allophanate hydrolase subunit 2	N	N	N
EC958_0822	ybgL	876406	877122	+	716	45	1006	0.0628492	0.195991	5.98211e-07	15.7785	4.81933e-32	94.26	b0713	conserved protein, UPF0271 family	COG1540	R	Uncharacterized proteins, homologs of lactam utilization protein B	N	N	N
EC958_0823	nei	877176	877949	+	773	49	559	0.0633894	0.200147	5.28886e-07	15.9659	1.54836e-34	97.34	b0714	endonuclease VIII/ 5-formyluracil/5-hydroxymethyluracil DNA glycosylase	COG0266	L	Formamidopyrimidine-DNA glycosylase	N	N	N
EC958_0824	abrB	877964	878992	-	1028	85	1365	0.0826848	0.360389	6.49805e-09	22.4664	1.0876e-45	98.28	b0715	regulator of aidB expression; inner membrane protein	COG3180	R	Putative ammonia monooxygenase	N	N	N
EC958_0825	0825	879190	879885	-	695	39	586	0.0561151	0.146822	2.77742e-06	13.4112	3.99487e-31	28.44	b3226	-	COG2186	K	Transcriptional regulators	N	N	N
EC958_0826	0826	880167	880835	+	668	61	1520	0.0913174	0.434065	9.07848e-10	25.2808	6.05971e-30	24.41	b3929	-	COG0684	H	Demethylmenaquinone methyltransferase	N	N	N
EC958_0827	0827	880866	881861	+	995	105	1941	0.105528	0.549331	3.55592e-11	29.8235	3.0189e-44	34.5	b4358	-	COG1063	ER	Threonine dehydrogenase and related Zn-dependent dehydrogenases	N	N	N
EC958_0828	0828	881891	882628	+	737	55	1057	0.0746269	0.291573	4.07999e-08	19.7921	5.81395e-33	37.75	b4266	-	COG1028	IQR	Dehydrogenases with different specificities (related to short-chain alcohol dehydrogenases)	N	N	N
EC958_0829	0829	882661	882954	+	293	25	360	0.0853242	0.383035	3.55989e-09	23.332	1.52939e-13	43.75	b3091	-	NA	NA	NA	N	N	N
EC958_0830	0830	882972	884150	+	1178	225	3472	0.191002	0.929903	1.22336e-19	55.8222	2.98979e-52	29.67	b3128	-	COG2721	G	Altronate dehydratase	N	N	N
EC958_0831	0831	884196	885146	+	950	233	3597	0.245263	0.98368	5.18486e-25	71.7205	2.80606e-42	28.62	b3579	-	COG1638	G	TRAP-type C4-dicarboxylate transport system, periplasmic component	N	N	N
EC958_0832	0832	885224	885667	+	443	85	1297	0.191874	0.931437	1.00282e-19	56.0802	4.20428e-20	29.93	b3577	-	COG3090	G	TRAP-type C4-dicarboxylate transport system, small permease component	N	N	N
EC958_0833	0833	885685	886977	+	1292	403	10448	0.31192	0.997702	1.30201e-31	90.9306	3.08612e-57	34.52	b3578	-	COG1593	G	TRAP-type C4-dicarboxylate transport system, large permease component	N	N	N
EC958_0834	gltA	887042	888307	-	1265	85	875	0.0671937	0.230139	2.22163e-07	17.2757	4.68124e-56	99.3	b0720	citrate synthase	COG0372	C	Citrate synthase	N	N	N
EC958_0835	0835	888313	888480	+	167	15	108	0.0898204	0.421399	1.27715e-09	24.7961	4.9615e-08	36.17	b0052	-	NA	NA	NA	N	N	N
EC958_0836	sdhC	889019	889405	+	386	16	99	0.0414508	0.0619552	7.86433e-05	7.98737	1.3086e-17	99.22	b0721	succinate dehydrogenase, membrane subunit, binds cytochrome b556	COG2009	C	Succinate dehydrogenase/fumarate reductase, cytochrome b subunit	N	N	N
EC958_0837	sdhD	889417	889746	+	329	21	146	0.0638298	0.203555	4.78361e-07	16.1184	4.07305e-15	100	b0722	succinate dehydrogenase, membrane subunit, binds cytochrome b556	COG2142	C	Succinate dehydrogenase, hydrophobic anchor subunit	N	N	N
EC958_0838	sdhA	889764	891512	+	1748	103	741	0.0589245	0.166701	1.46374e-06	14.4064	3.50348e-77	100	b0723	succinate dehydrogenase, flavoprotein subunit	COG1053	C	Succinate dehydrogenase/fumarate reductase, flavoprotein subunit	N	N	N
EC958_0839	sdhB	891546	892244	+	698	49	299	0.0702006	0.254618	1.11928e-07	18.3001	2.95316e-31	99.58	b0724	succinate dehydrogenase, FeS subunit	COG0479	C	Succinate dehydrogenase/fumarate reductase, Fe-S protein subunit	N	N	N
EC958_0840	sucA	892624	895407	+	2783	69	288	0.0247934	0.0113101	0.00350775	1.0126	1.88276e-122	99.89	b0726	2-oxoglutarate decarboxylase, thiamin-requiring	COG0567	C	2-oxoglutarate dehydrogenase complex, dehydrogenase (E1) component, and related enzymes	N	N	N
EC958_0841	sucB	895440	896639	+	1199	24	94	0.0200167	0.0052201	0.0104233	-1.30672	3.60682e-53	99.75	b0727	dihydrolipoyltranssuccinase	COG0508	C	Pyruvate/2-oxoglutarate dehydrogenase complex, dihydrolipoamide acyltransferase (E2) component, and related enzymes	N	N	N
EC958_0842	sucC	896751	897899	+	1148	58	331	0.0505226	0.110423	9.9401e-06	11.3932	6.13488e-51	100	b0728	succinyl-CoA synthetase, beta subunit	COG0045	C	Succinyl-CoA synthetase, beta subunit	N	N	N
EC958_0843	sucD	897917	898768	+	851	48	224	0.0564042	0.148822	2.60024e-06	13.5142	6.00127e-38	100	b0729	succinyl-CoA synthetase, NAD(P)-binding, alpha subunit	COG0074	C	Succinyl-CoA synthetase, alpha subunit	N	N	N
EC958_0844	mngR	898890	899594	-	704	94	1539	0.133523	0.734581	6.01115e-14	38.5351	1.61381e-31	96.25	b0730	DNA-binding transcriptional dual regulator, fatty-acyl-binding	COG2188	K	Transcriptional regulators	N	N	N
EC958_0845	mngA	899778	901679	+	1901	146	2554	0.0768017	0.310018	2.48493e-08	20.519	7.1196e-84	97.5	b0731	fused 2-O-a-mannosyl-D-glycerate specific PTS enzymes: IIA component/IIB component/IIC component	COG1299	G	Phosphotransferase system, fructose-specific IIC component	N	N	N
EC958_0846	mngB	901715	904330	+	2615	551	13557	0.210707	0.957961	1.36881e-21	61.6312	4.19682e-115	91.32	b0732	alpha-mannosidase	COG0383	G	Alpha-mannosidase	N	N	N
EC958_0847	0847	904546	905721	+	1175	237	2636	0.201702	0.946745	1.06666e-20	58.9823	4.04443e-52	23.35	b2225	-	COG4676	S	Uncharacterized protein conserved in bacteria	N	N	N
EC958_0848	0848	905974	906111	+	137	1	1	0.00729927	0.000100472	0.189342	-9.58471	1.01807e-06	32	b4074	-	NA	NA	NA	Y	N	N
EC958_0849	0849	906897	907013	+	116	5	46	0.0431034	0.0697217	5.39534e-05	8.6224	8.43906e-06	37.5	b1214	-	NA	NA	NA	N	N	N
EC958_0850	cydA	907282	908832	+	1550	33	245	0.0212903	0.00654401	0.00779637	-0.666155	1.60247e-68	100	b0733	cytochrome d terminal oxidase, subunit I	COG1271	C	Cytochrome bd-type quinol oxidase, subunit 1	N	Y	Y
EC958_0851	cydB	908866	909987	+	1121	23	223	0.0205174	0.0057164	0.00929877	-1.05271	9.30583e-50	100	b0734	cytochrome d terminal oxidase, subunit II	COG1294	C	Cytochrome bd-type quinol oxidase, subunit 2	N	N	N
EC958_0852	ybgE	910133	910408	+	275	19	369	0.0690909	0.245516	1.4415e-07	17.9231	9.37168e-13	98.97	b0735	conserved protein	COG3790	S	Predicted membrane protein	N	N	N
EC958_0854	0854	910466	910669	-	203	12	102	0.0591133	0.168071	1.40207e-06	14.4728	1.32134e-09	33.33	b2756	-	NA	NA	NA	N	N	N
EC958_0855	ybgC	910582	910968	+	386	11	143	0.0284974	0.0183669	0.00150753	2.6831	1.3086e-17	99.25	b0736	acyl-CoA thioesterase, involved in phospholipid metabolism	COG0824	R	Predicted thioesterase	N	N	N
EC958_0856	tolQ	910983	911657	+	674	25	257	0.037092	0.0438627	0.00021245	6.27424	3.31145e-30	99.13	b0737	membrane spanning protein in TolA-TolQ-TolR complex	COG0811	U	Biopolymer transport proteins	N	N	N
EC958_0857	tolR	911679	912089	+	410	22	160	0.0536585	0.130282	4.86277e-06	12.5313	1.16701e-18	100	b0738	membrane spanning protein in TolA-TolQ-TolR complex	COG0848	U	Biopolymer transport protein	N	N	N
EC958_0858	tolA	912172	913464	+	1292	56	723	0.0433437	0.0708913	5.1078e-05	8.71409	3.08612e-57	96.1	b0739	membrane anchored protein in TolA-TolQ-TolR complex	COG3064	M	Membrane protein involved in colicin uptake	N	N	N
EC958_0859	tolB	913615	914889	+	1274	87	1045	0.0682889	0.238985	1.73074e-07	17.6499	1.89109e-56	100	b0740	periplasmic protein	COG0823	U	Periplasmic component of the Tol biopolymer transport system	N	N	N
EC958_0860	pal	914942	915445	+	503	29	374	0.0576541	0.15759	1.9555e-06	13.9578	9.9853e-23	99.42	b0741	peptidoglycan-associated outer membrane lipoprotein	COG2885	M	Outer membrane protein and related peptidoglycan-associated (lipo)proteins	N	N	N
EC958_0861	ybgF	915473	916246	+	773	52	855	0.0672704	0.230756	2.18312e-07	17.302	1.54836e-34	98.48	b0742	periplasmic TolA-binding protein	COG1729	S	Uncharacterized protein conserved in bacteria	N	N	N
EC958_0862	nadA	917162	918187	+	1025	45	728	0.0439024	0.0736519	4.49681e-05	8.92684	1.47124e-45	98.27	b0750	quinolinate synthase, subunit A	COG0379	H	Quinolinate synthase	N	N	N
EC958_0863	pnuC	918243	918944	+	701	53	859	0.0756063	0.299861	3.26348e-08	20.12	2.18308e-31	99.16	b0751	nicotinamide mononucleotide transporter	COG3201	H	Nicotinamide mononucleotide transporter	N	N	N
EC958_0864	zitB	918959	919882	-	923	65	993	0.0704225	0.256448	1.06405e-07	18.3753	4.25644e-41	99.04	b0752	zinc efflux system	COG1230	P	Co/Zn/Cd efflux system component	N	N	N
EC958_0865	ybgS	920014	920376	-	362	32	642	0.0883978	0.409305	1.76645e-09	24.3342	1.46736e-16	99.21	b0753	conserved protein	NA	NA	NA	N	N	N
EC958_0866	aroG	920710	921744	+	1034	54	841	0.0522244	0.121018	6.74358e-06	12.0129	5.94339e-46	99.71	b0754	3-deoxy-D-arabino-heptulosonate-7-phosphate synthase, phenylalanine repressible	COG0722	E	3-deoxy-D-arabino-heptulosonate 7-phosphate (DAHP) synthase	N	N	N
EC958_0867	gpmA	921929	922663	-	734	47	637	0.0640327	0.205131	4.56734e-07	16.1885	7.8648e-33	100	b0755	phosphoglyceromutase 1	COG0588	G	Phosphoglycerate mutase 1	N	N	N
EC958_0868	galM	922884	923906	-	1022	60	870	0.0587084	0.165138	1.53766e-06	14.3302	1.99022e-45	98.84	b0756	galactose-1-epimerase (mutarotase)	COG2017	G	Galactose mutarotase and related enzymes	N	N	N
EC958_0869	galK	923918	925048	-	1130	79	1620	0.0699115	0.25224	1.19553e-07	18.202	3.75929e-50	100	b0757	galactokinase	COG0153	G	Galactokinase	N	N	N
EC958_0870	galT	925070	926098	-	1028	56	809	0.0544747	0.135685	4.03709e-06	12.8247	1.0876e-45	99.43	b0758	galactose-1-phosphate uridylyltransferase	COG1085	C	Galactose-1-phosphate uridylyltransferase	N	N	N
EC958_0871	galE	926126	927124	-	998	69	1157	0.0691383	0.245903	1.42601e-07	17.9392	2.23168e-44	99.41	b0759	UDP-galactose-4-epimerase	COG1087	M	UDP-glucose 4-epimerase	N	N	N
EC958_0872	modF	927405	928859	-	1454	113	2087	0.0777166	0.317817	2.01706e-08	20.8236	2.53349e-64	97.55	b0760	fused molybdate transporter subunits of ABC superfamily: ATP-binding components	COG1119	P	ABC-type molybdenum transport system, ATPase component/photorepair protein PhrA	N	N	N
EC958_0873	modE	928945	929715	-	770	59	1094	0.0766234	0.3085	2.58804e-08	20.4595	2.09454e-34	100	b0761	DNA-binding transcriptional repressor for the molybdenum transport operon modABC	COG2005	R	N-terminal domain of molybdenum-binding protein	N	N	N
EC958_0874	ybhT	929862	929993	+	131	14	188	0.10687	0.559611	2.61826e-11	30.2478	1.86299e-06	100	b0762	predicted protein	NA	NA	NA	N	N	N
EC958_0875	modA	930178	930933	+	755	53	797	0.0701987	0.254602	1.11976e-07	18.2994	9.48794e-34	98.05	b0763	molybdate transporter subunit	COG0725	P	ABC-type molybdate transport system, periplasmic component	N	N	N
EC958_0876	modB	930951	931622	+	671	50	667	0.0745156	0.290634	4.18477e-08	19.7549	4.47956e-30	98.69	b0764	molybdate transporter subunit	COG4149	P	ABC-type molybdate transport system, permease component	N	N	N
EC958_0877	modC	931643	932683	+	1040	53	719	0.0509615	0.113114	8.99359e-06	11.5535	3.24789e-46	98.86	b0765	molybdate transporter subunit	COG4148	P	ABC-type molybdate transport system, ATPase component	N	N	N
EC958_0878	ybhA	932702	933502	-	800	66	1042	0.0825	0.358802	6.77772e-09	22.4056	1.02076e-35	99.26	b0766	pyridoxal phosphate (PLP) phosphatase	COG0561	R	Predicted hydrolases of the HAD superfamily	N	N	N
EC958_0879	pgl	933675	934652	+	977	67	800	0.0685773	0.241329	1.62059e-07	17.7482	1.8499e-43	100	b0767	6-phosphogluconolactonase	COG2706	G	3-carboxymuconate cyclase	N	N	N
EC958_0880	ybhD	934711	935646	-	935	105	1321	0.112299	0.599869	7.59321e-12	31.9561	1.2711e-41	99.37	b0768	predicted DNA-binding transcriptional regulator	COG0583	K	Transcriptional regulator	N	N	N
EC958_0881	ybhH	935848	936882	+	1034	130	1174	0.125725	0.689457	3.55659e-13	36.1344	5.94339e-46	100	b0769	conserved protein	COG2828	S	Uncharacterized protein conserved in bacteria	N	N	N
EC958_0882	ybhI	936976	938391	+	1415	329	6971	0.232509	0.976704	9.49804e-24	68.0093	1.28687e-62	99.37	b0770	predicted transporter	COG0471	P	Di- and tricarboxylate transporters	N	N	N
EC958_0883	ybhJ	938592	940835	+	2243	221	4385	0.0985288	0.493879	1.75373e-10	27.5986	7.83017e-99	99.2	b0771	predicted hydratase	COG1048	C	Aconitase A	N	N	N
EC958_0884	ybhC	940994	942259	-	1265	131	2821	0.103557	0.534026	5.57248e-11	29.1994	4.68124e-56	99.06	b0772	acyl-CoA thioesterase, lipoprotein	COG4677	G	Pectin methylesterase	N	N	N
EC958_0885	ybhB	942429	942887	-	458	50	905	0.10917	0.57693	1.54976e-11	30.9729	9.2813e-21	98.73	b0773	kinase inhibitor homolog, UPF0098 family	COG1881	R	Phospholipid-binding protein	N	N	N
EC958_0886	bioA	942964	944235	-	1271	89	1753	0.0700236	0.253161	1.16536e-07	18.24	2.55816e-56	97.9	b0774	7,8-diaminopelargonic acid synthase, PLP-dependent	COG0161	H	Adenosylmethionine-8-amino-7-oxononanoate aminotransferase	N	N	N
EC958_0887	bioB	944340	945362	+	1022	73	1115	0.0714286	0.264775	8.45951e-08	18.7158	1.99022e-45	100	b0775	biotin synthase	COG0502	H	Biotin synthase and related enzymes	N	N	N
EC958_0888	bioF	945377	946513	+	1136	90	1643	0.0792254	0.330714	1.42998e-08	21.3244	2.05434e-50	97.4	b0776	8-amino-7-oxononanoate synthase	COG0156	H	7-keto-8-aminopelargonate synthetase and related enzymes	N	N	N
EC958_0889	bioC	946518	947255	+	737	80	1644	0.108548	0.572283	1.78594e-11	30.777	5.81395e-33	98.01	b0777	predicted methltransferase, enzyme of biotin synthesis	COG2226	H	Methylase involved in ubiquinone/menaquinone biosynthesis	N	N	N
EC958_0890	bioD	947266	947925	+	659	54	593	0.0819423	0.354014	7.69665e-09	22.222	1.50003e-29	96.89	b0778	dethiobiotin synthetase	COG0132	H	Dethiobiotin synthetase	N	N	N
EC958_0891	uvrB	948522	950525	+	2003	145	2146	0.0723914	0.272794	6.79215e-08	19.0408	2.4609e-88	100	b0779	excinulease of nucleotide excision repair, DNA damage recognition component	COG0556	L	Helicase subunit of the DNA excision repair complex	N	N	N
EC958_0892	ybhK	950581	951471	-	890	61	914	0.0685393	0.24102	1.63467e-07	17.7353	1.18148e-39	98.68	b0780	predicted transferase with NAD(P)-binding Rossmann-fold domain	COG0391	S	Uncharacterized conserved protein	N	N	N
EC958_0893	moaA	951886	952857	+	971	54	729	0.0556128	0.143373	3.11445e-06	13.2321	3.38518e-43	99.09	b0781	molybdopterin biosynthesis protein A	COG2896	H	Molybdenum cofactor biosynthesis enzyme	N	N	N
EC958_0894	moaB	952897	953391	+	494	30	574	0.0607287	0.179961	9.70089e-07	15.0397	2.47178e-22	100	b0782	molybdopterin biosynthesis protein B	COG0521	H	Molybdopterin biosynthesis enzymes	N	N	N
EC958_0895	moaC	953412	953879	+	467	26	278	0.0556745	0.143795	3.07091e-06	13.2541	3.74938e-21	100	b0783	molybdopterin biosynthesis, protein C	COG0315	H	Molybdenum cofactor biosynthesis enzyme	N	N	N
EC958_0896	moaD	953890	954117	+	227	15	124	0.0660793	0.22123	2.86428e-07	16.8937	1.17837e-10	96.3	b0784	molybdopterin synthase, small subunit	COG1977	H	Molybdopterin converting factor, small subunit	N	N	N
EC958_0897	moaE	954137	954571	+	434	27	435	0.062212	0.191126	6.91745e-07	15.5571	1.04074e-19	99.33	b0785	molybdopterin synthase, large subunit	COG0314	H	Molybdopterin converting factor, large subunit	N	N	N
EC958_0898	ybhL	954726	955412	+	686	89	1726	0.129738	0.713317	1.42479e-13	37.3718	9.889e-31	100	b0786	inner membrane protein, UPF0005 family	COG0670	R	Integral membrane protein, interacts with FtsH	N	N	N
EC958_0899	ybhM	955636	956331	+	695	64	600	0.0920863	0.440543	7.61855e-10	25.5293	3.99487e-31	93.25	b0787	inner membrane protein, UPF0005 family	COG0670	R	Integral membrane protein, interacts with FtsH	N	N	N
EC958_0900	ybhN	956385	957323	-	938	89	1077	0.0948827	0.463918	4.02699e-10	26.4302	9.39644e-42	99.37	b0788	conserved inner membrane protein	COG0392	S	Predicted integral membrane protein	N	N	N
EC958_0901	ybhO	957341	958564	-	1223	53	731	0.0433361	0.0708542	5.11666e-05	8.7112	3.21657e-54	99.27	b0789	cardiolipin synthase 2	COG1502	I	Phosphatidylserine/phosphatidylglycerophosphate/cardiolipin synthases and related enzymes	N	N	N
EC958_0902	ybhP	958579	959322	-	743	43	613	0.0578735	0.15915	1.86008e-06	14.0354	3.17715e-33	99.21	b0790	conserved protein, endo/exonuclease/phosphatase family PFAM PF03372	COG3568	R	Metal-dependent hydrolase	N	N	N
EC958_0903	ybhQ	959473	959865	+	392	22	365	0.0561224	0.146873	2.77277e-06	13.4138	7.1511e-18	100	b0791	inner membrane protein	NA	NA	NA	N	N	N
EC958_0904	ybhR	959845	960933	-	1088	65	1033	0.0597426	0.172668	1.21465e-06	14.6941	2.58307e-48	100	b0792	predicted transporter subunit: membrane component of ABC superfamily	COG0842	V	ABC-type multidrug transport system, permease component	N	N	N
EC958_0905	ybhS	960962	962077	-	1115	94	1342	0.0843049	0.374295	4.49122e-09	22.9983	1.7029e-49	99.47	b0793	predicted transporter subunit: membrane component of ABC superfamily	COG0842	V	ABC-type multidrug transport system, permease component	N	N	N
EC958_0906	ybhF	962088	963806	-	1718	138	2116	0.080326	0.340145	1.11263e-08	21.6887	7.18893e-76	99.65	b0794	fused predicted transporter subunits of ABC superfamily: ATP-binding components	COG1131	V	ABC-type multidrug transport system, ATPase component	N	N	N
EC958_0907	ybhG	963817	964794	-	977	85	1587	0.087001	0.397387	2.42888e-09	23.8795	1.8499e-43	99.7	b0795	predicted membrane fusion protein (MFP) component of efflux pump, membrane anchor	COG1566	V	Multidrug resistance efflux pump	N	N	N
EC958_0908	ybiH	964815	965468	-	653	50	639	0.0765697	0.308043	2.61992e-08	20.4416	2.74495e-29	99.55	b0796	predicted DNA-binding transcriptional regulator	COG1309	K	Transcriptional regulator	N	N	N
EC958_0909	rhlE	965715	967058	+	1343	102	1857	0.0759494	0.302772	3.01793e-08	20.2346	1.81439e-59	98.68	b0797	ATP-dependent RNA helicase	COG0513	LKJ	Superfamily II DNA and RNA helicases	N	N	N
EC958_0910	0910	967153	967275	-	122	9	61	0.0737705	0.284355	4.95969e-08	19.5049	4.6117e-06	35.71	b0518	-	NA	NA	NA	N	N	N
EC958_0911	ybiA	967309	967485	-	176	9	152	0.0511364	0.114193	8.64216e-06	11.6173	2.0043e-08	87.5	b0798	conserved protein, DUF1768 family	COG3236	S	Uncharacterized protein conserved in bacteria	N	N	N
EC958_0912	dinG	967613	969745	+	2132	135	2047	0.0633208	0.199618	5.37219e-07	15.9421	5.60767e-94	99.72	b0799	ATP-dependent DNA helicase	COG1199	KL	Rad3-related DNA helicases	N	N	N
EC958_0913	ybiB	969791	970735	+	944	71	1047	0.0752119	0.29652	3.57054e-08	19.988	5.13488e-42	99.69	b0800	predicted transferase/phosphorylase	COG0547	E	Anthranilate phosphoribosyltransferase	N	N	N
EC958_0914	ybiC	970893	971960	+	1067	58	768	0.054358	0.134907	4.14595e-06	12.7828	2.14118e-47	99.17	b0801	predicted dehydrogenase	COG2055	C	Malate/L-lactate dehydrogenases	N	N	N
EC958_0915	ybiJ	972116	972358	-	242	13	95	0.053719	0.130679	4.79619e-06	12.553	2.60135e-11	100	b0802	predicted protein	NA	NA	NA	N	N	N
EC958_0916	ybiI	972641	972889	-	248	28	363	0.112903	0.604209	6.61672e-12	32.1453	1.42156e-11	98.86	b0803	DksA-type zinc finger protein, function unknown	COG1734	T	DnaK suppressor protein	N	N	N
EC958_0917	ybiX	972981	973640	-	659	46	809	0.0698027	0.251346	1.22555e-07	18.1651	1.50003e-29	98.22	b0804	conserved protein, Fe(II)-dependent oxygenase superfamily	COG3128	S	Uncharacterized iron-regulated protein	N	N	N
EC958_0918	fiu	973700	975964	-	2264	148	2629	0.065371	0.215618	3.36625e-07	16.6502	9.44616e-100	98.95	b0805	catecholate siderophore receptor Fiu	COG4774	P	Outer membrane receptor for monomeric catechols	N	N	N
EC958_0919	mcbA	976247	976489	-	242	23	476	0.0950413	0.465234	3.88399e-10	26.4812	2.60135e-11	98.84	b0806	colanic acid mucoidy stimulation protein	NA	NA	NA	N	N	N
EC958_0920	rlmF	976693	977820	+	1127	74	794	0.065661	0.217911	3.15086e-07	16.75	5.08536e-50	87.18	b0807	23S rRNA mA1618 methyltransferase, SAM-dependent	COG3129	R	Predicted SAM-dependent methyltransferase	N	N	N
EC958_0921	ybiO	977835	980042	-	2207	165	2831	0.0747621	0.292716	3.95609e-08	19.8375	2.94015e-97	99.19	b0808	predicted mechanosensitive channel	COG0668	M	Small-conductance mechanosensitive channel	N	N	N
EC958_0922	glnQ	980177	980881	-	704	38	533	0.0539773	0.132381	4.52193e-06	12.646	1.61381e-31	99.17	b0809	glutamine transporter subunit	COG1126	E	ABC-type polar amino acid transport system, ATPase component	N	N	N
EC958_0923	glnP	980896	981537	-	641	48	502	0.074883	0.293738	3.84856e-08	19.878	9.1918e-29	100	b0810	glutamine transporter subunit	COG0765	E	ABC-type amino acid transport system, permease component	N	N	N
EC958_0924	glnH	981694	982422	-	728	36	431	0.0494505	0.103978	1.26925e-05	11	1.4392e-32	100	b0811	glutamine transporter subunit	COG0834	ET	ABC-type amino acid transport/signal transduction systems, periplasmic component/domain	N	N	N
EC958_0925	dps	982844	983329	-	485	42	941	0.0865979	0.393941	2.66267e-09	23.748	6.11872e-22	100	b0812	Fe-binding and storage protein	COG0783	P	DNA-binding ferritin-like protein (oxidative damage protectant)	N	N	N
EC958_0926	rhtA	983647	984516	-	869	88	1662	0.101266	0.515915	9.39605e-11	28.4714	9.79363e-39	100	b0813	threonine and homoserine efflux system	COG5006	R	Predicted permease, DMT superfamily	N	N	N
EC958_0927	ompX	984887	985384	+	497	60	1290	0.120724	0.657818	1.11229e-12	34.5851	1.82723e-22	100	b0814	outer membrane protein X	COG3637	M	Opacity protein and related surface antigens	N	N	N
EC958_0928	ybiP	985451	987016	-	1565	156	2743	0.0996805	0.503203	1.34871e-10	27.9663	3.53759e-69	99.43	b0815	predicted hydrolase, inner membrane	COG2194	R	Predicted membrane-associated, metal-dependent hydrolase	N	N	N
EC958_0929	0929	987306	987416	-	110	8	96	0.0727273	0.275602	6.29146e-08	19.154	1.54428e-05	34.29	b3149	-	NA	NA	NA	N	N	N
EC958_0930	mntR	987620	988069	+	449	31	517	0.0690423	0.245119	1.45756e-07	17.9066	2.29752e-20	100	b0817	DNA-binding transcriptional regulator of mntH	COG1321	K	Mn-dependent transcriptional regulator	N	N	N
EC958_0931	ybiR	988084	989184	+	1100	91	1525	0.0827273	0.360753	6.43546e-09	22.4804	7.71384e-49	97.84	b0818	predicted transporter	COG0471	P	Di- and tricarboxylate transporters	N	N	N
EC958_0932	ybiS	989260	990156	-	896	101	1683	0.112723	0.602918	6.89393e-12	32.0889	6.45647e-40	100	b0819	L,D-transpeptidase linking Lpp to murein	COG1376	S	Uncharacterized protein conserved in bacteria	N	N	N
EC958_0933	ybiT	990399	991973	+	1574	121	1947	0.0768742	0.310635	2.44418e-08	20.5431	1.42909e-69	99.81	b0820	fused predicted transporter subunits of ABC superfamily: ATP-binding components	COG0488	R	ATPase components of ABC transporters with duplicated ATPase domains	N	N	N
EC958_0934	ybiV	992191	992988	-	797	60	817	0.0752823	0.297116	3.51365e-08	20.0116	1.38083e-35	97.41	b0822	sugar phosphatase; preference for fructose-1-P, ribose-5-P and glucose-6-P	COG0561	R	Predicted hydrolases of the HAD superfamily	N	N	N
EC958_0935	ybiW	993152	995566	-	2414	195	2967	0.0807788	0.344028	1.00349e-08	21.8383	2.59674e-106	99.38	b0823	predicted pyruvate formate lyase	COG1882	C	Pyruvate-formate lyase	N	N	N
EC958_0936	ybiY	995590	996471	-	881	78	1271	0.0885358	0.41048	1.71175e-09	24.379	2.92468e-39	97.66	b0824	predicted pyruvate formate lyase activating enzyme	COG1180	O	Pyruvate-formate lyase-activating enzyme	N	N	N
EC958_0937	fsaA	996620	997264	+	644	62	1176	0.0962733	0.47542	2.93286e-10	26.8766	6.79491e-29	98.64	b0825	fructose-6-phosphate aldolase 1	COG0176	G	Transaldolase	N	N	N
EC958_0938	moeB	997358	998089	-	731	54	728	0.0738714	0.285204	4.84688e-08	19.5387	1.06391e-32	98.39	b0826	molybdopterin synthase sulfurylase	COG0476	H	Dinucleotide-utilizing enzymes involved in molybdopterin and thiamine biosynthesis family 2	N	N	N
EC958_0939	moeA	998107	999324	-	1217	89	1183	0.0731306	0.278981	5.73866e-08	19.2898	5.88607e-54	99.03	b0827	molybdopterin biosynthesis protein	COG0303	H	Molybdopterin biosynthesis enzyme	N	N	N
EC958_0940	iaaA	999546	1000493	+	947	68	1142	0.0718057	0.26791	7.76252e-08	18.8432	3.79589e-42	98.13	b0828	Isoaspartyl peptidase	COG1446	E	Asparaginase	N	N	N
EC958_0941	gsiA	1000498	1002351	+	1853	132	1841	0.0712358	0.263175	8.83954e-08	18.6507	8.95201e-82	98.39	b0829	glutathione transporter ATP-binding protein, ABC superfamily	COG1123	R	ATPase components of various ABC-type transport systems, contain duplicated ATPase	N	N	N
EC958_0942	gsiB	1002389	1003909	+	1520	122	2241	0.0802632	0.339606	1.12868e-08	21.6679	3.28818e-67	99.02	b0830	glutathione periplasmic binding protein, ABC superfamily transporter	COG0747	E	ABC-type dipeptide transport system, periplasmic component	N	N	N
EC958_0943	gsiC	1003945	1004847	+	902	62	1100	0.0687361	0.242622	1.56294e-07	17.8023	3.52827e-40	99.67	b0831	glutathione transporter, permease component, ABC superfamily	COG0601	EP	ABC-type dipeptide/oligopeptide/nickel transport systems, permease components	N	N	N
EC958_0944	gsiD	1004868	1005761	+	893	99	1702	0.110862	0.589424	1.05374e-11	31.505	8.73397e-40	99.67	b0832	glutathione transporter, permease component, ABC superfamily	COG1173	EP	ABC-type dipeptide/oligopeptide/nickel transport systems, permease components	N	N	N
EC958_0945	yliE	1005956	1008286	+	2330	253	3030	0.108584	0.572549	1.77154e-11	30.7882	1.226e-102	98.98	b0833	predicted cyclic-di-GMP phosphodiesterase, inner membrane protein	COG2200	T	FOG: EAL domain	N	N	N
EC958_0946	yliF	1008312	1009622	+	1310	218	3407	0.166412	0.871949	3.32916e-17	48.5003	5.03632e-58	98.64	b0834	predicted diguanylate cyclase	COG2199	T	FOG: GGDEF domain	N	N	N
EC958_0947	rimO	1009687	1010994	-	1307	103	1500	0.0788064	0.327129	1.5733e-08	21.1855	6.81286e-58	100	b0835	ribosomal protein S12 methylthiotransferase; radical SAM superfamily	COG0621	J	2-methylthioadenine synthetase	N	N	N
EC958_0948	bssR	1011225	1011590	+	365	29	471	0.0794521	0.332655	1.35795e-08	21.3995	1.08473e-16	100	b0836	repressor of biofilm formation by indole transport regulation	NA	NA	NA	N	N	N
EC958_0949	yliI	1011719	1012816	+	1097	77	1199	0.0701914	0.254543	1.12161e-07	18.297	1.04349e-48	99.19	b0837	soluble aldose sugar dehydrogenase	COG2133	G	Glucose/sorbosone dehydrogenases	N	N	N
EC958_0950	yliJ	1012831	1013439	-	608	46	589	0.0756579	0.300299	3.2253e-08	20.1372	2.55142e-27	99.52	b0838	glutathione S-transferase homolog	COG0625	O	Glutathione S-transferase	N	N	N
EC958_0951	dacC	1013695	1014888	+	1193	88	1374	0.0737636	0.284297	4.96747e-08	19.5025	6.60021e-53	99.75	b0839	D-alanyl-D-alanine carboxypeptidase (penicillin-binding protein 6a)	COG1686	M	D-alanyl-D-alanine carboxypeptidase	N	N	N
EC958_0952	deoR	1014953	1015693	-	740	41	389	0.0554054	0.141959	3.26523e-06	13.158	4.29788e-33	99.6	b0840	DNA-binding transcriptional repressor	COG1349	KG	Transcriptional regulators of sugar metabolism	N	N	N
EC958_0953	ybjG	1015769	1016347	-	578	40	482	0.0692042	0.246441	1.40476e-07	17.9616	5.23537e-26	98.99	b0841	undecaprenyl pyrophosphate phosphatase	NA	NA	NA	N	N	N
EC958_0954	mdfA	1016620	1017867	+	1247	106	1245	0.085004	0.38029	3.82952e-09	23.2272	2.86854e-55	99.76	b0842	multidrug efflux system protein	COG2814	G	Arabinose efflux permease	N	N	N
EC958_0955	ybjH	1017926	1018186	-	260	31	426	0.119231	0.647965	1.56353e-12	34.1208	4.24522e-12	100	b0843	predicted protein	NA	NA	NA	N	N	N
EC958_0956	ybjI	1018296	1019093	-	797	84	1035	0.105395	0.548311	3.66491e-11	29.7816	1.38083e-35	98.89	b0844	FMN and erythrose-4-P phosphatase	COG0561	R	Predicted hydrolases of the HAD superfamily	N	N	N
EC958_0957	ybjJ	1019111	1020301	-	1190	80	984	0.0672269	0.230406	2.20487e-07	17.2871	8.92842e-53	99.25	b0845	predicted transporter	COG0738	G	Fucose permease	N	N	N
EC958_0958	ybjK	1020403	1020921	+	518	37	532	0.0714286	0.264775	8.45951e-08	18.7158	2.20434e-23	98.88	b0846	predicted DNA-binding transcriptional regulator	COG3226	S	Uncharacterized protein conserved in bacteria	N	N	N
EC958_0959	ybjL	1021115	1022782	-	1667	166	3009	0.0995801	0.502393	1.37995e-10	27.9343	1.22277e-73	99.82	b0847	predicted transporter	COG2985	R	Predicted permease	N	N	N
EC958_0960	ybjM	1023069	1023428	+	359	39	687	0.108635	0.572934	1.7509e-11	30.8044	1.98497e-16	98.4	b0848	inner membrane protein	NA	NA	NA	N	N	N
EC958_0961	grxA	1023476	1023715	-	239	28	571	0.117155	0.633964	2.50994e-12	33.4742	3.51897e-11	98.82	b0849	glutaredoxin 1, redox coenzyme for ribonucleotide reductase (RNR1a)	COG0695	O	Glutaredoxin and related proteins	N	N	N
EC958_0962	ybjC	1023893	1024162	+	269	26	505	0.0966543	0.478555	2.68886e-10	26.9988	1.71495e-12	97.89	b0850	conserved protein, DUF1418 family	NA	NA	NA	N	N	N
EC958_0963	nfsA	1024164	1024868	+	704	85	1393	0.120739	0.657912	1.10867e-12	34.5895	1.61381e-31	98.75	b0851	nitroreductase A, NADPH-dependent, FMN-dependent	COG0778	C	Nitroreductase	N	N	N
EC958_0964	rimK	1024947	1025831	+	884	62	1450	0.0701357	0.254084	1.13594e-07	18.2781	2.16203e-39	99.67	b0852	ribosomal protein S6 modification protein	COG0189	HJ	Glutathione synthase/Ribosomal protein S6 modification enzyme (glutaminyl transferase)	N	N	N
EC958_0965	ybjN	1025937	1026395	+	458	28	384	0.0611354	0.182999	8.84196e-07	15.1818	9.2813e-21	100	b0853	predicted oxidoreductase	NA	NA	NA	N	N	N
EC958_0966	potF	1026763	1027857	+	1094	79	1372	0.0722121	0.271297	7.07564e-08	18.9804	1.41157e-48	99.19	b0854	putrescine transporter subunit: periplasmic-binding component of ABC superfamily	COG0687	E	Spermidine/putrescine-binding periplasmic protein	N	N	N
EC958_0967	potG	1027970	1029085	+	1115	78	1367	0.0699552	0.252598	1.18369e-07	18.2168	1.7029e-49	99.47	b0855	putrescine transporter subunit: ATP-binding component of ABC superfamily	COG3842	E	ABC-type spermidine/putrescine transport systems, ATPase components	N	N	N
EC958_0968	potH	1029113	1030039	+	926	76	1367	0.0820734	0.35514	7.47001e-09	22.2652	3.14651e-41	96.85	b0856	putrescine transporter subunit: membrane component of ABC superfamily	COG1176	E	ABC-type spermidine/putrescine transport system, permease component I	N	N	N
EC958_0969	potI	1030054	1030881	+	827	49	907	0.0592503	0.169068	1.35895e-06	14.5211	6.72938e-37	99.64	b0857	putrescine transporter subunit: membrane component of ABC superfamily	COG1177	E	ABC-type spermidine/putrescine transport system, permease component II	N	N	N
EC958_0970	ybjO	1030959	1031429	+	470	38	1024	0.0808511	0.344648	9.8709e-09	21.8622	2.77168e-21	100	b0858	inner membrane protein, DUF2593 family	NA	NA	NA	N	N	N
EC958_0971	rumB	1031488	1032597	+	1109	93	1717	0.0838593	0.370471	4.97149e-09	22.8522	3.11617e-49	98.4	b0859	23S rRNA m(5)U747 methyltransferase	COG2265	J	SAM-dependent methyltransferases related to tRNA (uracil-5-)-methyltransferase	N	N	N
EC958_0972	artJ	1032644	1033357	-	713	39	653	0.0546985	0.137183	3.83631e-06	12.9049	6.51934e-32	99.59	b0860	arginine transporter subunit	COG0834	ET	ABC-type amino acid transport/signal transduction systems, periplasmic component/domain	N	N	N
EC958_0973	artM	1033601	1034251	-	650	77	1241	0.118462	0.642818	1.86326e-12	33.8814	3.71322e-29	100	b0861	arginine transporter subunit	COG4160	E	ABC-type arginine/histidine transport system, permease component	N	N	N
EC958_0974	artQ	1034269	1034967	-	698	60	940	0.0859599	0.38848	3.07961e-09	23.5397	2.95316e-31	100	b0862	arginine transporter subunit	COG4215	E	ABC-type arginine transport system, permease component	N	N	N
EC958_0975	artI	1034992	1035705	-	713	60	1169	0.0841515	0.372978	4.65114e-09	22.948	6.51934e-32	99.18	b0863	arginine transporter subunit	COG0834	ET	ABC-type amino acid transport/signal transduction systems, periplasmic component/domain	N	N	N
EC958_0976	artP	1035741	1036451	-	710	45	786	0.0633803	0.200076	5.29986e-07	15.9627	8.81902e-32	100	b0864	arginine transporter subunit	COG4161	E	ABC-type arginine transport system, ATPase component	N	N	N
EC958_0977	ybjP	1036687	1037184	-	497	72	1115	0.144869	0.79122	4.52336e-15	41.9997	1.82723e-22	94.74	b0865	lipoprotein	NA	NA	NA	N	N	N
EC958_0978	ybjQ	1037328	1037633	+	305	20	280	0.0655738	0.21722	3.21419e-07	16.72	4.56722e-14	100	b0866	conserved protein, UPF0145 family	COG0393	S	Uncharacterized conserved protein	N	N	N
EC958_0979	amiD	1037648	1038460	+	812	66	796	0.0812808	0.348336	8.94966e-09	22.004	3.0483e-36	98.91	b0867	1,6-anhydro-N-acetylmuramyl-L-alanine amidase, Zn-dependent; OM lipoprotein	COG3023	V	Negative regulator of beta-lactamase expression	N	N	N
EC958_0980	ybjS	1038475	1039506	-	1031	81	1234	0.0785645	0.32506	1.66252e-08	21.1053	8.03991e-46	99.7	b0868	predicted NAD(P)H-binding oxidoreductase with NAD(P)-binding Rossmann-fold domain	COG0451	MG	Nucleoside-diphosphate-sugar epimerases	N	N	N
EC958_0981	ybjT	1039587	1040999	-	1412	111	1623	0.0786119	0.325465	1.64465e-08	21.121	1.74081e-62	96.85	b0869	conserved protein with NAD(P)-binding Rossmann-fold domain	COG0702	MG	Predicted nucleoside-diphosphate-sugar epimerases	N	N	N
EC958_0982	ltaE	1041028	1042011	-	983	82	1480	0.0834181	0.366684	5.49763e-09	22.7073	1.01092e-43	99.7	b0870	L-allo-threonine aldolase, PLP-dependent	COG2008	E	Threonine aldolase	N	N	N
EC958_0983	poxB	1042066	1043766	-	1700	147	2487	0.0864706	0.392851	2.74112e-09	23.7065	4.40518e-75	98.78	b0871	pyruvate dehydrogenase (pyruvate oxidase), thiamin-dependent, FAD-binding	COG0028	EH	Thiamine pyrophosphate-requiring enzymes [acetolactate synthase, pyruvate dehydrogenase (cytochrome), glyoxylate carboligase, phosphonopyruvate decarboxylase]	N	N	N
EC958_0984	hcr	1043917	1044867	-	950	71	1477	0.0747368	0.292502	3.97896e-08	19.829	2.80606e-42	98.45	b0872	HCP oxidoreductase, NADH-dependent	COG1018	C	Flavodoxin reductases (ferredoxin-NADPH reductases) family 1	N	N	N
EC958_0985	hcp	1044897	1046531	-	1634	135	2365	0.0826193	0.359826	6.59579e-09	22.4449	3.39412e-72	99.27	b0873	hybrid-cluster [4Fe-2S-2O] protein in anaerobic terminal reductases	COG1151	C	6Fe-6S prismane cluster-containing protein	N	N	N
EC958_0986	ybjE	1046693	1047574	-	881	123	2399	0.139614	0.766292	1.49903e-14	40.399	2.92468e-39	98.33	b0874	predicted transporter	COG2431	S	Predicted membrane protein	N	N	N
EC958_0987	aqpZ	1048007	1048684	-	677	76	1264	0.11226	0.599584	7.66189e-12	31.9437	2.44795e-30	99.57	b0875	aquaporin Z	COG0580	G	Glycerol uptake facilitator and related permeases (Major Intrinsic Protein Family)	N	N	N
EC958_0988	0988	1048915	1049091	-	176	15	241	0.0852273	0.382204	3.63946e-09	23.3003	2.0043e-08	28	b0069	-	NA	NA	NA	N	N	N
EC958_0989	ybjD	1049127	1050767	+	1640	125	1822	0.0762195	0.305066	2.83766e-08	20.3248	1.85479e-72	99.64	b0876	conserved protein with nucleoside triphosphate hydrolase domain	COG3593	L	Predicted ATP-dependent endonuclease of the OLD family	N	N	N
EC958_0990	ybjX	1050782	1051756	-	974	68	1181	0.0698152	0.251448	1.22207e-07	18.1693	2.50245e-43	99.09	b0877	conserved protein	COG2990	S	Uncharacterized protein conserved in bacteria	N	N	N
EC958_0991	macA	1051889	1052986	+	1097	75	1018	0.0683683	0.23963	1.69968e-07	17.677	1.04349e-48	98.65	b0878	macrolide transporter subunit, membrane fusion protein (MFP) component	COG0845	M	Membrane-fusion protein	N	N	N
EC958_0992	macB	1053001	1054929	+	1928	135	2319	0.0700207	0.253138	1.16612e-07	18.2391	4.69361e-85	99.54	b0879	fused macrolide transporter subunits of ABC superfamily: ATP-binding component/membrane component	COG1136	V	ABC-type antimicrobial peptide transport system, ATPase component	N	N	N
EC958_0993	cspD	1055020	1055226	-	206	13	185	0.0631068	0.197969	5.64084e-07	15.8679	9.76783e-10	100	b0880	inhibitor of DNA replication, cold shock protein homolog	COG1278	K	Cold shock proteins	N	N	N
EC958_0994	clpS	1055567	1055869	+	302	21	408	0.0695364	0.249161	1.30227e-07	18.0746	6.1783e-14	100	b0881	regulatory protein for ClpA substrate specificity	COG2127	S	Uncharacterized conserved protein	N	N	N
EC958_0995	clpA	1055918	1058176	+	2258	155	2575	0.0686448	0.241878	1.59582e-07	17.7712	1.72858e-99	100	b0882	ATPase and specificity subunit of ClpA-ClpP ATP-dependent serine protease, chaperone activity	COG0542	O	ATPases with chaperone activity, ATP-binding subunit	N	N	N
EC958_0996	infA	1058879	1059079	-	200	0	0	0	0	1	-173.929	1.78744e-09	100	b0884	translation initiation factor IF-1	COG0361	J	Translation initiation factor 1 (IF-1)	Y	Y	Y
EC958_0997	aat	1059382	1060068	-	686	53	832	0.0772595	0.313917	2.23865e-08	20.6715	9.889e-31	98.72	b0885	leucyl/phenylalanyl-tRNA-protein transferase	COG2360	O	Leu/Phe-tRNA-protein transferase	N	N	N
EC958_0998	cydC	1060128	1061831	-	1703	51	540	0.0299472	0.021746	0.00108322	3.31357	3.25647e-75	98.95	b0886	fused glutathione, cysteine exporter subunits of ABC superfamily: membrane component/ATP-binding component	COG4987	CO	ABC-type transport system involved in cytochrome bd biosynthesis, fused ATPase and permease components	N	Y	Y
EC958_0999	cydD	1061850	1063598	-	1748	56	498	0.0320366	0.0272597	0.000672706	4.20274	3.50348e-77	99.32	b0887	fused glutathione, cysteine exporter subunits of ABC superfamily: membrane component/ATP-binding component	COG4988	CO	ABC-type transport system involved in cytochrome bd biosynthesis, ATPase and permease components	N	N	N
EC958_1000	trxB	1063739	1064686	-	947	59	326	0.062302	0.191811	6.77691e-07	15.5884	3.79589e-42	99.07	b0888	thioredoxin reductase, FAD/NAD(P)-binding	COG0492	O	Thioredoxin reductase	N	N	N
EC958_1001	lrp	1065248	1065724	+	476	53	912	0.111345	0.592946	9.44016e-12	31.6564	1.51464e-21	100	b0889	DNA-binding transcriptional dual regulator, leucine-binding	COG1522	K	Transcriptional regulators	N	N	N
EC958_1002	ftsK	1065877	1069965	+	4088	221	1475	0.0540607	0.132933	4.43676e-06	12.676	1.56892e-179	96.35	b0890	DNA translocase at septal ring sorting daughter chromsomes	COG1674	D	DNA segregation ATPase FtsK/SpoIIIE and related proteins	N	Y	Y
EC958_1003	lolA	1070142	1070735	+	593	0	0	0	0	1	-173.929	1.15575e-26	100	b0891	chaperone for lipoproteins	COG2834	M	Outer membrane lipoprotein-sorting protein	Y	Y	Y
EC958_1004	rarA	1070764	1072089	+	1325	73	967	0.0550943	0.139849	3.50521e-06	13.0467	1.11181e-58	99.55	b0892	recombination protein involved in processing recombnation intermediates at replication forks	COG2256	L	ATPase related to the helicase subunit of the Holliday junction resolvase	N	N	N
EC958_1005	serS	1072198	1073472	+	1274	2	2	0.00156986	1.58217e-07	0.699129	-18.4989	1.89109e-56	100	b0893	seryl-tRNA synthetase, also charges selenocysteinyl-tRNA with serine	COG0172	J	Seryl-tRNA synthetase	Y	Y	Y
EC958_1006	1006	1074128	1074370	-	242	19	257	0.0785124	0.324614	1.68238e-08	21.088	2.60135e-11	37.84	b2082	-	NA	NA	NA	N	N	N
EC958_1007	1007	1074429	1075520	-	1091	73	1206	0.0669111	0.227871	2.36948e-07	17.179	1.9095e-48	21.66	b4059	-	COG3500	R	Phage protein D	N	N	N
EC958_1008	1008	1075585	1075698	-	113	3	120	0.0265487	0.01438	0.00235085	1.81582	1.14159e-05	28.21	b3648	-	NA	NA	NA	N	N	N
EC958_1009	1009	1075696	1076862	+	1166	94	1500	0.0806175	0.342645	1.04108e-08	21.785	1.00117e-51	40.91	b0456	-	COG3497	R	Phage tail sheath protein FI	N	N	N
EC958_1010	1010	1076880	1077374	+	494	32	482	0.0647773	0.210947	3.85418e-07	16.4457	2.47178e-22	24.44	b1495	-	COG3498	R	Phage tail tube protein FII	N	N	N
EC958_1011	1011	1077448	1077804	+	356	30	425	0.0842697	0.373992	4.52748e-09	22.9867	2.68517e-16	24.44	b1291	-	NA	NA	NA	N	N	N
EC958_1012	1012	1077831	1077968	+	137	5	102	0.0364964	0.0416625	0.000243352	6.03532	1.01807e-06	36.84	b0305	-	NA	NA	NA	N	N	N
EC958_1013	1013	1077973	1080762	+	2789	204	2937	0.0731445	0.279097	5.72057e-08	19.2944	1.02887e-122	23.64	b0924	-	COG5283	S	Phage-related tail protein	N	N	N
EC958_1014	1014	1080793	1081263	+	470	38	841	0.0808511	0.344648	9.8709e-09	21.8622	2.77168e-21	25.4	b0088	-	COG3499	R	Phage protein U	N	N	N
EC958_1015	pinE	1081310	1081570	-	260	18	241	0.0692308	0.246659	1.39626e-07	17.9707	4.24522e-12	67.11	b1158	e14 prophage; site-specific DNA recombinase	COG1961	L	Site-specific recombinases, DNA invertase Pin homologs	N	N	N
EC958_1016	1016	1082110	1082319	+	209	42	426	0.200957	0.945704	1.26419e-20	58.7627	7.22074e-10	46.15	b1546	-	NA	NA	NA	N	N	N
EC958_1017	1017	1082366	1082881	-	515	59	536	0.114563	0.615996	4.53196e-12	32.6649	2.98191e-23	24.82	b2354	-	NA	NA	NA	N	N	N
EC958_1018	1018	1082902	1084365	-	1463	180	3367	0.123035	0.672697	6.56806e-13	35.3018	1.02346e-64	31.79	b1372	-	COG5301	R	Phage-related tail fibre protein	N	N	N
EC958_1019	1019	1084386	1084898	-	512	34	586	0.0664062	0.223834	2.65853e-07	17.0059	4.03377e-23	26.97	b0649	-	COG4385	R	Bacteriophage P2-related tail formation protein	N	N	N
EC958_1020	1020	1084909	1085787	-	878	75	1178	0.0854214	0.383868	3.48188e-09	23.3638	3.95635e-39	34.09	b4532	-	COG3948	R	Phage-related baseplate assembly protein	N	N	N
EC958_1021	1021	1085809	1086141	-	332	36	787	0.108434	0.571425	1.83315e-11	30.741	3.01095e-15	25.81	b3812	-	COG3628	R	Phage baseplate assembly protein W	N	N	N
EC958_1022	1022	1086156	1086704	-	548	33	610	0.060219	0.176178	1.08965e-06	14.8612	1.07427e-24	26	b1588	-	COG4540	R	Phage P2 baseplate assembly protein gpV	N	N	N
EC958_1023	1023	1086734	1087351	-	617	52	807	0.0842788	0.37407	4.51809e-09	22.9897	1.0307e-27	38.78	b2390	-	NA	NA	NA	N	N	N
EC958_1024	1024	1087362	1087727	-	365	32	366	0.0876712	0.403111	2.0847e-09	24.0978	1.08473e-16	26.89	b2755	-	NA	NA	NA	N	N	N
EC958_1025	1025	1087937	1089109	-	1172	119	1842	0.101536	0.518066	8.83505e-11	28.5573	5.47109e-52	57.23	b4309	-	NA	NA	NA	N	N	N
EC958_1026	1026	1089124	1089276	-	152	26	532	0.171053	0.885328	1.15572e-17	49.8892	2.24748e-07	24.14	b3430	-	NA	NA	NA	N	N	N
EC958_1027	1027	1089266	1089643	-	377	34	690	0.0901857	0.424496	1.17509e-09	24.9145	3.23933e-17	25	b0556	-	NA	NA	NA	N	N	N
EC958_1028	1028	1089658	1090032	-	374	29	386	0.0775401	0.31631	2.0999e-08	20.7648	4.382e-17	30.91	b2059	-	NA	NA	NA	N	N	N
EC958_1029	1029	1090047	1090286	-	239	24	391	0.100418	0.509138	1.13987e-10	28.2016	3.51897e-11	25	b1517	-	NA	NA	NA	N	N	N
EC958_1030	1030	1090373	1090555	-	182	18	256	0.0989011	0.496901	1.61099e-10	27.7176	1.09529e-08	41.94	b3459	-	COG5004	R	P2-like prophage tail protein X	N	N	N
EC958_1031	1031	1090573	1091049	-	476	52	959	0.109244	0.577476	1.52405e-11	30.996	1.51464e-21	26.88	b3330	-	NA	NA	NA	N	N	N
EC958_1032	1032	1091169	1091951	-	782	76	2036	0.0971867	0.482926	2.38149e-10	27.1693	6.25494e-35	27.54	b0739	-	NA	NA	NA	N	N	N
EC958_1033	1033	1092015	1093049	-	1034	97	2222	0.0938104	0.454991	5.14228e-10	26.0853	5.94339e-46	21	b2127	-	NA	NA	NA	N	N	N
EC958_1034	1034	1093091	1093909	-	818	86	1635	0.105134	0.546298	3.8894e-11	29.6991	1.66581e-36	23.31	b0534	-	NA	NA	NA	N	N	N
EC958_1035	1035	1094082	1095815	+	1733	118	1871	0.06809	0.237373	1.811e-07	17.5821	1.58702e-76	25	b2390	-	COG5484	S	Uncharacterized conserved protein	N	N	N
EC958_1036	1036	1095833	1096861	+	1028	83	1490	0.0807393	0.34369	1.01257e-08	21.8252	1.0876e-45	42.86	b0555	-	COG5518	R	Bacteriophage capsid portal protein	N	N	N
EC958_1037	1037	1096894	1097400	-	506	45	355	0.0889328	0.413859	1.5636e-09	24.508	7.3815e-23	24.78	b2171	-	NA	NA	NA	N	N	N
EC958_1039	1039	1098679	1099503	+	824	6	28	0.00728155	9.94799e-05	0.190108	-9.60115	9.10315e-37	20.11	b2352	-	NA	NA	NA	Y	N	N
EC958_1040	1040	1099924	1100865	-	941	58	729	0.0616366	0.186767	7.8872e-07	15.3567	6.94619e-42	24.11	b1907	-	NA	NA	NA	N	N	N
EC958_1041	1041	1100960	1103764	-	2804	226	3464	0.0805991	0.342487	1.04544e-08	21.779	2.27132e-123	29.75	b1882	-	NA	NA	NA	N	N	N
EC958_1042	1042	1103789	1104136	-	347	34	638	0.0979827	0.489433	1.98623e-10	27.4241	6.64693e-16	32.47	b2761	-	NA	NA	NA	N	N	N
EC958_1043	1043	1104227	1104439	-	212	17	196	0.0801887	0.338968	1.14801e-08	21.6433	5.33783e-10	42.86	b4257	-	NA	NA	NA	N	N	N
EC958_1044	1044	1104780	1105061	-	281	17	256	0.0604982	0.178247	1.02244e-06	14.959	5.12135e-13	21.78	b1237	-	NA	NA	NA	N	N	N
EC958_1045	1045	1105339	1105524	-	185	27	259	0.145946	0.796058	3.53872e-15	42.3269	8.09681e-09	37.84	b1446	-	NA	NA	NA	N	N	N
EC958_1046	1046	1105566	1105958	-	392	71	1118	0.181122	0.910245	1.16351e-18	52.8913	7.1511e-18	25.33	b3182	-	NA	NA	NA	N	N	N
EC958_1047	1047	1106180	1106404	-	224	19	146	0.0848214	0.378725	3.99229e-09	23.1675	1.59404e-10	27.69	b0438	-	NA	NA	NA	N	N	N
EC958_1048	1048	1106434	1106694	-	260	20	108	0.0769231	0.311051	2.4171e-08	20.5594	4.24522e-12	24	b0162	-	NA	NA	NA	N	N	N
EC958_1049	1049	1106723	1107055	-	332	62	962	0.186747	0.921966	3.22732e-19	54.5616	3.01095e-15	31.75	b1763	-	NA	NA	NA	N	N	N
EC958_1050	1050	1107210	1107383	+	173	19	247	0.109827	0.581801	1.33439e-11	31.1794	2.71131e-08	31.03	b0208	-	NA	NA	NA	N	N	N
EC958_1051	1051	1108872	1109846	+	974	81	1344	0.0831622	0.364487	5.82791e-09	22.6233	2.50245e-43	26.18	b3811	-	COG4974	L	Site-specific recombinase XerD	N	N	N
EC958_1052	dmsA	1110164	1112590	+	2426	143	1849	0.0589448	0.166848	1.45699e-06	14.4135	7.75465e-107	99.75	b0894	dimethyl sulfoxide reductase, anaerobic, subunit A	COG0243	C	Anaerobic dehydrogenases, typically selenocysteine-containing	N	N	N
EC958_1053	dmsB	1112619	1113218	+	599	35	429	0.0584307	0.163137	1.63816e-06	14.2323	6.31585e-27	100	b0895	dimethyl sulfoxide reductase, anaerobic, subunit B	COG0437	C	Fe-S-cluster-containing hydrogenase components 1	N	N	N
EC958_1054	dmsC	1113238	1114083	+	845	70	1273	0.0828402	0.361723	6.27183e-09	22.5175	1.09819e-37	97.56	b0896	dimethyl sulfoxide reductase, anaerobic, subunit C	COG3302	R	DMSO reductase anchor subunit	N	N	N
EC958_1055	ycaC	1114137	1114745	-	608	45	664	0.0740132	0.286397	4.69274e-08	19.5863	2.55142e-27	99.04	b0897	predicted hydrolase, isochorismatase family	COG1335	Q	Amidases related to nicotinamidase	N	N	N
EC958_1056	1056	1114918	1115028	-	110	7	149	0.0636364	0.202056	4.99928e-07	16.0514	1.54428e-05	35.14	b3239	-	NA	NA	NA	N	N	N
EC958_1057	ycaD	1115188	1116207	+	1019	70	1044	0.0686948	0.242285	1.57774e-07	17.7883	2.69226e-45	99.42	b0898	predicted MFS-type transporter	COG2814	G	Arabinose efflux permease	N	N	N
EC958_1058	pflA	1116322	1117044	-	722	35	398	0.0484765	0.0982817	1.58489e-05	10.6408	2.63363e-32	100	b0902	pyruvate formate lyase activating enzyme 1	COG1180	O	Pyruvate-formate lyase-activating enzyme	N	N	N
EC958_1059	pflB	1117254	1119518	-	2264	171	2860	0.07553	0.299215	3.3207e-08	20.0945	9.44616e-100	100	b0903	pyruvate formate lyase I	COG1882	C	Pyruvate-formate lyase	N	N	N
EC958_1060	focA	1119591	1120430	-	839	149	2960	0.177592	0.902114	2.602e-18	51.8407	2.0096e-37	99.3	b0904	formate channel	COG2116	P	Formate/nitrite family of transporters	N	N	N
EC958_1061	ycaO	1120854	1122746	-	1892	250	4129	0.132135	0.726927	8.24777e-14	38.1092	1.7624e-83	93.12	b0905	conserved protein	COG1944	S	Uncharacterized conserved protein	N	N	N
EC958_1062	ycaP	1122861	1123535	+	674	65	1299	0.0964392	0.476786	2.82401e-10	26.9298	3.31145e-30	99.57	b0906	inner membrane protein, UPF0702 family	COG2323	S	Predicted membrane protein	N	N	N
EC958_1063	serC	1123752	1124822	+	1070	61	586	0.0570093	0.153043	2.26515e-06	13.7292	1.58284e-47	98.9	b0907	3-phosphoserine/phosphohydroxythreonine aminotransferase	COG1932	HE	Phosphoserine aminotransferase	N	N	N
EC958_1064	aroA	1124911	1126176	+	1265	172	2777	0.135968	0.747682	3.44188e-14	39.2846	4.68124e-56	98.35	b0908	5-enolpyruvylshikimate-3-phosphate synthetase	COG0128	E	5-enolpyruvylshikimate-3-phosphate synthase	N	N	N
EC958_1065	1065	1126364	1126471	+	107	15	490	0.140187	0.769117	1.31549e-14	40.5738	2.08902e-05	33.33	b1628	-	NA	NA	NA	N	N	N
EC958_1066	pinE	1126450	1126686	-	236	31	708	0.131356	0.722556	9.85162e-14	37.8697	4.76028e-11	67.11	b1158	e14 prophage; site-specific DNA recombinase	COG1961	L	Site-specific recombinases, DNA invertase Pin homologs	N	N	N
EC958_1067	1067	1127686	1127976	+	290	25	428	0.0862069	0.390595	2.91097e-09	23.6204	2.06888e-13	36.21	b3110	-	NA	NA	NA	N	N	N
EC958_1068	1068	1128001	1128597	-	596	80	1388	0.134228	0.738412	5.11806e-14	38.7514	8.54375e-27	58.88	b1156	-	NA	NA	NA	N	N	N
EC958_1069	1069	1128615	1129928	-	1313	158	2590	0.120335	0.655268	1.21551e-12	34.4641	3.72303e-58	30.43	b1547	-	COG5301	R	Phage-related tail fibre protein	N	N	N
EC958_1070	1070	1129949	1130509	-	560	48	922	0.0857143	0.386377	3.25697e-09	23.4595	3.20809e-25	22.81	b1540	-	COG4385	R	Bacteriophage P2-related tail formation protein	N	N	N
EC958_1071	1071	1130520	1131605	-	1085	137	2262	0.126267	0.692759	3.1432e-13	36.3018	3.49424e-48	27.96	b4376	-	COG3948	R	Phage-related baseplate assembly protein	N	N	N
EC958_1072	1072	1131614	1131943	-	329	23	347	0.0699088	0.252217	1.19626e-07	18.2011	4.07305e-15	25	b0631	-	COG3628	R	Phage baseplate assembly protein W	N	N	N
EC958_1073	1073	1132016	1132594	-	578	54	645	0.0934256	0.451776	5.61386e-10	25.9613	5.23537e-26	25.52	b3628	-	COG4540	R	Phage P2 baseplate assembly protein gpV	N	N	N
EC958_1074	1074	1132609	1133745	-	1136	118	1899	0.103873	0.536497	5.18521e-11	29.2996	2.05434e-50	23.83	b2186	-	COG3500	R	Phage protein D	N	N	N
EC958_1075	1075	1133751	1133945	-	194	23	467	0.118557	0.643457	1.82327e-12	33.911	3.27088e-09	27.69	b2523	-	COG5004	R	P2-like prophage tail protein X	N	N	N
EC958_1076	1076	1133963	1134829	-	866	84	1191	0.0969977	0.481376	2.48636e-10	27.1088	1.32483e-38	22.54	b0473	-	COG3499	R	Phage protein U	N	N	N
EC958_1077	1077	1134847	1137780	-	2933	308	4364	0.105012	0.54535	3.99959e-11	29.6603	5.17569e-129	23.2	b3568	-	COG5283	S	Phage-related tail protein	N	N	N
EC958_1078	1078	1137956	1138273	-	317	33	396	0.104101	0.538274	4.92288e-11	29.3718	1.36391e-14	25.33	b3422	-	NA	NA	NA	N	N	N
EC958_1079	1079	1138389	1138604	-	215	20	322	0.0930233	0.448408	6.1532e-10	25.8316	3.94592e-10	31.34	b1732	-	NA	NA	NA	N	N	N
EC958_1080	1080	1138673	1139176	-	503	53	1136	0.105368	0.548099	3.6879e-11	29.7729	9.9853e-23	30.61	b4045	-	COG3498	R	Phage tail tube protein FII	N	N	N
EC958_1081	1081	1139194	1140603	-	1409	147	2803	0.104329	0.540053	4.67312e-11	29.4441	2.35487e-62	28.41	b0285	-	COG3497	R	Phage tail sheath protein FI	N	N	N
EC958_1082	1082	1140611	1140844	-	233	20	369	0.0858369	0.387427	3.16718e-09	23.4996	6.43946e-11	33.33	b3060	-	NA	NA	NA	N	N	N
EC958_1083	1083	1140862	1141308	-	446	43	812	0.0964126	0.476567	2.8412e-10	26.9213	3.10796e-20	28.81	b4385	-	NA	NA	NA	N	N	N
EC958_1084	1084	1141326	1141754	-	428	53	821	0.123832	0.677725	5.47682e-13	35.5487	1.90447e-19	34.69	b2992	-	COG4387	S	Mu-like prophage protein gp36	N	N	N
EC958_1085	1085	1141774	1142094	-	320	36	711	0.1125	0.601313	7.25385e-12	32.0189	1.00825e-14	26.13	b0115	-	NA	NA	NA	N	N	N
EC958_1086	1086	1142122	1143057	-	935	93	1832	0.0994652	0.501465	1.41656e-10	27.8977	1.2711e-41	30.47	b4005	-	NA	NA	NA	N	N	N
EC958_1087	1087	1143090	1144187	-	1097	95	1583	0.0865998	0.393957	2.66153e-09	23.7486	1.04349e-48	25.58	b0739	-	NA	NA	NA	N	N	N
EC958_1088	1088	1144420	1144761	-	341	38	469	0.111437	0.593619	9.24334e-12	31.6855	1.21634e-15	35.09	b3201	-	COG5005	R	Mu-like prophage protein gpG	N	N	N
EC958_1089	1089	1144881	1145684	-	803	99	1625	0.123288	0.674297	6.20018e-13	35.3802	7.54584e-36	29.55	b4477	-	COG2369	S	Uncharacterized protein, homolog of phage Mu protein gp30	N	N	N
EC958_1090	1090	1145683	1147161	-	1478	163	2703	0.110284	0.585179	1.20219e-11	31.3233	2.25937e-65	22.67	b2922	-	COG4383	S	Mu-like prophage protein gp29	N	N	N
EC958_1091	1091	1147179	1148693	-	1514	164	2459	0.108322	0.570589	1.88031e-11	30.7058	6.01712e-67	24.73	b3719	-	COG4373	R	Mu-like prophage FluMu protein gp28	N	N	N
EC958_1092	1092	1148771	1149298	-	527	52	740	0.0986717	0.49504	1.69748e-10	27.6443	8.90489e-24	25.31	b1337	-	NA	NA	NA	N	N	N
EC958_1093	1093	1149316	1149609	-	293	31	555	0.105802	0.551442	3.34027e-11	29.9103	1.52939e-13	38.33	b2194	-	NA	NA	NA	N	N	N
EC958_1094	1094	1149627	1149935	-	308	22	274	0.0714286	0.264775	8.45951e-08	18.7158	3.37626e-14	29.07	b3832	-	NA	NA	NA	N	N	N
EC958_1095	1095	1149950	1150582	-	632	64	1260	0.101266	0.515915	9.39605e-11	28.4714	2.27536e-28	24.14	b0996	-	NA	NA	NA	N	N	N
EC958_1096	1096	1150584	1151186	-	602	65	1235	0.107973	0.567965	2.036e-11	30.5959	4.66891e-27	32.71	b4392	-	COG4623	M	Predicted soluble lytic transglycosylase fused to an ABC-type amino acid-binding protein	N	N	N
EC958_1097	1097	1151327	1151659	-	332	42	1131	0.126506	0.694206	2.97668e-13	36.3755	3.01095e-15	29.11	b0520	-	NA	NA	NA	N	N	N
EC958_1098	1098	1152192	1152518	+	326	30	431	0.0920245	0.440023	7.72664e-10	25.5094	5.50981e-15	25.49	b3888	-	NA	NA	NA	N	N	N
EC958_1099	1099	1152512	1152895	-	383	39	698	0.101828	0.520385	8.26632e-11	28.6501	1.7702e-17	24.44	b0080	-	NA	NA	NA	N	N	N
EC958_1100	1100	1152915	1153115	+	200	27	326	0.135	0.742554	4.29223e-14	38.988	1.78744e-09	42.11	b1033	-	NA	NA	NA	N	N	N
EC958_1101	1101	1153324	1154070	+	746	78	1397	0.104558	0.541828	4.43607e-11	29.5165	2.34867e-33	25.2	b3387	-	COG0338	L	Site-specific DNA methylase	N	N	N
EC958_1102	1102	1154205	1154543	-	338	1	1	0.00295858	2.33734e-06	0.509389	-15.0868	1.6454e-15	28.71	b1570	-	NA	NA	NA	Y	N	N
EC958_1103	1103	1154655	1154825	+	170	10	234	0.0588235	0.16597	1.49782e-06	14.3708	3.66772e-08	26	b3082	-	NA	NA	NA	N	N	N
EC958_1104	1104	1154896	1155186	+	290	17	252	0.0586207	0.164505	1.56872e-06	14.2993	2.06888e-13	26.32	b3423	-	COG1414	K	Transcriptional regulator	N	N	N
EC958_1105	1105	1155215	1156117	+	902	38	606	0.0421286	0.065081	6.73822e-05	8.2487	3.52827e-40	23.38	b1385	-	NA	NA	NA	N	N	N
EC958_1106	1106	1156135	1156434	+	299	13	259	0.0434783	0.0715512	4.95343e-05	8.76542	8.35767e-14	27.94	b4689	-	NA	NA	NA	N	N	N
EC958_1107	1107	1156468	1158219	+	1751	110	1813	0.0628212	0.195777	6.0203e-07	15.7688	2.5899e-77	25.91	b4179	-	NA	NA	NA	N	N	N
EC958_1108	1108	1158248	1159396	+	1148	63	825	0.054878	0.13839	3.6824e-06	12.9693	6.13488e-51	20.15	b1246	-	COG3267	U	Type II secretory pathway, component ExeA (predicted ATPase)	N	N	N
EC958_1109	1109	1159417	1159668	+	251	15	158	0.059761	0.172803	1.20959e-06	14.7005	1.05087e-11	34.78	b3120	-	NA	NA	NA	N	N	N
EC958_1110	1110	1159714	1160226	+	512	67	392	0.130859	0.719745	1.10325e-13	37.717	4.03377e-23	24.39	b0610	-	COG4396	R	Mu-like prophage host-nuclease inhibitor protein Gam	N	N	N
EC958_1111	1111	1160342	1160518	+	176	39	649	0.221591	0.968597	1.14471e-22	64.821	2.0043e-08	34.09	b1088	-	NA	NA	NA	N	N	N
EC958_1112	1112	1160533	1160787	+	254	42	568	0.165354	0.868717	4.23724e-17	48.1831	7.76843e-12	33.33	b0155	-	NA	NA	NA	N	N	N
EC958_1113	1113	1160815	1161093	+	278	31	524	0.111511	0.594157	9.08903e-12	31.7086	6.92789e-13	28.75	b0560	-	NA	NA	NA	N	N	N
EC958_1114	1114	1161126	1161323	+	197	30	575	0.152284	0.822738	8.34149e-16	44.2477	2.41795e-09	31.25	b1659	-	NA	NA	NA	N	N	N
EC958_1115	1115	1161338	1162003	+	665	89	1729	0.133835	0.73628	5.59859e-14	38.6307	8.19725e-30	23.35	b1868	-	NA	NA	NA	N	N	N
EC958_1116	1116	1162018	1162230	+	212	42	659	0.198113	0.941558	2.41764e-20	57.924	5.33783e-10	27.91	b4340	-	NA	NA	NA	N	N	N
EC958_1117	1117	1162446	1162877	+	431	51	614	0.118329	0.64193	1.92022e-12	33.8403	1.40785e-19	39.13	b2321	-	COG4382	S	Mu-like prophage protein gp16	N	N	N
EC958_1118	1118	1162867	1163238	+	371	66	1208	0.177898	0.902842	2.42709e-18	51.9316	5.92773e-17	30.14	b1257	-	COG5566	S	Uncharacterized conserved protein	N	N	N
EC958_1119	ycaL	1163436	1164164	+	728	129	2833	0.177198	0.901166	2.84692e-18	51.7231	1.4392e-32	97.18	b0909	predicted peptidase with chaperone function	COG0501	O	Zn-dependent protease with chaperone function	N	N	N
EC958_1120	cmk	1164355	1165020	+	665	20	56	0.0300752	0.0220618	0.00105206	3.36869	8.19725e-30	100	b0910	cytidylate kinase	COG0283	F	Cytidylate kinase	N	N	N
EC958_1121	rpsA	1165149	1166804	+	1655	11	47	0.00664653	6.84611e-05	0.219725	-10.2103	4.0946e-73	100	b0911	30S ribosomal subunit protein S1	COG0539	J	Ribosomal protein S1	Y	Y	Y
EC958_1122	ihfB	1166982	1167248	+	266	13	85	0.0488722	0.100577	1.44816e-05	10.787	2.31989e-12	100	b0912	integration host factor (IHF), DNA-binding protein, beta subunit	COG0776	L	Bacterial nucleoid DNA-binding protein	N	N	N
EC958_1123	ycaI	1167472	1169718	+	2246	176	2510	0.0783615	0.323324	1.74126e-08	21.0379	5.78834e-99	95.62	b0913	inner membrane protein, ComEC family of competence proteins	COG2333	R	Predicted hydrolase (metallo-beta-lactamase superfamily)	N	N	N
EC958_1124	msbA	1169773	1171503	+	1730	0	0	0	0	1	-173.929	2.14683e-76	99.66	b0914	fused lipid transporter subunits of ABC superfamily: membrane component/ATP-binding component	COG1132	V	ABC-type multidrug transport system, ATPase and permease components	Y	Y	Y
EC958_1125	lpxK	1171518	1172486	+	968	1	1	0.00103306	2.64034e-08	0.79015	-20.649	4.57929e-43	98.17	b0915	lipid A 4'kinase	COG1663	M	Tetraacyldisaccharide-1-P 4'-kinase	Y	Y	Y
EC958_1127	ycaQ	1172544	1173758	+	1214	93	1206	0.0766063	0.308355	2.59816e-08	20.4538	7.96237e-54	97.32	b0916	conserved protein	COG3214	S	Uncharacterized protein conserved in bacteria	N	N	N
EC958_1128	ycaR	1173828	1173992	+	164	5	34	0.0304878	0.0230989	0.0009576	3.54575	6.71165e-08	98.33	b0917	conserved protein, UPF0434 family	COG2835	S	Uncharacterized conserved protein	N	N	N
EC958_1129	kdsB	1174007	1174735	+	728	34	399	0.0467033	0.0883115	2.3745e-05	9.98191	1.4392e-32	98.79	b0918	3-deoxy-manno-octulosonate cytidylyltransferase	COG1212	M	CMP-2-keto-3-deoxyoctulosonic acid synthetase	N	Y	Y
EC958_1130	ycbJ	1174907	1175782	+	875	67	1012	0.0765714	0.308058	2.61887e-08	20.4422	5.35193e-39	99.33	b0919	conserved protein	NA	NA	NA	N	N	N
EC958_1131	ycbC	1175777	1176538	-	761	45	719	0.0591327	0.168212	1.39587e-06	14.4797	5.18488e-34	100	b0920	conserved protein, DUF218 superfamily	COG1434	S	Uncharacterized conserved protein	N	N	N
EC958_1132	smtA	1176692	1177459	+	767	49	756	0.0638853	0.203985	4.72348e-07	16.1376	2.83339e-34	99.23	b0921	predicted S-adenosyl-L-methionine-dependent methyltransferase	COG2227	H	2-polyprenyl-3-methyl-5-hydroxy-6-metoxy-1,4-benzoquinol methylase	N	N	N
EC958_1133	mukF	1177474	1178778	+	1304	1	17	0.000766871	7.35098e-09	0.839589	-22.1485	9.21608e-58	99.77	b0922	chromosome condensin MukBEF, kleisin-like subunit, binds calcium	COG3006	D	Uncharacterized protein involved in chromosome partitioning	Y	Y	Y
EC958_1134	mukE	1178777	1179463	+	686	4	12	0.0058309	3.99266e-05	0.264631	-11.0585	9.889e-31	99.57	b0923	chromosome condensin MukBEF, MukE subunit	COG3095	D	Uncharacterized protein involved in chromosome partitioning	Y	Y	Y
EC958_1135	mukB	1179481	1183923	+	4442	5	21	0.00112562	3.81383e-08	0.77365	-20.2128	5.15289e-195	99.6	b0924	chromosome condensin MukBEF, ATPase and DNA-binding subunit	COG3096	D	Uncharacterized protein involved in chromosome partitioning	Y	Y	Y
EC958_1136	ycbB	1184202	1186031	+	1829	120	1475	0.0656096	0.217504	3.18802e-07	16.7323	1.00381e-80	99.51	b0925	murein L,D-transpeptidase	COG2989	S	Uncharacterized protein conserved in bacteria	N	N	N
EC958_1137	ycbK	1186230	1186760	+	530	24	375	0.045283	0.080708	3.28249e-05	9.44919	6.58282e-24	100	b0926	conserved protein	COG3108	S	Uncharacterized protein conserved in bacteria	N	N	N
EC958_1138	ycbL	1186805	1187434	+	629	37	578	0.0588235	0.16597	1.49782e-06	14.3708	3.07799e-28	97.21	b0927	predicted metal-binding enzyme	COG0491	R	Zn-dependent hydrolases, including glyoxylases	N	N	N
EC958_1139	aspC	1187502	1188674	-	1172	75	703	0.0639932	0.204823	4.60869e-07	16.1749	5.47109e-52	99.49	b0928	aspartate aminotransferase, PLP-dependent	COG1448	E	Aspartate/tyrosine/aromatic aminotransferase	N	N	N
EC958_1140	ompF	1188877	1189947	-	1070	78	1527	0.0728972	0.277024	6.05238e-08	19.2112	1.58284e-47	98.62	b0929	outer membrane porin 1a (Ia;b;F)	COG3203	M	Outer membrane protein (porin)	N	N	N
EC958_1141	asnS	1190568	1191950	-	1382	0	0	0	0	1	-173.929	3.57204e-61	99.79	b0930	asparaginyl tRNA synthetase	COG0017	J	Aspartyl/asparaginyl-tRNA synthetases	Y	Y	Y
EC958_1142	pncB	1192137	1193321	-	1184	89	825	0.0751689	0.296156	3.60568e-08	19.9737	1.63383e-52	99.5	b0931	nicotinate phosphoribosyltransferase	COG1488	H	Nicotinic acid phosphoribosyltransferase	N	N	N
EC958_1143	pepN	1193605	1196199	+	2594	215	3528	0.0828836	0.362095	6.21016e-09	22.5317	3.47886e-114	99.31	b0932	aminopeptidase N	COG0308	E	Aminopeptidase N	N	N	N
EC958_1144	ssuB	1196260	1197009	-	749	64	939	0.0854473	0.38409	3.46142e-09	23.3722	1.73622e-33	99.22	b0933	alkanesulfonate transporter subunit	COG1116	P	ABC-type nitrate/sulfonate/bicarbonate transport system, ATPase component	N	N	N
EC958_1145	ssuC	1197024	1197800	-	776	75	1122	0.0966495	0.478516	2.69179e-10	26.9972	1.14461e-34	98.86	b0934	putative alkanesulfonate transporter subunit	COG0600	P	ABC-type nitrate/sulfonate/bicarbonate transport system, permease component	N	N	N
EC958_1146	ssuD	1197827	1198954	-	1127	86	817	0.0763088	0.305825	2.78048e-08	20.3546	5.08536e-50	97.9	b0935	alkanesulfonate monooxygenase, FMNH(2)-dependent	COG2141	C	Coenzyme F420-dependent N5,N10-methylene tetrahydromethanopterin reductase and related flavin-dependent oxidoreductases	N	N	N
EC958_1147	ssuA	1198969	1199910	-	941	68	963	0.0722635	0.271726	6.99307e-08	18.9977	6.94619e-42	97.49	b0936	putative aliphatic sulfonate binding protein	COG0715	P	ABC-type nitrate/sulfonate/bicarbonate transport systems, periplasmic components	N	N	N
EC958_1148	ssuE	1199921	1200478	-	557	27	294	0.048474	0.0982673	1.58579e-05	10.6399	4.33974e-25	97.91	b0937	NAD(P)H-dependent FMN reductase	COG0431	R	Predicted flavoprotein	N	N	N
EC958_1149	pyrD	1200733	1201725	+	992	116	1120	0.116935	0.632465	2.63864e-12	33.4058	4.08381e-44	99.4	b0945	dihydro-orotate oxidase, FMN-linked	COG0167	F	Dihydroorotate dehydrogenase	N	N	N
EC958_1150	ycbW	1201917	1202441	+	524	65	445	0.124046	0.679066	5.21598e-13	35.6149	1.20461e-23	98.89	b0946	predicted protein	NA	NA	NA	N	N	N
EC958_1151	ycbX	1202456	1203547	-	1091	104	1349	0.0953254	0.467589	3.64041e-10	26.5724	1.9095e-48	97.56	b0947	predicted 2Fe-2S cluster-containing protein; 6-N-hydroxylaminopurine resistance protein	COG3217	R	Uncharacterized Fe-S protein	N	N	N
EC958_1152	rlmL	1203663	1205753	+	2090	153	2269	0.0732057	0.27961	5.64124e-08	19.315	3.85313e-92	99.72	b0948	23S rRNA mG2445 methyltransferase, SAM-dependent	COG0116	L	Predicted N6-adenine-specific DNA methylase	N	N	N
EC958_1153	uup	1205783	1207672	+	1889	116	1131	0.0614082	0.185047	8.30881e-07	15.277	2.38409e-83	99.37	b0949	fused predicted transporter subunits of ABC superfamily: ATP-binding components	COG0488	R	ATPase components of ABC transporters with duplicated ATPase domains	N	N	N
EC958_1154	pqiA	1207820	1209055	+	1235	89	1029	0.0720648	0.270068	7.31728e-08	18.9307	9.60565e-55	100	b0950	paraquat-inducible membrane protein A	COG2995	S	Uncharacterized paraquat-inducible protein A	N	N	N
EC958_1155	pqiB	1209078	1210700	+	1622	98	1227	0.0604192	0.17766	1.04102e-06	14.9313	1.13656e-71	99.63	b0951	paraquat-inducible protein B	COG3008	R	Paraquat-inducible protein B	N	N	N
EC958_1156	ymbA	1210715	1211260	+	545	38	583	0.0697248	0.250706	1.24753e-07	18.1386	1.45321e-24	98.93	b0952	conserved protein	COG3009	S	Uncharacterized protein conserved in bacteria	N	N	N
EC958_1157	rmf	1211534	1211683	+	149	9	107	0.0604027	0.177538	1.04495e-06	14.9255	3.04027e-07	100	b0953	ribosome modulation factor	COG3130	J	Ribosome modulation factor	N	N	N
EC958_1158	fabA	1211771	1212271	-	500	1	1	0.002	4.44176e-07	0.63382	-17.2223	1.35076e-22	99.42	b0954	beta-hydroxydecanoyl thioester dehydrase	COG0764	I	3-hydroxymyristoyl/3-hydroxydecanoyl-(acyl carrier protein) dehydratases	Y	Y	Y
EC958_1159	ycbZ	1212358	1214100	-	1742	100	1078	0.0574053	0.155829	2.06963e-06	13.8697	6.41109e-77	98.98	b0955	predicted peptidase	COG1067	O	Predicted ATP-dependent protease	N	N	N
EC958_1160	ycbG	1214304	1214738	+	434	17	159	0.0391705	0.0520543	0.000132266	7.09854	1.04074e-19	99.33	b0956	conserved protein, UPF0268 family	COG3120	S	Uncharacterized protein conserved in bacteria	N	N	N
EC958_1161	ompA	1214832	1215890	-	1058	83	2511	0.0784499	0.32408	1.70652e-08	21.0672	5.30032e-47	96.29	b0957	outer membrane protein A (3a;II*;G;d)	COG2885	M	Outer membrane protein and related peptidoglycan-associated (lipo)proteins	N	N	N
EC958_1162	1162	1216086	1216238	+	152	7	80	0.0460526	0.0847853	2.75422e-05	9.73843	2.24748e-07	30.19	b3801	-	NA	NA	NA	N	N	N
EC958_1163	sulA	1216240	1216731	-	491	34	335	0.0692464	0.246787	1.39128e-07	17.976	3.3437e-22	99.41	b0958	SOS cell division inhibitor	COG5404	D	SOS-response cell division inhibitor, blocks FtsZ ring formation	N	N	N
EC958_1164	sxy	1216968	1217579	+	611	64	1349	0.104746	0.543292	4.24929e-11	29.5762	1.8861e-27	99.52	b0959	required for expression of CRP-S-dependent promoters	COG3070	K	Regulator of competence-specific genes	N	N	N
EC958_1165	yccS	1217560	1219704	-	2144	189	2554	0.088153	0.407219	1.86785e-09	24.2546	1.67462e-94	99.3	b0960	inner membrane protein	COG1289	S	Predicted membrane protein	N	N	N
EC958_1166	yccF	1219732	1220160	-	428	34	617	0.0794393	0.332546	1.36192e-08	21.3953	1.90447e-19	100	b0961	inner membrane protein, DUF307 family	COG3304	S	Predicted membrane protein	N	N	N
EC958_1167	helD	1220301	1222337	+	2036	145	1717	0.0712181	0.263028	8.8754e-08	18.6447	8.86568e-90	99.42	b0962	DNA helicase IV	COG0210	L	Superfamily I DNA and RNA helicases	N	N	N
EC958_1168	mgsA	1222387	1222827	-	440	44	694	0.1	0.505776	1.25396e-10	28.0682	5.68733e-20	99.34	b0963	methylglyoxal synthase	COG1803	G	Methylglyoxal synthase	N	N	N
EC958_1169	yccT	1222941	1223585	-	644	48	639	0.0745342	0.290791	4.16714e-08	19.7611	6.79491e-29	100	b0964	conserved protein	COG3110	S	Uncharacterized protein conserved in bacteria	N	N	N
EC958_1170	yccU	1223776	1224171	+	395	39	584	0.0987342	0.495547	1.67348e-10	27.6643	5.28635e-18	99.27	b0965	predicted CoA-binding protein with NAD(P)-binding Rossmann-fold domain	COG1832	R	Predicted CoA-binding protein	N	N	N
EC958_1171	hspQ	1224234	1224533	-	299	38	382	0.12709	0.697727	2.60542e-13	36.5559	8.35767e-14	100	b0966	heat shock protein involved in degradation of mutant DnaA; hemimethylated oriC DNA-binding protein	COG3785	S	Uncharacterized conserved protein	N	N	N
EC958_1172	rlmI	1224609	1225781	-	1172	81	1123	0.0691126	0.245693	1.43438e-07	17.9305	5.47109e-52	98.99	b0967	23S rRNA m(5)C1962 methyltransferase, SAM-dependent	COG1092	R	Predicted SAM-dependent methyltransferases	N	N	N
EC958_1173	yccX	1225894	1226154	+	260	20	330	0.0769231	0.311051	2.4171e-08	20.5594	4.24522e-12	98.91	b0968	weak acylphosphatase	COG1254	C	Acylphosphatases	N	N	N
EC958_1174	yccK	1226169	1226480	-	311	4	12	0.0128617	0.000970708	0.0532681	-5.364	2.49585e-14	99.08	b0969	sulfurtransferase required for 2-thiolation step of mnm(5)-s(2)U34-tRNA synthesis	COG2920	P	Dissimilatory sulfite reductase (desulfoviridin), gamma subunit	Y	N	N
EC958_1175	yccA	1226590	1227231	-	641	76	1245	0.118565	0.643511	1.81993e-12	33.9135	9.1918e-29	100	b0970	HflBKC-binding inner membrane protein, UPF0005 family	COG0670	R	Integral membrane protein, interacts with FtsH	N	N	N
EC958_1177	hyaA	1227973	1229073	+	1100	91	1585	0.0827273	0.360753	6.43546e-09	22.4804	7.71384e-49	99.73	b0972	hydrogenase 1, small subunit	COG1740	C	Ni,Fe-hydrogenase I small subunit	N	N	N
EC958_1178	hyaB	1229088	1230863	+	1775	159	2122	0.0895775	0.419337	1.34987e-09	24.7173	2.30967e-78	99.66	b0973	hydrogenase 1, large subunit	COG0374	C	Ni,Fe-hydrogenase I large subunit	N	N	N
EC958_1179	hyaC	1230900	1231589	+	689	78	1410	0.113208	0.606386	6.17319e-12	32.2407	7.31031e-31	99.57	b0974	hydrogenase 1, b-type cytochrome subunit	COG1969	C	Ni,Fe-hydrogenase I cytochrome b subunit	N	N	N
EC958_1180	hyaD	1231604	1232173	+	569	47	859	0.0826011	0.359669	6.62335e-09	22.4388	1.29598e-25	98.46	b0975	protein involved in processing of HyaA and HyaB proteins	COG0680	C	Ni,Fe-hydrogenase maturation factor	N	N	N
EC958_1181	hyaE	1232188	1232568	+	380	36	667	0.0947368	0.462706	4.16319e-10	26.3833	2.39463e-17	98.48	b0976	protein involved in processing of HyaA and HyaB proteins	COG1999	R	Uncharacterized protein SCO1/SenC/PrrC, involved in biogenesis of respiratory and photosynthetic systems	N	N	N
EC958_1182	hyaF	1232583	1233422	+	839	80	1452	0.0953516	0.467806	3.61871e-10	26.5809	2.0096e-37	97.89	b0977	protein involved in nickel incorporation into hydrogenase-1 proteins	NA	NA	NA	N	N	N
EC958_1183	appC	1233574	1235100	+	1526	155	2261	0.101573	0.518359	8.76103e-11	28.5691	1.7969e-67	99.42	b0978	cytochrome bd-II oxidase, subunit I	COG1271	C	Cytochrome bd-type quinol oxidase, subunit 1	N	N	N
EC958_1184	appB	1235130	1236248	+	1118	91	1516	0.0813953	0.349319	8.71893e-09	22.0418	1.25884e-49	100	b0979	cytochrome bd-II oxidase, subunit II	COG1294	C	Cytochrome bd-type quinol oxidase, subunit 2	N	N	N
EC958_1185	appA	1236451	1237743	+	1292	94	897	0.0727554	0.275837	6.25122e-08	19.1635	3.08612e-57	97.92	b0980	phosphoanhydride phosphorylase	NA	NA	NA	N	N	N
EC958_1186	cspH	1237749	1237943	-	194	15	134	0.0773196	0.31443	2.20818e-08	20.6915	3.27088e-09	98.57	b0989	stress protein, member of the CspA-family	COG1278	K	Cold shock proteins	N	N	N
EC958_1187	cspG	1238247	1238441	+	194	9	61	0.0463918	0.0866141	2.5493e-05	9.86545	3.27088e-09	100	b0990	cold shock protein homolog, cold-inducible	COG1278	K	Cold shock proteins	N	N	N
EC958_1188	ymcE	1238600	1238845	+	245	14	169	0.0571429	0.15398	2.19723e-06	13.7766	1.92302e-11	100	b0991	cold shock gene	NA	NA	NA	N	N	N
EC958_1189	gnsA	1238853	1239008	+	155	4	41	0.0258065	0.0130233	0.00278431	1.4789	1.66142e-07	98.25	b4517	Multicopy suppressor of secG(Cs) and fabA6(Ts); predicted regulator of phosphatidylethanolamine synthesis	NA	NA	NA	N	N	N
EC958_1190	yccM	1239075	1240130	-	1055	80	928	0.0758294	0.301754	3.10162e-08	20.1945	7.16999e-47	95.8	b0992	predicted 4Fe-4S membrane protein	COG0348	C	Polyferredoxin	N	N	N
EC958_1191	torS	1240231	1242945	-	2714	168	2051	0.0619013	0.188768	7.42529e-07	15.4489	1.96234e-119	97.03	b0993	hybrid sensory histidine kinase in two-component regulatory system with TorR	COG0642	T	Signal transduction histidine kinase	N	N	N
EC958_1192	torT	1243046	1244056	+	1010	67	797	0.0663366	0.223279	2.70106e-07	16.9821	6.66449e-45	98.83	b0994	periplasmic sensory protein associated with the TorRS two-component regulatory system	COG1879	G	ABC-type sugar transport system, periplasmic component	N	N	N
EC958_1193	torR	1244047	1244721	-	674	38	394	0.0563798	0.148653	2.61475e-06	13.5055	3.31145e-30	99.57	b0995	DNA-binding response regulator in two-component regulatory system with TorS	COG0745	TK	Response regulators consisting of a CheY-like receiver domain and a winged-helix DNA-binding domain	N	N	N
EC958_1194	torC	1244869	1246023	+	1154	82	1323	0.0710572	0.261694	9.207e-08	18.5903	3.35253e-51	99.49	b0996	trimethylamine N-oxide (TMAO) reductase I, cytochrome c-type subunit	COG3005	C	Nitrate/TMAO reductases, membrane-bound tetraheme cytochrome c subunit	N	N	N
EC958_1195	torA	1246041	1248569	+	2528	175	2640	0.0692247	0.246609	1.3982e-07	17.9686	2.6804e-111	99.17	b0997	trimethylamine N-oxide (TMAO) reductase I, catalytic subunit	COG0243	C	Anaerobic dehydrogenases, typically selenocysteine-containing	N	N	N
EC958_1196	torD	1248584	1249165	+	581	35	672	0.060241	0.17634	1.0842e-06	14.8689	3.87018e-26	95.48	b0998	chaperone involved in maturation of TorA subunit of trimethylamine N-oxide reductase system I	COG3381	R	Uncharacterized component of anaerobic dehydrogenases	N	N	N
EC958_1197	cbpM	1249438	1249725	-	287	22	337	0.0766551	0.30877	2.56941e-08	20.4701	2.79867e-13	99.01	b0999	modulator of CbpA co-chaperone	NA	NA	NA	N	N	N
EC958_1198	cbpA	1249743	1250645	-	902	54	607	0.059867	0.173582	1.18071e-06	14.7377	3.52827e-40	99.67	b1000	curved DNA-binding protein, DnaJ homologue that functions as a co-chaperone of DnaK	COG0484	O	DnaJ-class molecular chaperone with C-terminal Zn finger domain	N	N	N
EC958_1199	agp	1251198	1252421	+	1223	108	1609	0.0883074	0.408536	1.80321e-09	24.3048	3.21657e-54	98.31	b1002	glucose-1-phosphatase/inositol phosphatase	NA	NA	NA	N	N	N
EC958_1200	yccJ	1252477	1252686	-	209	10	180	0.0478469	0.094682	1.82952e-05	10.4076	7.22074e-10	100	b1003	predicted protein	NA	NA	NA	N	N	N
EC958_1201	wrbA	1252725	1253303	-	578	44	502	0.0761246	0.30426	2.89975e-08	20.2931	5.23537e-26	100	b1004	NAD(P)H:quinone oxidoreductase	COG0655	R	Multimeric flavodoxin WrbA	N	N	N
EC958_1202	ymdF	1253694	1253849	+	155	13	108	0.083871	0.370571	4.95832e-09	22.856	1.66142e-07	100	b4518	conserved protein	NA	NA	NA	N	N	N
EC958_1203	rutG	1253950	1255260	-	1310	117	1760	0.089313	0.417091	1.43378e-09	24.6315	5.03632e-58	98.87	b1006	predicted transporter	COG2233	F	Xanthine/uracil permeases	N	N	N
EC958_1204	rutF	1255299	1255775	-	476	43	627	0.0903361	0.42577	1.13546e-09	24.9632	1.51464e-21	98.17	b1007	predicted oxidoreductase, flavin:NADH component	COG1853	R	Conserved protein/domain typically associated with flavoprotein oxygenases, DIM6/NTAB family	N	N	N
EC958_1205	rutE	1255804	1256376	-	572	39	426	0.0681818	0.238117	1.77349e-07	17.6134	9.58034e-26	96.43	b1008	predicted oxidoreductase	COG0778	C	Nitroreductase	N	N	N
EC958_1206	rutD	1256404	1257186	-	782	73	997	0.0933504	0.451147	5.71097e-10	25.9371	6.25494e-35	97.37	b1009	predicted hydrolase	COG0596	R	Predicted hydrolases or acyltransferases (alpha/beta hydrolase superfamily)	N	N	N
EC958_1207	rutC	1257212	1257580	-	368	24	363	0.0652174	0.214407	3.48625e-07	16.5973	8.01872e-17	100	b1010	conserved protein	COG0251	J	Putative translation initiation inhibitor, yjgF family	N	N	N
EC958_1208	rutB	1257610	1258287	-	677	48	694	0.070901	0.260401	9.54071e-08	18.5374	2.44795e-30	98.7	b1011	predicted enzyme, isochorismatase homolog	COG1335	Q	Amidases related to nicotinamidase	N	N	N
EC958_1209	rutA	1258302	1259375	-	1073	63	1038	0.0587139	0.165177	1.53574e-06	14.3322	1.17009e-47	99.17	b1012	predicted monooxygenase	COG2141	C	Coenzyme F420-dependent N5,N10-methylene tetrahydromethanopterin reductase and related flavin-dependent oxidoreductases	N	N	N
EC958_1210	rutR	1259681	1260301	+	620	42	658	0.0677419	0.234557	1.96058e-07	17.4632	7.61932e-28	100	b1013	DNA-binding transcriptional repressor for rut operon	COG1309	K	Transcriptional regulator	N	N	N
EC958_1211	putA	1260359	1264303	-	3944	346	5104	0.0877282	0.403597	2.0578e-09	24.1164	3.11886e-173	99.47	b1014	fused DNA-binding transcriptional regulator/proline dehydrogenase/pyrroline-5-carboxylate dehydrogenase	COG4230	C	Delta 1-pyrroline-5-carboxylate dehydrogenase	N	N	N
EC958_1212	1212	1264376	1264567	+	191	14	293	0.0732984	0.280388	5.52328e-08	19.3462	4.42467e-09	23.44	b1324	-	NA	NA	NA	N	N	N
EC958_1213	1213	1264617	1264736	+	119	9	250	0.0756303	0.300065	3.24569e-08	20.128	6.23846e-06	29.73	b2889	-	NA	NA	NA	N	N	N
EC958_1214	putP	1264744	1266234	+	1490	117	1662	0.0785235	0.324709	1.67813e-08	21.0916	6.74716e-66	99.4	b1015	proline:sodium symporter	COG0591	ER	Na+/proline symporter	N	N	N
EC958_1215	1215	1266472	1267284	+	812	49	546	0.0603448	0.177109	1.05883e-06	14.9053	3.0483e-36	28.41	b3964	-	COG0672	P	High-affinity Fe2+/Pb2+ permease	N	N	N
EC958_1216	efeO	1267360	1268469	+	1109	56	668	0.0504959	0.110261	1.00008e-05	11.3834	3.11617e-49	98.67	b1018	inactive ferrous ion transporter EfeUOB	COG2822	P	Predicted periplasmic lipoprotein involved in iron transport	N	N	N
EC958_1217	efeB	1268493	1269746	+	1253	55	651	0.0438947	0.073613	4.5048e-05	8.92388	1.56757e-55	99.05	b1019	deferrrochelatase, periplasmic	COG2837	P	Predicted iron-dependent peroxidase	N	N	N
EC958_1218	phoH	1270115	1271161	+	1046	83	1095	0.0793499	0.33178	1.38994e-08	21.3657	1.77488e-46	98.59	b1020	conserved protein with nucleoside triphosphate hydrolase domain	COG1702	T	Phosphate starvation-inducible protein PhoH, predicted ATPase	N	N	N
EC958_1219	pgaD	1271229	1271624	-	395	60	597	0.151899	0.821201	9.10789e-16	44.1312	5.28635e-18	97.06	b1021	required for biofilm adhesin polysaccharide PGA synthesis	NA	NA	NA	N	N	N
EC958_1220	pgaC	1271644	1272951	-	1307	275	3912	0.210406	0.957623	1.46637e-21	61.5425	6.81286e-58	98.64	b1022	predicted glycosyl transferase	COG1215	M	Glycosyltransferases, probably involved in cell wall biogenesis	N	N	N
EC958_1221	pgaB	1272962	1274962	-	2000	323	3330	0.1615	0.856348	1.0203e-16	47.0259	3.32897e-88	96.43	b1023	biofilm adhesin polysaccharide PGA export lipoprotein with a polysaccharide deacetylase activity needed for export	COG0726	G	Predicted xylanase/chitin deacetylase	N	N	N
EC958_1222	pgaA	1274989	1277394	-	2405	353	3987	0.146778	0.799733	2.92754e-15	42.5794	6.42803e-106	97.03	b1024	biofilm adhesin polysaccharide PGA export, predicted OM protein	NA	NA	NA	N	N	N
EC958_1223	ycdT	1277998	1279347	+	1349	101	729	0.0748703	0.29363	3.85974e-08	19.8737	9.91513e-60	94.37	b1025	diguanylate cyclase	COG3706	T	Response regulator containing a CheY-like receiver domain and a GGDEF domain	N	N	N
EC958_1224	ghrA	1279791	1280711	+	920	60	704	0.0652174	0.214407	3.48625e-07	16.5973	5.75788e-41	98.4	b1033	glyoxylate/hydroxypyruvate reductase A	COG0111	HE	Phosphoglycerate dehydrogenase and related dehydrogenases	N	N	N
EC958_1225	ycdX	1280784	1281503	+	719	85	1166	0.11822	0.64119	1.96886e-12	33.8061	3.56263e-32	99.18	b1034	predicted zinc-binding hydrolase	COG1387	ER	Histidinol phosphatase and related hydrolases of the PHP family	N	N	N
EC958_1226	ycdY	1281545	1282081	+	536	65	681	0.121269	0.661364	9.82474e-13	34.7541	3.59732e-24	100	b1035	conserved protein, REMP family	COG3381	R	Uncharacterized component of anaerobic dehydrogenases	N	N	N
EC958_1227	ycdZ	1282171	1282674	+	503	32	409	0.0636183	0.201916	5.01992e-07	16.0452	9.9853e-23	98.16	b1036	inner membrane protein, DUF1097 family	NA	NA	NA	N	N	N
EC958_1228	csgG	1282757	1283572	-	815	124	1728	0.152147	0.822193	8.6062e-16	44.2063	2.25342e-36	99.64	b1037	Curli production assembly/transport outer membrane lipoprotein	COG1462	M	Uncharacterized protein involved in formation of curli polymers	N	N	N
EC958_1229	csgF	1283617	1283985	-	368	46	332	0.125	0.684999	4.19618e-13	35.9101	8.01872e-17	99.22	b1038	outer membrane protein involved in curlin assembly/transport	NA	NA	NA	N	N	N
EC958_1230	csgE	1284058	1284429	-	371	49	408	0.132075	0.726593	8.36105e-14	38.0908	5.92773e-17	100	b1039	curli production assembly/transport componen	NA	NA	NA	N	N	N
EC958_1231	csgD	1284452	1285084	-	632	48	251	0.0759494	0.302772	3.01793e-08	20.2346	2.27536e-28	99.07	b1040	DNA-binding transcriptional activator for csgBA	COG2197	TK	Response regulator containing a CheY-like receiver domain and an HTH DNA-binding domain	N	N	N
EC958_1232	1232	1285513	1285734	-	221	12	37	0.0542986	0.134512	4.20245e-06	12.7615	2.15633e-10	28.21	b0245	-	NA	NA	NA	N	N	N
EC958_1233	csgB	1285828	1286292	+	464	88	913	0.189655	0.927473	1.66296e-19	55.4235	5.07196e-21	100	b1041	curlin nucleator protein, minor subunit in curli complex	NA	NA	NA	N	N	N
EC958_1234	csgA	1286351	1286791	+	440	101	1294	0.229545	0.974723	1.86664e-23	67.145	5.68733e-20	97.37	b1042	cryptic curlin major subunit	NA	NA	NA	N	N	N
EC958_1235	csgC	1286869	1287183	+	314	70	1458	0.22293	0.969717	8.43547e-23	65.2126	1.84503e-14	98.18	b1043	curli assembly protein	NA	NA	NA	N	N	N
EC958_1236	ymdA	1287322	1287615	+	293	59	1039	0.201365	0.946277	1.15183e-20	58.883	1.52939e-13	96.12	b1044	predicted protein	COG3539	NU	P pilus assembly protein, pilin FimA	N	N	N
EC958_1237	ymdB	1287728	1288243	+	515	43	469	0.0834951	0.367345	5.40191e-09	22.7326	2.98191e-23	100	b1045	RNase III inhibitor during cold shock, UPF0189 family	COG2110	R	Predicted phosphatase homologous to the C-terminal domain of histone macroH2A1	N	N	N
EC958_1238	ymdC	1288263	1289666	+	1403	183	2974	0.130435	0.717325	1.21539e-13	37.5864	4.30924e-62	98.73	b1046	predicted hydrolase	COG1502	I	Phosphatidylserine/phosphatidylglycerophosphate/cardiolipin synthases and related enzymes	N	N	N
EC958_1239	opgC	1289692	1290831	-	1139	196	2337	0.172081	0.888122	9.14217e-18	50.1964	1.51864e-50	99.48	b1047	membrane protein required for succinylation of osmoregulated periplasmic glucans (OPGs)	COG1835	I	Predicted acyltransferases	N	N	N
EC958_1240	1240	1290894	1291019	-	125	17	175	0.136	0.747848	3.41716e-14	39.2943	3.40914e-06	42.11	b2472	-	NA	NA	NA	N	N	N
EC958_1241	1241	1291041	1291154	-	113	15	220	0.132743	0.730302	7.18006e-14	38.2959	1.14159e-05	50	b2010	-	NA	NA	NA	N	N	N
EC958_1242	opgG	1291225	1292760	+	1535	111	766	0.0723127	0.272137	6.91514e-08	19.0143	7.25894e-68	99.8	b1048	osmoregulated periplasmic glucan (OPG) biosynthesis periplasmic protein	COG3131	P	Periplasmic glucans biosynthesis protein	N	N	N
EC958_1243	opgH	1292801	1295296	+	2495	125	1227	0.0501002	0.107862	1.09451e-05	11.2385	7.44016e-110	99.88	b1049	membrane glycosyltransferase	COG2943	M	Membrane glycosyltransferase	N	N	N
EC958_1244	1244	1295389	1295529	+	140	6	102	0.0428571	0.0685331	5.70699e-05	8.52821	7.52596e-07	30.3	b1521	-	NA	NA	NA	N	N	N
EC958_1245	yceK	1295510	1295695	+	185	16	252	0.0864865	0.392987	2.7312e-09	23.7117	8.09681e-09	100	b1050	lipoprotein, DUF1375 family	COG5645	R	Predicted periplasmic lipoprotein	N	N	N
EC958_1246	msyB	1295714	1296070	-	356	15	100	0.0421348	0.0651101	6.72866e-05	8.2511	2.68517e-16	97.58	b1051	multicopy suppressor of secY and secA	NA	NA	NA	N	N	N
EC958_1247	mdtG	1296171	1297379	-	1208	66	648	0.0546358	0.136763	3.89154e-06	12.8825	1.45705e-53	99.75	b1053	predicted drug efflux system	COG2814	G	Arabinose efflux permease	N	N	N
EC958_1248	lpxL	1297569	1298471	-	902	0	0	0	0	1	-173.929	3.52827e-40	99.67	b1054	lauryl-acyl carrier protein (ACP)-dependent acyltransferase	COG1560	M	Lauroyl/myristoyl acyltransferase	Y	N	N
EC958_1249	yceA	1298714	1299748	+	1034	74	695	0.0715667	0.265923	8.19719e-08	18.7625	5.94339e-46	99.43	b1055	predicted rhodanese-related sulfurtransferase	COG1054	R	Predicted sulfurtransferase	N	N	N
EC958_1250	yceI	1299808	1300365	-	557	58	654	0.104129	0.538495	4.8912e-11	29.3807	4.33974e-25	99.48	b1056	secreted protein	COG2353	S	Uncharacterized conserved protein	N	N	N
EC958_1251	yceJ	1300387	1300935	-	548	61	779	0.111314	0.592723	9.5064e-12	31.6468	1.07427e-24	98.4	b1057	predicted cytochrome b561	COG3038	C	Cytochrome B561	N	N	N
EC958_1254	solA	1301375	1302475	-	1100	90	1024	0.0818182	0.352948	7.91763e-09	22.1811	7.71384e-49	98.66	b1059	N-methyltryptophan oxidase, FAD-binding	COG0665	E	Glycine/D-amino acid oxidases (deaminating)	N	N	N
EC958_1255	bssS	1302608	1302847	-	239	28	274	0.117155	0.633964	2.50994e-12	33.4742	3.51897e-11	100	b1060	biofilm regulator	NA	NA	NA	N	N	N
EC958_1256	dinI	1303151	1303378	-	227	14	117	0.061674	0.18705	7.82014e-07	15.3697	1.17837e-10	100	b1061	DNA damage-inducible protein I	NA	NA	NA	N	N	N
EC958_1257	pyrC	1303473	1304498	-	1025	56	501	0.0546341	0.136752	3.89298e-06	12.8819	1.47124e-45	99.71	b1062	dihydro-orotase	COG0418	F	Dihydroorotase	N	N	N
EC958_1258	yceB	1304622	1305164	-	542	47	648	0.0867159	0.394949	2.59203e-09	23.7865	1.96583e-24	100	b1063	lipoprotein, DUF1439 family	NA	NA	NA	N	N	N
EC958_1259	grxB	1305315	1305944	-	629	43	594	0.0683625	0.239583	1.70193e-07	17.675	3.07799e-28	99.53	b1064	glutaredoxin 2 (Grx2)	COG2999	O	Glutaredoxin 2	N	N	N
EC958_1260	mdtH	1306026	1307216	-	1190	104	1386	0.087395	0.400752	2.22023e-09	24.0079	8.92842e-53	100	b1065	multidrug resistance efflux transporter conferring overexpression resistance to norfloxacin and enoxacin	COG2814	G	Arabinose efflux permease	N	N	N
EC958_1261	rimJ	1307470	1308036	+	566	91	1169	0.160777	0.853922	1.20304e-16	46.8087	1.75313e-25	98.97	b1066	ribosomal-protein-S5-alanine N-acetyltransferase	COG1670	J	Acetyltransferases, including N-acetylases of ribosomal proteins	N	N	N
EC958_1262	yceH	1308065	1308694	+	629	48	560	0.0763116	0.305849	2.7787e-08	20.3555	3.07799e-28	98.6	b1067	conserved protein, UPF0502 family	COG3132	S	Uncharacterized protein conserved in bacteria	N	N	N
EC958_1263	yceM	1308714	1309619	+	905	70	798	0.0773481	0.314673	2.19388e-08	20.7009	2.60823e-40	96.09	b1068	predicted oxidoreductase with NAD(P)-binding Rossmann-fold domain	COG0673	R	Predicted dehydrogenases and related proteins	N	N	N
EC958_1264	murJ	1309747	1311264	+	1517	4	55	0.00263678	1.43617e-06	0.548167	-15.7256	4.44808e-67	99.8	b1069	probable peptidoglycan lipid II flippase required for murein synthesis	COG0728	R	Uncharacterized membrane protein, putative virulence factor	Y	Y	Y
EC958_1265	flgN	1311322	1311720	-	398	28	252	0.0703518	0.255864	1.08135e-07	18.3513	3.90787e-18	97.1	b1070	export chaperone for FlgK and FlgL	COG3418	NUO	Flagellar biosynthesis/type III secretory pathway chaperone	N	N	N
EC958_1266	flgM	1311743	1312018	-	275	16	115	0.0581818	0.161351	1.73381e-06	14.1444	9.37168e-13	98.97	b1071	anti-sigma factor for FliA (sigma 28)	COG2747	KNU	Negative regulator of flagellin synthesis (anti-sigma28 factor)	N	N	N
EC958_1267	flgA	1312112	1312753	-	641	49	526	0.0764431	0.306966	2.69665e-08	20.3994	9.1918e-29	97.72	b1072	assembly protein for flagellar basal-body periplasmic P ring	COG1261	NO	Flagellar basal body P-ring biosynthesis protein	N	N	N
EC958_1268	flgB	1312926	1313324	+	398	40	577	0.100503	0.509812	1.11822e-10	28.2284	3.90787e-18	99.28	b1073	flagellar component of cell-proximal portion of basal-body rod	COG1815	N	Flagellar basal body protein	N	N	N
EC958_1269	flgC	1313346	1313732	+	386	40	641	0.103627	0.534571	5.48471e-11	29.2215	1.3086e-17	100	b1074	flagellar component of cell-proximal portion of basal-body rod	COG1558	N	Flagellar basal body rod protein	N	N	N
EC958_1270	flgD	1313762	1314439	+	677	75	963	0.110783	0.588843	1.07299e-11	31.48	2.44795e-30	99.57	b1075	flagellar hook assembly protein	COG1843	N	Flagellar hook capping protein	N	N	N
EC958_1271	flgE	1314482	1315669	+	1187	97	1309	0.0817186	0.352094	8.09942e-09	22.1483	1.20779e-52	94.03	b1076	flagellar hook protein	COG1749	N	Flagellar hook protein FlgE	N	N	N
EC958_1272	flgF	1315707	1316444	+	737	60	731	0.0814111	0.349454	8.68762e-09	22.047	5.81395e-33	98.8	b1077	flagellar component of cell-proximal portion of basal-body rod	COG4787	N	Flagellar basal body rod protein	N	N	N
EC958_1273	flgG	1316634	1317398	+	764	54	919	0.0706806	0.258579	1.00324e-07	18.4628	3.83286e-34	100	b1078	flagellar component of cell-distal portion of basal-body rod	COG4786	N	Flagellar basal body rod protein	N	N	N
EC958_1274	flgH	1317470	1318150	+	680	49	880	0.0720588	0.270019	7.32722e-08	18.9287	1.80961e-30	99.57	b1079	flagellar protein of basal-body outer-membrane L ring	COG2063	N	Flagellar basal body L-ring protein	N	N	N
EC958_1275	flgI	1318180	1319259	+	1079	88	971	0.081557	0.350706	8.40344e-09	22.0951	6.3942e-48	99.73	b1080	predicted flagellar basal body protein	COG1706	N	Flagellar basal-body P-ring protein	N	N	N
EC958_1276	flgJ	1319277	1320200	+	923	45	570	0.0487541	0.0998896	1.48768e-05	10.7434	4.25644e-41	99.36	b1081	muramidase	COG3951	MNO	Rod binding protein	N	N	N
EC958_1277	flgK	1320284	1321909	+	1625	85	840	0.0523077	0.121548	6.61669e-06	12.0431	8.40189e-72	99.45	b1082	flagellar hook-filament junction protein 1	COG1256	N	Flagellar hook-associated protein	N	N	N
EC958_1278	flgL	1321939	1322874	+	935	37	350	0.0395722	0.0537292	0.000120691	7.25624	1.2711e-41	98.42	b1083	flagellar hook-filament junction protein	COG1344	N	Flagellin and related hook-associated proteins	N	N	N
EC958_1279	rne	1323087	1326254	-	3167	84	813	0.0265235	0.0143326	0.00236437	1.80447	3.01355e-139	98.68	b1084	fused ribonucleaseE: endoribonuclease/RNA-binding protein/RNA degradosome binding protein	COG1530	J	Ribonucleases G and E	N	Y	Y
EC958_1280	yceQ	1326407	1326709	+	302	15	210	0.0496689	0.105276	1.20762e-05	11.0803	6.1783e-14	99.06	b1085	predicted protein	NA	NA	NA	N	Y	Y
EC958_1281	rluC	1326845	1327786	+	941	84	675	0.0892667	0.416698	1.44897e-09	24.6165	6.94619e-42	99.69	b1086	23S rRNA pseudouridine synthase; specific to U955, U2504, and U2580	COG0564	J	Pseudouridylate synthases, 23S RNA-specific	N	N	N
EC958_1282	1282	1327826	1327933	+	107	5	31	0.046729	0.0884521	2.36064e-05	9.9915	2.08902e-05	29.41	b0956	-	NA	NA	NA	N	N	N
EC958_1283	yceF	1327916	1328521	-	605	63	1600	0.104132	0.538518	4.88789e-11	29.3817	3.45143e-27	99.48	b1087	Maf-like protein	COG0424	D	Nucleotide-binding protein implicated in inhibition of septum formation	N	N	N
EC958_1284	yceD	1328699	1329202	+	503	38	503	0.0755467	0.299356	3.30809e-08	20.1	9.9853e-23	100	b1088	conserved protein, DUF177 family	COG1399	R	Predicted metal-binding, possibly nucleic acid-binding protein	N	N	N
EC958_1285	rpmF	1329272	1329427	+	155	5	76	0.0322581	0.0278896	0.000639584	4.29573	1.66142e-07	100	b1089	50S ribosomal subunit protein L32	COG0333	J	Ribosomal protein L32	N	N	N
EC958_1286	plsX	1329556	1330578	+	1022	82	1156	0.0802348	0.339363	1.13599e-08	21.6586	1.99022e-45	99.71	b1090	probable phosphate acyltransferase	COG0416	I	Fatty acid/phospholipid biosynthesis enzyme	N	N	N
EC958_1287	fabH	1330664	1331599	+	935	0	0	0	0	1	-173.929	1.2711e-41	99.68	b1091	3-oxoacyl-[acyl-carrier-protein] synthase III	COG0332	I	3-oxoacyl-[acyl-carrier-protein] synthase III	Y	N	N
EC958_1288	fabD	1331633	1332544	+	911	1	10	0.00109769	3.42469e-08	0.778591	-20.3407	1.42532e-40	100	b1092	malonyl-CoA-[acyl-carrier-protein] transacylase	COG0331	I	(acyl-carrier-protein) S-malonyltransferase	Y	Y	Y
EC958_1289	fabG	1332575	1333291	+	716	2	2	0.0027933	1.83312e-06	0.528951	-15.407	4.81933e-32	100	b1093	3-oxoacyl-[acyl-carrier-protein] reductase	COG1028	IQR	Dehydrogenases with different specificities (related to short-chain alcohol dehydrogenases)	Y	Y	Y
EC958_1290	acpP	1333520	1333738	+	218	0	0	0	0	1	-173.929	2.91697e-10	100	b1094	acyl carrier protein (ACP)	COG0236	IQ	Acyl carrier protein	Y	Y	Y
EC958_1291	fabF	1333844	1335067	+	1223	74	814	0.060507	0.178311	1.02041e-06	14.962	3.21657e-54	99.76	b1095	3-oxoacyl-[acyl-carrier-protein] synthase II	COG0304	IQ	3-oxoacyl-(acyl-carrier-protein) synthase	N	N	N
EC958_1292	pabC	1335205	1335996	+	791	47	416	0.0594185	0.170294	1.30783e-06	14.5802	2.52682e-35	98.88	b1096	4-amino-4-deoxychorismate lyase component of para-aminobenzoate synthase multienzyme complex	COG0115	EH	Branched-chain amino acid aminotransferase/4-amino-4-deoxychorismate lyase	N	N	N
EC958_1293	yceG	1336017	1337021	+	1004	73	1235	0.0727092	0.27545	6.31749e-08	19.1479	1.21955e-44	99.71	b1097	predicted aminodeoxychorismate lyase	COG1559	R	Predicted periplasmic solute-binding protein	N	N	N
EC958_1294	tmk	1337029	1337652	+	623	2	9	0.00321027	3.29888e-06	0.480981	-14.6275	5.63248e-28	99.53	b1098	thymidylate kinase	COG0125	F	Thymidylate kinase	Y	Y	Y
EC958_1295	holB	1337667	1338653	+	986	4	75	0.0040568	8.82181e-06	0.396559	-13.277	7.47307e-44	97.6	b1099	DNA polymerase III, delta prime subunit	COG0470	L	ATPase involved in DNA replication	Y	Y	Y
EC958_1296	ycfH	1338682	1339461	+	779	54	594	0.0693196	0.247386	1.36825e-07	18.0009	8.46135e-35	100	b1100	predicted DNAse	COG0084	L	Mg-dependent DNase	N	N	N
EC958_1297	ptsG	1339774	1341189	+	1415	118	1309	0.0833922	0.366462	5.53016e-09	22.6988	1.28687e-62	99.79	b1101	fused glucose-specific PTS enzymes: IIB component/IIC component	COG1263	G	Phosphotransferase system IIC components, glucose/maltose/N-acetylglucosamine-specific	N	N	N
EC958_1298	fhuE	1341267	1343438	-	2171	201	2644	0.0925841	0.444725	6.80125e-10	25.69	1.104e-95	98.77	b1102	ferric-rhodotorulic acid outer membrane transporter	COG4773	P	Outer membrane receptor for ferric coprogen and ferric-rhodotorulic acid	N	N	N
EC958_1299	1299	1343489	1343641	-	152	8	106	0.0526316	0.123618	6.14568e-06	12.1605	2.24748e-07	27.78	b1607	-	NA	NA	NA	N	N	N
EC958_1300	hinT	1343790	1344131	+	341	26	343	0.0762463	0.305294	2.82036e-08	20.3337	1.21634e-15	99.16	b1103	purine nucleoside phosphoramidase	COG0537	FGR	Diadenosine tetraphosphate (Ap4A) hydrolase and other HIT family hydrolases	N	N	N
EC958_1301	ycfL	1344152	1344511	+	359	18	239	0.0501393	0.108098	1.0848e-05	11.2529	1.98497e-16	97.6	b1104	predicted protein	COG5633	R	Predicted periplasmic lipoprotein	N	N	N
EC958_1302	ycfM	1344543	1345166	+	623	37	393	0.05939	0.170087	1.31633e-06	14.5702	5.63248e-28	99.53	b1105	outer membrane lipoprotein	COG3417	R	Collagen-binding surface adhesin SpaP (antigen I/II family)	N	N	N
EC958_1303	thiK	1345165	1345971	+	806	51	712	0.0632754	0.199268	5.42807e-07	15.9264	5.57816e-36	97.81	b1106	thiamin kinase	COG0510	M	Predicted choline kinase involved in LPS biosynthesis	N	N	N
EC958_1304	nagZ	1346000	1347007	+	1007	52	801	0.0516385	0.117321	7.70724e-06	11.8002	9.01536e-45	98.83	b1107	beta N-acetyl-glucosaminidase	COG1472	G	Beta-glucosidase-related glycosidases	N	N	N
EC958_1305	ycfP	1347048	1347572	+	524	25	226	0.0477099	0.0939075	1.88755e-05	10.3568	1.20461e-23	100	b1108	conserved protein	COG3150	R	Predicted esterase	N	N	N
EC958_1306	ndh	1347989	1349275	+	1286	60	518	0.0466563	0.0880543	2.40008e-05	9.96436	5.64736e-57	99.54	b1109	respiratory NADH dehydrogenase 2/cupric reductase	COG1252	C	NADH dehydrogenase, FAD-containing subunit	N	N	N
EC958_1307	ycfJ	1349520	1350041	+	521	33	407	0.0633397	0.199763	5.34908e-07	15.9487	1.62953e-23	99.44	b1110	predicted protein	COG3134	S	Predicted outer membrane lipoprotein	N	N	N
EC958_1308	ycfQ	1350121	1350735	-	614	34	362	0.0553746	0.14175	3.28825e-06	13.147	1.39428e-27	98.1	b1111	predicted DNA-binding transcriptional regulator	COG1309	K	Transcriptional regulator	N	N	N
EC958_1309	bhsA	1350994	1351233	+	239	7	52	0.0292887	0.0201666	0.00125868	3.02868	3.51897e-11	100	b1112	biofilm, cell surface and signaling protein	NA	NA	NA	N	N	N
EC958_1310	ycfS	1351334	1352275	-	941	56	757	0.0595112	0.170972	1.28048e-06	14.6128	6.94619e-42	99.37	b1113	L,D-transpeptidase linking Lpp to murein	COG1376	S	Uncharacterized protein conserved in bacteria	N	N	N
EC958_1311	mfd	1352439	1355867	-	3428	214	2448	0.0624271	0.192764	6.5864e-07	15.6319	1.15675e-150	99.3	b1114	transcription-repair coupling factor	COG1197	LK	Transcription-repair coupling factor (superfamily II helicase)	N	N	N
EC958_1312	ycfT	1356012	1357067	-	1055	91	1306	0.0862559	0.391015	2.87861e-09	23.6364	7.16999e-47	95.52	b1115	inner membrane protein	COG4763	S	Predicted membrane protein	N	N	N
EC958_1313	lolC	1357346	1358527	+	1181	3	6	0.00254022	1.22621e-06	0.56037	-15.9305	2.21016e-52	100	b1116	lipoprotein-releasing system transmembrane protein	COG4591	M	ABC-type transport system, involved in lipoprotein release, permease component	Y	Y	Y
EC958_1314	lolD	1358538	1359221	+	683	1	1	0.00146413	1.17468e-07	0.716186	-18.8616	1.33773e-30	99.57	b1117	outer membrane-specific lipoprotein transporter subunit	COG1136	V	ABC-type antimicrobial peptide transport system, ATPase component	Y	Y	Y
EC958_1315	lolE	1359245	1360465	+	1220	1	1	0.000819672	9.78446e-09	0.829542	-21.8152	4.3512e-54	99.27	b1118	lipoprotein-releasing system transmembrane protein	COG4591	M	ABC-type transport system, involved in lipoprotein release, permease component	Y	Y	Y
EC958_1316	nagK	1360512	1361405	+	893	47	441	0.0526316	0.123618	6.14568e-06	12.1605	8.73397e-40	99.67	b1119	N-acetyl-D-glucosamine kinase	COG1940	KG	Transcriptional regulator/sugar kinase	N	N	N
EC958_1317	cobB	1361439	1362242	+	803	37	337	0.0460772	0.0849171	2.73883e-05	9.74764	7.54584e-36	99.63	b1120	deacetylase of acetyl-CoA synthetase	COG0846	K	NAD-dependent protein deacetylases, SIR2 family	N	N	N
EC958_1318	ycfZ	1362398	1363168	-	770	75	695	0.0974026	0.484694	2.2671e-10	27.2385	2.09454e-34	90.46	b1121	inner membrane protein	COG1512	R	Beta-propeller domains of methanol dehydrogenase type	N	N	N
EC958_1319	ymfA	1363183	1363626	-	443	37	289	0.0835214	0.367571	5.36962e-09	22.7413	4.20428e-20	95.42	b1122	conserved inner membrane protein	NA	NA	NA	N	N	N
EC958_1320	potD	1363702	1364730	-	1028	47	388	0.0457198	0.0830097	2.97133e-05	9.61353	1.0876e-45	99.71	b1123	polyamine transporter subunit	COG0687	E	Spermidine/putrescine-binding periplasmic protein	N	N	N
EC958_1321	potC	1364745	1365521	-	776	38	362	0.0489691	0.101143	1.41652e-05	10.8227	1.14461e-34	100	b1124	polyamine transporter subunit	COG1177	E	ABC-type spermidine/putrescine transport system, permease component II	N	N	N
EC958_1322	potB	1365536	1366375	-	839	55	581	0.0655542	0.217066	3.22854e-07	16.7133	2.0096e-37	99.27	b1125	polyamine transporter subunit	COG1176	E	ABC-type spermidine/putrescine transport system, permease component I	N	N	N
EC958_1323	potA	1366377	1367495	-	1118	57	543	0.0509839	0.113251	8.94785e-06	11.5617	1.25884e-49	100	b1126	polyamine transporter subunit	COG3842	E	ABC-type spermidine/putrescine transport systems, ATPase components	N	N	N
EC958_1324	pepT	1367763	1368971	+	1208	65	728	0.0538079	0.131264	4.69991e-06	12.5851	1.45705e-53	99.75	b1127	peptidase T	COG2195	E	Di- and tripeptidases	N	N	N
EC958_1325	ycfD	1369038	1370141	-	1103	54	644	0.0489574	0.101075	1.42029e-05	10.8184	5.70235e-49	99.73	b1128	conserved protein	COG2850	S	Uncharacterized conserved protein	N	N	N
EC958_1326	phoQ	1370235	1371677	-	1442	85	803	0.0589459	0.166856	1.45661e-06	14.4139	8.48371e-64	100	b1129	sensory histidine kinase in two-component regulatory system with PhoP	COG0642	T	Signal transduction histidine kinase	N	N	N
EC958_1327	phoP	1371695	1372348	-	653	56	487	0.085758	0.386752	3.22464e-09	23.4738	2.74495e-29	99.55	b1130	DNA-binding response regulator in two-component regulatory system with PhoQ	COG0745	TK	Response regulators consisting of a CheY-like receiver domain and a winged-helix DNA-binding domain	N	N	N
EC958_1328	purB	1372535	1373887	-	1352	14	46	0.010355	0.000412432	0.0943353	-7.08162	7.32962e-60	99.34	b1131	adenylosuccinate lyase	COG0015	F	Adenylosuccinate lyase	Y	Y	Y
EC958_1329	hflD	1373909	1374532	-	623	27	156	0.0433387	0.070867	5.1136e-05	8.7122	5.63248e-28	99.06	b1132	predicted lysogenization regulator	COG2915	R	Uncharacterized protein involved in purine metabolism	N	N	N
EC958_1330	mnmA	1374586	1375674	-	1088	18	46	0.0165441	0.00256011	0.0230064	-3.16026	2.58307e-48	99.46	b1133	tRNA (5-methylaminomethyl-2-thiouridylate)-methyltransferase	COG0482	J	Predicted tRNA(5-methylaminomethyl-2-thiouridylate) methyltransferase, contains the PP-loop ATPase domain	N	N	N
EC958_1331	nudJ	1375746	1376189	-	443	24	288	0.0541761	0.133697	4.32154e-06	12.7175	4.20428e-20	100	b1134	bifunctional thiamin pyrimidine pyrophosphate hydrolase/ thiamin pyrophosphate hydrolase	COG1051	F	ADP-ribose pyrophosphatase	N	N	N
EC958_1332	rluE	1376217	1376822	-	605	39	592	0.0644628	0.208484	4.14071e-07	16.3371	3.45143e-27	98.07	b1135	23S rRNA U2457 pseudouridine synthase	COG1187	J	16S rRNA uridine-516 pseudouridylate synthase and related pseudouridylate synthases	N	N	N
EC958_1333	icd	1377042	1378274	+	1232	7	10	0.00568182	3.58725e-05	0.27378	-11.2229	1.2994e-54	99.52	b1136	e14 prophage; isocitrate dehydrogenase, specific for NADP+	COG0538	C	Isocitrate dehydrogenases	Y	N	N
EC958_1334	intE	1378406	1379530	-	1124	265	2863	0.235765	0.978713	4.5207e-24	68.9581	6.87921e-50	60.48	b1140	e14 prophage; predicted integrase	COG4974	L	Site-specific recombinase XerD	N	N	N
EC958_1335	1335	1379914	1380135	-	221	77	1404	0.348416	0.999258	3.16815e-35	101.348	2.15633e-10	25.33	b2710	-	NA	NA	NA	N	N	N
EC958_1336	1336	1380137	1380445	-	308	67	808	0.217532	0.964963	2.8877e-22	63.6329	3.37626e-14	22.22	b0595	-	NA	NA	NA	N	N	N
EC958_1337	1337	1380463	1380666	-	203	52	1081	0.256158	0.988024	4.32511e-26	74.8802	1.32134e-09	48.57	b0803	-	COG1734	T	DnaK suppressor protein	N	N	N
EC958_1338	1338	1380783	1380980	-	197	26	329	0.13198	0.726058	8.54564e-14	38.0614	2.41795e-09	27.91	b1676	-	NA	NA	NA	N	N	N
EC958_1339	1339	1381075	1381206	-	131	17	180	0.129771	0.71351	1.41398e-13	37.3821	1.86299e-06	33.33	b2063	-	NA	NA	NA	N	N	N
EC958_1340	1340	1381418	1382080	-	662	58	795	0.0876133	0.402616	2.11242e-09	24.079	1.10888e-29	31.34	b4157	-	NA	NA	NA	N	N	N
EC958_1341	1341	1382095	1382862	-	767	52	707	0.0677966	0.234999	1.9363e-07	17.4819	2.83339e-34	20	b3554	-	NA	NA	NA	N	N	N
EC958_1342	1342	1382886	1383164	-	278	25	262	0.0899281	0.422312	1.24617e-09	24.831	6.92789e-13	30.95	b3836	-	NA	NA	NA	N	N	N
EC958_1343	1343	1383258	1383446	-	188	13	127	0.0691489	0.24599	1.42255e-07	17.9429	5.98545e-09	39.71	b1352	-	NA	NA	NA	N	N	N
EC958_1344	1344	1384060	1384797	-	737	5	18	0.00678426	7.44721e-05	0.212932	-10.0748	5.81395e-33	35.71	b1183	-	COG2932	K	Predicted transcriptional regulator	Y	N	N
EC958_1345	1345	1384854	1385066	+	212	9	215	0.0424528	0.0666055	6.25808e-05	8.37327	5.33783e-10	30.16	b1357	-	COG4197	S	Uncharacterized protein conserved in bacteria, prophage-related	N	N	N
EC958_1346	1346	1385154	1385675	+	521	29	226	0.0556622	0.143711	3.07955e-06	13.2497	1.62953e-23	36.04	b1358	-	NA	NA	NA	N	N	N
EC958_1347	1347	1385690	1386691	+	1001	70	519	0.0699301	0.252392	1.19048e-07	18.2083	1.64974e-44	33.33	b0728	-	NA	NA	NA	N	N	N
EC958_1348	1348	1386706	1387389	+	683	58	490	0.0849195	0.379566	3.90404e-09	23.1995	1.33773e-30	25.89	b1727	-	NA	NA	NA	N	N	N
EC958_1349	1349	1387657	1391547	+	3890	599	7457	0.153985	0.829387	5.66088e-16	44.7616	7.17618e-171	30.03	b1978	-	NA	NA	NA	N	N	N
EC958_1350	1350	1391602	1392627	-	1025	206	2879	0.200976	0.94573	1.25882e-20	58.7682	1.47124e-45	31.43	b0476	-	COG0657	I	Esterase/lipase	N	N	N
EC958_1351	ybcN	1393093	1393530	+	437	44	533	0.100686	0.511286	1.07228e-10	28.287	7.69351e-20	94.04	b0547	DLP12 prophage; predicted protein	NA	NA	NA	N	N	N
EC958_1352	ninE	1393548	1393700	+	152	13	292	0.0855263	0.384767	3.39959e-09	23.3981	2.24748e-07	98.21	b0548	DLP12 prophage; conserved protein	NA	NA	NA	N	N	N
EC958_1353	ybcO	1393711	1393983	+	272	14	150	0.0514706	0.116271	8.00808e-06	11.7391	1.26775e-12	97.92	b0549	DLP12 prophage; predicted protein	NA	NA	NA	N	N	N
EC958_1354	rusA	1393998	1394342	+	344	30	437	0.0872093	0.399167	2.31623e-09	23.9474	8.99161e-16	93.33	b0550	DLP12 prophage; endonuclease RUS	COG4570	L	Holliday junction resolvase	N	N	N
EC958_1355	ylcG	1394357	1394479	+	122	8	66	0.0655738	0.21722	3.21419e-07	16.72	4.6117e-06	84.09	b4509	expressed protein, DLP12 prophage	NA	NA	NA	N	N	N
EC958_1356	1356	1394494	1395165	+	671	52	569	0.0774963	0.315936	2.12099e-08	20.7503	4.47956e-30	30	b3531	-	NA	NA	NA	N	N	N
EC958_1357	1357	1395493	1395792	+	299	38	487	0.12709	0.697727	2.60542e-13	36.5559	8.35767e-14	33.33	b2308	-	NA	NA	NA	N	N	N
EC958_1358	1358	1395797	1396255	+	458	44	424	0.0960699	0.473743	3.07209e-10	26.8114	9.2813e-21	37.5	b3718	-	COG4678	G	Muramidase (phage lambda lysozyme)	N	N	N
EC958_1359	rzpD	1396270	1396602	+	332	42	290	0.126506	0.694206	2.97668e-13	36.3755	3.01095e-15	93.16	b0556	DLP12 prophage; predicted murein endopeptidase	NA	NA	NA	N	N	N
EC958_1360	borD	1396625	1396870	-	245	55	909	0.22449	0.970975	5.91094e-23	65.6686	1.92302e-11	92.05	b0557	DLP12 prophage; predicted lipoprotein	NA	NA	NA	N	N	N
EC958_1361	1361	1397456	1397677	+	221	54	556	0.244344	0.983252	6.39382e-25	71.4534	2.15633e-10	41.43	b1252	-	COG0810	M	Periplasmic protein TonB, links inner and outer membranes	N	N	N
EC958_1362	1362	1397902	1398066	+	164	21	288	0.128049	0.70344	2.09398e-13	36.8515	6.71165e-08	32.43	b2950	-	NA	NA	NA	N	N	N
EC958_1363	nohD	1398648	1399175	+	527	34	426	0.0645161	0.208901	4.09068e-07	16.3555	8.90489e-24	98.9	b0560	DLP12 prophage; DNA packaging protein	COG4220	L	Phage DNA packaging protein, Nu1 subunit of terminase	N	N	N
EC958_1364	1364	1399168	1401075	+	1907	138	1904	0.072365	0.272573	6.83322e-08	19.0319	3.89066e-84	27.54	b0622	-	COG5525	R	Bacteriophage tail assembly protein	N	N	N
EC958_1365	1365	1401090	1401278	+	188	12	138	0.0638298	0.203555	4.78361e-07	16.1184	5.98545e-09	34.09	b1552	-	NA	NA	NA	N	N	N
EC958_1366	1366	1401293	1402876	+	1583	128	1787	0.0808591	0.344718	9.85277e-09	21.8648	5.77309e-70	21.77	b2118	-	COG5511	R	Bacteriophage capsid protein	N	N	N
EC958_1367	1367	1402875	1404176	+	1301	132	2779	0.10146	0.517466	8.98829e-11	28.5333	1.2467e-57	27.37	b1272	-	COG0616	OU	Periplasmic serine proteases (ClpP class)	N	N	N
EC958_1368	1368	1404204	1404518	+	314	29	651	0.0923567	0.442816	7.16312e-10	25.6166	1.84503e-14	31.82	b0919	-	NA	NA	NA	N	N	N
EC958_1369	1369	1404592	1405032	+	440	27	404	0.0613636	0.184712	8.39357e-07	15.2615	5.68733e-20	23.65	b2420	-	NA	NA	NA	N	N	N
EC958_1370	1370	1405054	1405602	+	548	55	981	0.100365	0.508709	1.15384e-10	28.1845	1.07427e-24	40	b0269	-	NA	NA	NA	N	N	N
EC958_1371	1371	1405662	1406042	+	380	31	775	0.0815789	0.350895	8.36149e-09	22.1023	2.39463e-17	26.02	b1923	-	NA	NA	NA	N	N	N
EC958_1372	1372	1406072	1406407	+	335	31	423	0.0925373	0.444333	6.87413e-10	25.6749	2.2258e-15	23.81	b0742	-	NA	NA	NA	N	N	N
EC958_1373	1373	1406437	1406997	+	560	39	715	0.0696429	0.250034	1.27105e-07	18.1108	3.20809e-25	29.11	b4351	-	NA	NA	NA	N	N	N
EC958_1374	1374	1407012	1407389	+	377	36	515	0.0954907	0.468958	3.50574e-10	26.6255	3.23933e-17	29.91	b0676	-	NA	NA	NA	N	N	N
EC958_1375	1375	1407415	1408137	+	722	57	770	0.0789474	0.328335	1.52354e-08	21.2323	2.63363e-32	27.17	b4291	-	COG5492	N	Bacterial surface proteins containing Ig-like domains	N	N	N
EC958_1376	1376	1408171	1408575	+	404	22	306	0.0544554	0.135557	4.05486e-06	12.8178	2.13553e-18	24.66	b1299	-	NA	NA	NA	N	N	N
EC958_1377	1377	1408575	1408991	+	416	35	657	0.0841346	0.372833	4.66905e-09	22.9424	6.37735e-19	44.44	b4528	-	NA	NA	NA	N	N	N
EC958_1378	1378	1409002	1411545	+	2543	205	3288	0.0806134	0.34261	1.04204e-08	21.7837	5.91722e-112	21.04	b1372	-	COG5281	S	Phage-related minor tail protein	N	N	N
EC958_1379	1379	1411560	1411871	+	311	29	435	0.0932476	0.450287	5.84639e-10	25.904	2.49585e-14	46.67	b3696	-	COG4718	S	Phage-related protein	N	N	N
EC958_1380	1380	1411889	1412569	+	680	69	906	0.101471	0.517547	8.96747e-11	28.5366	1.80961e-30	47.22	b1868	-	COG4672	S	Phage-related protein	N	N	N
EC958_1381	1381	1412592	1412996	+	404	45	698	0.111386	0.593249	9.35105e-12	31.6695	2.13553e-18	26.88	b2065	-	COG1310	R	Predicted metal-dependent protease of the PAD1/JAB1 superfamily	N	N	N
EC958_1382	1382	1413073	1413597	+	524	50	522	0.0954198	0.468371	3.56285e-10	26.6028	1.20461e-23	30	b3527	-	COG4723	S	Phage-related protein, tail component	N	N	N
EC958_1383	1383	1413676	1414317	+	641	83	1058	0.129485	0.711856	1.50919e-13	37.2941	9.1918e-29	23.17	b4335	-	COG4733	S	Phage-related protein, tail component	N	N	N
EC958_1384	1384	1414383	1416836	+	2453	224	2570	0.0913168	0.434059	9.07975e-10	25.2806	5.11227e-108	26.47	b2229	-	COG4733	S	Phage-related protein, tail component	N	N	N
EC958_1385	stfR	1416913	1418916	+	2003	498	10810	0.248627	0.985159	2.40798e-25	72.6971	2.4609e-88	62.12	b1372	Rac prophage; predicted tail fiber protein	COG3064	M	Membrane protein involved in colicin uptake	N	N	N
EC958_1386	1386	1418931	1419191	+	260	52	493	0.2	0.94434	1.57241e-20	58.4805	4.24522e-12	26.23	b3721	-	NA	NA	NA	N	N	N
EC958_1387	1387	1419222	1419497	+	275	53	560	0.192727	0.932909	8.25451e-20	56.3328	9.37168e-13	30.11	b4086	-	NA	NA	NA	N	N	N
EC958_1388	1388	1419607	1420446	-	839	88	785	0.104887	0.544381	4.11537e-11	29.6207	2.0096e-37	28.29	b1859	-	COG1108	P	ABC-type Mn2+/Zn2+ transport systems, permease components	N	N	N
EC958_1389	1389	1420461	1421300	-	839	58	570	0.0691299	0.245834	1.42873e-07	17.9364	2.0096e-37	28.29	b1859	-	COG1108	P	ABC-type Mn2+/Zn2+ transport systems, permease components	N	N	N
EC958_1390	1390	1421315	1422124	-	809	49	420	0.0605686	0.178769	1.00616e-06	14.9836	4.12358e-36	31.73	b0151	-	COG1121	P	ABC-type Mn/Zn transport systems, ATPase component	N	N	N
EC958_1391	1391	1422142	1422915	-	773	60	683	0.0776197	0.316989	2.06215e-08	20.7913	1.54836e-34	25.5	b1955	-	COG0803	P	ABC-type metal ion transport system, periplasmic component/surface adhesin	N	N	N
EC958_1392	1392	1423743	1424495	+	752	12	53	0.0159574	0.00223183	0.026299	-3.49216	1.28348e-33	32.14	b3848	-	NA	NA	NA	N	N	N
EC958_1393	icd	1424985	1425119	+	134	4	27	0.0298507	0.02151	0.0011073	3.272	1.37719e-06	96	b1136	e14 prophage; isocitrate dehydrogenase, specific for NADP+	COG0538	C	Isocitrate dehydrogenases	N	N	N
EC958_1394	ycgX	1425399	1425785	-	386	4	28	0.0103627	0.00041365	0.0941706	-7.076	1.3086e-17	99.25	b1161	predicted protein	COG5562	R	Phage envelope protein	Y	N	N
EC958_1395	ycgE	1426024	1426737	-	713	71	471	0.0995792	0.502386	1.38021e-10	27.934	6.51934e-32	98.35	b1162	repressor of blue light-responsive genes	COG0789	K	Predicted transcriptional regulators	N	N	N
EC958_1396	ycgF	1426960	1428330	-	1370	94	515	0.0686131	0.24162	1.60739e-07	17.7604	1.19614e-60	89.22	b1163	anti-repressor for YcgE, blue light-responsive; FAD-binding; has c-di-GMP phosphodiesterase-like EAL domain, but does not degrade c-di-GMP	COG2200	T	FOG: EAL domain	N	N	N
EC958_1397	ycgZ	1428584	1428802	+	218	18	112	0.0825688	0.359393	6.67222e-09	22.4282	2.91697e-10	96.15	b1164	connector protein for RcsB regulation of biofilm and acid-resistance	NA	NA	NA	N	N	N
EC958_1398	1398	1428797	1428952	-	155	8	20	0.0516129	0.117161	7.75241e-06	11.7909	1.66142e-07	40	b3515	-	NA	NA	NA	N	N	N
EC958_1399	ymgA	1428980	1429117	+	137	2	40	0.0145985	0.00158692	0.0358504	-4.28669	1.01807e-06	88.24	b1165	connector protein for RcsB regulation of biofilm	NA	NA	NA	Y	N	N
EC958_1400	ariR	1429164	1429412	+	248	4	20	0.016129	0.00232459	0.02529	-3.39444	1.42156e-11	97.73	b1166	connector protein for RcsB regulation of biofilm and acid-resistance	NA	NA	NA	N	N	N
EC958_1401	ymgC	1429615	1429773	+	158	4	28	0.0253165	0.0121749	0.00311341	1.25432	1.22818e-07	96.55	b1167	predicted protein	NA	NA	NA	N	N	N
EC958_1402	ycgG	1430131	1430964	+	833	43	234	0.0516206	0.117209	7.73873e-06	11.7937	3.67741e-37	98.23	b1168	predicted cyclic-di-GMP phosphodiesterase	COG2200	T	FOG: EAL domain	N	N	N
EC958_1403	ymgF	1431078	1431314	+	236	19	92	0.0805085	0.34171	1.06728e-08	21.749	4.76028e-11	97.22	b4520	inner membrane division septum protein	NA	NA	NA	N	N	N
EC958_1404	1404	1431415	1431549	+	134	3	6	0.0223881	0.00785328	0.00607013	-0.127915	1.37719e-06	34.48	b1679	-	NA	NA	NA	N	N	N
EC958_1405	1405	1431914	1432159	+	245	8	51	0.0326531	0.0290349	0.000584503	4.46105	1.92302e-11	33.33	b1923	-	NA	NA	NA	N	N	N
EC958_1406	1406	1432201	1432545	+	344	12	53	0.0348837	0.0360342	0.00035149	5.38194	8.99161e-16	33.8	b0424	-	NA	NA	NA	N	N	N
EC958_1407	1407	1432865	1433218	+	353	37	309	0.104816	0.543832	4.18244e-11	29.5982	3.63235e-16	27.87	b2233	-	COG3468	MU	Type V secretory pathway, adhesin AidA	N	N	N
EC958_1408	ymgD	1433295	1433606	-	311	24	161	0.0771704	0.313158	2.28457e-08	20.6418	2.49585e-14	100	b1171	predicted protein	NA	NA	NA	N	N	N
EC958_1409	ymgG	1433634	1433960	-	326	57	636	0.174847	0.895348	4.86612e-18	51.0222	5.50981e-15	99.12	b1172	conserved protein, UPF0757 family	NA	NA	NA	N	N	N
EC958_1410	ymgI	1433980	1434135	-	155	9	57	0.0580645	0.160512	1.7808e-06	14.103	1.66142e-07	92.86	b4593	hypothetical protein	NA	NA	NA	N	N	N
EC958_1411	ypjA	1434570	1434863	+	293	28	222	0.0955631	0.469557	3.44833e-10	26.6488	1.52939e-13	83.02	b2647	adhesin-like autotransporter	NA	NA	NA	N	N	N
EC958_1412	minE	1435262	1435510	-	248	5	40	0.0201613	0.00536029	0.0100852	-1.23306	1.42156e-11	100	b1174	cell division topological specificity factor	COG0851	D	Septum formation topological specificity factor	N	Y	Y
EC958_1413	minD	1435532	1436326	-	794	65	1035	0.081864	0.353341	7.83539e-09	22.1962	1.86792e-35	100	b1175	membrane ATPase of the MinC-MinD-MinE system	COG2894	D	Septum formation inhibitor-activating ATPase	N	Y	Y
EC958_1414	minC	1436368	1437045	-	677	62	874	0.0915805	0.436284	8.54984e-10	25.3659	2.44795e-30	99.13	b1176	cell division inhibitor	COG0850	D	Septum formation inhibitor	N	N	N
EC958_1415	ycgJ	1437583	1437933	+	350	38	389	0.108571	0.572457	1.7765e-11	30.7843	4.91365e-16	98.36	b1177	predicted protein	NA	NA	NA	N	N	N
EC958_1416	ycgK	1438054	1438437	-	383	77	973	0.201044	0.945827	1.23924e-20	58.7884	1.7702e-17	98.5	b1178	predicted protein	NA	NA	NA	N	N	N
EC958_1417	1417	1438526	1438666	+	140	10	134	0.0714286	0.264775	8.45951e-08	18.7158	7.52596e-07	40.91	b1769	-	NA	NA	NA	N	N	N
EC958_1418	ycgL	1438696	1438971	+	275	10	121	0.0363636	0.0411812	0.000250828	5.98191	9.37168e-13	100	b1179	conserved protein	COG3100	S	Uncharacterized protein conserved in bacteria	N	N	N
EC958_1419	ycgM	1439061	1439702	+	641	49	416	0.0764431	0.306966	2.69665e-08	20.3994	9.1918e-29	99.09	b1180	predicted isomerase/hydrolase	COG0179	Q	2-keto-4-pentenoate hydratase/2-oxohepta-3-ene-1,7-dioic acid hydratase (catechol pathway)	N	N	N
EC958_1420	ycgN	1439797	1440240	+	443	51	368	0.115124	0.619932	3.98779e-12	32.8403	4.20428e-20	99.35	b1181	conserved protein	COG2983	S	Uncharacterized conserved protein	N	N	N
EC958_1421	hlyE	1440465	1440728	-	263	24	247	0.0912548	0.433536	9.20901e-10	25.2606	3.13822e-12	95.7	b1182	hemolysin E	NA	NA	NA	N	N	N
EC958_1422	umuD	1441051	1441452	+	401	31	254	0.0773067	0.31432	2.21466e-08	20.6872	2.88884e-18	99.28	b1183	DNA polymerase V, subunit D	COG1974	KT	SOS-response transcriptional repressors (RecA-mediated autopeptidases)	N	N	N
EC958_1423	umuC	1441470	1442720	+	1250	58	411	0.0464	0.0866588	2.54451e-05	9.86853	2.12053e-55	98.58	b1184	DNA polymerase V, subunit C	COG0389	L	Nucleotidyltransferase/DNA polymerase involved in DNA repair	N	N	N
EC958_1424	dsbB	1442783	1443295	-	512	24	226	0.046875	0.089254	2.28334e-05	10.046	4.03377e-23	98.86	b1185	oxidoreductase that catalyzes reoxidation of DsbA protein disulfide isomerase I	COG1495	O	Disulfide bond formation protein DsbB	N	N	N
EC958_1425	nhaB	1443459	1444982	-	1523	104	1287	0.0682863	0.238964	1.73175e-07	17.649	2.43074e-67	99.22	b1186	sodium:proton antiporter	COG3067	P	Na+/H+ antiporter	N	N	N
EC958_1426	fadR	1445222	1445923	+	701	62	974	0.0884451	0.409708	1.74751e-09	24.3496	2.18308e-31	100	b1187	DNA-binding transcriptional dual regulator of fatty acid metabolism	COG2186	K	Transcriptional regulators	N	N	N
EC958_1427	ycgB	1445993	1447507	-	1514	114	1407	0.0752972	0.297243	3.50173e-08	20.0166	6.01712e-67	100	b1188	conserved protein	COG2719	S	Uncharacterized conserved protein	N	N	N
EC958_1428	dadA	1447882	1449135	+	1253	72	854	0.0574621	0.156231	2.04299e-06	13.8898	1.56757e-55	99.29	b1189	D-amino acid dehydrogenase	COG0665	E	Glycine/D-amino acid oxidases (deaminating)	N	N	N
EC958_1429	dadX	1449163	1450215	+	1052	57	582	0.0541825	0.13374	4.31521e-06	12.7198	9.69918e-47	98.88	b1190	alanine racemase 2, PLP-binding	COG0787	M	Alanine racemase	N	N	N
EC958_1430	cvrA	1450290	1452008	-	1718	111	1360	0.06461	0.209636	4.00405e-07	16.3879	7.18893e-76	98.96	b1191	predicted cation/proton antiporter	COG3263	P	NhaP-type Na+/H+ and K+/H+ antiporters with a unique C-terminal domain	N	N	N
EC958_1431	ldcA	1452121	1453017	-	896	78	1004	0.0870536	0.397836	2.39995e-09	23.8966	6.45647e-40	98.36	b1192	L,D-carboxypeptidase A	COG1619	V	Uncharacterized proteins, homologs of microcin C7 resistance protein MccF	N	N	N
EC958_1432	emtA	1453135	1453728	+	593	50	591	0.084317	0.374398	4.47885e-09	23.0022	1.15575e-26	98.52	b1193	lytic murein endotransglycosylase E	COG0741	M	Soluble lytic murein transglycosylase and related regulatory proteins (some contain LysM/invasin domains)	N	N	N
EC958_1433	ycgR	1453748	1454464	-	716	48	683	0.0670391	0.228898	2.30132e-07	17.2228	4.81933e-32	96.72	b1194	flagellar velocity braking protein, c-di-GMP-regulated	COG5581	M	Predicted glycosyltransferase	N	N	N
EC958_1434	ymgE	1454683	1454919	+	236	15	128	0.0635593	0.201459	5.08787e-07	16.0247	4.76028e-11	97.62	b1195	predicted inner membrane protein	COG2261	S	Predicted membrane protein	N	N	N
EC958_1435	1435	1454987	1456939	-	1952	152	1556	0.0778689	0.319116	1.94826e-08	20.8742	4.18576e-86	21.95	b2155	-	COG4771	P	Outer membrane receptor for ferrienterochelin and colicins	N	N	N
EC958_1436	1436	1456983	1457819	-	836	46	430	0.0550239	0.139373	3.56194e-06	13.0215	2.71848e-37	25.48	b0109	-	COG0157	H	Nicotinate-nucleotide pyrophosphorylase	N	N	N
EC958_1437	1437	1457834	1458628	-	794	49	374	0.0617128	0.187343	7.7512e-07	15.3833	1.86792e-35	28.12	b1822	-	COG2265	J	SAM-dependent methyltransferases related to tRNA (uracil-5-)-methyltransferase	N	N	N
EC958_1438	1438	1458656	1459396	-	740	51	561	0.0689189	0.244112	1.49915e-07	17.8646	4.29788e-33	32.53	b0151	-	COG1120	PH	ABC-type cobalamin/Fe3+-siderophores transport systems, ATPase components	N	N	N
EC958_1439	1439	1459411	1460349	-	938	45	403	0.0479744	0.0954059	1.77709e-05	10.4549	9.39644e-42	37.06	b1711	-	COG0609	P	ABC-type Fe3+-siderophore transport system, permease component	N	N	N
EC958_1440	1440	1460367	1461371	-	1004	62	501	0.061753	0.187647	7.68058e-07	15.3973	1.21955e-44	25	b4290	-	COG0614	P	ABC-type Fe3+-hydroxamate transport system, periplasmic component	N	N	N
EC958_1441	treA	1461719	1463398	-	1679	128	1219	0.0762359	0.305205	2.8271e-08	20.3302	3.65157e-74	97.7	b1197	periplasmic trehalase	COG1626	G	Neutral trehalase	N	N	N
EC958_1442	dhaM	1463736	1465136	-	1400	140	1167	0.1	0.505776	1.25396e-10	28.0682	5.82931e-62	98.52	b1198	fused predicted dihydroxyacetone-specific PTS enzymes: HPr component/EI component	COG1080	G	Phosphoenolpyruvate-protein kinase (PTS system EI component in bacteria)	N	N	N
EC958_1443	dhaL	1465165	1465779	-	614	25	289	0.0407166	0.0586636	9.29729e-05	7.70286	1.39428e-27	97.62	b1199	dihydroxyacetone kinase, C-terminal domain	COG2376	G	Dihydroxyacetone kinase	N	N	N
EC958_1444	dhaK	1465808	1466860	-	1052	69	716	0.0655894	0.217344	3.20279e-07	16.7253	9.69918e-47	98.88	b1200	dihydroxyacetone kinase, PTS-dependent, dihydroxyacetone-binding subunit	COG2376	G	Dihydroxyacetone kinase	N	N	N
EC958_1445	dhaR	1467106	1469007	+	1901	166	1806	0.0873225	0.400133	2.25724e-09	23.9842	7.1196e-84	99.53	b1201	DNA-binding transcription activator of the dhaKLM operon	COG3284	QK	Transcriptional activator of acetoin/glycerol metabolism	N	N	N
EC958_1446	1446	1470317	1472056	+	1739	19	152	0.0109258	0.000510557	0.082824	-6.66994	8.67259e-77	23.31	b1784	-	NA	NA	NA	Y	N	N
EC958_1447	1447	1472321	1473430	+	1109	203	1996	0.183048	0.914422	7.50113e-19	53.4636	3.11617e-49	28.95	b4351	-	NA	NA	NA	N	N	N
EC958_1448	1448	1473962	1475830	+	1868	208	1175	0.111349	0.592979	9.43048e-12	31.6579	1.97623e-82	23.01	b1232	-	COG0419	L	ATPase involved in DNA repair	N	N	N
EC958_1449	1449	1476728	1477045	-	317	22	232	0.0694006	0.248048	1.34322e-07	18.0285	1.36391e-14	46.15	b4410	-	NA	NA	NA	N	N	N
EC958_1450	1450	1477468	1477977	-	509	62	759	0.121807	0.664849	8.689e-13	34.9213	5.45667e-23	28.36	b3903	-	NA	NA	NA	N	N	N
EC958_1451	1451	1478536	1478868	+	332	24	172	0.0722892	0.27194	6.95236e-08	19.0064	3.01095e-15	35.06	b0541	-	NA	NA	NA	N	N	N
EC958_1452	1452	1479211	1479615	+	404	59	518	0.14604	0.796475	3.46395e-15	42.3554	2.13553e-18	20.55	b4240	-	NA	NA	NA	N	N	N
EC958_1453	1453	1479753	1480196	+	443	28	187	0.0632054	0.198728	5.51542e-07	15.9021	4.20428e-20	28.77	b1342	-	NA	NA	NA	N	N	N
EC958_1454	1454	1480474	1480650	+	176	11	102	0.0625	0.19332	6.47779e-07	15.6572	2.0043e-08	53.97	b0247	-	COG2003	L	DNA repair proteins	N	N	N
EC958_1455	1455	1480730	1481626	+	896	69	495	0.0770089	0.311782	2.37025e-08	20.588	6.45647e-40	29.26	b2894	-	COG4974	L	Site-specific recombinase XerD	N	N	N
EC958_1456	1456	1481631	1482227	-	596	31	203	0.0520134	0.119681	7.07584e-06	11.9364	8.54375e-27	29.2	b3405	-	NA	NA	NA	N	N	N
EC958_1457	1457	1482468	1482647	+	179	19	338	0.106145	0.554076	3.08886e-11	30.0188	1.48165e-08	35.48	b2624	-	COG3311	K	Predicted transcriptional regulator	N	N	N
EC958_1458	1458	1483222	1484058	+	836	118	1475	0.141148	0.773798	1.05656e-14	40.867	2.71848e-37	29.09	b1828	-	NA	NA	NA	N	N	N
EC958_1459	1459	1484677	1485711	+	1034	113	1523	0.109284	0.577779	1.50999e-11	31.0088	5.94339e-46	42.31	b2012	-	NA	NA	NA	N	N	N
EC958_1460	1460	1485839	1486033	+	194	30	339	0.154639	0.831892	4.87604e-16	44.9592	3.27088e-09	28.85	b0342	-	NA	NA	NA	N	N	N
EC958_1461	1461	1486229	1486408	+	179	13	254	0.0726257	0.274752	6.43886e-08	19.1198	1.48165e-08	30	b4105	-	NA	NA	NA	N	N	N
EC958_1462	1462	1487048	1489687	+	2639	219	2501	0.082986	0.362974	6.06685e-09	22.5654	3.74273e-116	23.86	b0709	-	COG5373	S	Predicted membrane protein	N	N	N
EC958_1463	1463	1489702	1489896	+	194	16	227	0.0824742	0.358581	6.81767e-09	22.3971	3.27088e-09	31.43	b0987	-	NA	NA	NA	N	N	N
EC958_1464	1464	1489901	1491079	+	1178	60	500	0.0509338	0.112943	9.05067e-06	11.5434	2.98979e-52	22.97	b3778	-	NA	NA	NA	N	N	N
EC958_1465	1465	1491284	1491403	-	119	20	159	0.168067	0.876867	2.28276e-17	48.9961	6.23846e-06	20.51	b1728	-	NA	NA	NA	N	N	N
EC958_1466	1466	1491979	1492212	+	233	23	195	0.0987124	0.49537	1.6818e-10	27.6573	6.43946e-11	34.29	b2143	-	COG1484	L	DNA replication protein	N	N	N
EC958_1467	1467	1492365	1492517	+	152	16	109	0.105263	0.547292	3.77694e-11	29.7398	2.24748e-07	30.43	b0026	-	NA	NA	NA	N	N	N
EC958_1468	1468	1492853	1493326	-	473	36	439	0.0761099	0.304135	2.90944e-08	20.2882	2.04893e-21	58.33	b0541	-	COG2801	L	Transposase and inactivated derivatives	N	N	N
EC958_1469	1469	1493704	1493970	-	266	19	192	0.0714286	0.264775	8.45951e-08	18.7158	2.31989e-12	38.89	b1027	-	COG2963	L	Transposase and inactivated derivatives	N	N	N
EC958_1470	1470	1494099	1495256	-	1157	75	746	0.0648228	0.211304	3.81442e-07	16.4613	2.47831e-51	36.67	b2622	-	COG0582	L	Integrase	N	N	N
EC958_1471	ychF	1495489	1496562	-	1073	50	422	0.0465983	0.0877377	2.43201e-05	9.94269	1.17009e-47	99.72	b1203	predicted GTP-binding protein	COG0012	J	Predicted GTPase, probable translation factor	N	N	N
EC958_1472	pth	1496697	1497263	-	566	3	15	0.00530035	2.68987e-05	0.298658	-11.6592	1.75313e-25	98.97	b1204	peptidyl-tRNA hydrolase	COG0193	J	Peptidyl-tRNA hydrolase	Y	Y	Y
EC958_1473	ychH	1497559	1497819	+	260	19	235	0.0730769	0.27853	5.80938e-08	19.2717	4.24522e-12	100	b1205	predicted inner membrane protein	NA	NA	NA	N	N	N
EC958_1474	ychM	1497892	1499553	-	1661	116	1373	0.0698374	0.251631	1.21589e-07	18.1769	2.23758e-73	99.64	b1206	predicted transporter	COG0659	P	Sulfate permease and related transporters (MFS superfamily)	N	N	N
EC958_1475	prs	1499696	1500691	-	995	2	11	0.00201005	4.53752e-07	0.632369	-17.1956	3.0189e-44	99.68	b1207	phosphoribosylpyrophosphate synthase	COG0462	FE	Phosphoribosylpyrophosphate synthetase	Y	Y	Y
EC958_1476	ispE	1500794	1501627	-	833	1	7	0.00120048	5.0248e-08	0.760557	-19.8841	3.67741e-37	98.94	b1208	4-diphosphocytidyl-2-C-methylerythritol kinase	COG1947	I	4-diphosphocytidyl-2C-methyl-D-erythritol 2-phosphate synthase	Y	Y	Y
EC958_1477	lolB	1501645	1502250	-	605	0	0	0	0	1	-173.929	3.45143e-27	99.03	b1209	OM lipoprotein required for localization of lipoproteins	COG3017	M	Outer membrane lipoprotein involved in outer membrane biogenesis	Y	Y	Y
EC958_1478	hemA	1502482	1503720	+	1238	0	0	0	0	1	-173.929	7.10085e-55	98.56	b1210	glutamyl tRNA reductase	COG0373	H	Glutamyl-tRNA reductase	Y	Y	Y
EC958_1479	prfA	1503780	1504844	+	1064	1	12	0.00093985	1.76016e-08	0.807121	-21.1272	2.89647e-47	100	b1211	peptide chain release factor RF-1	COG0216	J	Protein chain release factor A	Y	Y	Y
EC958_1480	prmC	1504862	1505677	+	815	33	338	0.0404908	0.057671	9.7885e-05	7.61504	2.25342e-36	99.28	b1212	N5-glutamine methyltransferase, modifies release factors RF-1 and RF-2	COG2890	J	Methylase of polypeptide chain release factors	N	Y	Y
EC958_1481	ychQ	1505692	1506066	+	374	27	181	0.0721925	0.271134	7.10725e-08	18.9738	4.382e-17	99.23	b1213	predicted inner membrane protein, SIRB family	COG3094	S	Uncharacterized protein conserved in bacteria	N	N	N
EC958_1482	ychA	1506088	1506879	+	791	47	576	0.0594185	0.170294	1.30783e-06	14.5802	2.52682e-35	100	b1214	conserved protein	COG2912	S	Uncharacterized conserved protein	N	N	N
EC958_1483	kdsA	1506933	1507769	+	836	1	6	0.00119617	4.94805e-08	0.761305	-19.9025	2.71848e-37	100	b1215	3-deoxy-D-manno-octulosonate 8-phosphate synthase	COG2877	M	3-deoxy-D-manno-octulosonic acid (KDO) 8-phosphate synthase	Y	Y	Y
EC958_1484	ldrC	1507936	1508052	-	116	9	66	0.0775862	0.316704	2.07794e-08	20.7802	8.43906e-06	94.29	b4423	toxic polypeptide, small	NA	NA	NA	N	N	N
EC958_1485	chaA	1508448	1509530	-	1082	129	1570	0.119224	0.647917	1.56607e-12	34.1186	4.72683e-48	99.45	b1216	calcium/sodium:proton antiporter	COG0387	P	Ca2+/H+ antiporter	N	N	N
EC958_1486	chaB	1509818	1510039	+	221	21	181	0.0950226	0.465079	3.90058e-10	26.4752	2.15633e-10	98.68	b1217	cation transport regulator	COG4572	R	Putative cation transport regulator	N	N	N
EC958_1487	chaC	1510206	1510883	+	677	37	504	0.0546529	0.136877	3.87638e-06	12.8886	2.44795e-30	99.13	b1218	cation transport regulator	COG3703	P	Uncharacterized protein involved in cation transport	N	N	N
EC958_1488	ychN	1510945	1511280	-	335	10	103	0.0298507	0.02151	0.0011073	3.272	2.2258e-15	99.15	b1219	conserved protein	COG1553	P	Uncharacterized conserved protein involved in intracellular sulfur reduction	N	N	N
EC958_1489	ychO	1511483	1512859	+	1376	87	907	0.0632267	0.198893	5.48867e-07	15.9095	6.53656e-61	97.63	b1220	predicted invasin	NA	NA	NA	N	N	N
EC958_1490	narL	1512878	1513510	-	632	33	325	0.0522152	0.12096	6.75771e-06	12.0096	2.27536e-28	100	b1221	DNA-binding response regulator in two-component regulatory system with NarX (or NarQ)	COG2197	TK	Response regulator containing a CheY-like receiver domain and an HTH DNA-binding domain	N	N	N
EC958_1491	narX	1513521	1515299	-	1778	112	1194	0.0629921	0.197088	5.79026e-07	15.8281	1.70739e-78	99.33	b1222	sensory histidine kinase in two-component regulatory system with NarL	COG3850	T	Signal transduction histidine kinase, nitrate/nitrite-specific	N	N	N
EC958_1492	1492	1515343	1515543	+	200	13	157	0.065	0.212695	3.6634e-07	16.5224	1.78744e-09	26.92	b2273	-	NA	NA	NA	N	N	N
EC958_1493	narK	1515656	1517029	+	1373	105	1282	0.0764749	0.307237	2.67716e-08	20.41	8.84231e-61	100	b1223	nitrate/nitrite transporter	COG2223	P	Nitrate/nitrite transporter	N	N	N
EC958_1494	narG	1517440	1521165	+	3725	296	3504	0.0794631	0.33275	1.35454e-08	21.4032	1.1825e-163	99.68	b1224	nitrate reductase 1, alpha subunit	COG5013	C	Nitrate reductase alpha subunit	N	N	N
EC958_1495	narH	1521180	1522700	+	1520	115	1340	0.0756579	0.300299	3.2253e-08	20.1372	3.28818e-67	99.8	b1225	nitrate reductase 1, beta (Fe-S) subunit	COG1140	C	Nitrate reductase beta subunit	N	N	N
EC958_1496	narJ	1522715	1523407	+	692	43	710	0.0621387	0.190569	7.03395e-07	15.5316	5.40405e-31	100	b1226	molybdenum-cofactor-assembly chaperone subunit (delta subunit) of nitrate reductase 1	COG2180	C	Nitrate reductase delta subunit	N	N	N
EC958_1497	narI	1523425	1524084	+	659	69	1044	0.104704	0.542965	4.29039e-11	29.5629	1.50003e-29	99.56	b1227	nitrate reductase 1, gamma (cytochrome b(NR)) subunit	COG2181	C	Nitrate reductase gamma subunit	N	N	N
EC958_1498	1498	1524230	1525219	+	989	58	698	0.0586451	0.164681	1.56001e-06	14.3079	5.52437e-44	28.16	b1091	-	COG0332	I	3-oxoacyl-[acyl-carrier-protein] synthase III	N	N	N
EC958_1499	1499	1525375	1526232	+	857	64	837	0.0746791	0.292015	4.03168e-08	19.8097	3.27952e-38	41.44	b0868	-	COG0451	MG	Nucleoside-diphosphate-sugar epimerases	N	N	N
EC958_1500	1500	1526228	1527016	+	788	54	572	0.0685279	0.240927	1.63893e-07	17.7314	3.41814e-35	27.01	b2268	-	COG0491	R	Zn-dependent hydrolases, including glyoxylases	N	N	N
EC958_1501	1501	1527031	1528299	+	1268	93	828	0.0733438	0.280769	5.46638e-08	19.3615	3.46055e-56	29.73	b1145	-	COG1541	H	Coenzyme F390 synthetase	N	N	N
EC958_1502	1502	1528314	1528898	+	584	49	394	0.0839041	0.370855	4.92099e-09	22.8668	2.86098e-26	23.03	b1411	-	NA	NA	NA	N	N	N
EC958_1503	1503	1528909	1530015	+	1106	87	1220	0.0786618	0.325892	1.62602e-08	21.1376	4.21539e-49	28.38	b0906	-	COG3000	I	Sterol desaturase	N	N	N
EC958_1504	1504	1530020	1531093	+	1073	45	399	0.0419385	0.0641959	7.03671e-05	8.17553	1.17009e-47	27.69	b3104	-	COG3239	I	Fatty acid desaturase	N	N	N
EC958_1505	purU	1531372	1532196	-	824	62	683	0.0752427	0.296781	3.54551e-08	19.9984	9.10315e-37	99.29	b1232	formyltetrahydrofolate hydrolase	COG0788	F	Formyltetrahydrofolate hydrolase	N	N	N
EC958_1506	ychJ	1532264	1532605	-	341	33	363	0.0967742	0.479541	2.61634e-10	27.0372	1.21634e-15	96.64	b1233	conserved protein, UPF0225 family	COG3012	S	Uncharacterized protein conserved in bacteria	N	N	N
EC958_1507	rssA	1532835	1533722	+	887	76	888	0.0856821	0.386101	3.28098e-09	23.449	1.59825e-39	99.67	b1234	conserved protein, patatin-like family	COG1752	R	Predicted esterase of the alpha-beta hydrolase superfamily	N	N	N
EC958_1508	rssB	1533832	1534827	+	995	113	1099	0.113568	0.608955	5.68636e-12	32.3535	3.0189e-44	99.7	b1235	response regulator binding RpoS to initiate proteolysis by ClpXP	COG2204	T	Response regulator containing CheY-like receiver, AAA-type ATPase, and DNA-binding domains	N	N	N
EC958_1509	galU	1535047	1535937	+	890	15	41	0.0168539	0.00274645	0.0214374	-2.98744	1.18148e-39	100	b1236	glucose-1-phosphate uridylyltransferase	COG1210	M	UDP-glucose pyrophosphorylase	N	N	N
EC958_1510	hns	1536100	1536495	-	395	17	331	0.043038	0.0694047	5.47648e-05	8.59738	5.28635e-18	100	b1237	global DNA-binding transcriptional dual regulator H-NS	COG2916	R	DNA-binding protein H-NS	N	N	N
EC958_1511	1511	1536605	1536715	-	110	11	80	0.1	0.505776	1.25396e-10	28.0682	1.54428e-05	43.33	b3884	-	NA	NA	NA	N	N	N
EC958_1512	tdk	1537117	1537716	+	599	109	1455	0.18197	0.912105	9.59072e-19	53.1433	6.31585e-27	98.54	b1238	thymidine kinase/deoxyuridine kinase	COG1435	F	Thymidine kinase	N	N	N
EC958_1513	insG	1537862	1539049	-	1187	80	954	0.0673968	0.231774	2.12109e-07	17.3452	1.20779e-52	96.38	b4278	IS4 transposase	COG3385	L	FOG: Transposase and inactivated derivatives	N	N	N
EC958_1514	adhE	1539192	1541849	-	2657	176	1921	0.0662401	0.22251	2.76116e-07	16.9489	6.10786e-117	99.89	b1241	fused acetaldehyde-CoA dehydrogenase/iron-dependent alcohol dehydrogenase/pyruvate-formate lyase deactivase	COG1454	C	Alcohol dehydrogenase, class IV	N	N	N
EC958_1515	ychE	1542344	1542973	+	629	76	1030	0.120827	0.658487	1.08663e-12	34.6169	3.07799e-28	99.53	b1242	predicted inner membrane protein	COG2095	U	Multiple antibiotic transporter	N	N	N
EC958_1516	1516	1543149	1543292	-	143	13	182	0.0909091	0.430617	9.96413e-10	25.1487	5.56346e-07	50	b0438	-	NA	NA	NA	N	N	N
EC958_1517	oppA	1543684	1545342	+	1658	191	2211	0.115199	0.620455	3.92029e-12	32.8637	3.02688e-73	99.26	b1243	oligopeptide transporter subunit	COG4166	E	ABC-type oligopeptide transport system, periplasmic component	N	N	N
EC958_1518	oppB	1545446	1546348	+	902	172	2233	0.190687	0.929343	1.31425e-19	55.7292	3.52827e-40	100	b1244	oligopeptide transporter subunit	COG0601	EP	ABC-type dipeptide/oligopeptide/nickel transport systems, permease components	N	N	N
EC958_1519	oppC	1546381	1547271	+	890	66	711	0.0741573	0.287612	4.54103e-08	19.6347	1.18148e-39	99.67	b1245	oligopeptide transporter subunit	COG1173	EP	ABC-type dipeptide/oligopeptide/nickel transport systems, permease components	N	N	N
EC958_1520	oppD	1547301	1548296	+	995	63	649	0.0633166	0.199585	5.37739e-07	15.9407	3.0189e-44	99.41	b1246	oligopeptide transporter subunit	COG0444	EP	ABC-type dipeptide/oligopeptide/nickel transport system, ATPase component	N	N	N
EC958_1521	oppF	1548311	1549336	+	1025	59	631	0.057561	0.156931	1.99745e-06	13.9248	1.47124e-45	95.97	b1247	oligopeptide transporter subunit	COG4608	E	ABC-type oligopeptide transport system, ATPase component	N	N	N
EC958_1522	yciU	1549407	1549718	-	311	16	226	0.0514469	0.116123	8.05136e-06	11.7305	2.49585e-14	100	b1248	conserved protein, UPF0263 family	COG3099	S	Uncharacterized protein conserved in bacteria	N	N	N
EC958_1523	cls	1549771	1551213	-	1442	106	1229	0.073509	0.282156	5.26436e-08	19.417	8.48371e-64	100	b1249	cardiolipin synthase 1	COG1502	I	Phosphatidylserine/phosphatidylglycerophosphate/cardiolipin synthases and related enzymes	N	N	N
EC958_1524	yciY	1551395	1551529	+	134	12	149	0.0895522	0.419123	1.35766e-09	24.7091	1.37719e-06	100	b4595	hypothetical protein	NA	NA	NA	N	N	N
EC958_1525	kch	1551602	1552792	-	1190	144	1297	0.121008	0.659672	1.04254e-12	34.6733	8.92842e-53	99.5	b1250	voltage-gated potassium channel	COG0569	P	K+ transport systems, NAD-binding component	N	N	N
EC958_1526	yciI	1553155	1553433	-	278	29	424	0.104317	0.539954	4.68674e-11	29.4401	6.92789e-13	98.98	b1251	predicted enzyme	COG2350	S	Uncharacterized protein conserved in bacteria	N	N	N
EC958_1527	tonB	1553660	1554373	+	713	28	149	0.0392707	0.0524692	0.000129279	7.13792	6.51934e-32	98.74	b1252	membrane spanning protein in TonB-ExbB-ExbD transport complex	COG0810	M	Periplasmic protein TonB, links inner and outer membranes	N	N	N
EC958_1528	yciA	1554431	1554757	-	326	27	174	0.0828221	0.361567	6.29784e-09	22.5115	5.50981e-15	100	b1253	Acyl-CoA esterase, role unknown	COG1607	I	Acyl-CoA hydrolase	N	N	N
EC958_1529	yciB	1554934	1555431	-	497	43	416	0.0865191	0.393267	2.71096e-09	23.7223	1.82723e-22	99.42	b1254	predicted inner membrane protein	COG2917	D	Intracellular septation protein A	N	N	N
EC958_1530	yciC	1555506	1556231	-	725	79	881	0.108966	0.575403	1.62384e-11	30.9085	1.94687e-32	99.6	b1255	inner membrane protein, UPF0259 family	NA	NA	NA	N	N	N
EC958_1531	ompW	1556605	1557225	+	620	69	761	0.11129	0.592551	9.55757e-12	31.6394	7.61932e-28	89.15	b1256	outer membrane protein W	COG3047	M	Outer membrane protein W	N	N	N
EC958_1532	1532	1557289	1558401	-	1112	78	783	0.0701439	0.254151	1.13384e-07	18.2808	2.30359e-49	49.6	b1140	-	COG0582	L	Integrase	N	N	N
EC958_1533	1533	1558710	1560191	-	1481	59	426	0.0398379	0.0548537	0.000113595	7.3603	1.67021e-65	47.19	b1350	-	NA	NA	NA	N	N	N
EC958_1534	1534	1560267	1560485	-	218	8	165	0.0366972	0.0423973	0.000232457	6.11604	2.91697e-10	28.77	b4016	-	NA	NA	NA	N	N	N
EC958_1535	ydaV	1560376	1561023	+	647	39	584	0.0602782	0.176616	1.07504e-06	14.8819	5.02305e-29	82.35	b1360	Rac prophage; predicted DNA replication protein	COG1484	L	DNA replication protein	N	N	N
EC958_1536	1536	1561063	1561815	+	752	36	382	0.0478723	0.0948262	1.81893e-05	10.4171	1.28348e-33	28.57	b0817	-	NA	NA	NA	N	N	N
EC958_1537	1537	1561849	1562256	+	407	45	730	0.110565	0.587245	1.1276e-11	31.4116	1.57867e-18	36.17	b0425	-	NA	NA	NA	N	N	N
EC958_1538	1538	1562548	1563096	+	548	50	589	0.0912409	0.433419	9.23819e-10	25.2561	1.07427e-24	27.03	b3132	-	COG1636	S	Uncharacterized protein conserved in bacteria	N	N	N
EC958_1539	hokD	1563352	1563489	+	137	16	120	0.116788	0.631456	2.72867e-12	33.3599	1.01807e-06	98.04	b1562	Qin prophage; small toxic polypeptide	NA	NA	NA	N	N	N
EC958_1540	1540	1563549	1563710	-	161	13	89	0.0807453	0.343741	1.01117e-08	21.8272	9.07917e-08	24.44	b3291	-	NA	NA	NA	N	N	N
EC958_1541	ydfU	1563949	1564986	+	1037	45	562	0.0433944	0.0711398	5.04904e-05	8.73345	4.39357e-46	78.74	b1560	Qin prophage; predicted protein	NA	NA	NA	N	N	N
EC958_1542	1542	1565005	1565367	+	362	18	170	0.0497238	0.105604	1.1926e-05	11.1004	1.46736e-16	44.35	b0550	-	COG4570	L	Holliday junction resolvase	N	N	N
EC958_1543	1543	1565382	1566005	+	623	63	654	0.101124	0.514781	9.70573e-11	28.4261	5.63248e-28	34.69	b1559	-	COG0484	O	DnaJ-class molecular chaperone with C-terminal Zn finger domain	N	N	N
EC958_1544	1544	1566250	1566429	+	179	11	93	0.0614525	0.185381	8.22519e-07	15.2925	1.48165e-08	33.33	b3150	-	NA	NA	NA	N	N	N
EC958_1545	1545	1566599	1567630	+	1031	56	516	0.0543162	0.134629	4.18566e-06	12.7678	8.03991e-46	24.93	b3262	-	COG0863	L	DNA modification methylase	N	N	N
EC958_1546	1546	1567946	1569091	+	1145	135	1063	0.117904	0.639057	2.11586e-12	33.7077	8.29894e-51	58.31	b4309	-	NA	NA	NA	N	N	N
EC958_1547	1547	1569112	1569228	+	116	6	48	0.0517241	0.117858	7.55827e-06	11.8313	8.43906e-06	30.77	b2411	-	NA	NA	NA	N	N	N
EC958_1548	1548	1569212	1569346	-	134	7	65	0.0522388	0.12111	6.72143e-06	12.0182	1.37719e-06	36.67	b3569	-	NA	NA	NA	N	N	N
EC958_1549	arrQ	1569590	1570105	+	515	37	205	0.0718447	0.268234	7.69388e-08	18.8564	2.98191e-23	88.7	b1554	Qin prophage; predicted lysozyme	COG3772	R	Phage-related lysozyme (muraminidase)	N	N	N
EC958_1550	1550	1570279	1570395	+	116	10	183	0.0862069	0.390595	2.91097e-09	23.6204	8.43906e-06	35.14	b0198	-	NA	NA	NA	N	N	N
EC958_1551	1551	1570544	1570648	+	104	18	204	0.173077	0.890773	7.28473e-18	50.494	2.82592e-05	40	b1600	-	NA	NA	NA	N	N	N
EC958_1552	rzpD	1570721	1571242	+	521	69	1051	0.132438	0.728609	7.69843e-14	38.202	1.62953e-23	69.68	b0556	DLP12 prophage; predicted murein endopeptidase	NA	NA	NA	N	N	N
EC958_1553	ynfO	1571671	1571853	-	182	14	127	0.0769231	0.311051	2.4171e-08	20.5594	1.09529e-08	75.76	b4533	hypothetical protein, Qin prophage	NA	NA	NA	N	N	N
EC958_1554	1554	1571913	1572260	+	347	31	420	0.0893372	0.417297	1.42589e-09	24.6393	6.64693e-16	27.73	b1159	-	COG1403	V	Restriction endonuclease	N	N	N
EC958_1555	1555	1572569	1573114	+	545	28	250	0.0513761	0.115682	8.18238e-06	11.7047	1.45321e-24	28.74	b3193	-	COG3728	L	Phage terminase, small subunit	N	N	N
EC958_1556	1556	1573129	1574772	+	1643	166	2207	0.101035	0.514071	9.90446e-11	28.3978	1.37113e-72	30.69	b0091	-	COG4626	R	Phage terminase-like protein, large subunit	N	N	N
EC958_1557	1557	1574854	1574973	+	119	7	30	0.0588235	0.16597	1.49782e-06	14.3708	6.23846e-06	23.91	b1850	-	NA	NA	NA	N	N	N
EC958_1558	1558	1575052	1576776	+	1724	143	1984	0.0829466	0.362636	6.12152e-09	22.5525	3.92854e-76	28.8	b2506	-	COG3740	R	Phage head maturation protease	N	N	N
EC958_1559	1559	1576899	1577042	+	143	16	205	0.111888	0.596895	8.33981e-12	31.827	5.56346e-07	35.71	b3200	-	NA	NA	NA	N	N	N
EC958_1560	1560	1577045	1577224	-	179	20	228	0.111732	0.595762	8.6423e-12	31.778	1.48165e-08	40.91	b2118	-	NA	NA	NA	N	N	N
EC958_1561	1561	1577210	1579573	+	2363	212	2706	0.0897165	0.420517	1.30777e-09	24.7624	4.41682e-104	20.91	b0633	-	COG4695	S	Phage-related protein	N	N	N
EC958_1562	1562	1579588	1579896	+	308	31	498	0.100649	0.510989	1.0814e-10	28.2751	3.37626e-14	34.43	b1141	-	NA	NA	NA	N	N	N
EC958_1563	1563	1579924	1580256	+	332	17	173	0.0512048	0.114618	8.50832e-06	11.6423	3.01095e-15	24.74	b4290	-	COG5614	R	Bacteriophage head-tail adaptor	N	N	N
EC958_1564	1564	1580271	1580699	+	428	35	439	0.0817757	0.352584	7.99469e-09	22.1671	1.90447e-19	26.76	b1939	-	NA	NA	NA	N	N	N
EC958_1565	1565	1580714	1581040	+	326	30	385	0.0920245	0.440023	7.72664e-10	25.5094	5.50981e-15	40.48	b3502	-	NA	NA	NA	N	N	N
EC958_1566	1566	1581125	1581823	+	698	54	618	0.0773639	0.314807	2.18598e-08	20.7062	2.95316e-31	30.65	b3433	-	NA	NA	NA	N	N	N
EC958_1567	1567	1581856	1582212	+	356	36	424	0.101124	0.514781	9.70573e-11	28.4261	2.68517e-16	30.59	b4167	-	NA	NA	NA	N	N	N
EC958_1568	1568	1582332	1582517	+	185	28	318	0.151351	0.819	1.03185e-15	43.9656	8.09681e-09	33.9	b0158	-	NA	NA	NA	N	N	N
EC958_1569	1569	1582583	1585807	+	3224	266	4040	0.0825062	0.358855	6.76814e-09	22.4076	9.68198e-142	21.04	b1372	-	COG5281	S	Phage-related minor tail protein	N	N	N
EC958_1570	1570	1585818	1586141	+	323	32	474	0.0990712	0.498279	1.54971e-10	27.7719	7.45338e-15	30.88	b1065	-	COG4718	S	Phage-related protein	N	N	N
EC958_1571	1571	1586159	1586839	+	680	57	810	0.0838235	0.370164	5.01224e-09	22.8404	1.80961e-30	23.93	b1819	-	COG4672	S	Phage-related protein	N	N	N
EC958_1572	1572	1586976	1587593	+	617	64	900	0.103728	0.535359	5.36013e-11	29.2535	1.0307e-27	41.67	b4407	-	COG1310	R	Predicted metal-dependent protease of the PAD1/JAB1 superfamily	N	N	N
EC958_1573	1573	1587608	1588171	+	563	49	719	0.0870337	0.397667	2.41082e-09	23.8902	2.37154e-25	25.71	b2828	-	COG4723	S	Phage-related protein, tail component	N	N	N
EC958_1574	1574	1588532	1591987	+	3455	319	3759	0.09233	0.442591	7.20691e-10	25.608	7.6259e-152	21.53	b0441	-	COG4733	S	Phage-related protein, tail component	N	N	N
EC958_1575	1575	1592073	1592435	+	362	34	351	0.0939227	0.455928	5.01239e-10	26.1214	1.46736e-16	33.33	b0814	-	COG3637	M	Opacity protein and related surface antigens	N	N	N
EC958_1576	1576	1592661	1593380	-	719	26	209	0.0361613	0.0404538	0.000262668	5.90038	3.56263e-32	30.69	b1372	-	NA	NA	NA	N	N	N
EC958_1577	1577	1593434	1593550	+	116	5	58	0.0431034	0.0697217	5.39534e-05	8.6224	8.43906e-06	29.41	b0185	-	NA	NA	NA	N	N	N
EC958_1578	stfR	1593529	1594008	+	479	32	557	0.0668058	0.227028	2.42703e-07	17.1429	1.11968e-21	79.55	b1372	Rac prophage; predicted tail fiber protein	COG5301	R	Phage-related tail fibre protein	N	N	N
EC958_1579	1579	1594134	1594367	+	233	26	202	0.111588	0.594718	8.93047e-12	31.7329	6.43946e-11	29.11	b1155	-	NA	NA	NA	N	N	N
EC958_1580	1580	1594416	1594925	-	509	66	716	0.129666	0.712903	1.44823e-13	37.3498	5.45667e-23	28.99	b1546	-	NA	NA	NA	N	N	N
EC958_1581	1581	1594959	1595957	-	998	199	3619	0.199399	0.943467	1.80342e-20	58.3032	2.23168e-44	30.3	b2933	-	NA	NA	NA	N	N	N
EC958_1582	pinE	1595981	1596151	+	170	7	46	0.0411765	0.0607139	8.37187e-05	7.88124	3.66772e-08	75	b1158	e14 prophage; site-specific DNA recombinase	COG1961	L	Site-specific recombinases, DNA invertase Pin homologs	N	N	N
EC958_1583	1583	1596368	1596781	-	413	59	760	0.142857	0.781936	7.15633e-15	41.3876	8.62695e-19	31.75	b2345	-	NA	NA	NA	N	N	N
EC958_1584	tfaR	1597093	1597344	+	251	28	250	0.111554	0.594469	9.00037e-12	31.7221	1.05087e-11	83.64	b1373	Rac prophage; predicted tail fiber assembly protein	COG5525	R	Bacteriophage tail assembly protein	N	N	N
EC958_1585	1585	1597477	1597629	+	152	10	204	0.0657895	0.218929	3.05994e-07	16.7941	2.24748e-07	34.09	b1650	-	NA	NA	NA	N	N	N
EC958_1586	1586	1597774	1598061	-	287	14	153	0.0487805	0.100043	1.47875e-05	10.7531	2.79867e-13	29.09	b0567	-	COG3646	S	Uncharacterized phage-encoded protein	N	N	N
EC958_1587	1587	1598328	1598579	-	251	22	147	0.0876494	0.402924	2.0951e-09	24.0907	1.05087e-11	34.09	b4142	-	NA	NA	NA	N	N	N
EC958_1588	ompW	1598806	1598910	+	104	8	73	0.0769231	0.311051	2.4171e-08	20.5594	2.82592e-05	65	b1256	outer membrane protein W	COG3047	M	Outer membrane protein W	N	N	N
EC958_1589	trpA	1598979	1599767	-	788	62	767	0.0786802	0.326049	1.61923e-08	21.1436	3.41814e-35	98.88	b1260	tryptophan synthase, alpha subunit	COG0159	E	Tryptophan synthase alpha chain	N	N	N
EC958_1590	trpB	1599785	1600801	-	1016	57	672	0.0561024	0.146734	2.7855e-06	13.4067	3.64195e-45	85.11	b1261	tryptophan synthase, beta subunit	COG0133	E	Tryptophan synthase beta chain	N	N	N
EC958_1591	trpC	1600831	1602171	-	1340	94	916	0.0701493	0.254195	1.13245e-07	18.2827	2.45441e-59	98.01	b1262	fused indole-3-glycerolphosphate synthetase/N-(5-phosphoribosyl)anthranilate isomerase	COG0134	E	Indole-3-glycerol phosphate synthase	N	N	N
EC958_1592	trpD	1602193	1603770	-	1577	98	1359	0.0621433	0.190604	7.0266e-07	15.5332	1.05643e-69	99.44	b1263	fused glutamine amidotransferase (component II) of anthranilate synthase/anthranilate phosphoribosyl transferase	COG0547	E	Anthranilate phosphoribosyltransferase	N	N	N
EC958_1593	trpE	1603788	1605332	-	1544	96	1116	0.0621762	0.190854	6.97417e-07	15.5446	2.9324e-68	99.42	b1264	component I of anthranilate synthase	COG0147	EH	Anthranilate/para-aminobenzoate synthases component I	N	N	N
EC958_1594	yciV	1605624	1606487	+	863	61	772	0.0706837	0.258604	1.00255e-07	18.4638	1.79216e-38	98.63	b1266	conserved protein	COG0613	R	Predicted metal-dependent phosphoesterases (PHP family)	N	N	N
EC958_1595	yciO	1606502	1607104	+	602	50	988	0.0830565	0.363579	5.97012e-09	22.5886	4.66891e-27	100	b1267	predicted RNA binding protein	COG0009	J	Putative translation factor (SUA5)	N	N	N
EC958_1596	yciQ	1607150	1609027	+	1877	327	4978	0.174214	0.893733	5.62091e-18	50.8334	7.9834e-83	94.14	b1268	predicted inner membrane protein	NA	NA	NA	N	N	N
EC958_1597	rluB	1609258	1610115	+	857	82	1749	0.0956826	0.470545	3.35567e-10	26.6871	3.27952e-38	99.66	b1269	23S rRNA pseudouridylate synthase	COG1187	J	16S rRNA uridine-516 pseudouridylate synthase and related pseudouridylate synthases	N	N	N
EC958_1598	1598	1610303	1611307	+	1004	15	65	0.0149402	0.00173465	0.0331635	-4.08328	1.21955e-44	22.73	b3896	-	NA	NA	NA	Y	N	N
EC958_1599	1599	1611452	1611625	+	173	17	91	0.0982659	0.491741	1.86204e-10	27.5146	2.71131e-08	32.56	b2901	-	NA	NA	NA	N	N	N
EC958_1600	btuR	1611700	1612272	-	572	62	680	0.108392	0.571109	1.85085e-11	30.7277	9.58034e-26	98.47	b1270	cob(I)alamin adenolsyltransferase/cobinamide ATP-dependent adenolsyltransferase	COG2109	H	ATP:corrinoid adenosyltransferase	N	N	N
EC958_1601	yciK	1612287	1613027	-	740	60	548	0.0810811	0.346622	9.36658e-09	21.9381	4.29788e-33	99.21	b1271	predicted oxoacyl-(acyl carrier protein) reductase, EmrKY-TolC system	COG1028	IQR	Dehydrogenases with different specificities (related to short-chain alcohol dehydrogenases)	N	N	N
EC958_1602	sohB	1613265	1614296	+	1031	65	744	0.0630456	0.197499	5.72011e-07	15.8467	8.03991e-46	99.14	b1272	predicted inner membrane peptidase; multicopy suppressor of htrA(degP)	COG0616	OU	Periplasmic serine proteases (ClpP class)	N	N	N
EC958_1603	yciN	1614350	1614583	-	233	20	309	0.0858369	0.387427	3.16718e-09	23.4996	6.43946e-11	98.8	b1273	predicted protein	NA	NA	NA	N	N	N
EC958_1604	topA	1614939	1617560	+	2621	22	103	0.00839374	0.000177349	0.147528	-8.61891	2.29344e-115	99.77	b1274	DNA topoisomerase I, omega subunit	COG0550	L	Topoisomerase IA	Y	Y	Y
EC958_1605	cysB	1617788	1618744	+	956	13	74	0.0135983	0.0012059	0.0450331	-4.89767	1.53343e-42	100	b1275	DNA-binding transcriptional dual regulator, O-acetyl-L-serine-binding	COG0583	K	Transcriptional regulator	Y	N	N
EC958_1606	ymiA	1619093	1619203	+	110	6	25	0.0545455	0.136158	3.9725e-06	12.8501	1.54428e-05	95.24	b4522	hypothetical protein	NA	NA	NA	N	N	N
EC958_1607	yciX	1619224	1619373	+	149	20	98	0.134228	0.738412	5.11806e-14	38.7514	3.04027e-07	96.36	b4523	hypothetical protein	NA	NA	NA	N	N	N
EC958_1608	acnA	1619750	1622407	+	2657	161	1776	0.0605947	0.178963	1.0002e-06	14.9927	6.10786e-117	98.65	b1276	aconitate hydratase 1	COG1048	C	Aconitase A	N	N	N
EC958_1609	ribA	1622489	1623061	-	572	3	17	0.00524476	2.57471e-05	0.302468	-11.7248	9.58034e-26	99.49	b1277	GTP cyclohydrolase II	COG0807	H	GTP cyclohydrolase II	Y	Y	Y
EC958_1610	pgpB	1623249	1623995	+	746	32	327	0.0428954	0.0687172	5.65737e-05	8.54287	2.34867e-33	98.82	b1278	phosphatidylglycerophosphatase B	COG0671	I	Membrane-associated phospholipid phosphatase	N	N	N
EC958_1611	yciS	1624162	1624452	+	290	16	69	0.0551724	0.140378	3.44337e-06	13.0747	2.06888e-13	98.04	b1279	conserved inner membrane protein	COG3771	S	Predicted membrane protein	N	N	N
EC958_1612	yciM	1624477	1625628	+	1151	14	33	0.0121633	0.000779971	0.0624627	-5.82067	4.53513e-51	99.49	b1280	TPR-repeats-containing protein	COG2956	G	Predicted N-acetylglucosaminyl transferase	Y	N	N
EC958_1614	pyrF	1625838	1626557	+	719	25	164	0.0347705	0.035657	0.00036068	5.33569	3.56263e-32	96.73	b1281	orotidine-5'-phosphate decarboxylase	COG0284	F	Orotidine-5'-phosphate decarboxylase	N	N	N
EC958_1615	yciH	1626572	1626883	+	311	31	217	0.0996785	0.503186	1.34934e-10	27.9657	2.49585e-14	98.15	b1282	initiation factor function partial mimic, SUI1 family	COG0023	J	Translation initiation factor 1 (eIF-1/SUI1) and related proteins	N	N	N
EC958_1616	osmB	1627027	1627227	-	200	36	261	0.18	0.907727	1.50283e-18	52.5574	1.78744e-09	100	b1283	lipoprotein	NA	NA	NA	N	N	N
EC958_1617	yciT	1627514	1628245	-	731	61	572	0.0834473	0.366935	5.46112e-09	22.7169	1.06391e-32	99.2	b1284	global regulator of transcription; DeoR family	COG1349	KG	Transcriptional regulators of sugar metabolism	N	N	N
EC958_1618	yciZ	1628352	1628507	-	155	17	221	0.109677	0.580697	1.38055e-11	31.1325	1.66142e-07	100	b4596	hypothetical protein	NA	NA	NA	N	N	N
EC958_1619	gmr	1628673	1630640	-	1967	122	1005	0.0620234	0.189694	7.22138e-07	15.4915	9.24043e-87	98.64	b1285	cyclic-di-GMP phosphodiesterase; csgD regulator; modulator of Rnase II stability	COG5001	T	Predicted signal transduction protein containing a membrane domain, an EAL and a GGDEF domain	N	N	N
EC958_1620	rnb	1630892	1632808	-	1916	87	747	0.0454071	0.0813584	3.19093e-05	9.49592	1.57171e-84	99.53	b1286	ribonuclease II	COG4776	K	Exoribonuclease II	N	N	N
EC958_1621	yciW	1632894	1634003	-	1109	72	878	0.0649234	0.212093	3.72798e-07	16.496	3.11617e-49	95.2	b1287	predicted oxidoreductase	COG4950	S	Uncharacterized protein conserved in bacteria	N	N	N
EC958_1622	fabI	1634166	1634936	-	770	0	0	0	0	1	-173.929	2.09454e-34	99.62	b1288	enoyl-[acyl-carrier-protein] reductase, NADH-dependent	COG0623	I	Enoyl-[acyl-carrier-protein] reductase (NADH)	Y	Y	Y
EC958_1623	1623	1635432	1635980	+	548	89	2077	0.162409	0.85935	8.29363e-17	47.299	1.07427e-24	30.89	b1618	-	COG1309	K	Transcriptional regulator	N	N	N
EC958_1624	1624	1636147	1637250	+	1103	145	1840	0.13146	0.723141	9.62138e-14	37.9016	5.70235e-49	51.66	b0463	-	COG0845	M	Membrane-fusion protein	N	N	N
EC958_1625	1625	1637268	1640357	+	3089	199	1931	0.0644221	0.208166	4.17928e-07	16.3231	7.77514e-136	57.12	b0462	-	COG0841	V	Cation/multidrug efflux pump	N	N	N
EC958_1626	1626	1640379	1641734	+	1355	77	718	0.0568266	0.151763	2.36153e-06	13.6643	5.41833e-60	36.84	b0572	-	COG1538	MU	Outer membrane protein	N	N	N
EC958_1627	1627	1641761	1642906	+	1145	81	632	0.0707424	0.259089	9.89218e-08	18.4837	8.29894e-51	31.61	b2182	-	COG2814	G	Arabinose efflux permease	N	N	N
EC958_1628	sapF	1642972	1643760	-	788	35	359	0.0444162	0.0762389	3.99972e-05	9.12178	3.41814e-35	100	b1290	antimicrobial peptide transport ABC system ATP-binding protein	COG4167	V	ABC-type antimicrobial peptide transport system, ATPase component	N	N	N
EC958_1629	sapD	1643780	1644754	-	974	63	468	0.0646817	0.210197	3.93912e-07	16.4127	2.50245e-43	100	b1291	antimicrobial peptide transport ABC system ATP-binding protein	COG4170	V	ABC-type antimicrobial peptide transport system, ATPase component	N	N	N
EC958_1630	sapC	1644772	1645644	-	872	75	569	0.0860092	0.388903	3.0452e-09	23.5558	7.23981e-39	100	b1292	antimicrobial peptide transport ABC transporter permease	COG4171	V	ABC-type antimicrobial peptide transport system, permease component	N	N	N
EC958_1631	sapB	1645649	1646596	-	947	66	479	0.0696938	0.250451	1.25638e-07	18.1281	3.79589e-42	99.38	b1293	antimicrobial peptide transport ABC transporter permease	COG4168	V	ABC-type antimicrobial peptide transport system, permease component	N	N	N
EC958_1632	sapA	1646611	1648236	-	1625	116	1121	0.0713846	0.26441	8.54472e-08	18.701	8.40189e-72	99.45	b1294	antimicrobial peptide transport ABC transporter periplasmic binding protein	COG4166	E	ABC-type oligopeptide transport system, periplasmic component	N	N	N
EC958_1633	ymjA	1648567	1648794	-	227	36	397	0.15859	0.846369	1.98078e-16	46.1505	1.17837e-10	97.53	b1295	predicted protein	NA	NA	NA	N	N	N
EC958_1634	pspF	1649237	1650196	-	959	63	627	0.0656934	0.218168	3.12768e-07	16.7611	1.13357e-42	97.54	b1303	DNA-binding transcriptional activator	COG1221	KT	Transcriptional regulators containing an AAA-type ATPase domain and a DNA-binding domain	N	N	N
EC958_1635	pspA	1650381	1651031	+	650	28	355	0.0430769	0.0695932	5.42807e-05	8.61226	3.71322e-29	99.1	b1304	regulatory protein for phage-shock-protein operon	COG1842	KT	Phage shock protein A (IM30), suppresses sigma54-dependent transcription	N	N	N
EC958_1636	pspB	1651103	1651309	+	206	11	82	0.0533981	0.128577	5.16031e-06	12.4374	9.76783e-10	100	b1305	DNA-binding transcriptional regulator of psp operon	NA	NA	NA	N	N	N
EC958_1637	pspC	1651327	1651668	+	341	21	168	0.0615836	0.186368	7.98305e-07	15.3382	1.21634e-15	100	b1306	DNA-binding transcriptional activator	COG1983	KT	Putative stress-responsive transcriptional regulator	N	N	N
EC958_1638	pspD	1651695	1651898	+	203	12	116	0.0591133	0.168071	1.40207e-06	14.4728	1.32134e-09	100	b1307	peripheral inner membrane phage-shock protein	NA	NA	NA	N	N	N
EC958_1639	pspE	1651991	1652287	+	296	56	566	0.189189	0.926615	1.84936e-19	55.2855	1.13058e-13	99.04	b1308	thiosulfate:cyanide sulfurtransferase (rhodanese)	COG0607	P	Rhodanese-related sulfurtransferase	N	N	N
EC958_1640	ycjM	1652516	1654177	+	1661	136	736	0.0818784	0.353465	7.8097e-09	22.201	2.23758e-73	94.1	b1309	predicted glucosyltransferase	COG0366	G	Glycosidases	N	N	N
EC958_1641	ycjN	1654209	1655483	+	1274	119	1152	0.0934066	0.451617	5.63824e-10	25.9552	1.89109e-56	98.37	b1310	predicted sugar transporter subunit: periplasmic-binding component of ABC superfamily	COG1653	G	ABC-type sugar transport system, periplasmic component	N	N	N
EC958_1642	ycjO	1655522	1656385	+	863	60	801	0.0695249	0.249067	1.30569e-07	18.0707	1.79216e-38	100	b1311	predicted sugar transporter subunit: membrane component of ABC superfamily	COG1175	G	ABC-type sugar transport systems, permease components	N	N	N
EC958_1643	ycjP	1656390	1657214	+	824	67	958	0.0813107	0.348592	8.88888e-09	22.0138	9.10315e-37	98.93	b1312	predicted sugar transporter subunit: membrane component of ABC superfamily	COG0395	G	ABC-type sugar transport system, permease component	N	N	N
EC958_1644	ycjQ	1657263	1658297	+	1034	64	930	0.0618956	0.188725	7.43495e-07	15.4469	5.94339e-46	98.57	b1313	predicted oxidoreductase, Zn-dependent and NAD(P)-binding	COG1063	ER	Threonine dehydrogenase and related Zn-dependent dehydrogenases	N	N	N
EC958_1645	ycjR	1658333	1659103	+	770	58	773	0.0753247	0.297475	3.47988e-08	20.0258	2.09454e-34	98.85	b1314	predicted enzyme	COG1082	G	Sugar phosphate isomerases/epimerases	N	N	N
EC958_1646	ycjS	1659131	1660168	+	1037	69	667	0.0665381	0.224886	2.5798e-07	17.0512	4.39357e-46	98.01	b1315	predicted oxidoreductase, NADH-binding	COG0673	R	Predicted dehydrogenases and related proteins	N	N	N
EC958_1647	ycjT	1660183	1662432	+	2249	176	1943	0.078257	0.322431	1.78325e-08	21.0032	4.27896e-99	97.09	b1316	predicted hydrolase	COG1554	G	Trehalose and maltose hydrolases (possible phosphorylases)	N	N	N
EC958_1648	ycjU	1662447	1663088	+	641	25	243	0.0390016	0.0513587	0.00013746	7.03206	9.1918e-29	96.8	b1317	beta-phosphoglucomutase	COG0637	R	Predicted phosphatase/phosphohexomutase	N	N	N
EC958_1649	1649	1663120	1664184	+	1064	116	1597	0.109023	0.575829	1.60286e-11	30.9264	2.89647e-47	49.86	b3450	-	COG3839	G	ABC-type sugar transport systems, ATPase components	N	N	N
EC958_1650	ompG	1664247	1665134	+	887	176	1327	0.198422	0.942021	2.25347e-20	58.015	1.59825e-39	98.01	b1319	outer membrane porin G	NA	NA	NA	N	N	N
EC958_1651	ycjW	1665203	1666183	-	980	187	1796	0.190816	0.929573	1.27617e-19	55.7673	1.36751e-43	96.69	b1320	predicted DNA-binding transcriptional regulator	COG1609	K	Transcriptional regulators	N	N	N
EC958_1652	ycjX	1666357	1667736	+	1379	88	1027	0.0638144	0.203435	4.80046e-07	16.113	4.83207e-61	98.92	b1321	conserved protein with nucleoside triphosphate hydrolase domain	COG3106	R	Predicted ATPase	N	N	N
EC958_1653	ycjF	1667751	1668794	+	1043	78	1110	0.0747843	0.292903	3.93616e-08	19.8449	2.40096e-46	100	b1322	inner membrane protein, UPF0283 family	COG3768	S	Predicted membrane protein	N	N	N
EC958_1654	tyrR	1668960	1670483	+	1523	80	1143	0.0525279	0.122954	6.29268e-06	12.1229	2.43074e-67	99.61	b1323	DNA-binding transcriptional dual regulator, tyrosine-binding	COG3283	KE	Transcriptional regulator of aromatic amino acids metabolism	N	N	N
EC958_1655	tpx	1670545	1671033	-	488	22	262	0.045082	0.0796597	3.43646e-05	9.37341	4.52318e-22	100	b1324	lipid hydroperoxide peroxidase	COG2077	O	Peroxiredoxin	N	N	N
EC958_1656	ycjG	1671170	1672117	+	947	54	511	0.0570222	0.153133	2.25853e-06	13.7338	3.79589e-42	98.75	b1325	L-Ala-D/L-Glu epimerase	COG4948	MR	L-alanine-DL-glutamate epimerase and related enzymes of enolase superfamily	N	N	N
EC958_1657	mpaA	1672110	1672820	-	710	63	456	0.0887324	0.412154	1.6367e-09	24.4429	8.81902e-32	99.17	b1326	murein peptide amidase A	COG2866	E	Predicted carboxypeptidase	N	N	N
EC958_1658	1658	1673129	1673749	-	620	129	1746	0.208065	0.954918	2.50058e-21	60.8547	7.61932e-28	26.02	b4211	-	COG0451	MG	Nucleoside-diphosphate-sugar epimerases	N	N	N
EC958_1659	ycjY	1673838	1674863	-	1025	129	1330	0.125854	0.690241	3.45404e-13	36.174	1.47124e-45	86.01	b1327	predicted hydrolase	COG1073	R	Hydrolases of the alpha/beta superfamily	N	N	N
EC958_1660	ycjZ	1675007	1675888	+	881	112	919	0.127128	0.697955	2.58297e-13	36.5676	2.92468e-39	99	b1328	predicted DNA-binding transcriptional regulator	COG0583	K	Transcriptional regulator	N	N	N
EC958_1661	mppA	1676243	1677838	+	1595	157	1033	0.0984326	0.493097	1.7926e-10	27.5679	1.72402e-70	99.81	b1329	murein tripeptide (L-ala-gamma-D-glutamyl-meso-DAP) transporter subunit	COG4166	E	ABC-type oligopeptide transport system, periplasmic component	N	N	N
EC958_1662	ynaI	1677907	1678920	-	1013	114	633	0.112537	0.60158	7.19289e-12	32.0305	4.92663e-45	99.13	b1330	MscS family inner membrane protein	COG0668	M	Small-conductance mechanosensitive channel	N	N	N
EC958_1663	ynaJ	1679182	1679421	+	239	26	149	0.108787	0.574067	1.69145e-11	30.8521	3.51897e-11	100	b1332	predicted inner membrane protein, DUF2534 family	NA	NA	NA	N	N	N
EC958_1664	uspE	1679489	1680421	-	932	75	670	0.0804721	0.341398	1.07617e-08	21.737	1.71948e-41	100	b1333	stress-induced protein	COG0589	T	Universal stress protein UspA and related nucleotide-binding proteins	N	N	N
EC958_1665	fnr	1680591	1681325	-	734	21	139	0.0286104	0.0186173	0.00146921	2.73264	7.8648e-33	100	b1334	DNA-binding transcriptional dual regulator, global regulator of anaerobic growth	COG0664	T	cAMP-binding proteins - catabolite gene activator and regulatory subunit of cAMP-dependent protein kinases	N	N	N
EC958_1666	ogt	1681538	1682035	-	497	28	218	0.056338	0.148363	2.63978e-06	13.4906	1.82723e-22	100	b1335	O-6-alkylguanine-DNA:cysteine-protein methyltransferase	COG0350	L	Methylated DNA-protein cysteine methyltransferase	N	N	N
EC958_1667	abgT	1682064	1682249	-	185	17	316	0.0918919	0.438907	7.96389e-10	25.4665	8.09681e-09	100	b1336	p-aminobenzoyl-glutamate transporter; membrane protein	COG2978	H	Putative p-aminobenzoyl-glutamate transporter	N	N	N
EC958_1668	1668	1682596	1683393	-	797	89	761	0.111669	0.595304	8.7675e-12	31.7582	1.38083e-35	31.2	b1790	-	COG2207	K	AraC-type DNA-binding domain-containing proteins	N	N	N
EC958_1669	1669	1683508	1684518	+	1010	119	909	0.117822	0.638501	2.15586e-12	33.6821	6.66449e-45	31.09	b2368	-	COG1566	V	Multidrug resistance efflux pump	N	N	N
EC958_1670	1670	1684536	1686029	+	1493	97	656	0.0649699	0.212458	3.68866e-07	16.512	4.98775e-66	28.28	b2686	-	COG2814	G	Arabinose efflux permease	N	N	N
EC958_1671	ydaL	1686242	1686787	+	545	40	271	0.0733945	0.281195	5.40362e-08	19.3785	1.45321e-24	98.93	b1340	conserved protein	COG2840	S	Uncharacterized protein conserved in bacteria	N	N	N
EC958_1672	ydaM	1686826	1688040	-	1214	137	1561	0.11285	0.603828	6.69737e-12	32.1287	7.96237e-54	98.78	b1341	diguanylate cyclase, csgD regulator	COG2199	T	FOG: GGDEF domain	N	N	N
EC958_1673	ydaN	1688313	1689278	+	965	103	916	0.106736	0.558587	2.69978e-11	30.2053	6.19462e-43	99.69	b1342	predicted Zn(II) transporter	COG0598	P	Mg2+ and Co2+ transporters	N	N	N
EC958_1674	1674	1689571	1689726	+	155	11	179	0.0709677	0.260953	9.3967e-08	18.56	1.66142e-07	51.35	b4466	-	NA	NA	NA	N	N	N
EC958_1675	dbpA	1689774	1691129	+	1355	86	781	0.0634686	0.200759	5.19416e-07	15.9933	5.41833e-60	98.91	b1343	ATP-dependent RNA helicase, specific for 23S rRNA	COG0513	LKJ	Superfamily II DNA and RNA helicases	N	N	N
EC958_1676	ttcA	1691275	1692192	-	917	64	613	0.0697928	0.251264	1.22833e-07	18.1617	7.78896e-41	99.36	b1344	tRNA 2-thiocytidine biosynthesis protein	COG0037	D	Predicted ATPase of the PP-loop superfamily implicated in cell cycle control	N	N	N
EC958_1677	intR	1692262	1692474	-	212	20	182	0.0943396	0.459403	4.55783e-10	26.2556	5.33783e-10	98.68	b1345	Rac prophage; integrase	NA	NA	NA	N	N	N
EC958_1678	uspF	1694536	1694952	-	416	73	770	0.175481	0.896946	4.21106e-18	51.2113	6.37735e-19	99.31	b1376	stress-induced protein, ATP-binding protein	COG0589	T	Universal stress protein UspA and related nucleotide-binding proteins	N	N	N
EC958_1679	ompN	1695111	1696226	-	1115	75	475	0.0672646	0.230709	2.18601e-07	17.3	1.7029e-49	99.47	b1377	outer membrane pore protein N, non-specific	COG3203	M	Outer membrane protein (porin)	N	N	N
EC958_1680	ydbK	1696610	1700116	-	3506	206	1800	0.0587564	0.165484	1.52092e-06	14.3472	4.48342e-154	99.23	b1378	fused predicted pyruvate-flavodoxin oxidoreductase: conserved protein/conserved protein/FeS binding protein	COG0674	C	Pyruvate:ferredoxin oxidoreductase and related 2-oxoacid:ferredoxin oxidoreductases, alpha subunit	N	N	N
EC958_1681	ydbJ	1700408	1700656	+	248	17	175	0.0685484	0.241094	1.6313e-07	17.7384	1.42156e-11	98.86	b4529	predicted lipoprotein, DUF333 family	COG3042	R	Putative hemolysin	N	N	N
EC958_1682	hslJ	1700671	1701075	-	404	32	341	0.0792079	0.330565	1.43567e-08	21.3186	2.13553e-18	98.57	b1379	heat-inducible lipoprotein involved in novobiocin resistance	COG3187	O	Heat shock protein	N	N	N
EC958_1683	ldhA	1701204	1702175	-	971	66	523	0.0679712	0.23641	1.86075e-07	17.5415	3.38518e-43	99.7	b1380	fermentative D-lactate dehydrogenase, NAD-dependent	COG1052	CHR	Lactate dehydrogenase and related dehydrogenases	N	N	N
EC958_1684	ydbH	1702401	1705022	+	2621	254	2428	0.0969096	0.480653	2.53681e-10	27.0806	2.29344e-115	99.43	b1381	predicted protein	NA	NA	NA	N	N	N
EC958_1685	ynbE	1705037	1705204	+	167	32	250	0.191617	0.930988	1.06329e-19	56.0042	4.9615e-08	100	b1382	lipoprotein	NA	NA	NA	N	N	N
EC958_1686	ydbL	1705230	1705538	+	308	34	213	0.11039	0.585955	1.17364e-11	31.3565	3.37626e-14	97.22	b1383	conserved protein	COG3784	S	Uncharacterized protein conserved in bacteria	N	N	N
EC958_1687	feaR	1705728	1705943	-	215	11	39	0.0511628	0.114357	8.59024e-06	11.627	3.94592e-10	98.7	b1384	DNA-binding transcriptional activator for tynA and feaB	COG2207	K	AraC-type DNA-binding domain-containing proteins	N	N	N
EC958_1688	paaY	1706014	1706187	+	173	21	187	0.121387	0.662133	9.56258e-13	34.7909	2.71131e-08	88.14	b1400	predicted hexapeptide repeat acetyltransferase	COG0663	R	Carbonic anhydrases/acetyltransferases, isoleucine patch superfamily	N	N	N
EC958_1689	1689	1706634	1713860	+	7226	1256	16646	0.173817	0.892707	6.15397e-18	50.7148	8.77216666804702e-317	25.13	b2000	-	NA	NA	NA	N	N	N
EC958_1690	ydbC	1714098	1714946	+	848	81	946	0.0955189	0.469191	3.48331e-10	26.6346	8.1182e-38	94.06	b1406	predicted oxidoreductase, NAD(P)-binding	COG0667	C	Predicted oxidoreductases (related to aryl-alcohol dehydrogenases)	N	N	N
EC958_1691	azoR	1715004	1715591	-	587	49	633	0.0834753	0.367175	5.42641e-09	22.7261	2.11494e-26	98.51	b1412	NADH-azoreductase, FMN-dependent	COG1182	I	Acyl carrier protein phosphodiesterase	N	N	N
EC958_1692	hrpA	1715810	1719694	+	3884	143	855	0.0368177	0.0428414	0.000226159	6.16438	1.31319e-170	99.23	b1413	predicted ATP-dependent helicase	COG1643	L	HrpA-like helicases	N	N	N
EC958_1693	ydcF	1719985	1720767	+	782	92	801	0.117647	0.637316	2.24348e-12	33.6277	6.25494e-35	98.12	b1414	conserved SAM-binding protein, DUF218 superfamily	COG1434	S	Uncharacterized conserved protein	N	N	N
EC958_1694	1694	1720824	1720931	+	107	6	54	0.0560748	0.146544	2.80308e-06	13.3969	2.08902e-05	44	b3335	-	NA	NA	NA	N	N	N
EC958_1695	aldA	1720995	1722416	+	1421	130	1622	0.0914849	0.435477	8.73831e-10	25.335	7.03237e-63	98.96	b1415	aldehyde dehydrogenase A, NAD-linked	COG1012	C	NAD-dependent aldehyde dehydrogenases	N	N	N
EC958_1696	1696	1722476	1723459	-	983	58	501	0.0590031	0.16727	1.43776e-06	14.434	1.01092e-43	46.25	b1779	-	COG0057	G	Glyceraldehyde-3-phosphate dehydrogenase/erythrose-4-phosphate dehydrogenase	N	N	N
EC958_1697	cybB	1723630	1724178	+	548	54	393	0.0985401	0.493971	1.74918e-10	27.6023	1.07427e-24	98.86	b1418	cytochrome b561	COG3038	C	Cytochrome B561	N	N	N
EC958_1698	ydcA	1724441	1724596	+	155	18	250	0.116129	0.626917	3.17126e-12	33.1542	1.66142e-07	98.25	b1419	predicted protein	NA	NA	NA	N	N	N
EC958_1699	trg	1725182	1725523	+	341	23	277	0.0674487	0.232191	2.09615e-07	17.363	1.21634e-15	95.8	b1421	methyl-accepting chemotaxis protein III, ribose and galactose sensor receptor	COG0840	NT	Methyl-accepting chemotaxis protein	N	N	N
EC958_1700	ydcI	1725579	1726484	-	905	79	784	0.0872928	0.39988	2.27255e-09	23.9746	2.60823e-40	99.35	b1422	predicted DNA-binding transcriptional regulator	COG0583	K	Transcriptional regulator	N	N	N
EC958_1701	ydcJ	1726719	1728044	+	1325	98	939	0.0739623	0.285969	4.74751e-08	19.5692	1.11181e-58	97.54	b1423	predicted metalloenzyme	COG5383	S	Uncharacterized protein conserved in bacteria	N	N	N
EC958_1702	opgD	1728323	1729924	+	1601	117	1003	0.0730793	0.27855	5.8062e-08	19.2725	9.42127e-71	99.63	b1424	osmoregulated periplasmic glucan (OPG) biosynthesis periplasmic protein	COG3131	P	Periplasmic glucans biosynthesis protein	N	N	N
EC958_1703	ydcH	1730082	1730288	+	206	17	133	0.0825243	0.35901	6.74032e-09	22.4136	9.76783e-10	98.65	b1426	predicted protein	COG2841	S	Uncharacterized protein conserved in bacteria	N	N	N
EC958_1704	rimL	1730369	1730890	+	521	24	205	0.0460653	0.084853	2.7463e-05	9.74316	1.62953e-23	97.77	b1427	ribosomal-protein-L7/L12-serine acetyltransferase	COG1670	J	Acetyltransferases, including N-acetylases of ribosomal proteins	N	N	N
EC958_1705	ydcK	1730900	1731862	-	962	64	540	0.0665281	0.224806	2.58571e-07	17.0477	8.37975e-43	96.93	b1428	predicted enzyme	COG0663	R	Carbonic anhydrases/acetyltransferases, isoleucine patch superfamily	N	N	N
EC958_1706	tehA	1732004	1732978	+	974	79	1094	0.0811088	0.34686	9.30751e-09	21.9472	2.50245e-43	99.09	b1429	potassium-tellurite ethidium and proflavin transporter	COG1275	P	Tellurite resistance protein and related permeases	N	N	N
EC958_1707	tehB	1732993	1733568	+	575	69	650	0.12	0.653063	1.31202e-12	34.36	7.08213e-26	98.48	b1430	tellurite resistance protein, SAM-dependent; predicted S-adenosyl-L-methionine-dependent methyltransferase	COG2230	M	Cyclopropane fatty acid synthase and related methyltransferases	N	N	N
EC958_1708	ydcL	1733889	1734539	+	650	82	768	0.126154	0.69207	3.22555e-13	36.2668	3.71322e-29	100	b1431	lipoprotein	NA	NA	NA	N	N	N
EC958_1709	ydcO	1734592	1735746	-	1154	82	1026	0.0710572	0.261694	9.207e-08	18.5903	3.35253e-51	97.69	b1433	inner membrane protein, predicted transporter, function unknown	COG3135	Q	Uncharacterized protein involved in benzoate metabolism	N	N	N
EC958_1710	ydcN	1735856	1736374	+	518	31	298	0.0598456	0.173424	1.18648e-06	14.7302	2.20434e-23	97.19	b1434	predicted DNA-binding transcriptional regulator	COG1396	K	Predicted transcriptional regulators	N	N	N
EC958_1711	ydcP	1736423	1738408	+	1985	115	1236	0.0579345	0.159585	1.83438e-06	14.057	1.50797e-87	98.16	b1435	predicted peptidase	COG0826	O	Collagenase and related proteases	N	N	N
EC958_1712	yncJ	1738518	1738670	-	152	10	50	0.0657895	0.218929	3.05994e-07	16.7941	2.24748e-07	98.21	b1436	predicted protein	NA	NA	NA	N	N	N
EC958_1713	hicB	1738966	1739145	+	179	24	272	0.134078	0.737601	5.29609e-14	38.7054	1.48165e-08	96.92	b1438	antitoxin for the HicAB toxin-antitoxin system; mutational suppressor of null rpoE lethality	NA	NA	NA	N	N	N
EC958_1714	ydcR	1739242	1740630	+	1388	127	1319	0.0914986	0.435593	8.71108e-10	25.3394	1.95202e-61	98.72	b1439	fused predicted DNA-binding transcriptional regulator/predicted amino transferase	COG1167	KE	Transcriptional regulators containing a DNA-binding HTH domain and an aminotransferase domain (MocR family) and their eukaryotic orthologs	N	N	N
EC958_1715	ydcS	1740893	1742020	+	1127	122	1529	0.108252	0.570061	1.91071e-11	30.6837	5.08536e-50	98.16	b1440	polyhydroxybutyrate (PHB) synthase, ABC transporter periplasmic binding protein homolog	COG0687	E	Spermidine/putrescine-binding periplasmic protein	N	N	N
EC958_1716	ydcT	1742056	1743051	+	995	64	649	0.0643216	0.207382	4.27619e-07	16.2884	3.0189e-44	98.22	b1441	predicted spermidine/putrescine transporter subunit	COG3842	E	ABC-type spermidine/putrescine transport systems, ATPase components	N	N	N
EC958_1717	ydcU	1743070	1743993	+	923	54	420	0.0585049	0.16367	1.61069e-06	14.2585	4.25644e-41	99.04	b1442	predicted spermidine/putrescine transporter subunit	COG1176	E	ABC-type spermidine/putrescine transport system, permease component I	N	N	N
EC958_1718	ydcV	1744001	1744777	+	776	38	653	0.0489691	0.101143	1.41652e-05	10.8227	1.14461e-34	100	b1443	predicted spermidine/putrescine transporter subunit	COG1177	E	ABC-type spermidine/putrescine transport system, permease component II	N	N	N
EC958_1719	prr	1744817	1746223	+	1406	107	1414	0.0761024	0.304072	2.91443e-08	20.2857	3.18555e-62	98.31	b1444	gamma-aminobutyraldehyde dehydrogenase	COG1012	C	NAD-dependent aldehyde dehydrogenases	N	N	N
EC958_1720	ydcX	1746581	1746784	+	203	9	97	0.044335	0.0758266	4.07452e-05	9.09099	1.32134e-09	98.25	b1445	conserved protein, DUF2566 family	NA	NA	NA	N	N	N
EC958_1721	ydcY	1746888	1747103	+	215	18	205	0.0837209	0.369283	5.13087e-09	22.8067	3.94592e-10	98.7	b1446	predicted protein	NA	NA	NA	N	N	N
EC958_1722	ydcZ	1747122	1747553	-	431	35	330	0.0812065	0.347698	9.10254e-09	21.9795	1.40785e-19	98.66	b1447	inner membrane protein, DUF606 family	COG3238	S	Uncharacterized protein conserved in bacteria	N	N	N
EC958_1723	yncA	1747568	1748131	-	563	45	510	0.079929	0.336741	1.21804e-08	21.5574	2.37154e-25	98.84	b1448	predicted acyltransferase with acyl-CoA N-acyltransferase domain	COG1247	M	Sortase and related acyltransferases	N	N	N
EC958_1724	mcbR	1748293	1748511	+	218	17	130	0.0779817	0.320079	1.89879e-08	20.9117	2.91697e-10	89.29	b1450	colanic acid and biofilm gene transcriptional regulator, MqsR-controlled	NA	NA	NA	N	N	N
EC958_1725	yncD	1748567	1750651	-	2084	157	1602	0.0753359	0.29757	3.47099e-08	20.0295	7.05094e-92	97.57	b1451	predicted iron outer membrane transporter	COG1629	P	Outer membrane receptor proteins, mostly Fe transport	N	N	N
EC958_1726	yncE	1750911	1751954	+	1043	67	717	0.0642378	0.206728	4.3587e-07	16.2594	2.40096e-46	97.73	b1452	conserved protein	COG3391	S	Uncharacterized conserved protein	N	N	N
EC958_1727	ansP	1752085	1753566	-	1481	108	1283	0.0729237	0.277246	6.01592e-08	19.2201	1.67021e-65	99.6	b1453	L-asparagine transporter	COG1113	E	Gamma-aminobutyrate permease and related permeases	N	N	N
EC958_1728	yhhI	1754396	1755514	+	1118	49	371	0.0438283	0.0732822	4.57351e-05	8.89865	1.25884e-49	98.41	b3484	predicted transposase	COG5433	L	Transposase	N	N	N
EC958_1729	yddH	1755603	1756154	-	551	57	460	0.103448	0.533171	5.71275e-11	29.1648	7.94139e-25	94.71	b1462	conserved protein	COG1853	R	Conserved protein/domain typically associated with flavoprotein oxygenases, DIM6/NTAB family	N	N	N
EC958_1730	nhoA	1756347	1757174	+	827	62	635	0.0749698	0.294471	3.77316e-08	19.907	6.72938e-37	96.44	b1463	N-hydroxyarylamine O-acetyltransferase	COG2162	Q	Arylamine N-acetyltransferase	N	N	N
EC958_1731	yddE	1757288	1758163	-	875	55	589	0.0628571	0.196052	5.97123e-07	15.7813	5.35193e-39	96.3	b1464	conserved predicted enzyme, PhzC-PhzF family	COG0384	R	Predicted epimerase, PhzC/PhzF homolog	N	N	N
EC958_1732	narV	1758261	1758923	-	662	40	276	0.060423	0.177688	1.04013e-06	14.9326	1.10888e-29	88.05	b1465	nitrate reductase 2 (NRZ), gamma subunit	COG2181	C	Nitrate reductase gamma subunit	N	N	N
EC958_1733	narW	1758938	1759615	-	677	51	491	0.0753323	0.29754	3.4738e-08	20.0284	2.44795e-30	95.67	b1466	nitrate reductase 2 (NRZ), delta subunit (assembly subunit)	COG2180	C	Nitrate reductase delta subunit	N	N	N
EC958_1734	narY	1759633	1761159	-	1526	103	1241	0.0674967	0.232579	2.07332e-07	17.3794	1.7969e-67	99.61	b1467	nitrate reductase 2 (NRZ), beta subunit	COG1140	C	Nitrate reductase beta subunit	N	N	N
EC958_1735	narZ	1761174	1764896	-	3722	247	2478	0.0663622	0.223482	2.68538e-07	16.9908	1.59963e-163	99.28	b1468	nitrate reductase 2 (NRZ), alpha subunit	COG5013	C	Nitrate reductase alpha subunit	N	N	N
EC958_1736	narU	1765009	1766379	-	1370	149	1350	0.108759	0.573862	1.70208e-11	30.8435	1.19614e-60	99.57	b1469	nitrate/nitrite transporter	COG2223	P	Nitrate/nitrite transporter	N	N	N
EC958_1737	yddG	1766670	1767476	-	806	179	2412	0.222084	0.969014	1.0229e-22	64.9653	5.57816e-36	98.91	b1473	aromatic amino acid exporter	NA	NA	NA	N	N	N
EC958_1738	fdnG	1767783	1768352	+	569	40	353	0.0702988	0.255427	1.0945e-07	18.3334	1.29598e-25	100	b1474	formate dehydrogenase-N, alpha subunit, nitrate-inducible	COG0243	C	Anaerobic dehydrogenases, typically selenocysteine-containing	N	N	N
EC958_1739	fdnG	1768419	1770812	+	2393	214	2885	0.0894275	0.418064	1.39683e-09	24.6686	2.15251e-105	99.38	b1474	formate dehydrogenase-N, alpha subunit, nitrate-inducible	COG0243	C	Anaerobic dehydrogenases, typically selenocysteine-containing	N	N	N
EC958_1740	fdnH	1770843	1771709	+	866	69	937	0.0796767	0.334579	1.29015e-08	21.4739	1.32483e-38	98.98	b1475	formate dehydrogenase-N, Fe-S (beta) subunit, nitrate-inducible	COG0437	C	Fe-S-cluster-containing hydrogenase components 1	N	N	N
EC958_1741	fdnI	1771702	1772355	+	653	58	741	0.0888208	0.412907	1.60403e-09	24.4717	2.74495e-29	99.54	b1476	formate dehydrogenase-N, cytochrome B556 (gamma) subunit, nitrate-inducible	COG2864	C	Cytochrome b subunit of formate dehydrogenase	N	N	N
EC958_1742	yddM	1772423	1772689	-	266	5	77	0.018797	0.00413599	0.013765	-1.93833	2.31989e-12	100	b1477	predicted DNA-binding transcriptional regulator	COG3093	R	Plasmid maintenance system antidote protein	N	N	N
EC958_1743	1743	1772707	1772862	-	155	18	124	0.116129	0.626917	3.17126e-12	33.1542	1.66142e-07	29.03	b0480	-	COG3549	R	Plasmid maintenance system killer protein	N	N	N
EC958_1744	adhP	1773170	1774195	-	1025	70	673	0.0682927	0.239016	1.72923e-07	17.6512	1.47124e-45	97.92	b1478	ethanol-active dehydrogenase/acetaldehyde-active reductase	COG1064	R	Zn-dependent alcohol dehydrogenases	N	N	N
EC958_1745	maeA	1774317	1775996	-	1679	129	1517	0.0768314	0.310271	2.46813e-08	20.5289	3.65157e-74	99.47	b1479	malate dehydrogenase, (decarboxylating, NAD-requiring) (malic enzyme)	COG0281	C	Malic enzyme	N	N	N
EC958_1746	1746	1776030	1776134	+	104	21	245	0.201923	0.94705	1.01426e-20	59.0474	2.82592e-05	35.9	b3847	-	NA	NA	NA	N	N	N
EC958_1747	sra	1776170	1776289	-	119	8	20	0.0672269	0.230406	2.20487e-07	17.2871	6.23846e-06	100	b1480	Stationary-phase-induced ribosome-associated protein	NA	NA	NA	N	N	N
EC958_1748	bdm	1776409	1776606	-	197	59	660	0.299492	0.996651	2.21367e-30	87.3691	2.41795e-09	98.59	b1481	biofilm-dependent modulation protein	NA	NA	NA	N	N	N
EC958_1749	1749	1776790	1776912	+	122	16	116	0.131148	0.721379	1.0331e-13	37.8056	4.6117e-06	33.33	b2372	-	NA	NA	NA	N	N	N
EC958_1750	osmC	1776967	1777380	+	413	49	372	0.118644	0.644044	1.78731e-12	33.9382	8.62695e-19	100	b1482	osmotically inducible, stress-inducible membrane protein	COG1764	O	Predicted redox protein, regulator of disulfide bond formation	N	N	N
EC958_1751	1751	1777380	1777508	-	128	10	49	0.078125	0.321303	1.83774e-08	20.9593	2.52016e-06	28.21	b1212	-	NA	NA	NA	N	N	N
EC958_1752	dosP	1777588	1779969	-	2381	187	1840	0.0785384	0.324837	1.67243e-08	21.0966	7.20793e-105	98.87	b1489	oxygen sensor, c-di-GMP phosphodiesterase, heme-regulated	COG2200	T	FOG: EAL domain	N	N	N
EC958_1753	dosC	1779990	1780205	-	215	36	336	0.167442	0.875028	2.63258e-17	48.8088	3.94592e-10	97.56	b1490	diguanylate cyclase	COG2199	T	FOG: GGDEF domain	N	N	N
EC958_1754	yddW	1780553	1781854	-	1301	107	1068	0.0822444	0.356608	7.18439e-09	22.3215	1.2467e-57	99.09	b1491	liprotein, glycosyl hydrolase homolog	COG1649	S	Uncharacterized protein conserved in bacteria	N	N	N
EC958_1755	gadC	1782003	1783520	-	1517	158	1830	0.104153	0.538679	4.86487e-11	29.3883	4.44808e-67	99.61	b1492	predicted glutamate:gamma-aminobutyric acid antiporter	COG0531	E	Amino acid transporters	N	N	N
EC958_1756	gadB	1783703	1784059	-	356	58	850	0.162921	0.86102	7.37887e-17	47.453	2.68517e-16	100	b1493	glutamate decarboxylase B, PLP-dependent	COG0076	E	Glutamate decarboxylase and related PLP-dependent proteins	N	N	N
EC958_1759	pqqL	1784439	1785275	-	836	63	335	0.0753589	0.297765	3.45287e-08	20.0372	2.71848e-37	97.89	b1494	predicted peptidase	COG0612	R	Predicted Zn-dependent peptidases	N	N	N
EC958_1760	ydeM	1785362	1786501	-	1139	36	113	0.0316067	0.026062	0.000741988	4.02153	1.51864e-50	98.96	b1497	conserved protein	COG0641	R	Arylsulfatase regulator (Fe-S oxidoreductase)	N	N	N
EC958_1761	ydeN	1786571	1788235	-	1664	172	874	0.103365	0.532521	5.82174e-11	29.1385	1.6541e-73	99.46	b1498	conserved protein	COG3119	P	Arylsulfatase A and related enzymes	N	N	N
EC958_1762	ydeO	1788655	1789398	-	743	35	189	0.0471063	0.0905316	2.16603e-05	10.1323	3.17715e-33	98.02	b1499	transcriptional activator for mdtEF	COG2207	K	AraC-type DNA-binding domain-containing proteins	N	N	N
EC958_1763	yneN	1789491	1789670	-	179	1	1	0.00558659	3.34494e-05	0.27979	-11.3297	1.48165e-08	95.31	b1500	Two component system connector membrane protein, EvgSA to PhoQP	NA	NA	NA	Y	N	N
EC958_1764	ydeP	1789936	1792197	-	2261	219	1714	0.0968598	0.480244	2.56577e-10	27.0646	1.27783e-99	99.6	b1501	predicted oxidoreductase	COG0243	C	Anaerobic dehydrogenases, typically selenocysteine-containing	N	N	N
EC958_1765	ydeQ	1792554	1793450	-	896	28	102	0.03125	0.0250934	0.000804847	3.87054	6.45647e-40	96.71	b1502	predicted fimbrial-like adhesin protein	NA	NA	NA	N	N	N
EC958_1766	ydeR	1793528	1794013	-	485	70	286	0.14433	0.788763	5.1152e-15	41.8358	6.11872e-22	97.6	b1503	predicted fimbrial-like adhesin protein	COG3539	NU	P pilus assembly protein, pilin FimA	N	N	N
EC958_1767	ydeS	1794044	1794556	-	512	44	292	0.0859375	0.388289	3.09537e-09	23.5324	4.03377e-23	97.73	b1504	predicted fimbrial-like adhesin protein	COG3539	NU	P pilus assembly protein, pilin FimA	N	N	N
EC958_1768	fimD	1794588	1796792	-	2204	261	1344	0.118421	0.642546	1.88054e-12	33.8688	3.97728e-97	60.84	b4317	outer membrane usher protein, type 1 fimbrial synthesis	COG3188	NU	P pilus assembly protein, porin PapC	N	N	N
EC958_1769	1769	1797281	1797973	-	692	85	426	0.122832	0.671411	6.87839e-13	35.2391	5.40405e-31	58.8	b4316	-	COG3121	NU	P pilus assembly protein, chaperone PapD	N	N	N
EC958_1770	fimA	1798353	1798898	-	545	46	212	0.0844037	0.375142	4.39125e-09	23.0306	1.45321e-24	65.24	b4314	major type 1 subunit fimbrin (pilin)	COG3539	NU	P pilus assembly protein, pilin FimA	N	N	N
EC958_1773	hipA	1799827	1801110	-	1283	66	512	0.0514419	0.116092	8.06057e-06	11.7286	7.63945e-57	97.92	b1507	serine protein kinase required for perister formation; toxin of HipAB toxin-antitoxin system	COG3550	R	Uncharacterized protein related to capsule biosynthesis enzymes	N	N	N
EC958_1774	hipB	1801149	1801397	-	248	3	9	0.0120968	0.000763329	0.0634179	-5.86499	1.42156e-11	96.59	b1508	antitoxin of HipAB toxin-antitoxin system	COG1476	K	Predicted transcriptional regulators	Y	N	N
EC958_1775	tam	1801723	1802463	+	740	45	469	0.0608108	0.180573	9.52107e-07	15.0684	4.29788e-33	94.84	b1519	trans-aconitate methyltransferase	COG4106	R	Trans-aconitate methyltransferase	N	N	N
EC958_1776	yneE	1802485	1803381	-	896	60	536	0.0669643	0.228298	2.34092e-07	17.1972	6.45647e-40	99.67	b1520	predicted inner membrane protein, bestrophin family	COG3781	S	Predicted membrane protein	N	N	N
EC958_1777	uxaB	1803596	1805029	-	1433	86	690	0.060014	0.174664	1.14179e-06	14.7893	2.10008e-63	99.38	b1521	altronate oxidoreductase, NAD-dependent	COG0246	G	Mannitol-1-phosphate/altronate dehydrogenases	N	N	N
EC958_1778	yneF	1805274	1806674	-	1400	105	852	0.075	0.294727	3.74725e-08	19.9171	5.82931e-62	98.41	b1522	predicted diguanylate cyclase	COG2199	T	FOG: GGDEF domain	N	N	N
EC958_1779	yneG	1806831	1807172	-	341	30	219	0.0879765	0.405715	1.94452e-09	24.1972	1.21634e-15	95.8	b1523	conserved protein	NA	NA	NA	N	N	N
EC958_1780	yneH	1807190	1808098	-	908	74	928	0.0814978	0.350198	8.51764e-09	22.0755	1.9281e-40	99.68	b1524	glutaminase	COG2066	E	Glutaminase	N	N	N
EC958_1781	sad	1808180	1809550	-	1370	94	1207	0.0686131	0.24162	1.60739e-07	17.7604	1.19614e-60	99.13	b1525	succinate semialdehyde dehydrogenase, NAD(P)+-dependent	COG1012	C	NAD-dependent aldehyde dehydrogenases	N	N	N
EC958_1782	yneJ	1809669	1810532	+	863	69	672	0.0799537	0.336953	1.2112e-08	21.5656	1.79216e-38	97.95	b1526	predicted DNA-binding transcriptional regulator	COG0583	K	Transcriptional regulator	N	N	N
EC958_1783	ydeA	1810889	1812061	+	1172	104	1283	0.0887372	0.412195	1.63491e-09	24.4445	5.47109e-52	99.49	b1528	predicted arabinose transporter	COG2814	G	Arabinose efflux permease	N	N	N
EC958_1784	marC	1812104	1812751	-	647	73	898	0.112828	0.603673	6.73051e-12	32.1219	5.02305e-29	99.55	b1529	inner membrane protein, UPF0056 family	COG2095	U	Multiple antibiotic transporter	N	N	N
EC958_1785	marR	1812981	1813397	+	416	29	768	0.0697115	0.250597	1.2513e-07	18.1341	6.37735e-19	97.92	b1530	DNA-binding transcriptional repressor of multiple antibiotic resistance	COG1846	K	Transcriptional regulators	N	N	N
EC958_1786	marA	1813436	1813801	+	365	20	79	0.0547945	0.137828	3.7532e-06	12.9394	1.08473e-16	99.21	b1531	DNA-binding transcriptional dual activator of multiple antibiotic resistance	COG2207	K	AraC-type DNA-binding domain-containing proteins	N	N	N
EC958_1787	marB	1813851	1814051	+	200	13	134	0.065	0.212695	3.6634e-07	16.5224	1.78744e-09	94.44	b1532	predicted protein	NA	NA	NA	N	N	N
EC958_1788	eamA	1814100	1814981	-	881	53	477	0.0601589	0.175734	1.10468e-06	14.8401	2.92468e-39	98.33	b1533	cysteine and O-acetyl-L-serine efflux system	COG5006	R	Predicted permease, DMT superfamily	N	N	N
EC958_1789	ydeE	1815194	1816363	+	1169	165	1931	0.141146	0.773789	1.05705e-14	40.8664	7.401e-52	97.72	b1534	predicted transporter	COG2814	G	Arabinose efflux permease	N	N	N
EC958_1790	ydeH	1816822	1817694	-	872	169	1114	0.193807	0.934731	6.45277e-20	56.6522	7.23981e-39	99.32	b1535	diguanylate cyclase, required for pgaD induction	COG2199	T	FOG: GGDEF domain	N	N	N
EC958_1791	ydeI	1817966	1818103	-	137	23	129	0.167883	0.876328	2.38057e-17	48.9409	1.01807e-06	82.35	b1536	conserved protein	COG3111	S	Uncharacterized conserved protein	N	N	N
EC958_1792	dcp	1818219	1820246	-	2027	235	2120	0.115935	0.625574	3.3148e-12	33.0936	2.19463e-89	98.24	b1538	dipeptidyl carboxypeptidase II	COG0339	E	Zn-dependent oligopeptidases	N	N	N
EC958_1793	ydfG	1820401	1821129	+	728	56	627	0.0769231	0.311051	2.4171e-08	20.5594	1.4392e-32	99.19	b1539	L-allo-threonine dehydrogenase, NAD(P)-binding	COG4221	R	Short-chain alcohol dehydrogenase of unknown specificity	N	N	N
EC958_1794	ydfH	1821236	1821904	+	668	34	289	0.0508982	0.112723	9.1244e-06	11.5304	6.05971e-30	100	b1540	predicted DNA-binding transcriptional regulator	COG1802	K	Transcriptional regulators	N	N	N
EC958_1795	ydfZ	1822099	1822284	+	185	10	90	0.0540541	0.132889	4.44345e-06	12.6736	8.09681e-09	100	b1541	selenoprotein, function unknown	NA	NA	NA	N	N	N
EC958_1796	ydfI	1822338	1823780	-	1442	89	967	0.0617198	0.187396	7.73886e-07	15.3857	8.48371e-64	97.33	b1542	predicted mannonate dehydrogenase	COG0246	G	Mannitol-1-phosphate/altronate dehydrogenases	N	N	N
EC958_1797	1797	1823887	1825197	-	1310	167	1616	0.127481	0.700065	2.38342e-13	36.6764	5.03632e-58	33.89	b1981	-	COG2271	G	Sugar phosphate permease	N	N	N
EC958_1798	rspB	1825312	1826313	-	1001	88	397	0.0879121	0.405165	1.9733e-09	24.1762	1.64974e-44	98.23	b1580	predicted oxidoreductase, Zn-dependent and NAD(P)-binding	COG1063	ER	Threonine dehydrogenase and related Zn-dependent dehydrogenases	N	N	N
EC958_1799	rspA	1826343	1827539	-	1196	100	941	0.083612	0.368349	5.25984e-09	22.771	4.87912e-53	99.75	b1581	bifunctional D-altronate/D-mannonate dehydratase	COG4948	MR	L-alanine-DL-glutamate epimerase and related enzymes of enolase superfamily	N	N	N
EC958_1800	ynfA	1827763	1828071	-	308	29	212	0.0941558	0.457872	4.75286e-10	26.1965	3.37626e-14	100	b1582	inner membrane protein, UPF0060 family	COG1742	S	Uncharacterized conserved protein	N	N	N
EC958_1801	ynfB	1828224	1828547	+	323	31	218	0.0959752	0.472962	3.13909e-10	26.781	7.45338e-15	96.46	b1583	predicted protein	NA	NA	NA	N	N	N
EC958_1802	speG	1828600	1829142	+	542	106	1246	0.195572	0.937612	4.31538e-20	57.1736	1.96583e-24	99.46	b1584	spermidine N1-acetyltransferase	COG1670	J	Acetyltransferases, including N-acetylases of ribosomal proteins	N	N	N
EC958_1803	ynfC	1829163	1829855	-	692	118	1497	0.17052	0.883857	1.30488e-17	49.73	5.40405e-31	98.31	b1585	lipoprotein, UPF0257 family	NA	NA	NA	N	N	N
EC958_1804	ynfD	1829981	1830268	+	287	51	486	0.1777	0.902372	2.53872e-18	51.8728	2.79867e-13	96.04	b1586	predicted protein	NA	NA	NA	N	N	N
EC958_1805	ynfE	1830485	1832893	+	2408	185	1649	0.0768272	0.310235	2.4705e-08	20.5275	4.75184e-106	98.89	b1587	probable selenate reductase, periplasmic	COG0243	C	Anaerobic dehydrogenases, typically selenocysteine-containing	N	N	N
EC958_1806	ynfF	1832999	1833715	+	716	60	520	0.0837989	0.369952	5.04048e-09	22.8323	4.81933e-32	98.25	b1588	S- and N-oxide reductase, A subunit, periplasmic	COG0243	C	Anaerobic dehydrogenases, typically selenocysteine-containing	N	N	N
EC958_1807	ynfF	1833730	1834449	+	719	52	421	0.0723227	0.27222	6.89944e-08	19.0177	3.56263e-32	97.96	b1588	S- and N-oxide reductase, A subunit, periplasmic	COG0243	C	Anaerobic dehydrogenases, typically selenocysteine-containing	N	N	N
EC958_1808	ynfG	1834552	1835151	+	599	39	384	0.0651085	0.213549	3.57388e-07	16.5598	6.31585e-27	100	b1589	oxidoreductase, Fe-S subunit	COG0437	C	Fe-S-cluster-containing hydrogenase components 1	N	N	N
EC958_1809	ynfH	1835171	1836007	+	836	74	983	0.0885167	0.410319	1.71918e-09	24.3729	2.71848e-37	96.83	b1590	oxidoreductase, membrane subunit	COG3302	R	DMSO reductase anchor subunit	N	N	N
EC958_1810	dmsD	1836068	1836664	+	596	24	261	0.0402685	0.0567027	0.000102975	7.52843	8.54375e-27	99.02	b1591	twin-argninine leader-binding protein for DmsA and TorA	COG3381	R	Uncharacterized component of anaerobic dehydrogenases	N	N	N
EC958_1811	clcB	1836843	1838117	+	1274	91	970	0.0714286	0.264775	8.45951e-08	18.7158	1.89109e-56	98.56	b1592	chloride channel, voltage-gated	COG0038	P	Chloride channel protein EriC	N	N	N
EC958_1812	1812	1838590	1838811	+	221	19	157	0.0859729	0.388592	3.07052e-09	23.544	2.15633e-10	30.23	b2284	-	NA	NA	NA	N	N	N
EC958_1813	dgsA	1838908	1840110	-	1202	88	689	0.0732113	0.279657	5.63408e-08	19.3169	2.6663e-53	99.51	b1594	Global DNA-binding transcriptional repressor; autorepressor; required for anaerobic growth on glucosamine	COG1940	KG	Transcriptional regulator/sugar kinase	N	N	N
EC958_1814	ynfL	1840263	1841138	-	875	75	679	0.0857143	0.386377	3.25697e-09	23.4595	5.35193e-39	98.32	b1595	predicted DNA-binding transcriptional regulator	COG0583	K	Transcriptional regulator	N	N	N
EC958_1815	ynfM	1841263	1842498	+	1235	151	2049	0.122267	0.667803	7.82434e-13	35.0639	9.60565e-55	99.04	b1596	predicted transporter	COG2814	G	Arabinose efflux permease	N	N	N
EC958_1816	asr	1842913	1843230	+	317	35	458	0.11041	0.586106	1.16817e-11	31.3629	1.36391e-14	98.04	b1597	acid shock-inducible periplasmic protein	NA	NA	NA	N	N	N
EC958_1817	ydgD	1843524	1844327	+	803	47	401	0.0585305	0.163855	1.60131e-06	14.2675	7.54584e-36	99.63	b1598	predicted peptidase	COG3591	E	V8-like Glu-specific endopeptidase	N	N	N
EC958_1818	mdtI	1844384	1844695	-	311	25	175	0.0803859	0.340658	1.09754e-08	21.7085	2.49585e-14	100	b1599	multidrug efflux system transporter	COG2076	P	Membrane transporters of cations and cationic drugs	N	N	N
EC958_1819	mdtJ	1844700	1845047	-	347	52	508	0.149856	0.812874	1.45108e-15	43.5129	6.64693e-16	100	b1600	multidrug efflux system transporter	COG2076	P	Membrane transporters of cations and cationic drugs	N	N	N
EC958_1820	tqsA	1845477	1846493	+	1016	86	722	0.0846457	0.377217	4.15552e-09	23.1099	3.64195e-45	99.71	b1601	pheromone AI-2 transporter	COG0628	R	Predicted permease	N	N	N
EC958_1821	pntB	1846536	1847906	-	1370	95	1106	0.0693431	0.247577	1.36096e-07	18.0089	1.19614e-60	99.78	b1602	pyridine nucleotide transhydrogenase, beta subunit	COG1282	C	NAD/NADP transhydrogenase beta subunit	N	N	N
EC958_1822	pntA	1847935	1849449	-	1514	115	1129	0.0759577	0.302843	3.01218e-08	20.2374	6.01712e-67	99.61	b1603	pyridine nucleotide transhydrogenase, alpha subunit	COG3288	C	NAD/NADP transhydrogenase alpha subunit	N	N	N
EC958_1823	ydgH	1849991	1850917	+	926	73	612	0.0788337	0.327362	1.56355e-08	21.1946	3.14651e-41	99.68	b1604	predicted protein	NA	NA	NA	N	N	N
EC958_1824	ydgI	1851121	1852485	+	1364	84	654	0.0615836	0.186368	7.98305e-07	15.3382	2.18885e-60	100	b1605	predicted arginine/ornithine antiporter transporter	COG0531	E	Amino acid transporters	N	N	N
EC958_1825	folM	1852540	1853244	+	704	56	469	0.0795455	0.333455	1.32934e-08	21.4305	1.61381e-31	98.33	b1606	dihydromonapterin reductase, NADPH-dependent; dihydrofolate reductase isozyme	COG1028	IQR	Dehydrogenases with different specificities (related to short-chain alcohol dehydrogenases)	N	N	N
EC958_1826	ydgC	1853259	1853576	-	317	37	347	0.116719	0.630982	2.77199e-12	33.3384	1.36391e-14	99.1	b1607	inner membrane protein, GlpM family	COG3136	R	Uncharacterized membrane protein required for alginate biosynthesis	N	N	N
EC958_1827	rstA	1853723	1854424	+	701	44	352	0.0627675	0.195365	6.09456e-07	15.7502	2.18308e-31	97.91	b1608	multicopy supressor of yjeE, yeaZ or ygjD deletion lethality, predicted response regulator of two-component regulatory system with sensor protein RstB	COG0745	TK	Response regulators consisting of a CheY-like receiver domain and a winged-helix DNA-binding domain	N	N	N
EC958_1828	rstB	1854446	1855729	+	1283	79	608	0.0615744	0.186299	7.9997e-07	15.335	7.63945e-57	99.54	b1609	sensory histidine kinase in two-component regulatory system with RstA	COG0642	T	Signal transduction histidine kinase	N	N	N
EC958_1829	tus	1855811	1856734	+	923	67	679	0.0725894	0.274448	6.4924e-08	19.1075	4.25644e-41	98.38	b1610	inhibitor of replication at Ter, DNA-binding protein	NA	NA	NA	N	N	N
EC958_1830	fumC	1856749	1858134	-	1385	94	1130	0.06787	0.235592	1.90415e-07	17.507	2.64058e-61	99.57	b1611	fumarate hydratase (fumarase C),aerobic Class II	COG0114	C	Fumarase	N	N	N
EC958_1831	fumA	1858295	1859923	-	1628	104	821	0.0638821	0.20396	4.72693e-07	16.1364	6.21099e-72	99.82	b1612	fumarate hydratase (fumarase A), aerobic Class I	COG1951	C	Tartrate dehydratase alpha subunit/Fumarate hydratase class I, N-terminal domain	N	N	N
EC958_1832	manA	1860140	1861297	+	1157	70	541	0.0605013	0.178269	1.02172e-06	14.9601	2.47831e-51	98.21	b1613	mannose-6-phosphate isomerase	COG1482	G	Phosphomannose isomerase	N	N	N
EC958_1833	ydgA	1861416	1862906	+	1490	82	768	0.0550336	0.139439	3.55413e-06	13.025	6.74716e-66	99.2	b1614	conserved protein, DUF945 family	COG5339	S	Uncharacterized protein conserved in bacteria	N	N	N
EC958_1834	uidC	1862969	1864015	-	1046	129	903	0.123327	0.674546	6.14489e-13	35.3923	1.77488e-46	99.71	b1615	predicted outer membrane porin protein	NA	NA	NA	N	N	N
EC958_1835	uidC	1864002	1864199	-	197	39	212	0.19797	0.941341	2.49814e-20	57.8816	2.41795e-09	98.51	b1615	predicted outer membrane porin protein	NA	NA	NA	N	N	N
EC958_1836	uidB	1864274	1865161	-	887	74	581	0.0834273	0.366763	5.48614e-09	22.7104	1.59825e-39	98.34	b1616	glucuronide transporter	COG2211	G	Na+/melibiose symporter and related transporters	N	N	N
EC958_1837	uidB	1865176	1865628	-	452	32	304	0.0707965	0.259536	9.77091e-08	18.502	1.69841e-20	98.05	b1616	glucuronide transporter	COG2211	G	Na+/melibiose symporter and related transporters	N	N	N
EC958_1838	uidA	1865643	1867436	-	1793	112	941	0.0624651	0.193054	6.52948e-07	15.6451	3.76922e-79	99.5	b1617	beta-D-glucuronidase	COG3250	G	Beta-galactosidase/beta-glucuronidase	N	N	N
EC958_1839	uidR	1867844	1868416	-	572	37	341	0.0646853	0.210225	3.93589e-07	16.4139	9.58034e-26	100	b1618	DNA-binding transcriptional repressor	COG1309	K	Transcriptional regulator	N	N	N
EC958_1840	hdhA	1868663	1869412	-	749	91	820	0.121495	0.662833	9.3299e-13	34.8244	1.73622e-33	98.04	b1619	7-alpha-hydroxysteroid dehydrogenase, NAD-dependent	COG1028	IQR	Dehydrogenases with different specificities (related to short-chain alcohol dehydrogenases)	N	N	N
EC958_1841	malI	1869542	1870552	-	1010	56	364	0.0554455	0.142233	3.23548e-06	13.1723	6.66449e-45	99.12	b1620	transcriptional repressor of Mal regulon	COG1609	K	Transcriptional regulators	N	N	N
EC958_1842	malX	1870745	1872319	+	1574	121	1093	0.0768742	0.310635	2.44418e-08	20.5431	1.42909e-69	99.06	b1621	fused maltose and glucose-specific PTS enzymes: IIB component, IIC component	COG1263	G	Phosphotransferase system IIC components, glucose/maltose/N-acetylglucosamine-specific	N	N	N
EC958_1843	malY	1872347	1873501	+	1154	87	1024	0.0753899	0.298028	3.42847e-08	20.0476	3.35253e-51	98.71	b1622	bifunctional beta-cystathionase, PLP-dependent/ regulator of maltose regulon	COG1168	E	Bifunctional PLP-dependent enzyme with beta-cystathionase and maltose regulon repressor activities	N	N	N
EC958_1844	add	1873623	1874606	+	983	63	546	0.0640895	0.205573	4.50855e-07	16.2082	1.01092e-43	99.1	b1623	adenosine deaminase	COG1816	F	Adenosine deaminase	N	N	N
EC958_1845	ydgJ	1874660	1875682	-	1022	80	662	0.0782779	0.32261	1.77478e-08	21.0101	1.99022e-45	99.13	b1624	predicted oxidoreductase	COG0673	R	Predicted dehydrogenases and related proteins	N	N	N
EC958_1846	blr	1875943	1876050	+	107	23	395	0.214953	0.962455	5.1992e-22	62.8771	2.08902e-05	95.12	b4409	beta-lactam resistance membrane protein	NA	NA	NA	N	N	N
EC958_1847	cnu	1876340	1876537	+	197	39	373	0.19797	0.941341	2.49814e-20	57.8816	2.41795e-09	100	b1625	oriC-binding complex H-NS/Cnu; binds 26 bp cnb site; also forms a complex with StpA	NA	NA	NA	N	N	N
EC958_1848	ydgK	1876641	1877063	+	422	87	722	0.206161	0.952603	3.8593e-21	60.295	3.48504e-19	99.32	b1626	inner membrane protein, DUF2569 family	NA	NA	NA	N	N	N
EC958_1849	rsxA	1877158	1877721	+	563	43	458	0.0763766	0.306401	2.73785e-08	20.3772	2.37154e-25	100	b1627	electron transport complex protein required for the reduction of SoxR	COG4657	C	Predicted NADH:ubiquinone oxidoreductase, subunit RnfA	N	N	N
EC958_1850	rsxB	1877739	1878299	+	560	28	235	0.05	0.107259	1.1198e-05	11.2018	3.20809e-25	98.96	b1628	electron transport complex protein, iron-sulfur protein, required for the reduction of SoxR	COG2878	C	Predicted NADH:ubiquinone oxidoreductase, subunit RnfB	N	N	N
EC958_1851	rsxC	1878310	1880712	+	2402	176	1158	0.0732723	0.280169	5.55632e-08	19.3374	8.6955e-106	97.3	b1629	electron transport complex protein required for the reduction of SoxR; predicted membrane-associated NADH oxidoreductase	COG4656	C	Predicted NADH:ubiquinone oxidoreductase, subunit RnfC	N	N	N
EC958_1852	rsxD	1880731	1881771	+	1040	82	565	0.0788462	0.327469	1.55911e-08	21.1987	3.24789e-46	98.3	b1630	electron transport complex protein required for the reduction of SoxR; predicted membrane protein	COG4658	C	Predicted NADH:ubiquinone oxidoreductase, subunit RnfD	N	N	N
EC958_1853	rsxG	1881793	1882395	+	602	32	229	0.0531561	0.127003	5.45292e-06	12.3501	4.66891e-27	99.51	b1631	electron transport complex protein required for the reduction of SoxR	COG4659	C	Predicted NADH:ubiquinone oxidoreductase, subunit RnfG	N	N	N
EC958_1854	rsxE	1882417	1883094	+	677	44	299	0.0649926	0.212637	3.66957e-07	16.5199	2.44795e-30	98.7	b1632	electron transport complex inner membrane NADH-quinone reductase required for the reduction of SoxR	COG4660	C	Predicted NADH:ubiquinone oxidoreductase, subunit RnfE	N	N	N
EC958_1855	nth	1883112	1883729	+	617	29	172	0.0470016	0.0899522	2.21836e-05	10.0932	1.0307e-27	99.53	b1633	DNA glycosylase and apyrimidinic (AP) lyase (endonuclease III)	COG0177	L	Predicted EndoIII-related endonuclease	N	N	N
EC958_1856	1856	1883875	1884057	+	182	5	51	0.0274725	0.0161923	0.00190436	2.22998	1.09529e-08	38.46	b0277	-	NA	NA	NA	N	N	N
EC958_1857	dtpA	1884358	1885842	+	1484	106	1045	0.0714286	0.264775	8.45951e-08	18.7158	1.23468e-65	99.4	b1634	dipeptide and tripeptide permease A	COG3104	E	Dipeptide/tripeptide permease	N	N	N
EC958_1858	gst	1885966	1886553	+	587	52	417	0.088586	0.410908	1.69224e-09	24.3954	2.11494e-26	100	b1635	glutathionine S-transferase	COG0625	O	Glutathione S-transferase	N	N	N
EC958_1859	pdxY	1886615	1887457	-	842	70	742	0.0831354	0.364257	5.86366e-09	22.6145	1.48557e-37	99.3	b1636	pyridoxamine kinase	COG2240	H	Pyridoxal/pyridoxine/pyridoxamine kinase	N	N	N
EC958_1860	tyrS	1887537	1888793	-	1256	0	0	0	0	1	-173.929	1.15881e-55	100	b1637	tyrosyl-tRNA synthetase	COG0162	J	Tyrosyl-tRNA synthetase	Y	Y	Y
EC958_1861	pdxH	1888940	1889578	-	638	25	62	0.039185	0.052114	0.000131831	7.10422	1.24342e-28	100	b1638	pyridoxine 5'-phosphate oxidase	COG0259	H	Pyridoxamine-phosphate oxidase	N	N	N
EC958_1862	mliC	1889655	1889966	-	311	18	173	0.0578778	0.159181	1.85824e-06	14.0369	2.49585e-14	95.41	b1639	inhibitor of C-lysozyme, membrane-bound; predicted lipoprotein	COG3895	R	Predicted periplasmic protein	N	N	N
EC958_1863	anmK	1890082	1891173	-	1091	91	889	0.0834097	0.366612	5.50816e-09	22.7046	1.9095e-48	99.46	b1640	anhydro-N-acetylmuramic acid kinase	COG2377	O	Predicted molecular chaperone distantly related to HSP70-fold metalloproteases	N	N	N
EC958_1864	slyB	1891465	1891914	+	449	44	429	0.0979955	0.489538	1.98043e-10	27.4282	2.29752e-20	98.06	b1641	outer membrane lipoprotein	COG3133	M	Outer membrane lipoprotein	N	N	N
EC958_1865	slyA	1891979	1892395	-	416	42	460	0.100962	0.513486	1.0071e-10	28.3746	6.37735e-19	98.61	b1642	DNA-binding transcriptional activator	COG1846	K	Transcriptional regulators	N	N	N
EC958_1866	ydhI	1892614	1892832	+	218	16	258	0.0733945	0.281195	5.40362e-08	19.3785	2.91697e-10	97.44	b1643	predicted inner membrane protein	NA	NA	NA	N	N	N
EC958_1867	ydhJ	1892853	1893692	+	839	58	455	0.0691299	0.245834	1.42873e-07	17.9364	2.0096e-37	99.65	b1644	predicted membrane fusion protein (MFP) of YdhJK efflux pump	COG1566	V	Multidrug resistance efflux pump	N	N	N
EC958_1868	ydhK	1893710	1895704	+	1994	148	1392	0.0742227	0.288163	4.47385e-08	19.6566	6.09177e-88	99.1	b1645	Efflux protein family (PET) component of predicted YdhJK efflux pump	COG1289	S	Predicted membrane protein	N	N	N
EC958_1869	sodC	1895723	1896226	-	503	32	284	0.0636183	0.201916	5.01992e-07	16.0452	9.9853e-23	98.84	b1646	superoxide dismutase, Cu, Zn	COG2032	P	Cu/Zn superoxide dismutase	N	N	N
EC958_1870	ydhF	1896325	1897203	-	878	83	870	0.094533	0.461012	4.36121e-10	26.3178	3.95635e-39	99.33	b1647	predicted oxidoreductase	COG4989	R	Predicted oxidoreductase	N	N	N
EC958_1871	1871	1897278	1897382	+	104	3	27	0.0288462	0.019147	0.00139231	2.83585	2.82592e-05	36.36	b4601	-	NA	NA	NA	N	N	N
EC958_1872	nemR	1897612	1898193	+	581	35	388	0.060241	0.17634	1.0842e-06	14.8689	3.87018e-26	100	b1649	transcriptional repressor for the nem operon, NEM-inactivated	COG1309	K	Transcriptional regulator	N	N	N
EC958_1873	nemA	1898248	1899327	+	1079	93	1475	0.0861909	0.390458	2.92159e-09	23.6152	6.3942e-48	99.73	b1650	N-ethylmaleimide reductase, FMN-linked	COG1902	C	NADH:flavin oxidoreductases, Old Yellow Enzyme family	N	N	N
EC958_1874	gloA	1899426	1899815	+	389	31	217	0.0796915	0.334707	1.2858e-08	21.4788	9.67363e-18	99.26	b1651	glyoxalase I, Ni-dependent	COG0346	E	Lactoylglutathione lyase and related lyases	N	N	N
EC958_1875	rnt	1899936	1900565	+	629	42	250	0.0667727	0.226762	2.44546e-07	17.1316	3.07799e-28	99.07	b1652	ribonuclease T (RNase T)	COG0847	L	DNA polymerase III, epsilon subunit and related 3'-5' exonucleases	N	N	N
EC958_1876	grxD	1900955	1901284	-	329	19	297	0.0577508	0.158277	1.91286e-06	13.992	4.07305e-15	100	b1654	glutaredoxin-4	COG0278	O	Glutaredoxin-related protein	N	N	N
EC958_1877	ydhO	1901637	1902446	+	809	61	584	0.0754017	0.298128	3.41928e-08	20.0516	4.12358e-36	97.82	b1655	predicted peptidase, C40 clan	COG0791	M	Cell wall-associated hydrolases (invasion-associated proteins)	N	N	N
EC958_1878	sodB	1902592	1903155	+	563	57	580	0.101243	0.515736	9.44434e-11	28.4643	2.37154e-25	99.48	b1656	superoxide dismutase, Fe	COG0605	P	Superoxide dismutase	N	N	N
EC958_1879	ydhP	1903319	1904470	-	1151	75	705	0.0651607	0.21396	3.53158e-07	16.5778	4.53513e-51	98.97	b1657	predicted transporter	COG2814	G	Arabinose efflux permease	N	N	N
EC958_1880	purR	1905042	1906049	+	1007	52	284	0.0516385	0.117321	7.70724e-06	11.8002	9.01536e-45	99.71	b1658	DNA-binding transcriptional repressor, hypoxanthine-binding	COG1609	K	Transcriptional regulators	N	N	N
EC958_1881	ydhB	1906064	1906978	-	914	47	454	0.0514223	0.11597	8.09669e-06	11.7215	1.05365e-40	99.35	b1659	predicted DNA-binding transcriptional regulator	COG0583	K	Transcriptional regulator	N	N	N
EC958_1882	ydhC	1907109	1908302	+	1193	97	918	0.0813076	0.348566	8.89506e-09	22.0128	6.60021e-53	99.26	b1660	predicted transporter	COG2814	G	Arabinose efflux permease	N	N	N
EC958_1883	cfa	1908611	1909741	+	1130	86	743	0.0761062	0.304104	2.91193e-08	20.287	3.75929e-50	100	b1661	cyclopropane fatty acyl phospholipid synthase (unsaturated-phospholipid methyltransferase)	COG2230	M	Cyclopropane fatty acid synthase and related methyltransferases	N	N	N
EC958_1884	ribC	1909799	1910422	-	623	6	25	0.00963082	0.000308638	0.111271	-7.62516	5.63248e-28	100	b1662	riboflavin synthase, alpha subunit	COG0307	H	Riboflavin synthase alpha chain	Y	Y	Y
EC958_1885	mdtK	1910655	1912010	+	1355	103	960	0.0760148	0.303327	2.97327e-08	20.2564	5.41833e-60	99.56	b1663	multidrug efflux system transporter	COG0534	V	Na+-driven multidrug efflux pump	N	N	N
EC958_1886	ydhQ	1912069	1913307	-	1238	91	667	0.0735057	0.282128	5.2684e-08	19.4159	7.10085e-55	98.8	b1664	conserved protein	COG3468	MU	Type V secretory pathway, adhesin AidA	N	N	N
EC958_1887	ydhR	1913899	1914186	+	287	10	86	0.0348432	0.0358989	0.000354752	5.36539	2.79867e-13	97.03	b1667	predicted monooxygenase	NA	NA	NA	N	N	N
EC958_1888	ydhS	1914330	1915916	+	1586	145	1334	0.091425	0.434972	8.85847e-10	25.3156	4.26768e-70	97	b1668	conserved protein with FAD/NAD(P)-binding domain	COG4529	S	Uncharacterized protein conserved in bacteria	N	N	N
EC958_1889	ydhT	1915946	1916740	-	794	47	428	0.059194	0.168658	1.37652e-06	14.5012	1.86792e-35	97.41	b1669	conserved protein	NA	NA	NA	N	N	N
EC958_1890	ydhU	1916762	1917529	-	767	60	532	0.0782269	0.322174	1.79555e-08	20.9931	2.83339e-34	96.93	b1670	predicted cytochrome	COG4117	C	Thiosulfate reductase cytochrome B subunit (membrane anchoring protein)	N	N	N
EC958_1891	ydhX	1917544	1918194	-	650	34	343	0.0523077	0.121548	6.61669e-06	12.0431	3.71322e-29	97.3	b1671	predicted 4Fe-4S ferridoxin-type protein	COG0437	C	Fe-S-cluster-containing hydrogenase components 1	N	N	N
EC958_1892	ydhW	1918276	1918896	-	620	30	255	0.0483871	0.0977668	1.61751e-05	10.6078	7.61932e-28	97.64	b1672	predicted protein	NA	NA	NA	N	N	N
EC958_1893	ydhV	1918927	1921011	-	2084	158	1447	0.0758157	0.301638	3.11129e-08	20.19	7.05094e-92	99.86	b1673	predicted oxidoreductase	COG2414	C	Aldehyde:ferredoxin oxidoreductase	N	N	N
EC958_1894	ydhY	1921050	1921658	-	608	53	353	0.0871711	0.39884	2.33652e-09	23.9349	2.55142e-27	99.04	b1674	predicted 4Fe-4S ferridoxin-type protein	COG0437	C	Fe-S-cluster-containing hydrogenase components 1	N	N	N
EC958_1895	ydhZ	1922132	1922323	-	191	47	437	0.246073	0.984048	4.31042e-25	71.9557	4.42467e-09	100	b1675	predicted protein	NA	NA	NA	N	N	N
EC958_1896	pykF	1922898	1924292	+	1394	88	891	0.0631277	0.19813	5.61403e-07	15.8752	1.06672e-61	100	b1676	pyruvate kinase I	COG0469	G	Pyruvate kinase	N	N	N
EC958_1897	lpp	1924621	1924839	+	218	23	554	0.105505	0.549154	3.57466e-11	29.8162	2.91697e-10	100	b1677	murein lipoprotein	COG4238	M	Murein lipoprotein	N	N	N
EC958_1898	ynhG	1924920	1925906	-	986	82	812	0.0831643	0.364505	5.82514e-09	22.624	7.47307e-44	99.4	b1678	murein L,D-transpeptidase	COG1376	S	Uncharacterized protein conserved in bacteria	N	N	N
EC958_1899	sufE	1926072	1926470	-	398	37	286	0.0929648	0.447919	6.23572e-10	25.8128	3.90787e-18	98.55	b1679	sulfur acceptor protein	COG2166	R	SufE protein probably involved in Fe-S center assembly	N	N	N
EC958_1900	sufS	1926501	1927703	-	1202	118	1207	0.0981697	0.490957	1.90332e-10	27.4839	2.6663e-53	99.26	b1680	cysteine desulfurase, stimulated by SufE; selenocysteine lyase, PLP-dependent	COG0520	E	Selenocysteine lyase	N	N	N
EC958_1901	sufD	1927718	1928971	-	1253	101	881	0.0806065	0.342551	1.04368e-08	21.7814	1.56757e-55	97.4	b1681	FeS cluster assembly protein of SufBCD complex	COG0719	O	ABC-type transport system involved in Fe-S cluster assembly, permease component	N	N	N
EC958_1902	sufC	1928964	1929692	-	728	42	277	0.0576923	0.157862	1.93852e-06	13.9713	1.4392e-32	99.19	b1682	component of SufBCD complex, ATP-binding component of ABC superfamily	COG0396	O	ABC-type transport system involved in Fe-S cluster assembly, ATPase component	N	N	N
EC958_1903	sufB	1929720	1931189	-	1469	97	865	0.0660313	0.220848	2.89579e-07	16.8772	5.5929e-65	99.39	b1683	component of SufBCD complex	COG0719	O	ABC-type transport system involved in Fe-S cluster assembly, permease component	N	N	N
EC958_1904	sufA	1931216	1931566	-	350	20	203	0.0571429	0.15398	2.19723e-06	13.7766	4.91365e-16	99.18	b1684	Fe-S cluster assembly protein	COG0316	S	Uncharacterized conserved protein	N	N	N
EC958_1905	ydiH	1932133	1932303	-	170	8	66	0.0470588	0.0902685	2.18962e-05	10.1146	3.66772e-08	100	b1685	predicted protein	NA	NA	NA	N	N	N
EC958_1906	ydiI	1932421	1932813	-	392	17	186	0.0433673	0.0710072	5.08029e-05	8.72313	7.1511e-18	98.53	b1686	acyl-CoA esterase in vitro	COG2050	Q	Uncharacterized protein, possibly involved in aromatic compounds catabolism	N	N	N
EC958_1907	ydiJ	1932828	1935866	-	3038	190	1703	0.0625411	0.193634	6.41731e-07	15.6715	1.32248e-133	99.51	b1687	predicted FAD-linked oxidoreductase	COG0277	C	FAD/FMN-containing dehydrogenases	N	N	N
EC958_1908	ydiK	1936098	1937192	+	1094	83	780	0.0758684	0.302085	3.07418e-08	20.2075	1.41157e-48	99.73	b1688	inner membrane protein, UPF0118 family	COG0628	R	Predicted permease	N	N	N
EC958_1909	ydiL	1937639	1937977	+	338	36	220	0.106509	0.556857	2.84311e-11	30.1337	1.6454e-15	97.46	b1689	conserved protein	NA	NA	NA	N	Y	Y
EC958_1910	ydiM	1938095	1939291	+	1196	150	728	0.125418	0.687574	3.81469e-13	36.0394	4.87912e-53	97.52	b1690	inner membrane protein, predicted transporter	COG2271	G	Sugar phosphate permease	N	N	N
EC958_1911	ydiN	1939536	1940783	+	1247	69	470	0.0553328	0.141466	3.31973e-06	13.132	2.86854e-55	98.81	b1691	Inner membrane protein, predicted MFS superfamily transporter	COG2814	G	Arabinose efflux permease	N	N	N
EC958_1912	ydiB	1940813	1941661	+	848	71	471	0.0837264	0.36933	5.12445e-09	22.8085	8.1182e-38	99.65	b1692	quinate/shikimate 5-dehydrogenase, NAD(P)-binding	COG0169	E	Shikimate 5-dehydrogenase	N	N	N
EC958_1913	aroD	1941710	1942450	+	740	37	242	0.05	0.107259	1.1198e-05	11.2018	4.29788e-33	100	b1693	3-dehydroquinate dehydratase	COG0710	E	3-dehydroquinate dehydratase	N	N	N
EC958_1914	ydiF	1942615	1944192	+	1577	140	797	0.0887762	0.412527	1.62045e-09	24.4572	1.05643e-69	99.62	b1694	fused predicted acetyl-CoA:acetoacetyl-CoA transferase: alpha subunit/beta subunit	COG4670	I	Acyl CoA:acetate/3-ketoacid CoA transferase	N	N	N
EC958_1915	ydiO	1944221	1945357	+	1136	67	432	0.0589789	0.167095	1.4457e-06	14.4255	2.05434e-50	100	b1695	predicted acyl-CoA dehydrogenase	COG1960	I	Acyl-CoA dehydrogenases	N	N	N
EC958_1916	ydiP	1945418	1946311	-	893	53	206	0.0593505	0.169798	1.32825e-06	14.5563	8.73397e-40	99.67	b1696	predicted DNA-binding transcriptional regulator	COG2207	K	AraC-type DNA-binding domain-containing proteins	N	N	N
EC958_1917	1917	1946432	1946590	-	158	15	101	0.0949367	0.464366	3.97774e-10	26.4476	1.22818e-07	30	b2039	-	NA	NA	NA	N	N	N
EC958_1918	ydiQ	1946645	1947391	+	746	50	458	0.0670241	0.228778	2.3092e-07	17.2177	2.34867e-33	97.64	b1697	conserved protein	COG2086	C	Electron transfer flavoprotein, beta subunit	N	N	N
EC958_1919	ydiR	1947429	1948349	+	920	65	456	0.0706522	0.258343	1.00977e-07	18.4531	5.75788e-41	97.76	b1698	predicted electron transfer flavoprotein, FAD-binding subunit	COG2025	C	Electron transfer flavoprotein, alpha subunit	N	N	N
EC958_1920	ydiS	1948422	1949693	+	1271	56	581	0.0440598	0.0744392	4.33834e-05	8.98661	2.55816e-56	98.37	b1699	predicted oxidoreductase with FAD/NAD(P)-binding domain	COG0644	C	Dehydrogenases (flavoproteins)	N	N	N
EC958_1921	ydiT	1949708	1949983	+	275	15	134	0.0545455	0.136158	3.9725e-06	12.8501	9.37168e-13	95.88	b1700	predicted 4Fe-4S ferredoxin-type protein	COG2440	C	Ferredoxin-like protein	N	N	N
EC958_1922	fadK	1950058	1951686	+	1628	154	1550	0.0945946	0.461524	4.30042e-10	26.3376	6.21099e-72	98.54	b1701	short chain acyl-CoA synthetase, anaerobic	COG0318	IQ	Acyl-CoA synthetases (AMP-forming)/AMP-acid ligases II	N	N	N
EC958_1923	ppsA	1951761	1954121	-	2360	167	1667	0.0707627	0.259257	9.84638e-08	18.4906	5.97484e-104	99.87	b1702	phosphoenolpyruvate synthase	COG0574	G	Phosphoenolpyruvate synthase/pyruvate phosphate dikinase	N	N	N
EC958_1924	1924	1954193	1954342	-	149	11	121	0.0738255	0.284818	4.89788e-08	19.5233	3.04027e-07	46.15	b0286	-	NA	NA	NA	N	N	N
EC958_1925	ppsR	1954472	1955287	+	815	50	310	0.0613497	0.184607	8.42029e-07	15.2566	2.25342e-36	100	b1703	bifunctional regulatory protein: PEP synthase kinase and PEP synthase pyrophosphorylase	COG1806	S	Uncharacterized protein conserved in bacteria	N	N	N
EC958_1926	aroH	1955462	1956490	+	1028	55	458	0.0535019	0.129256	5.03952e-06	12.4748	1.0876e-45	99.71	b1704	3-deoxy-D-arabino-heptulosonate-7-phosphate synthase, tryptophan repressible	COG0722	E	3-deoxy-D-arabino-heptulosonate 7-phosphate (DAHP) synthase	N	N	N
EC958_1927	ydiE	1956613	1956813	+	200	5	59	0.025	0.0116467	0.00334635	1.10833	1.78744e-09	98.41	b1705	conserved protein, hemin uptake protein HemP homolog	COG4256	P	Hemin uptake protein	N	N	N
EC958_1928	ydiU	1956835	1958256	-	1421	62	489	0.0436312	0.0723052	4.78363e-05	8.82369	7.03237e-63	97.08	b1706	conserved protein, UPF0061 family	COG0397	S	Uncharacterized conserved protein	N	N	N
EC958_1929	ydiV	1958337	1959032	-	695	57	277	0.0820144	0.354633	7.57125e-09	22.2458	3.99487e-31	96.62	b1707	predicted cyclic-di-GMP phosphodiesterase	COG2200	T	FOG: EAL domain	N	N	N
EC958_1930	nlpC	1959298	1959744	-	446	39	269	0.0874439	0.401171	2.19557e-09	24.0238	3.10796e-20	99.35	b1708	predicted peptidase, C40 clan, lipoprotein	COG0791	M	Cell wall-associated hydrolases (invasion-associated proteins)	N	N	N
EC958_1931	btuD	1959840	1960571	-	731	26	174	0.0355677	0.0383629	0.000300736	5.66026	1.06391e-32	98.8	b1709	vitamin B12 transporter subunit : ATP-binding component of ABC superfamily	COG4138	H	ABC-type cobalamin transport system, ATPase component	N	N	N
EC958_1932	btuE	1960589	1961122	-	533	27	188	0.0506567	0.111242	9.64098e-06	11.4422	4.86626e-24	97.81	b1710	predicted glutathione peroxidase	COG0386	O	Glutathione peroxidase	N	N	N
EC958_1933	btuC	1961203	1962165	-	962	55	458	0.0571726	0.154189	2.18241e-06	13.7871	8.37975e-43	99.69	b1711	vitamin B12 transporter subunit: membrane component of ABC superfamily	COG4139	H	ABC-type cobalamin transport system, permease component	N	N	N
EC958_1934	ihfA	1962284	1962565	-	281	12	82	0.0427046	0.0678025	5.90893e-05	8.46982	5.12135e-13	100	b1712	integration host factor (IHF), DNA-binding protein, alpha subunit	COG0776	L	Bacterial nucleoid DNA-binding protein	N	N	N
EC958_1935	pheT	1962588	1964957	-	2369	0	0	0	0	1	-173.929	2.41366e-104	99.37	b1713	phenylalanine tRNA synthetase, beta subunit	COG0072	J	Phenylalanyl-tRNA synthetase beta subunit	Y	Y	Y
EC958_1936	pheS	1964990	1965955	-	965	0	0	0	0	1	-173.929	6.19462e-43	99.69	b1714	phenylalanine tRNA synthetase, alpha subunit	COG0016	J	Phenylalanyl-tRNA synthetase alpha subunit	Y	Y	Y
EC958_1937	rplT	1966424	1966762	-	338	0	0	0	0	1	-173.929	1.6454e-15	100	b1716	50S ribosomal subunit protein L20	COG0292	J	Ribosomal protein L20	Y	Y	Y
EC958_1938	rpmI	1966833	1967012	-	179	1	2	0.00558659	3.34494e-05	0.27979	-11.3297	1.48165e-08	100	b1717	50S ribosomal subunit protein L35	COG0291	J	Ribosomal protein L35	Y	N	N
EC958_1939	infC	1967127	1967543	-	416	0	0	0	0	1	-173.929	6.37735e-19	100	b1718	protein chain initiation factor IF-3	COG0290	J	Translation initiation factor 3 (IF-3)	Y	Y	Y
EC958_1940	thrS	1967673	1969583	-	1910	1	4	0.00052356	1.42443e-09	0.88748	-24.0428	2.87612e-84	99.84	b1719	threonyl-tRNA synthetase	COG0441	J	Threonyl-tRNA synthetase	Y	Y	Y
EC958_1943	yniD	1971305	1971409	+	104	19	96	0.182692	0.913664	8.1344e-19	53.358	2.82592e-05	100	b4535	predicted protein	NA	NA	NA	N	N	N
EC958_1944	ydiY	1971480	1972220	-	740	101	760	0.136486	0.750393	3.0584e-14	39.4432	4.29788e-33	99.6	b1722	predicted outer membrane protein, acid-inducible	COG3137	M	Putative salt-induced outer membrane protein	N	N	N
EC958_1945	pfkB	1972524	1973435	+	911	42	347	0.0461032	0.0850566	2.72266e-05	9.75738	1.42532e-40	99.35	b1723	6-phosphofructokinase II	COG1105	G	Fructose-1-phosphate kinase and related fructose-6-phosphate kinase (PfkB)	N	N	N
EC958_1946	ydiZ	1973554	1973826	+	272	28	299	0.102941	0.529188	6.41293e-11	29.0039	1.26775e-12	97.92	b1724	predicted protein	NA	NA	NA	N	N	N
EC958_1947	yniA	1973950	1974792	+	842	72	592	0.0855107	0.384633	3.41172e-09	23.393	1.48557e-37	99.65	b1725	predicted phosphotransferase/kinase	COG3001	G	Fructosamine-3-kinase	N	N	N
EC958_1948	yniB	1974851	1975369	-	518	51	601	0.0984556	0.493284	1.78322e-10	27.5753	2.20434e-23	99.44	b1726	predicted inner membrane protein	NA	NA	NA	N	N	N
EC958_1949	yniC	1975534	1976184	+	650	55	538	0.0846154	0.376958	4.18432e-09	23.1	3.71322e-29	99.1	b1727	2-deoxyglucose-6-P phosphatase	COG0637	R	Predicted phosphatase/phosphohexomutase	N	N	N
EC958_1950	ydjM	1976366	1976938	+	572	52	494	0.0909091	0.430617	9.96413e-10	25.1487	9.58034e-26	99.49	b1728	inner membrane protein regulated by LexA	COG1988	R	Predicted membrane-bound metal-dependent hydrolases	N	N	N
EC958_1951	ydjN	1977089	1978462	+	1373	69	593	0.0502549	0.108797	1.05658e-05	11.2952	8.84231e-61	99.35	b1729	predicted transporter	COG1823	R	Predicted Na+/dicarboxylate symporter	N	N	N
EC958_1952	cedA	1978527	1978751	-	224	13	73	0.0580357	0.160307	1.79254e-06	14.0928	1.59404e-10	97.5	b1731	cell division modulator	NA	NA	NA	N	N	N
EC958_1953	katE	1978973	1981216	+	2243	140	1351	0.0624164	0.192683	6.60244e-07	15.6282	7.83017e-99	98.67	b1732	hydroperoxidase HPII(III) (catalase)	COG0753	P	Catalase	N	N	N
EC958_1954	chbG	1981281	1982021	-	740	51	681	0.0689189	0.244112	1.49915e-07	17.8646	4.29788e-33	92.06	b1733	conserved protein, UPF0249 family	COG3394	S	Uncharacterized protein conserved in bacteria	N	N	N
EC958_1955	chbF	1982052	1983386	-	1334	178	1304	0.133433	0.734093	6.135e-14	38.5076	4.49139e-59	98.89	b1734	phospho-chitobiase; general 6-phospho-beta-glucosidase activity	COG1486	G	Alpha-galactosidases/6-phospho-beta-glucosidases, family 4 of glycosyl hydrolases	N	N	N
EC958_1956	chbR	1983507	1984328	-	821	31	176	0.0377588	0.0464039	0.000182485	6.54026	1.23143e-36	99.28	b1735	rRepressor, chb operon for N,N'-diacetylchitobiose utilization	COG2207	K	AraC-type DNA-binding domain-containing proteins	N	N	N
EC958_1957	chbA	1984357	1984689	-	332	47	455	0.141566	0.77581	9.60527e-15	40.9944	3.01095e-15	100	b1736	N,N'-diacetylchitobiose-specific enzyme IIA component of PTS	COG1447	G	Phosphotransferase system cellobiose-specific component IIA	N	N	N
EC958_1958	chbC	1984758	1986317	-	1559	154	711	0.0987813	0.495929	1.65561e-10	27.6793	6.47352e-69	85.71	b1737	N,N'-diacetylchitobiose-specific enzyme IIC component of PTS	COG1455	G	Phosphotransferase system cellobiose-specific component IIC	N	N	N
EC958_1959	chbB	1986420	1986722	-	302	18	170	0.0596026	0.171642	1.25405e-06	14.6449	6.1783e-14	100	b1738	N,N'-diacetylchitobiose-specific enzyme IIB component of PTS	COG1440	G	Phosphotransferase system cellobiose-specific component IIB	N	N	N
EC958_1960	osmE	1987039	1987359	-	320	27	306	0.084375	0.374896	4.42004e-09	23.0212	1.00825e-14	99.11	b1739	DNA-binding transcriptional activator	COG2913	J	Small protein A (tmRNA-binding)	N	N	N
EC958_1961	nadE	1987579	1988388	+	809	3	13	0.00370828	6.05246e-06	0.429355	-13.8017	4.12358e-36	98.18	b1740	NAD synthetase, NH3/glutamine-dependent	COG0171	H	NAD synthase	Y	Y	Y
EC958_1962	cho	1988636	1989505	+	869	53	494	0.0609896	0.181908	9.14068e-07	15.1309	9.79363e-39	97.63	b1741	endonuclease of nucleotide excision repair	COG0322	L	Nuclease subunit of the excinuclease complex	N	N	N
EC958_1963	spy	1990261	1990728	-	467	46	440	0.0985011	0.493654	1.76483e-10	27.5898	3.74938e-21	98.76	b1743	envelope stress induced periplasmic protein	COG3678	UNTP	P pilus assembly/Cpx signaling pathway, periplasmic inhibitor/zinc-resistance associated protein	N	N	N
EC958_1964	astE	1991076	1992026	-	950	64	661	0.0673684	0.231545	2.13486e-07	17.3355	2.80606e-42	99.38	b1744	succinylglutamate desuccinylase	COG2988	E	Succinylglutamate desuccinylase	N	N	N
EC958_1965	astB	1992037	1993362	-	1325	81	874	0.0611321	0.182974	8.84861e-07	15.1806	1.11181e-58	97.54	b1745	succinylarginine dihydrolase	COG3724	E	Succinylarginine dihydrolase	N	N	N
EC958_1966	astD	1993377	1994837	-	1460	109	1300	0.0746575	0.291832	4.05156e-08	19.8024	1.38448e-64	97.15	b1746	succinylglutamic semialdehyde dehydrogenase	COG1012	C	NAD-dependent aldehyde dehydrogenases	N	N	N
EC958_1967	astA	1994852	1995868	-	1016	59	712	0.0580709	0.160558	1.77823e-06	14.1052	3.64195e-45	99.13	b1747	arginine succinyltransferase	COG3138	E	Arginine/ornithine N-succinyltransferase beta subunit	N	N	N
EC958_1968	astC	1995883	1997085	-	1202	74	825	0.0615641	0.186221	8.01865e-07	15.3314	2.6663e-53	97.29	b1748	succinylornithine transaminase, PLP-dependent	COG4992	E	Ornithine/acetylornithine aminotransferase	N	N	N
EC958_1969	1969	1997366	1997518	+	152	5	47	0.0328947	0.0297495	0.000553167	4.56185	2.24748e-07	41.18	b1317	-	NA	NA	NA	N	N	N
EC958_1970	xthA	1997549	1998337	+	788	39	429	0.0494924	0.104227	1.2572e-05	11.0154	3.41814e-35	97.76	b1749	exonuclease III	COG0708	L	Exonuclease III	N	N	N
EC958_1971	ydjX	1998522	1999214	+	692	122	1430	0.176301	0.89898	3.49314e-18	51.4557	5.40405e-31	98.31	b1750	inner membrane protein, TVP38/TMEM64 family	COG0398	S	Uncharacterized conserved protein	N	N	N
EC958_1972	ydjY	1999237	1999896	+	659	56	406	0.0849772	0.380061	3.85296e-09	23.2185	1.50003e-29	99.11	b1751	predicted protein	NA	NA	NA	N	N	N
EC958_1973	ydjZ	1999928	2000617	+	689	46	418	0.0667634	0.226688	2.45061e-07	17.1284	7.31031e-31	99.15	b1752	Inner membrane protein, TVP38/TMEM64 family	COG0398	S	Uncharacterized conserved protein	N	N	N
EC958_1974	ynjA	2000635	2001165	+	530	33	264	0.0622642	0.191523	6.83566e-07	15.5752	6.58282e-24	97.8	b1753	conserved protein	COG2128	S	Uncharacterized conserved protein	N	N	N
EC958_1975	ynjB	2001193	2002341	+	1148	47	453	0.0409408	0.0596582	8.83408e-05	7.78989	6.13488e-51	98.2	b1754	conserved protein	COG4134	R	ABC-type uncharacterized transport system, periplasmic component	N	N	N
EC958_1976	ynjC	2002332	2003849	+	1517	91	978	0.0599868	0.174464	1.14888e-06	14.7798	4.44808e-67	96.48	b1755	Predicted inner membrane ABC transporter permease, function unknown	COG4135	R	ABC-type uncharacterized transport system, permease component	N	N	N
EC958_1977	ynjD	2003867	2004502	+	635	44	454	0.0692913	0.247154	1.37711e-07	17.9913	1.68203e-28	96.31	b1756	predicted transporter subunit: ATP-binding component of ABC superfamily	COG4136	R	ABC-type uncharacterized transport system, ATPase component	N	N	N
EC958_1978	ynjE	2004587	2005876	+	1289	65	707	0.0504267	0.109839	1.016e-05	11.3581	4.17474e-57	98.39	b1757	predicted thiosulfate sulfur transferase	COG2897	P	Rhodanese-related sulfurtransferase	N	N	N
EC958_1979	ynjF	2005903	2006505	-	602	34	251	0.0564784	0.149337	2.55663e-06	13.5406	4.66891e-27	96.12	b1758	inner membrane protein, phosphatidylglycerophosphate synthase homolog	COG0558	I	Phosphatidylglycerophosphate synthase	N	N	N
EC958_1980	nudG	2006610	2006999	+	389	20	197	0.0514139	0.115917	8.11228e-06	11.7184	9.67363e-18	96.3	b1759	CTP pyrophosphohydrolas; also hydrolyzes 2-hydroxy-dATP, 8-hydroxy-dGTP, CTP, dCTP and 5-methyl-dCTP	COG1051	F	ADP-ribose pyrophosphatase	N	N	N
EC958_1981	ynjH	2006983	2007237	-	254	33	548	0.129921	0.714377	1.36636e-13	37.4284	7.76843e-12	95.56	b1760	conserved protein, DUF1496 family	NA	NA	NA	N	N	N
EC958_1982	gdhA	2007491	2008816	+	1325	77	649	0.0581132	0.16086	1.76114e-06	14.1202	1.11181e-58	99.33	b1761	glutamate dehydrogenase, NADP-specific	COG0334	E	Glutamate dehydrogenase/leucine dehydrogenase	N	N	N
EC958_1983	topB	2008911	2010848	-	1937	105	974	0.0542075	0.133906	4.29065e-06	12.7288	1.89608e-85	97.39	b1763	DNA topoisomerase III	COG0550	L	Topoisomerase IA	N	N	N
EC958_1984	selD	2010871	2011896	-	1025	64	500	0.062439	0.192855	6.56848e-07	15.6361	1.47124e-45	99.42	b1764	selenophosphate synthase	COG0709	E	Selenophosphate synthase	N	N	N
EC958_1985	ydjA	2012031	2012564	-	533	40	370	0.0750469	0.295124	3.70739e-08	19.9328	4.86626e-24	99.45	b1765	predicted oxidoreductase	COG0778	C	Nitroreductase	N	N	N
EC958_1986	sppA	2012731	2014581	+	1850	142	1320	0.0767568	0.309635	2.51052e-08	20.504	1.21098e-81	99.19	b1766	protease IV (signal peptide peptidase)	COG0616	OU	Periplasmic serine proteases (ClpP class)	N	N	N
EC958_1987	1987	2014715	2015407	+	692	64	602	0.0924855	0.443898	6.95573e-10	25.6582	5.40405e-31	25.68	b3238	-	COG2859	S	Uncharacterized protein conserved in bacteria	N	N	N
EC958_1988	ansA	2015605	2016555	+	950	53	445	0.0557895	0.144583	2.99147e-06	13.2951	2.80606e-42	99.38	b1767	cytoplasmic L-asparaginase I	COG0252	EJ	L-asparaginase/archaeal Glu-tRNAGln amidotransferase subunit D	N	N	N
EC958_1989	pncA	2016584	2017207	+	623	76	934	0.12199	0.666026	8.33411e-13	34.978	5.63248e-28	97.64	b1768	nicotinamidase/pyrazinamidase	COG1335	Q	Amidases related to nicotinamidase	N	N	N
EC958_1990	ydjE	2017318	2018613	-	1295	103	729	0.0795367	0.33338	1.332e-08	21.4275	2.28137e-57	98.4	b1769	predicted transporter	COG2271	G	Sugar phosphate permease	N	N	N
EC958_1992	ydjF	2018794	2019534	-	740	71	468	0.0959459	0.47272	3.16013e-10	26.7716	4.29788e-33	98.41	b1770	predicted DNA-binding transcriptional regulator	COG1349	KG	Transcriptional regulators of sugar metabolism	N	N	N
EC958_1993	ydjG	2019689	2020651	-	962	94	809	0.0977131	0.487233	2.11216e-10	27.3378	8.37975e-43	98.47	b1771	alpha-Keto reductase, NADH-dependent; can use methylglyoxal as substrate	COG0667	C	Predicted oxidoreductases (related to aryl-alcohol dehydrogenases)	N	N	N
EC958_1994	ydjH	2020679	2021608	-	929	117	798	0.125942	0.69078	3.38526e-13	36.2013	2.32602e-41	98.73	b1772	predicted kinase	COG0524	G	Sugar kinases, ribokinase family	N	N	N
EC958_1995	ydjI	2021631	2022449	-	818	59	254	0.0721271	0.270588	7.21398e-08	18.9517	1.66581e-36	99.28	b1773	predicted aldolase	COG0191	G	Fructose/tagatose bisphosphate aldolase	N	N	N
EC958_1996	ydjJ	2022488	2023513	-	1025	137	1594	0.133659	0.735322	5.82788e-14	38.5767	1.47124e-45	99.42	b1774	predicted oxidoreductase, Zn-dependent and NAD(P)-binding	COG1063	ER	Threonine dehydrogenase and related Zn-dependent dehydrogenases	N	N	N
EC958_1997	ydjK	2023548	2024909	-	1361	182	2378	0.133725	0.735685	5.73997e-14	38.5972	2.96096e-60	100	b1775	predicted transporter	COG2271	G	Sugar phosphate permease	N	N	N
EC958_1998	ydjL	2024954	2026012	-	1058	42	302	0.0396975	0.054258	0.00011729	7.30535	5.30032e-47	99.44	b1776	predicted oxidoreductase, Zn-dependent and NAD(P)-binding	COG1063	ER	Threonine dehydrogenase and related Zn-dependent dehydrogenases	N	N	N
EC958_1999	yeaC	2026400	2026654	-	254	13	122	0.0511811	0.11447	8.55445e-06	11.6336	7.76843e-12	96.67	b1777	conserved protein	COG3139	S	Uncharacterized protein conserved in bacteria	N	N	N
EC958_2000	msrB	2026714	2027109	-	395	11	136	0.0278481	0.0169689	0.00174807	2.39677	5.28635e-18	100	b1778	methionine sulfoxide reductase B	COG0229	O	Conserved domain frequently associated with peptide methionine sulfoxide reductase	N	N	N
EC958_2001	gapA	2027469	2028446	+	977	14	36	0.0143296	0.00147709	0.0381176	-4.44863	1.8499e-43	100	b1779	glyceraldehyde-3-phosphate dehydrogenase A	COG0057	G	Glyceraldehyde-3-phosphate dehydrogenase/erythrose-4-phosphate dehydrogenase	Y	Y	N
EC958_2002	yeaD	2028548	2029414	+	866	43	411	0.0496536	0.105185	1.21183e-05	11.0746	1.32483e-38	97.96	b1780	conserved protein	COG0676	G	Uncharacterized enzymes related to aldose 1-epimerase	N	N	N
EC958_2003	yeaE	2029483	2030319	-	836	39	368	0.0466507	0.0880238	2.40313e-05	9.96227	2.71848e-37	97.54	b1781	aldo-keto reductase, methylglyoxal to acetol, NADPH-dependent	COG0656	R	Aldo/keto reductases, related to diketogulonate reductase	N	N	N
EC958_2004	mipA	2030427	2031155	-	728	52	379	0.0714286	0.264775	8.45951e-08	18.7158	1.4392e-32	99.6	b1782	scaffolding protein for murein synthesizing machinery	COG3713	M	Outer membrane protein V	N	N	N
EC958_2005	yeaG	2031609	2033525	+	1916	89	702	0.0464509	0.0869353	2.51513e-05	9.88759	1.57171e-84	100	b1783	protein kinase, function unknown; autokinase	COG2766	T	Putative Ser protein kinase	N	N	N
EC958_2006	yeaH	2033656	2034921	+	1265	65	472	0.0513834	0.115727	8.16886e-06	11.7073	4.68124e-56	99.77	b1784	conserved protein	COG2718	S	Uncharacterized conserved protein	N	N	N
EC958_2007	yeaI	2035227	2036543	+	1316	47	222	0.0357143	0.0388731	0.000290852	5.71967	2.7522e-58	99.55	b1785	predicted diguanylate cyclase	COG2199	T	FOG: GGDEF domain	N	N	N
EC958_2008	yeaJ	2036742	2038214	+	1472	219	1612	0.148777	0.808351	1.85569e-15	43.186	4.13447e-65	99.4	b1786	predicted diguanylate cyclase	COG2199	T	FOG: GGDEF domain	N	N	N
EC958_2009	yeaK	2038275	2038760	+	485	31	221	0.0639175	0.204236	4.68886e-07	16.1487	6.11872e-22	99.4	b1787	conserved protein	COG2606	S	Uncharacterized conserved protein	N	N	N
EC958_2010	yoaI	2038779	2038913	-	134	3	20	0.0223881	0.00785328	0.00607013	-0.127915	1.37719e-06	97.06	b1788	predicted protein	NA	NA	NA	N	N	N
EC958_2011	yeaL	2039053	2039481	+	428	23	184	0.0537383	0.130806	4.77512e-06	12.56	1.90447e-19	100	b1789	predicted inner membrane protein, UPF0756 family	COG2707	S	Predicted membrane protein	N	N	N
EC958_2012	yeaN	2040374	2041537	+	1163	75	566	0.0644884	0.208684	4.11663e-07	16.346	1.35433e-51	99.24	b1791	predicted transporter	COG2807	P	Cyanate permease	N	N	N
[truncated: 2,792 more rows]
